# Supplementary material for: The chiral pyridoxal-catalyzed biomimetic Mannich reaction: the mechanism and origin of stereoselectivity
Source: Royal Society of Chemistry journal article supplement (doi:10.1039/d2qo00705c), 2022-01-01
Supplement: d2qo00705c1.pdf [file d2qo00705c1.pdf]

## SUPPORTING INFORMATION FOR

### Chiral Pyridoxal-Catalyzed Biomimetic Mannich Reaction:

#### Mechanism and Origin of Stereoselectivity

Li-Li Han<sup>a</sup>, Qiao-Yu Zhang<sup>a</sup>, Xue Li<sup>a</sup>, Yan Qiao,<sup>\*b</sup> Yu Lan,<sup>\*a</sup> and Donghui Wei<sup>\*a</sup>

<sup>a</sup> Green Catalysis Center and College of Chemistry, Zhengzhou University, 100 Science Avenue, Zhengzhou, Henan 450001, China

<sup>b</sup> Department of Pathophysiology, School of Basic Medical Sciences, Zhengzhou University, 100 Science Avenue, Zhengzhou, Henan 450001, P.R. China.

E-mail: [yanqiao@zzu.edu.cn](mailto:yanqiao@zzu.edu.cn); [lanyu@cqu.edu.cn](mailto:lanyu@cqu.edu.cn); [donghuiwei@zzu.edu.cn](mailto:donghuiwei@zzu.edu.cn);

## Contents

|                                                                                       |           |
|---------------------------------------------------------------------------------------|-----------|
| <b>Part 1: Computational details.....</b>                                             | <b>S3</b> |
| <b>Part 2: Additional computational results .....</b>                                 | <b>S4</b> |
| 2.1 Other unfavorable pathway for the formation of <b>M1'</b> .....                   | S4        |
| 2.2 Other unfavorable pathway for the formation of <b>M7RR'</b> .....                 | S5        |
| <b>Part 3: Other unfavorable deprotonation pathways of M4 .....</b>                   | <b>S6</b> |
| <b>Part 4: AIM analyses for transition states TS5RR, TS5SS, TS5SR and TS5RS .....</b> | <b>S7</b> |
| <b>Part 5: Comparison of different configurations of TS5s.....</b>                    | <b>S8</b> |
| <b>Part 6: The Cartesian coordinates of all the stationary points.....</b>            | <b>S9</b> |

## Part 1: Computational details

All the calculations were performed with the Gaussian09<sup>1</sup> program by using density functional theory, which has been identified to be a powerful and widely used method for exploring the reaction mechanisms. The solvent effect was considered using the implicit IEF-PCM model. All structures of the stationary points were completely optimized by the B3LYP-D3 functional at the 6-31G(d, p) basis set in the mixed solvent of H<sub>2</sub>O and CHCl<sub>3</sub> with a ratio of 1:1 using a dielectric constant value of 41.5. Frequency calculations were carried out at the same level to confirm the characteristics of all of the optimized structures as minima (no imaginary frequency) or transition states (only one imaginary frequency) and provided the thermal relative Gibbs free energy correction. All the energies discussed in the main text are the relative Gibbs free energies (GFE), which were obtained by the addition of the thermal Gibbs free energy corrections (GFEC) at the B3LYP-D3/6-31G(d, p)/IEF-PCM<sub>solvent</sub> level and the single-point energies (SPE) at a higher computational level of B3LYP-D3/6-311++G(2df, 2pd)/IEF-PCM<sub>solvent</sub>. Atom-in-molecule (AIM) quantitative analysis were plotted by using Multiwfn and VMD, and the computed 3D-structures were rendered using the CYLview software.

We have denoted the computational levels B3LYP-D3/6-31G(d, p)/IEF-PCM<sub>solvent</sub>, M06-2X/6-31G(d, p)/IEF-PCM<sub>solvent</sub>,  $\omega$ B97X-D/6-31G(d, p)/IEF-PCM<sub>solvent</sub>, B3LYP-D3/6-31G(d, p)/IEF-PCM<sub>solvent</sub>//B3LYP-D3/6-311++G(2df, 2pd)/IEF-PCM<sub>solvent</sub>, B3LYP-D3/6-31G(d, p)/IEF-PCM<sub>solvent</sub>//6-311+G(d, p) as L1-5 levels, respectively. To check whether the selected method is reliable, different DFT methods including M06-2X and  $\omega$ B97X-D have been performed additionally for the key transition states involved in the stereoselectivity-determining step, and the computed results were summarized as Table S1. There are small differences between the energies calculated by different methods. Thus, the selected DFT method is appropriate for the system studied in this work.

**Table S1.** The relative GFE (kcal/mol) of transition states **TS5RR/SS** calculated at L1, L2, and L3 levels.

|              | L1  | L2  | L3  |
|--------------|-----|-----|-----|
| <b>TS5RR</b> | 0.0 | 0.0 | 0.0 |
| <b>TS5SS</b> | 2.1 | 3.8 | 2.9 |

To test the accuracy of the selected basis set, we also performed the single-point energy calculations using the other two different basis sets including 6-311++G(2df, 2pd) and 6-311+G(d, p)

for the key transition states **TS5RR/RS/SR/SS**. As summarized in Table S2, the relative GFEs of **TS5RR/RS/SR/SS** calculated by L5 level are close to those calculated by the selected L4 level. Thus, the calculated results should be reliable and the selected basis set is suitable for the systems studied in this work.

**Table S2.** The relative GFE (kcal/mol) of transition states **TS5RR/RS/SR/SS** calculated at L4 and L5 level.

|              | L4  | L5  |
|--------------|-----|-----|
| <b>TS5RR</b> | 0   | 0   |
| <b>TS5SS</b> | 2.1 | 2.2 |
| <b>TS5SR</b> | 4.2 | 4.8 |
| <b>TS5RS</b> | 8.3 | 8.9 |

In addition, the extent of enantioselectivity, in terms of enantiomeric excess (ee %), was also calculated by using the Boltzmann distribution of diastereomeric transition states with the following equation:

$$\frac{[RR]}{[SS]} = \frac{\exp\left(\frac{-\Delta G_{[RR]}^\ddagger}{RT}\right)}{\exp\left(\frac{-\Delta G_{[SS]}^\ddagger}{RT}\right)} = \exp\left(\frac{\Delta\Delta G_{[SS]}^\ddagger - [RR]}{RT}\right)$$

$$ee = \frac{[RR] - [SS]}{[RR] + [SS]} \times 100\% = \frac{\frac{[RR]}{[SS]} - 1}{\frac{[RR]}{[SS]} + 1} \times 100\%$$

Where  $\Delta G^\ddagger$  is the GFE barrier of the competing diastereomeric transition state and  $\Delta\Delta G^\ddagger$  is the GFE barrier difference between the two diastereomeric transition states.

## Part 2: Additional computational results

### 2.1 Other unfavorable pathway for the formation of **M1'**

Other possible pathways of nucleophilic addition were considered and discussed as follows. Both the attack modes on *Re*- and *Si*-faces of C2=O1 of (**R,S**)-**Cat** were investigated. As shown in Fig. S1, the reactant **R1** and catalyst (**R,S**)-**Cat** were transformed to quaternary ammonium salt **M1'** via transition state **TS1'** ( $\Delta G^\ddagger = 2.0$  kcal/mol). The energy barrier of the nucleophilic addition pathway is higher than that of the pathway via **TS1** ( $\Delta G^\ddagger = 0.1$  kcal/mol), so the pathway cannot be safely excluded.

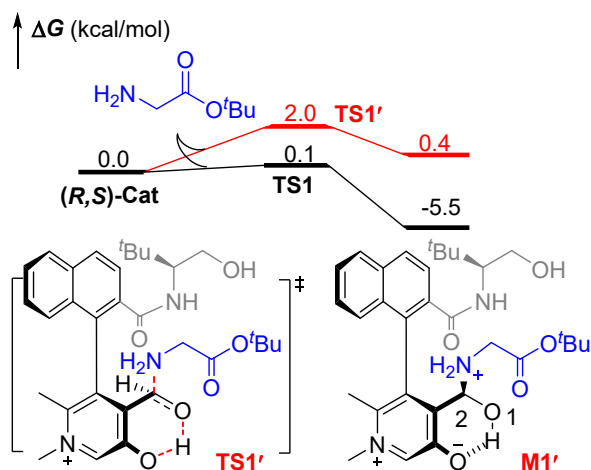

**Fig. S1** The relative GFE profiles for the formation of intermediates **M1/M1'** via transition states **TS1/TS1'**.

## 2.2 Other unfavorable pathway for the formation of **M7RR'**

Next, we considered and discussed other possible pathway of hydrolysis. Both the attack modes on *Re*- and *Si*-faces of  $C2=N$  of **(R,S)-Cat** were investigated. As shown in Fig. S2, after we obtained the intermediate **M6RR**, the pathway of the  $HCO_3^-$  assisted dehydration to form secondary amine intermediate **M7RR'** via transition state **TS7RR'** ( $\Delta G^\ddagger = 13.5$  kcal/mol). The energy barrier of the pathway is higher than that of the pathway via **TS7RR** ( $\Delta G^\ddagger = 8.7$  kcal/mol), so the pathway cannot be safely excluded.

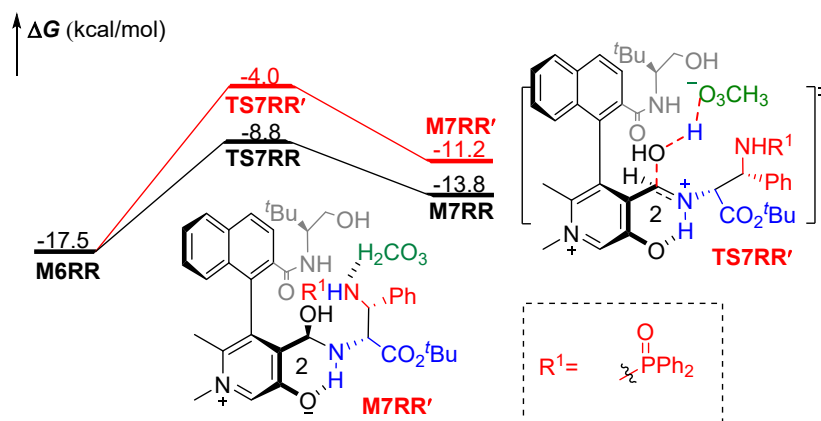

**Fig. S2** The relative GFE profiles for hydrolysis from intermediate **M6RR** to intermediates **M7RR/M7RR'** via transition states **TS7RR/TS7RR'**.

### Part 3: Other unfavorable deprotonation pathways of M4

As shown in Fig. S3, the  $\alpha$ -C-H of intermediate **M3-1** was deprotonated by  $\text{HCO}_3^-$  via transition state **TS4** ( $\Delta G^\ddagger = 5.3$  kcal/mol). The  $\alpha$ -C-H of intermediate **M3-1** was deprotonated by glycine **R1** via transition state **TS4-2** ( $\Delta G^\ddagger = 10.5$  kcal/mol). The  $\alpha$ -C-H of intermediate **M3-1** was deprotonated by the oxygen of phenyl N-diphenylphosphinimine **R2** via transition state **TS4-3** ( $\Delta G^\ddagger = 15.9$  kcal/mol). The  $\alpha$ -C-H of intermediate **M3-1** was deprotonated the nitrogen of phenyl N-diphenylphosphinimine **R2** via transition state **TS4-4** ( $\Delta G^\ddagger = 25.4$  kcal/mol). The  $\alpha$ -C-H of intermediate **M3-1** was deprotonated by oxygen negative with the assistance of  $\text{H}_2\text{O}$  via transition state **TS4-5** ( $\Delta G^\ddagger = 19.2$  kcal/mol). The  $\alpha$ -C-H of intermediate **M3-1** was deprotonated by hydroxide anion with the assistance of  $\text{H}_2\text{O}$  via transition state **TS4-6** ( $\Delta G^\ddagger = 33.7$  kcal/mol).

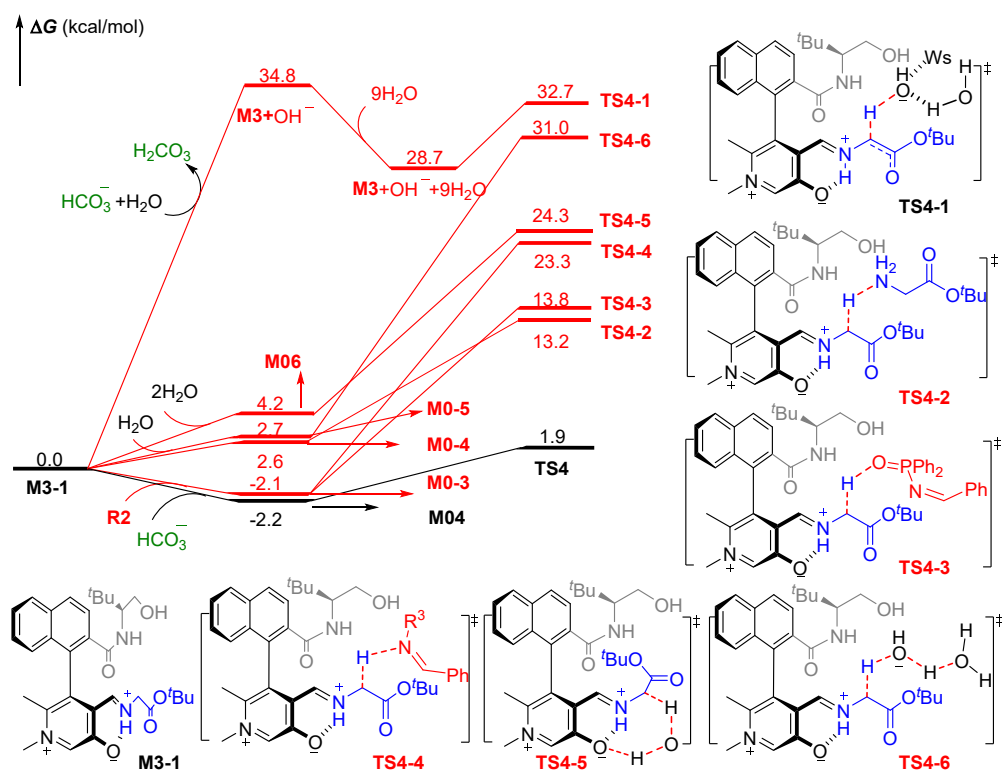

**Fig. S3** Relative Gibbs free energy profiles of transition states **TS4**/**TS4-1**/**TS4-2**/**TS4-3**/**TS4-4**/**TS4-5**/**TS4-6** and structures, the red and black path represent the deprotonation via different pathways, respectively. (Ws represents the other nine water molecules)

## Part 4: AIM analyses for transition states TS5RR, TS5SS, TS5SR and TS5RS

Herein, all the weak interactions with the values of Laplacian of electron densities were summarized in Table S3. Two N–H...O (1.67 Å, 1.73 Å), one O–H...N (1.86 Å), six C–H... $\pi$  (2.25 Å, 2.55 Å, 2.73 Å, 2.68 Å, 2.75 Å, 3.16 Å) and five C–H...O (2.26 Å, 2.58 Å, 2.44 Å, 2.47 Å, 2.68 Å) interactions can be found in **TS5RR**. Two N–H...O (1.75 Å, 1.80 Å), one O–H...O (1.93 Å), three C–H... $\pi$  (3.05 Å, 2.96 Å, 3.37 Å), one C–H...N (2.54 Å), one  $\pi$ - $\pi$  stacking and five C–H...O (2.44 Å, 2.45 Å, 2.30 Å, 2.45 Å, 2.49 Å) interactions exist in **TS5SS**. One O–H...O (1.72 Å), one N–H...O (1.80 Å), two C–H... $\pi$  (2.93 Å, 2.75 Å), three C–H...N (2.55 Å, 2.32 Å, 2.70 Å), three C–H...O (2.43 Å, 2.44 Å, 2.46 Å) and two LP... $\pi$  (3.34 Å, 2.86 Å) interactions exist in **TS5SR**, and one N–H...O (1.81 Å), one O–H...O (1.81 Å), three four C–H...O (2.44 Å, 2.45 Å, 2.63 Å, 2.90 Å), one LP... $\pi$  (3.48 Å), one N–H... $\pi$  (3.00 Å) and six C–H... $\pi$  (2.94 Å, 2.17 Å, 3.00 Å, 2.94 Å, 3.10 Å, 3.20 Å) interactions exist in **TS5RS**.

**Table S3.** AIM analyses of the transition states **TS5RR/SS/SR/RS** and the summary of Laplacian of electron density. Bond critical points (BCPs, orange color) along the bond paths (yellow color) ( $\nabla^2\rho$  in  $10^{-1}$  a.u.).

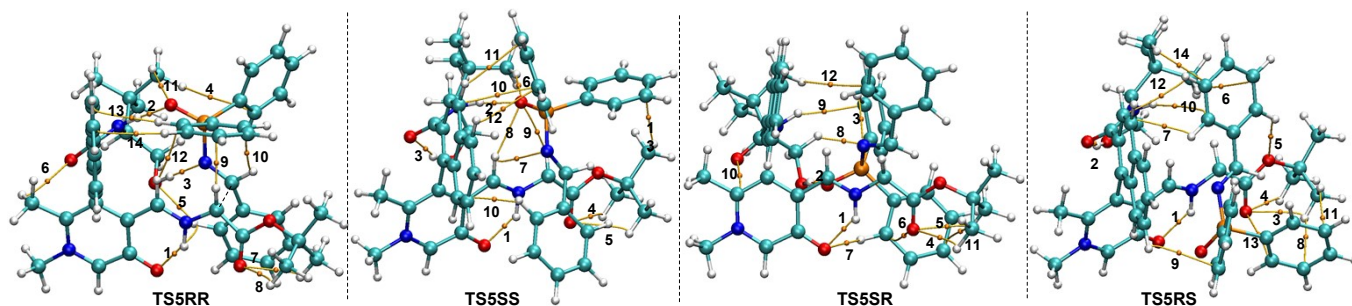

| TS5RR (0.0 kcal/mol) |                |             | TS5SS (2.1 kcal/mol) |                |             | TS5SR (4.2 kcal/mol) |                |              | TS5RS (8.3 kcal/mol) |                |             |
|----------------------|----------------|-------------|----------------------|----------------|-------------|----------------------|----------------|--------------|----------------------|----------------|-------------|
| type                 | $\nabla^2\rho$ | distance(Å) | type                 | $\nabla^2\rho$ | distance(Å) | Type                 | $\nabla^2\rho$ | distance(Å)  | type                 | $\nabla^2\rho$ | distance(Å) |
| N-H...O              | 1.500          | 1.67        | N-H...O              | 1.280          | 1.75        | O-H...O              | 1.158          | 1.72         | N-H...O              | 1.140          | 1.81        |
| N-H...O              | 1.273          | 1.73        | N-H...O              | 1.061          | 1.80        | N-H...O              | 1.250          | 1.80         | O-H...O              | 1.053          | 1.81        |
| O-H...N              | 0.879          | 1.85        | O-H...O              | 0.782          | 1.93        | C-H...N              | 0.455          | 2.55         | C-H...O              | 0.446          | 2.44        |
| C-H... $\pi$         | 0.591          | 2.25        | C-H...O              | 0.445          | 2.44        | C-H...O              | 0.452          | 2.43         | C-H...O              | 0.439          | 2.45        |
| C-H...O              | 0.482          | 2.26        | C-H...O              | 0.432          | 2.45        | C-H...O              | 0.450          | 2.44         | C-H...O              | 0.273          | 2.63        |
| C-H...O              | 0.439          | 2.58        | C-H...O              | 0.420          | 2.30        | LP... $\pi$          | 0.450          | 3.34         | C-H...O              | 0.211          | 2.90        |
| C-H...O              | 0.439          | 2.44        | C-H...N              | 0.383          | 2.54        | C-H...O              | 0.320          | 2.46         | C-H... $\pi$         | 0.188          | 2.94        |
| C-H...O              | 0.424          | 2.47        | C-H...O              | 0.373          | 2.45        | C-H...N              | 0.296          | 3.23         | C-H... $\pi$         | 0.181          | 3.17        |
| C-H... $\pi$         | 0.349          | 2.55        | C-H...O              | 0.343          | 2.49        | C-H...N              | 0.205          | 2.70         | C-H... $\pi$         | 0.163          | 3.00        |
| C-H... $\pi$         | 0.269          | 2.73        | $\pi$ ... $\pi$      | 0.198          | 3.38        | LP... $\pi$          | 0.186          | 2.86         | C-H... $\pi$         | 0.159          | 2.94        |
| C-H...O              | 0.257          | 2.68        | C-H... $\pi$         | 0.173          | 3.05        | C-H... $\pi$         | 0.157          | 2.93         | N-H... $\pi$         | 0.152          | 3.00        |
| C-H... $\pi$         | 0.232          | 2.68        | C-H... $\pi$         | 0.158          | 2.96        | C-H... $\pi$         | 0.121          | 2.75         | C-H... $\pi$         | 0.144          | 3.10        |
| C-H... $\pi$         | 0.232          | 2.75        | C-H... $\pi$         | 0.147          | 3.37        | —                    | —              | —            | LP... $\pi$          | 0.127          | 3.48        |
| C-H... $\pi$         | 0.171          | 3.16        | —                    | —              | —           | —                    | —              | C-H... $\pi$ | 0.120                | 3.20           |             |

## Part 5: Comparison of different configurations of TS5s

To ensure the selected configuration of the stereochemical transition state with the lowest energy, we have searched multiple possible conformations in the fifth step. By rotating the dihedral angle  $\Phi(\text{N}-\text{C}-\text{C}'-\text{N}')$  depicted in Figs. S4-7 with  $90^\circ$  per time in stereo-controlling transition states **TS5RR**, **TS5RS**, **TS5SR**, and **TS5SS**, we have totally constructed  $4 \times 4 = 16$  conformations as the initial structures. Subsequently, B3LYP-D3 in conjunction with the standard 6-31G(d,p) basis set was employed for all geometry optimizations and (free) energy calculations. After the optimization, the corresponding dihedral  $\Phi$  angles change to  $50^\circ/25^\circ/-124^\circ/-176^\circ$ ,  $-72^\circ/-60^\circ/-167^\circ/77^\circ$ ,  $3^\circ/-135^\circ/-130^\circ/171^\circ$  and  $5^\circ/-8^\circ/171^\circ/-40^\circ$  in the **TS5RRs**, **TS5RSs**, **TS5SRs**, and **TS5SSs**, respectively. As revealed by Figs. S5-8, the most stable conformations with the lowest energies of the four diastereoselective transition states (denoted as **TS5RR**, **TS5RS**, **TS5SR**, and **TS5SS**) are associated with the dihedral angles  $\Phi(\text{N}-\text{C}-\text{C}'-\text{N}')$  of  $50^\circ/-72^\circ/3^\circ/6^\circ$ , separately.

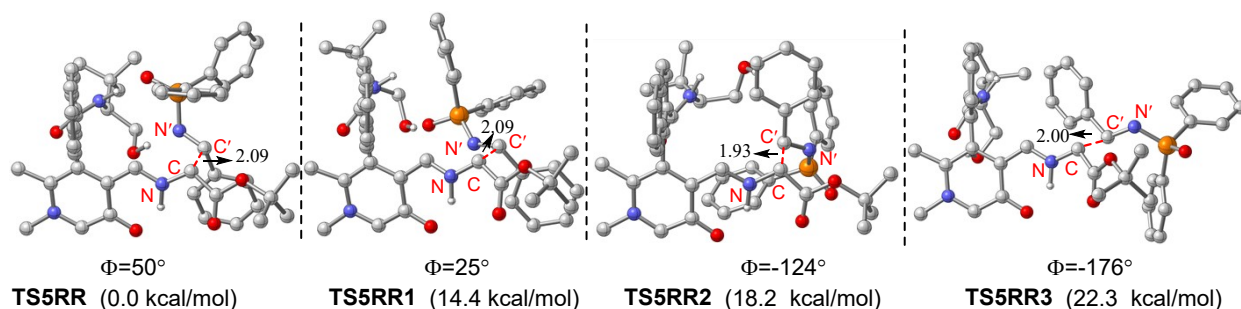

**Fig. S4** Different configurations of the transition states **TS5RRs** with different dihedral  $\Phi(\text{N}-\text{C}-\text{C}'-\text{N}')$  angles (distance in Å).

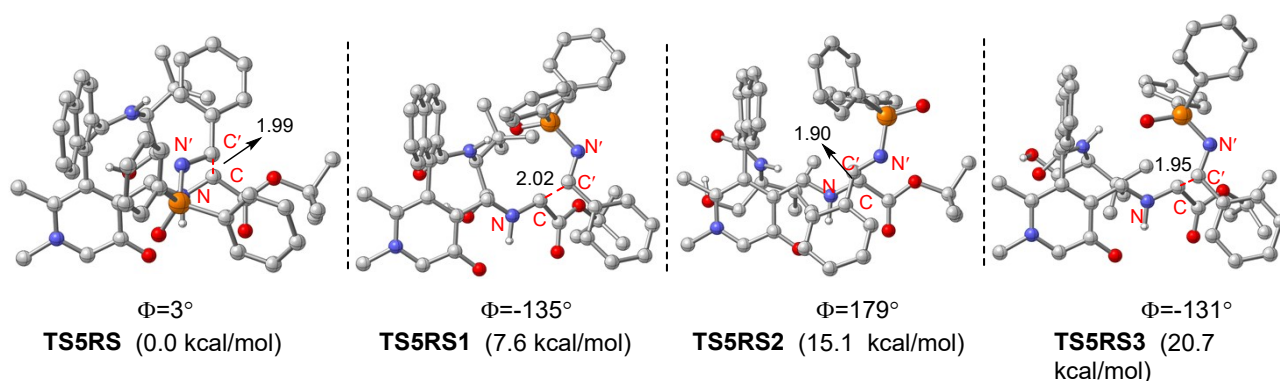

**Fig. S5** Different configurations of the transition states **TS5RSs** with different dihedral  $\Phi(\text{N}-\text{C}-\text{C}'-\text{N}')$  angles (distance in Å).



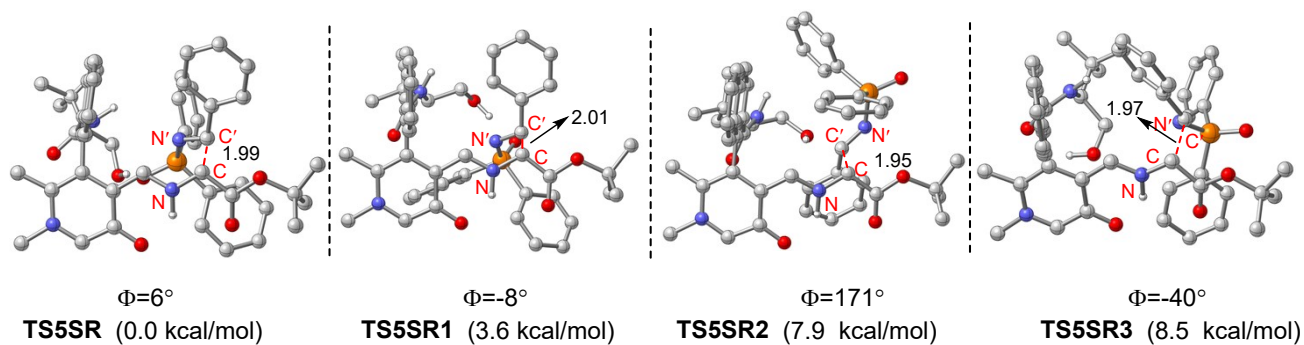

**Fig. S6** Different configurations of the transition states **TS5SRs** with different dihedral  $\Phi(\text{N}-\text{C}-\text{C}'-\text{N}')$  angles (distance in Å).

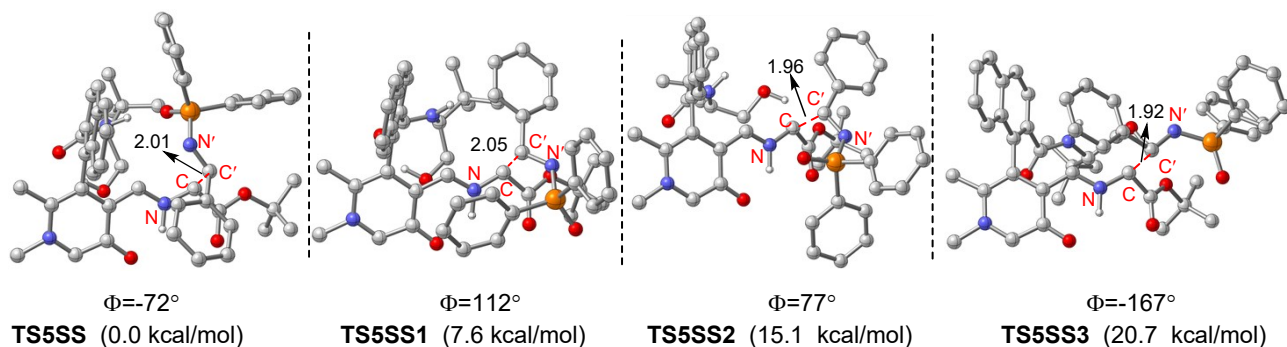

**Fig. S7** Different configurations of the transition states **TS5SSs** with different dihedral  $\Phi(\text{N}-\text{C}-\text{C}'-\text{N}')$  angles (distance in Å).

## Part 6: The Cartesian coordinates of all the stationary points

### R1

Zero-point correction= 0.192133

Thermal correction to Energy= 0.203037

Thermal correction to Enthalpy= 0.203981

Thermal correction to Gibbs Free Energy= 0.156340

Sum of electronic and zero-point Energies= -441.534489

Sum of electronic and thermal Energies= -441.523585

Sum of electronic and thermal Enthalpies= -441.522641

Sum of electronic and thermal Free Energies= -441.570282

Cartesian coordinates

|   |           |           |           |
|---|-----------|-----------|-----------|
| C | 0.974546  | -0.088806 | -0.027666 |
| O | 1.020761  | -1.305382 | -0.053681 |
| O | -0.134624 | 0.659410  | 0.023201  |
| C | 2.204729  | 0.801151  | -0.104955 |
| H | 2.190278  | 1.244166  | -1.116817 |
| H | 2.076285  | 1.634059  | 0.594054  |
| N | 3.407232  | 0.041670  | 0.225498  |
| H | 3.422640  | -0.799215 | -0.347935 |
| H | 4.224369  | 0.585403  | -0.040440 |
| C | -1.490085 | 0.060427  | 0.012505  |
| C | -2.395481 | 1.290773  | 0.058374  |
| H | -2.218484 | 1.930319  | -0.810910 |
| H | -3.443971 | 0.980462  | 0.055354  |
| H | -2.206833 | 1.873182  | 0.964590  |
| C | -1.697756 | -0.723370 | -1.284929 |
| H | -1.492421 | -0.084414 | -2.148998 |
| H | -1.047531 | -1.597320 | -1.326744 |
| H | -2.738580 | -1.055501 | -1.343461 |
| C | -1.679075 | -0.805412 | 1.259775  |
| H | -1.031106 | -1.681517 | 1.232986  |
| H | -1.455500 | -0.224641 | 2.159580  |
| H | -2.720131 | -1.137481 | 1.315471  |

#### Vibrational frequencies

|          |          |          |
|----------|----------|----------|
| 67.7256  | 81.7137  | 124.1329 |
| 155.5106 | 212.1451 | 219.0605 |
| 258.6689 | 290.6835 | 296.1926 |
| 324.6220 | 352.0809 | 364.5025 |
| 437.3030 | 462.4889 | 500.5331 |
| 590.3930 | 702.4615 | 759.1393 |
| 855.1243 | 896.6366 | 928.1791 |

|           |           |           |
|-----------|-----------|-----------|
| 936.7461  | 941.1431  | 981.4900  |
| 1035.4710 | 1062.6603 | 1067.8688 |
| 1110.1887 | 1182.8827 | 1202.4356 |
| 1272.5362 | 1277.7015 | 1290.8620 |
| 1302.2678 | 1410.3720 | 1415.4104 |
| 1437.8661 | 1444.8388 | 1479.9216 |
| 1495.0157 | 1495.3768 | 1496.7058 |
| 1502.8468 | 1512.2614 | 1533.0656 |
| 1642.1648 | 1784.4982 | 2960.8604 |
| 3052.0268 | 3054.7067 | 3060.7166 |
| 3085.8507 | 3124.4916 | 3126.0515 |
| 3132.5426 | 3137.4191 | 3163.5588 |
| 3166.6532 | 3497.0219 | 3581.0318 |

## R2

Zero-point correction= 0.300788

Thermal correction to Energy= 0.319548

Thermal correction to Enthalpy= 0.320492

Thermal correction to Gibbs Free Energy= 0.250268

Sum of electronic and zero-point Energies= -1204.788125

Sum of electronic and thermal Energies= -1204.769365

Sum of electronic and thermal Enthalpies= -1204.768421

Sum of electronic and thermal Free Energies= -1204.838645

## Cartesian coordinates

|   |           |           |           |
|---|-----------|-----------|-----------|
| P | -0.934097 | -0.030906 | 1.085269  |
| O | -1.283231 | 0.062371  | 2.546829  |
| C | -1.848980 | -1.328165 | 0.204151  |
| C | -3.127802 | -1.663940 | 0.671980  |
| C | -1.333630 | -1.970108 | -0.931891 |
| C | -3.886996 | -2.625135 | 0.004092  |

|   |           |           |           |
|---|-----------|-----------|-----------|
| H | -3.517305 | -1.179205 | 1.561851  |
| C | -2.097545 | -2.928466 | -1.599122 |
| H | -0.336040 | -1.731867 | -1.287402 |
| C | -3.373802 | -3.254617 | -1.132986 |
| H | -4.875253 | -2.884494 | 0.371276  |
| H | -1.694923 | -3.424037 | -2.477154 |
| H | -3.965565 | -4.002396 | -1.652294 |
| C | -1.268061 | 1.535025  | 0.211892  |
| C | -1.355752 | 1.609721  | -1.187454 |
| C | -1.399614 | 2.703102  | 0.976991  |
| C | -1.571195 | 2.839155  | -1.809977 |
| H | -1.267575 | 0.711221  | -1.790970 |
| C | -1.617217 | 3.931033  | 0.350870  |
| H | -1.340610 | 2.637963  | 2.058625  |
| C | -1.701355 | 3.999693  | -1.041797 |
| H | -1.640862 | 2.891269  | -2.892131 |
| H | -1.722976 | 4.831436  | 0.948272  |
| H | -1.871467 | 4.955207  | -1.528736 |
| N | 0.687649  | -0.490401 | 0.829683  |
| C | 1.550637  | 0.267012  | 0.252961  |
| H | 1.284342  | 1.253671  | -0.150699 |
| C | 2.952189  | -0.117779 | 0.071171  |
| C | 3.439179  | -1.361429 | 0.513342  |
| C | 3.823574  | 0.780129  | -0.567161 |
| C | 4.774438  | -1.694999 | 0.318010  |
| H | 2.756722  | -2.047705 | 1.003393  |
| C | 5.162292  | 0.443259  | -0.761042 |
| H | 3.447473  | 1.740642  | -0.909217 |
| C | 5.637541  | -0.793687 | -0.319126 |
| H | 5.148847  | -2.655219 | 0.658883  |
| H | 5.831835  | 1.140500  | -1.254442 |

|   |          |           |           |
|---|----------|-----------|-----------|
| H | 6.679718 | -1.058389 | -0.470120 |
|---|----------|-----------|-----------|

Vibrational frequencies

|           |           |           |
|-----------|-----------|-----------|
| 19.1187   | 27.5002   | 30.8451   |
| 36.0757   | 45.1992   | 59.0480   |
| 100.5547  | 116.6679  | 166.8477  |
| 179.3673  | 195.7079  | 242.9288  |
| 250.9887  | 274.2935  | 298.1749  |
| 316.4935  | 372.1868  | 409.0791  |
| 409.5562  | 415.6094  | 420.7007  |
| 455.7787  | 471.7966  | 510.2360  |
| 529.3528  | 553.8650  | 621.9859  |
| 628.9230  | 629.2113  | 630.8296  |
| 701.5209  | 703.1126  | 710.0360  |
| 710.7729  | 733.7177  | 763.6541  |
| 767.1581  | 776.0722  | 817.5128  |
| 865.5921  | 866.9987  | 870.9206  |
| 873.6221  | 947.8827  | 948.9534  |
| 950.4913  | 991.0333  | 992.5663  |
| 993.1450  | 1011.6966 | 1012.6688 |
| 1013.1789 | 1016.2563 | 1016.4128 |
| 1017.3081 | 1038.5677 | 1049.8577 |
| 1050.0860 | 1051.1319 | 1105.7580 |
| 1106.7426 | 1113.3661 | 1120.7794 |
| 1134.4736 | 1192.8497 | 1193.7855 |
| 1194.0204 | 1198.1717 | 1204.3049 |
| 1211.5241 | 1215.4571 | 1255.9817 |
| 1327.7758 | 1330.6370 | 1340.8449 |
| 1359.0759 | 1361.8754 | 1367.1492 |
| 1434.5180 | 1474.0058 | 1476.3092 |
| 1492.1986 | 1524.2703 | 1524.7917 |

|           |           |           |
|-----------|-----------|-----------|
| 1534.5738 | 1625.3953 | 1626.3232 |
| 1628.3762 | 1644.0143 | 1645.0472 |
| 1651.1642 | 1682.5072 | 3042.1306 |
| 3184.1152 | 3185.8024 | 3186.4996 |
| 3191.6581 | 3192.1631 | 3193.5774 |
| 3200.0170 | 3200.2654 | 3201.9284 |
| 3207.1791 | 3207.9783 | 3211.9631 |
| 3213.9358 | 3214.3109 | 3218.0660 |

### **(R,S)-Cat**

Zero-point correction= 0.503657

Thermal correction to Energy= 0.532775

Thermal correction to Enthalpy= 0.533720

Thermal correction to Gibbs Free Energy= 0.445348

Sum of electronic and zero-point Energies= -1380.023824

Sum of electronic and thermal Energies= -1379.994706

Sum of electronic and thermal Enthalpies= -1379.993761

Sum of electronic and thermal Free Energies= -1380.082133

### Cartesian coordinates

|   |          |           |           |
|---|----------|-----------|-----------|
| C | 0.803204 | -3.571001 | -0.350331 |
| C | 0.162701 | -2.681642 | -1.209509 |
| C | 0.405866 | -1.297321 | -1.041462 |
| C | 1.235026 | -0.864794 | 0.007419  |
| C | 1.839144 | -1.798559 | 0.863189  |
| N | 1.607405 | -3.123933 | 0.635187  |
| H | 0.662833 | -4.637595 | -0.450206 |
| C | 1.429191 | 0.598462  | 0.251822  |
| C | 2.628594 | 1.246579  | -0.173010 |
| C | 0.415297 | 1.325765  | 0.862465  |
| C | 3.683408 | 0.554727  | -0.830285 |

|   |           |           |           |
|---|-----------|-----------|-----------|
| C | 2.773614  | 2.652792  | 0.073201  |
| C | 0.563448  | 2.717933  | 1.083441  |
| C | 4.829503  | 1.217985  | -1.207206 |
| H | 3.580568  | -0.504667 | -1.039125 |
| C | 3.969591  | 3.304558  | -0.330875 |
| C | 1.719047  | 3.360118  | 0.707028  |
| H | -0.234187 | 3.265397  | 1.574988  |
| C | 4.976799  | 2.603922  | -0.954495 |
| H | 5.627076  | 0.675764  | -1.705024 |
| H | 4.072844  | 4.368559  | -0.139406 |
| H | 1.837849  | 4.423271  | 0.892798  |
| H | 5.886504  | 3.111443  | -1.258960 |
| C | -0.227276 | -0.344110 | -1.977031 |
| O | -0.995638 | -0.710078 | -2.862829 |
| O | -0.636423 | -3.187483 | -2.144091 |
| C | 2.684376  | -1.403774 | 2.034628  |
| H | 2.692566  | -0.321449 | 2.136822  |
| H | 2.289376  | -1.827851 | 2.961844  |
| H | 3.717644  | -1.744680 | 1.917469  |
| C | -0.834149 | 0.599122  | 1.289652  |
| O | -0.757975 | -0.437170 | 1.970139  |
| N | -1.975029 | 1.126651  | 0.803295  |
| H | -1.866378 | 1.967633  | 0.255174  |
| C | -3.361439 | 0.659131  | 0.986415  |
| C | -3.425047 | -0.882913 | 1.145607  |
| H | -3.181151 | -1.132119 | 2.181864  |
| H | -4.449211 | -1.211452 | 0.960356  |
| O | -2.575790 | -1.600693 | 0.256792  |
| H | -1.722990 | -1.612600 | 0.720042  |
| C | -4.258701 | 1.243837  | -0.155444 |
| C | -5.734032 | 0.908021  | 0.147293  |

|   |           |           |           |
|---|-----------|-----------|-----------|
| H | -5.939628 | -0.163593 | 0.084485  |
| H | -6.027151 | 1.254927  | 1.144370  |
| H | -6.380954 | 1.402971  | -0.583324 |
| C | -3.870188 | 0.668746  | -1.529040 |
| H | -4.531855 | 1.072562  | -2.302529 |
| H | -2.844018 | 0.929010  | -1.801421 |
| H | -3.945253 | -0.420901 | -1.541909 |
| C | -4.138622 | 2.785064  | -0.186355 |
| H | -3.156276 | 3.137977  | -0.520303 |
| H | -4.863759 | 3.197316  | -0.894406 |
| H | -4.341156 | 3.221334  | 0.797713  |
| C | 2.231057  | -4.137792 | 1.520621  |
| H | 2.007411  | -5.127562 | 1.132341  |
| H | 3.309270  | -3.986721 | 1.538713  |
| H | 1.821393  | -4.035482 | 2.525804  |
| H | 0.030252  | 0.717857  | -1.862339 |
| H | -3.738711 | 1.082162  | 1.928905  |
| H | -1.015397 | -2.426278 | -2.650627 |

#### Vibrational frequencies

|          |          |          |
|----------|----------|----------|
| 34.2960  | 35.8302  | 42.7676  |
| 47.3688  | 51.9621  | 59.4142  |
| 62.9551  | 101.1639 | 111.0943 |
| 116.4650 | 126.3868 | 133.5580 |
| 144.3637 | 156.7941 | 183.3516 |
| 192.9345 | 207.0396 | 209.7680 |
| 228.6140 | 232.6868 | 251.9040 |
| 258.3712 | 261.2989 | 276.8394 |
| 287.7435 | 290.1568 | 298.3816 |
| 318.5535 | 327.3761 | 334.6036 |
| 359.1900 | 367.1189 | 382.5651 |



|           |           |           |
|-----------|-----------|-----------|
| 385.8870  | 393.2034  | 407.4663  |
| 413.3374  | 418.6441  | 438.3447  |
| 461.6023  | 478.4262  | 488.6993  |
| 497.2784  | 531.3486  | 541.8872  |
| 548.5503  | 576.5714  | 588.5402  |
| 602.2451  | 610.0133  | 632.2464  |
| 643.9567  | 654.4319  | 662.7834  |
| 693.2148  | 708.2253  | 739.1462  |
| 752.4186  | 761.3060  | 768.8162  |
| 777.2263  | 794.5253  | 798.8798  |
| 809.7719  | 842.1892  | 847.7403  |
| 853.1141  | 878.7809  | 884.4428  |
| 891.0119  | 898.3022  | 907.8354  |
| 940.9663  | 946.1777  | 961.6360  |
| 973.4666  | 974.3629  | 990.4291  |
| 1009.4498 | 1011.3205 | 1021.7866 |
| 1029.1923 | 1042.6222 | 1054.7306 |
| 1057.7631 | 1062.3338 | 1077.2577 |
| 1083.8151 | 1122.2808 | 1134.3371 |
| 1137.7195 | 1150.3406 | 1183.5858 |
| 1194.5059 | 1205.6794 | 1217.9789 |
| 1222.2692 | 1246.6919 | 1247.9761 |
| 1250.1487 | 1251.4806 | 1278.4384 |
| 1287.3611 | 1294.6499 | 1316.4021 |
| 1324.7176 | 1340.5446 | 1355.5293 |
| 1362.0462 | 1378.0823 | 1387.1013 |
| 1408.8546 | 1415.2129 | 1422.8619 |
| 1423.0620 | 1426.4339 | 1427.3215 |
| 1433.5437 | 1436.4335 | 1452.6376 |
| 1460.0442 | 1468.9381 | 1471.4577 |
| 1479.2092 | 1485.9195 | 1493.2589 |

|           |           |           |
|-----------|-----------|-----------|
| 1496.0323 | 1497.7863 | 1504.1293 |
| 1506.0223 | 1508.8347 | 1516.6073 |
| 1521.3549 | 1523.5731 | 1529.9466 |
| 1533.5423 | 1554.8659 | 1576.5513 |
| 1610.0478 | 1611.3149 | 1643.0425 |
| 1671.3032 | 1674.0014 | 1702.9814 |
| 1740.0464 | 3008.1784 | 3034.0511 |
| 3043.5144 | 3053.2772 | 3065.6811 |
| 3068.2728 | 3075.0782 | 3097.9962 |
| 3100.4787 | 3112.5538 | 3117.7763 |
| 3121.7125 | 3124.3006 | 3128.4714 |
| 3136.5402 | 3142.9084 | 3190.0665 |
| 3190.1063 | 3193.8800 | 3194.9274 |
| 3197.3066 | 3208.2178 | 3211.3782 |
| 3214.6672 | 3217.3894 | 3270.7726 |
| 3364.1250 | 3636.1320 | 3730.3195 |

### **(R,S)-Cat**

Zero-point correction= 0.461253

Thermal correction to Energy= 0.488950

Thermal correction to Enthalpy= 0.489894

Thermal correction to Gibbs Free Energy= 0.404259

Sum of electronic and zero-point Energies= -1340.304582

Sum of electronic and thermal Energies= -1340.276885

Sum of electronic and thermal Enthalpies= -1340.275941

Sum of electronic and thermal Free Energies= -1340.361576

### Cartesian coordinates

|   |          |          |           |
|---|----------|----------|-----------|
| C | 0.596844 | 3.807207 | -0.277385 |
| C | 0.044569 | 3.018641 | 0.742258  |
| C | 0.383637 | 1.644616 | 0.771203  |

|   |           |           |           |
|---|-----------|-----------|-----------|
| C | 1.228300  | 1.133530  | -0.239419 |
| C | 1.715110  | 2.008307  | -1.223235 |
| N | 1.399520  | 3.318158  | -1.219596 |
| H | 0.355829  | 4.867125  | -0.311547 |
| C | 1.546836  | -0.325913 | -0.300828 |
| C | 2.809370  | -0.812847 | 0.161036  |
| C | 0.599585  | -1.220084 | -0.783733 |
| C | 3.807874  | 0.049805  | 0.693736  |
| C | 3.082549  | -2.219495 | 0.092172  |
| C | 0.870331  | -2.611582 | -0.828601 |
| C | 5.018247  | -0.450527 | 1.118508  |
| H | 3.604867  | 1.113269  | 0.761639  |
| C | 4.342060  | -2.701910 | 0.540878  |
| C | 2.086590  | -3.096793 | -0.411298 |
| H | 0.112360  | -3.286374 | -1.214020 |
| C | 5.290410  | -1.838701 | 1.040674  |
| H | 5.770298  | 0.222300  | 1.518740  |
| H | 4.541397  | -3.768278 | 0.483989  |
| H | 2.298287  | -4.160890 | -0.460272 |
| H | 6.248907  | -2.218548 | 1.380428  |
| C | -0.149457 | 0.795202  | 1.838047  |
| O | -0.923271 | 1.205952  | 2.707758  |
| O | -0.772089 | 3.591057  | 1.640088  |
| C | 2.561474  | 1.505387  | -2.363265 |
| H | 2.000168  | 0.765138  | -2.943346 |
| H | 2.834317  | 2.336824  | -3.014745 |
| H | 3.474392  | 1.018886  | -2.006148 |
| C | -0.723763 | -0.689666 | -1.272801 |
| O | -0.780433 | 0.185460  | -2.149083 |
| N | -1.795867 | -1.206760 | -0.635726 |
| H | -1.594681 | -1.900259 | 0.068877  |

|   |           |           |           |
|---|-----------|-----------|-----------|
| C | -3.217502 | -0.900967 | -0.863963 |
| C | -3.422324 | 0.596459  | -1.222596 |
| H | -3.212463 | 0.727175  | -2.287302 |
| H | -4.469804 | 0.856650  | -1.056966 |
| O | -2.636954 | 1.495240  | -0.450256 |
| H | -1.776520 | 1.520096  | -0.896261 |
| C | -4.059459 | -1.406862 | 0.354096  |
| C | -5.558648 | -1.282678 | 0.010654  |
| H | -5.876678 | -0.243434 | -0.105352 |
| H | -5.802137 | -1.819048 | -0.913293 |
| H | -6.158388 | -1.715005 | 0.817545  |
| C | -3.753237 | -0.596609 | 1.626720  |
| H | -4.356946 | -0.970005 | 2.460790  |
| H | -2.701349 | -0.671648 | 1.914863  |
| H | -3.974776 | 0.463967  | 1.486799  |
| C | -3.775422 | -2.904738 | 0.611091  |
| H | -2.767487 | -3.096388 | 0.996038  |
| H | -4.466825 | -3.286869 | 1.368269  |
| H | -3.909494 | -3.498010 | -0.299977 |
| H | 0.182000  | -0.254361 | 1.852730  |
| H | -3.553646 | -1.477361 | -1.738619 |
| H | -1.069066 | 2.874905  | 2.252653  |

#### Vibrational frequencies

|          |          |          |
|----------|----------|----------|
| 32.9440  | 33.9070  | 42.1250  |
| 52.3704  | 54.8891  | 61.9911  |
| 74.9766  | 102.0935 | 108.9247 |
| 114.2789 | 135.6156 | 142.0001 |
| 153.5892 | 159.9712 | 166.6340 |
| 201.8997 | 206.2349 | 233.1750 |
| 237.8415 | 253.2168 | 259.7108 |

|           |           |           |
|-----------|-----------|-----------|
| 272.7403  | 280.5235  | 284.9299  |
| 296.7172  | 319.2246  | 327.3448  |
| 329.9772  | 350.4014  | 364.2700  |
| 370.4871  | 383.7948  | 408.3050  |
| 415.7710  | 429.2542  | 449.3932  |
| 461.4917  | 475.6576  | 480.1878  |
| 496.1147  | 513.3471  | 534.1053  |
| 541.9142  | 559.3341  | 566.0011  |
| 573.8049  | 593.1480  | 606.3605  |
| 652.7938  | 661.7114  | 688.9738  |
| 706.3260  | 716.9230  | 745.4288  |
| 750.3238  | 764.2912  | 772.7909  |
| 777.0195  | 796.7148  | 801.8800  |
| 817.3137  | 841.8409  | 846.4591  |
| 851.6521  | 888.9072  | 896.6603  |
| 907.4207  | 916.3969  | 942.0629  |
| 946.8021  | 949.0582  | 968.8867  |
| 972.6724  | 979.0683  | 984.2401  |
| 1007.7617 | 1011.1216 | 1023.0399 |
| 1033.2438 | 1042.0728 | 1054.9226 |
| 1060.7521 | 1062.9881 | 1082.1397 |
| 1106.5259 | 1127.1579 | 1179.3098 |
| 1189.6340 | 1197.0053 | 1211.8646 |
| 1219.8976 | 1228.5566 | 1244.7591 |
| 1246.2184 | 1247.5950 | 1277.1322 |
| 1282.8133 | 1290.9180 | 1307.1113 |
| 1318.7627 | 1341.6973 | 1345.4135 |
| 1352.7461 | 1370.3314 | 1381.0401 |
| 1407.9069 | 1411.6985 | 1415.0572 |
| 1418.7891 | 1422.8001 | 1424.4714 |
| 1427.9670 | 1433.5562 | 1454.1808 |

|           |           |           |
|-----------|-----------|-----------|
| 1465.3301 | 1472.3364 | 1476.8248 |
| 1488.1207 | 1490.3373 | 1492.5475 |
| 1499.2580 | 1502.4269 | 1503.6685 |
| 1508.6352 | 1514.7997 | 1523.0913 |
| 1532.5575 | 1553.5985 | 1566.3642 |
| 1600.5426 | 1610.5310 | 1635.2359 |
| 1643.8241 | 1672.0003 | 1710.4491 |
| 1720.5646 | 3005.6425 | 3034.4248 |
| 3037.2389 | 3042.5635 | 3049.8572 |
| 3051.8409 | 3076.5077 | 3098.1408 |
| 3111.3419 | 3112.7145 | 3116.3835 |
| 3120.3213 | 3123.4245 | 3132.5315 |
| 3141.0031 | 3154.0451 | 3178.3506 |
| 3185.1367 | 3188.9382 | 3194.0270 |
| 3205.3371 | 3205.8720 | 3214.7260 |
| 3384.3200 | 3642.2789 | 3758.2613 |

### **HCO<sub>3</sub><sup>-</sup>**

Zero-point correction= 0.026274

Thermal correction to Energy= 0.029799

Thermal correction to Enthalpy= 0.030744

Thermal correction to Gibbs Free Energy= 0.000502

Sum of electronic and zero-point Energies= -264.509353

Sum of electronic and thermal Energies= -264.505828

Sum of electronic and thermal Enthalpies= -264.504883

Sum of electronic and thermal Free Energies= -264.535125

### Cartesian coordinates

|   |           |           |          |
|---|-----------|-----------|----------|
| C | -1.497122 | 0.018185  | 0.000000 |
| O | -0.810971 | -1.229655 | 0.000000 |
| O | -2.739632 | -0.088994 | 0.000000 |
| O | -0.758821 | 1.032415  | 0.000000 |

|   |          |           |          |
|---|----------|-----------|----------|
| H | 0.125423 | -0.983614 | 0.000000 |
|---|----------|-----------|----------|

Vibrational frequencies

|           |           |           |
|-----------|-----------|-----------|
| 521.4981  | 548.3324  | 648.1934  |
| 804.7084  | 905.8982  | 1192.8216 |
| 1336.0166 | 1784.4817 | 3790.9358 |

## **H<sub>2</sub>O**

Zero-point correction= 0.021323

Thermal correction to Energy= 0.024158

Thermal correction to Enthalpy= 0.025102

Thermal correction to Gibbs Free Energy= 0.003007

Sum of electronic and zero-point Energies= -76.405295

Sum of electronic and thermal Energies= -76.402460

Sum of electronic and thermal Enthalpies= -76.401515

Sum of electronic and thermal Free Energies= -76.423611

Cartesian coordinates

|   |           |           |          |
|---|-----------|-----------|----------|
| O | -0.820261 | -1.200023 | 0.000000 |
| H | 0.081685  | -1.546595 | 0.000000 |
| H | -1.362286 | -1.999958 | 0.000000 |

Vibrational frequencies

|           |           |           |
|-----------|-----------|-----------|
| 1662.7218 | 3799.4666 | 3897.6184 |
|-----------|-----------|-----------|

## **H<sub>2</sub>CO<sub>3</sub>**

Zero-point correction= 0.039581

Thermal correction to Energy= 0.043300

Thermal correction to Enthalpy= 0.044244

Thermal correction to Gibbs Free Energy= 0.013679

Sum of electronic and zero-point Energies= -264.976093

Sum of electronic and thermal Energies= -264.972375

Sum of electronic and thermal Enthalpies= -264.971430

Sum of electronic and thermal Free Energies= -265.001995

Cartesian coordinates

|   |           |           |          |
|---|-----------|-----------|----------|
| C | -1.435725 | 0.018329  | 0.000000 |
| O | -0.847196 | -1.185085 | 0.000000 |
| O | -2.763486 | -0.159917 | 0.000000 |
| O | -0.863624 | 1.088613  | 0.000000 |
| H | 0.111310  | -1.035839 | 0.000000 |
| H | -3.171708 | 0.720298  | 0.000000 |

Vibrational frequencies

|           |           |           |
|-----------|-----------|-----------|
| 508.9189  | 558.7239  | 592.4942  |
| 599.4911  | 781.7170  | 995.4075  |
| 1148.0089 | 1293.4485 | 1476.6894 |
| 1824.0414 | 3795.3449 | 3799.7366 |

TS1

Zero-point correction= 0.699366

Thermal correction to Energy= 0.739070

Thermal correction to Enthalpy= 0.740014

Thermal correction to Gibbs Free Energy= 0.628138

Sum of electronic and zero-point Energies= -1821.593252

Sum of electronic and thermal Energies= -1821.553548

Sum of electronic and thermal Enthalpies= -1821.552604

Sum of electronic and thermal Free Energies= -1821.664480

Cartesian coordinates

|   |          |           |          |
|---|----------|-----------|----------|
| C | 4.192984 | 0.570739  | 1.689551 |
| C | 3.016991 | 0.054171  | 2.215990 |
| C | 2.038375 | -0.434258 | 1.318822 |



|   |           |           |           |
|---|-----------|-----------|-----------|
| C | 2.300454  | -0.432038 | -0.052356 |
| C | 3.530222  | 0.047150  | -0.539371 |
| N | 4.419972  | 0.558578  | 0.354229  |
| H | 4.960344  | 0.983638  | 2.328359  |
| C | 1.263176  | -0.924385 | -1.015938 |
| C | 1.105848  | -2.331148 | -1.226075 |
| C | 0.417435  | -0.028828 | -1.657663 |
| C | 1.926672  | -3.296422 | -0.578744 |
| C | 0.074437  | -2.790136 | -2.110785 |
| C | -0.596439 | -0.496381 | -2.533002 |
| C | 1.728096  | -4.643006 | -0.787794 |
| H | 2.716685  | -2.964979 | 0.086103  |
| C | -0.101162 | -4.186213 | -2.304790 |
| C | -0.755859 | -1.840203 | -2.761297 |
| H | -1.243202 | 0.223827  | -3.022356 |
| C | 0.704325  | -5.094343 | -1.655783 |
| H | 2.362166  | -5.365784 | -0.284154 |
| H | -0.888026 | -4.523439 | -2.973154 |
| H | -1.530637 | -2.193086 | -3.435296 |
| H | 0.558808  | -6.159125 | -1.807782 |
| C | 0.763504  | -0.977496 | 1.935093  |
| O | 0.833373  | -1.401221 | 3.141789  |
| O | 2.827122  | 0.041805  | 3.534773  |
| H | 1.998094  | -0.559657 | 3.655847  |
| C | 3.892434  | 0.035261  | -1.992587 |
| H | 3.157751  | -0.541981 | -2.549983 |
| H | 3.887604  | 1.052031  | -2.394329 |
| H | 4.877775  | -0.407406 | -2.158319 |
| C | 0.547087  | 1.446279  | -1.398256 |
| O | 1.623972  | 2.051193  | -1.521484 |
| N | -0.591297 | 2.046252  | -0.979094 |

|   |           |           |           |
|---|-----------|-----------|-----------|
| H | -1.393922 | 1.454020  | -0.788305 |
| C | -0.650324 | 3.478726  | -0.669932 |
| C | -0.118574 | 3.750093  | 0.759458  |
| H | 0.108170  | 4.819304  | 0.849966  |
| H | -0.877160 | 3.508494  | 1.510685  |
| O | 1.022943  | 2.960061  | 1.091019  |
| H | 1.603245  | 2.932250  | 0.310952  |
| C | -2.073599 | 4.048962  | -0.949046 |
| C | -2.084688 | 5.553450  | -0.611420 |
| H | -1.975678 | 5.734323  | 0.461866  |
| H | -1.279461 | 6.083182  | -1.132124 |
| H | -3.035470 | 5.996268  | -0.924253 |
| C | -3.161307 | 3.336452  | -0.116843 |
| H | -4.134489 | 3.792328  | -0.323829 |
| H | -3.248030 | 2.272170  | -0.357136 |
| H | -2.981398 | 3.422904  | 0.958746  |
| C | -2.388595 | 3.873242  | -2.447650 |
| H | -2.394195 | 2.818501  | -2.737473 |
| H | -3.374486 | 4.289844  | -2.677310 |
| H | -1.649195 | 4.390863  | -3.068378 |
| C | -2.417794 | -0.437639 | 1.314207  |
| O | -2.264980 | -0.087048 | 0.152565  |
| O | -3.267037 | -1.346169 | 1.754019  |
| C | -1.611696 | 0.167739  | 2.456084  |
| H | -2.154140 | 1.039033  | 2.837828  |
| H | -1.482028 | -0.550392 | 3.268273  |
| N | -0.283171 | 0.543418  | 1.956727  |
| H | 0.192051  | 1.190930  | 2.584122  |
| C | -4.152122 | -2.114850 | 0.823074  |
| C | -4.923824 | -3.014291 | 1.784757  |
| H | -5.509706 | -2.415368 | 2.487354  |

|   |           |           |           |
|---|-----------|-----------|-----------|
| H | -5.605930 | -3.654714 | 1.219283  |
| H | -4.237749 | -3.649697 | 2.351209  |
| C | -5.085965 | -1.152346 | 0.090338  |
| H | -5.612839 | -0.515364 | 0.806588  |
| H | -4.539948 | -0.523529 | -0.612947 |
| H | -5.829175 | -1.733406 | -0.463155 |
| C | -3.273586 | -2.932580 | -0.124481 |
| H | -2.709940 | -2.291119 | -0.801525 |
| H | -2.572758 | -3.550742 | 0.444145  |
| H | -3.910152 | -3.594439 | -0.718762 |
| C | 5.700466  | 1.126121  | -0.128726 |
| H | 6.219632  | 1.582584  | 0.709874  |
| H | 6.315450  | 0.330829  | -0.550713 |
| H | 5.498380  | 1.881489  | -0.887179 |
| H | 0.135569  | -1.529975 | 1.221447  |
| H | -0.330270 | 1.009557  | 1.050245  |
| H | 0.044771  | 3.958181  | -1.367909 |

Vibrational frequencies

|           |          |          |
|-----------|----------|----------|
| -146.0402 | 15.6304  | 21.2011  |
| 27.5909   | 34.6261  | 45.9118  |
| 48.2865   | 52.4819  | 53.7113  |
| 56.5296   | 74.4059  | 86.6321  |
| 92.7481   | 112.0717 | 116.8073 |
| 125.2491  | 127.4915 | 130.5261 |
| 144.5864  | 150.5744 | 160.6235 |
| 166.6601  | 174.0304 | 187.4549 |
| 189.8755  | 208.8206 | 216.3557 |
| 223.8738  | 241.9577 | 244.5736 |
| 250.6051  | 252.2756 | 257.0352 |
| 260.0609  | 280.7116 | 283.2363 |

|           |           |           |
|-----------|-----------|-----------|
| 286.9903  | 299.5950  | 303.7053  |
| 317.9947  | 321.1394  | 332.8563  |
| 347.7663  | 354.9517  | 358.2164  |
| 361.3212  | 362.3570  | 370.6667  |
| 373.2608  | 386.5471  | 406.2826  |
| 408.8529  | 410.7443  | 438.5937  |
| 439.4086  | 446.5596  | 456.6246  |
| 462.0030  | 476.9974  | 479.3798  |
| 488.8679  | 503.9216  | 526.1209  |
| 533.6672  | 544.7745  | 552.5184  |
| 570.7943  | 574.5361  | 585.5978  |
| 595.0538  | 599.7680  | 618.3372  |
| 641.2309  | 658.6704  | 666.8823  |
| 681.0466  | 692.0218  | 699.7852  |
| 752.2357  | 759.0775  | 760.9345  |
| 762.6238  | 780.3091  | 786.1988  |
| 798.7384  | 805.9302  | 824.9113  |
| 836.3669  | 849.8146  | 855.9816  |
| 868.6220  | 880.3333  | 891.2169  |
| 901.2036  | 915.4292  | 935.2267  |
| 936.2930  | 940.8093  | 946.3457  |
| 949.2839  | 951.5637  | 972.9053  |
| 979.2956  | 983.1667  | 986.3447  |
| 987.3091  | 1003.3512 | 1008.7812 |
| 1009.6379 | 1020.2110 | 1024.7770 |
| 1050.6636 | 1056.4303 | 1060.5244 |
| 1060.9109 | 1068.0347 | 1074.6134 |
| 1084.3094 | 1086.3800 | 1103.1201 |
| 1125.7676 | 1129.4575 | 1134.9331 |
| 1148.9144 | 1178.7785 | 1183.9988 |
| 1190.9294 | 1192.3156 | 1202.4201 |

|           |           |           |
|-----------|-----------|-----------|
| 1206.4035 | 1213.4579 | 1215.5379 |
| 1242.2572 | 1248.2827 | 1254.8017 |
| 1256.0292 | 1269.5324 | 1277.9667 |
| 1278.2504 | 1279.4938 | 1290.3420 |
| 1294.1892 | 1313.0537 | 1317.8669 |
| 1319.3396 | 1324.6681 | 1346.6419 |
| 1351.4418 | 1360.6906 | 1381.9492 |
| 1395.7357 | 1410.0537 | 1411.2376 |
| 1412.7958 | 1413.8820 | 1415.8453 |
| 1418.1357 | 1419.0987 | 1421.1664 |
| 1425.1979 | 1439.8861 | 1442.9001 |
| 1449.0922 | 1450.4515 | 1467.9415 |
| 1468.6808 | 1471.3581 | 1479.3355 |
| 1479.7975 | 1480.5538 | 1491.9944 |
| 1495.2454 | 1495.3848 | 1495.6691 |
| 1495.7844 | 1499.6568 | 1502.2636 |
| 1502.4240 | 1508.0030 | 1511.5293 |
| 1513.2737 | 1518.5214 | 1524.2531 |
| 1530.0851 | 1531.4886 | 1531.8690 |
| 1536.4618 | 1554.3814 | 1571.4224 |
| 1583.4299 | 1601.0704 | 1613.1372 |
| 1631.5213 | 1647.0808 | 1672.1818 |
| 1679.5248 | 1696.4975 | 1762.7502 |
| 2624.0273 | 3024.8035 | 3037.9229 |
| 3040.3531 | 3042.9855 | 3051.9979 |
| 3055.2921 | 3058.3049 | 3063.7874 |
| 3065.0292 | 3070.3952 | 3076.0061 |
| 3096.7911 | 3100.4987 | 3110.4757 |
| 3113.9087 | 3117.1122 | 3120.6834 |
| 3122.4287 | 3126.4671 | 3129.1166 |
| 3130.3465 | 3136.1758 | 3137.8024 |

|           |           |           |
|-----------|-----------|-----------|
| 3141.3548 | 3144.1772 | 3165.0090 |
| 3170.7464 | 3183.4303 | 3184.3700 |
| 3187.7402 | 3193.0769 | 3197.4417 |
| 3209.4025 | 3209.6424 | 3213.5177 |
| 3218.8397 | 3266.9993 | 3482.1548 |
| 3542.1303 | 3562.1632 | 3699.7657 |

## M1

Zero-point correction= 0.701275

Thermal correction to Energy= 0.741591

Thermal correction to Enthalpy= 0.742535

Thermal correction to Gibbs Free Energy= 0.627788

Sum of electronic and zero-point Energies= -1821.595071

Sum of electronic and thermal Energies= -1821.554756

Sum of electronic and thermal Enthalpies= -1821.553811

Sum of electronic and thermal Free Energies= -1821.668558

## Cartesian coordinates

|   |           |           |           |
|---|-----------|-----------|-----------|
| C | 2.334236  | 2.960649  | -2.029088 |
| C | 1.000376  | 2.607935  | -2.358777 |
| C | 0.250293  | 2.029564  | -1.284465 |
| C | 0.822465  | 1.790795  | -0.039777 |
| C | 2.151100  | 2.172644  | 0.219144  |
| N | 2.855447  | 2.744057  | -0.804004 |
| H | 2.981834  | 3.400135  | -2.774946 |
| C | 0.041608  | 1.069827  | 1.016495  |
| C | -0.865769 | 1.781565  | 1.859454  |
| C | 0.207314  | -0.295773 | 1.181320  |
| C | -1.082880 | 3.181966  | 1.733671  |
| C | -1.595515 | 1.056583  | 2.860279  |
| C | -0.487091 | -0.999479 | 2.198022  |

|   |           |           |           |
|---|-----------|-----------|-----------|
| C | -1.986664 | 3.828604  | 2.546784  |
| H | -0.533270 | 3.738435  | 0.982119  |
| C | -2.518117 | 1.757285  | 3.682838  |
| C | -1.374281 | -0.338062 | 3.010688  |
| H | -0.326729 | -2.068692 | 2.296997  |
| C | -2.712317 | 3.111468  | 3.529466  |
| H | -2.145548 | 4.896575  | 2.435123  |
| H | -3.068752 | 1.202279  | 4.436922  |
| H | -1.923394 | -0.877360 | 3.776728  |
| H | -3.421490 | 3.635505  | 4.162474  |
| C | -1.155417 | 1.590429  | -1.627458 |
| O | -1.834137 | 2.468961  | -2.445410 |
| O | 0.508568  | 2.761799  | -3.531911 |
| H | -1.142207 | 2.768982  | -3.100081 |
| C | 2.823198  | 1.984007  | 1.549283  |
| H | 2.120893  | 1.548660  | 2.257387  |
| H | 3.687573  | 1.315314  | 1.481903  |
| H | 3.172041  | 2.934945  | 1.963662  |
| C | 1.093787  | -1.075317 | 0.255960  |
| O | 0.915590  | -1.101715 | -0.978224 |
| N | 2.092129  | -1.744489 | 0.852963  |
| H | 2.151480  | -1.685650 | 1.860594  |
| C | 2.946949  | -2.720568 | 0.176346  |
| C | 2.851559  | -4.044693 | 0.956962  |
| H | 3.398696  | -4.827287 | 0.418479  |
| H | 3.307225  | -3.942027 | 1.946826  |
| O | 1.498947  | -4.422924 | 1.194587  |
| H | 1.079320  | -4.578313 | 0.336748  |
| C | 4.387034  | -2.166404 | -0.057841 |
| C | 5.233650  | -3.227316 | -0.787570 |
| H | 5.443726  | -4.093656 | -0.153561 |

|   |           |           |           |
|---|-----------|-----------|-----------|
| H | 4.730359  | -3.580846 | -1.694437 |
| H | 6.195544  | -2.797188 | -1.084270 |
| C | 5.068270  | -1.785049 | 1.270175  |
| H | 6.062395  | -1.371259 | 1.073291  |
| H | 4.497486  | -1.023786 | 1.812332  |
| H | 5.196541  | -2.648654 | 1.929936  |
| C | 4.286424  | -0.913766 | -0.951995 |
| H | 3.674444  | -0.137762 | -0.484205 |
| H | 5.283307  | -0.498068 | -1.131676 |
| H | 3.834676  | -1.150851 | -1.920234 |
| C | -2.916330 | -0.996622 | -1.438556 |
| O | -2.332962 | -1.003059 | -0.370850 |
| O | -4.124890 | -1.467655 | -1.701335 |
| C | -2.296060 | -0.410699 | -2.700327 |
| H | -2.123484 | -1.203612 | -3.430681 |
| H | -2.951123 | 0.340237  | -3.144579 |
| N | -1.000687 | 0.232304  | -2.361331 |
| H | -0.485415 | 0.443687  | -3.222579 |
| C | -4.965973 | -2.088872 | -0.632182 |
| C | -6.235860 | -2.459261 | -1.393812 |
| H | -6.009572 | -3.158928 | -2.202973 |
| H | -6.947462 | -2.932873 | -0.712415 |
| H | -6.702676 | -1.567633 | -1.821114 |
| C | -4.258311 | -3.330804 | -0.090853 |
| H | -4.003361 | -4.010022 | -0.909409 |
| H | -3.349278 | -3.064840 | 0.448714  |
| H | -4.932555 | -3.854527 | 0.592949  |
| C | -5.250012 | -1.048703 | 0.452113  |
| H | -4.344263 | -0.783054 | 0.997831  |
| H | -5.678161 | -0.145368 | 0.008353  |
| H | -5.976225 | -1.461652 | 1.158236  |



|   |           |           |           |
|---|-----------|-----------|-----------|
| C | 4.265932  | 3.134853  | -0.578711 |
| H | 4.667428  | 3.546961  | -1.500714 |
| H | 4.316860  | 3.886621  | 0.208876  |
| H | 4.844612  | 2.256935  | -0.291165 |
| H | -1.752952 | 1.369763  | -0.744642 |
| H | -0.380702 | -0.390520 | -1.768802 |
| H | 2.493441  | -2.877700 | -0.807787 |

Vibrational frequencies

|          |          |          |
|----------|----------|----------|
| 13.7854  | 23.1432  | 24.3112  |
| 31.6821  | 34.8381  | 40.7974  |
| 43.5856  | 49.2055  | 60.3176  |
| 66.1922  | 68.3856  | 76.7529  |
| 88.3720  | 100.4323 | 106.7396 |
| 115.6136 | 119.1857 | 124.1317 |
| 135.3117 | 146.3397 | 148.2193 |
| 167.7826 | 180.1110 | 191.8681 |
| 211.7616 | 219.8861 | 231.0822 |
| 233.6842 | 244.6352 | 246.8889 |
| 251.6672 | 265.6605 | 274.5902 |
| 285.4218 | 287.1297 | 292.6001 |
| 295.9804 | 306.0266 | 309.5812 |
| 320.0934 | 327.8176 | 334.9706 |
| 336.8428 | 344.5622 | 349.1788 |
| 362.6069 | 363.8698 | 381.2348 |
| 385.8448 | 387.6032 | 406.5668 |
| 408.7928 | 415.7524 | 439.8608 |
| 440.9087 | 450.0213 | 459.9179 |
| 475.7877 | 483.1814 | 487.5328 |
| 521.4904 | 529.2741 | 537.6614 |
| 539.5246 | 551.1314 | 560.2578 |

|           |           |           |
|-----------|-----------|-----------|
| 574.3732  | 584.3858  | 593.1397  |
| 599.1767  | 606.4680  | 622.6173  |
| 644.9414  | 665.6329  | 676.0640  |
| 700.5942  | 710.8042  | 741.0280  |
| 752.3702  | 754.7692  | 770.3618  |
| 784.7095  | 789.7497  | 793.9166  |
| 806.2906  | 813.6938  | 824.1782  |
| 844.5169  | 853.4561  | 855.5542  |
| 882.3265  | 890.6618  | 897.8966  |
| 903.7002  | 904.9182  | 931.4292  |
| 933.9637  | 938.9058  | 944.1804  |
| 949.0781  | 950.0080  | 972.9540  |
| 974.4947  | 979.0746  | 986.5984  |
| 996.8336  | 1002.5423 | 1008.6427 |
| 1014.1776 | 1024.1106 | 1030.9704 |
| 1050.2173 | 1056.5778 | 1058.9889 |
| 1065.2310 | 1066.6163 | 1070.0090 |
| 1072.4885 | 1079.7157 | 1098.6384 |
| 1123.6936 | 1128.7728 | 1133.3897 |
| 1147.5493 | 1169.9880 | 1181.4307 |
| 1189.1285 | 1190.0547 | 1194.0561 |
| 1197.5267 | 1212.3885 | 1246.6741 |
| 1249.0723 | 1251.9792 | 1260.1159 |
| 1264.4590 | 1270.4302 | 1276.3407 |
| 1277.4660 | 1279.9678 | 1294.7384 |
| 1295.0632 | 1317.9022 | 1323.5375 |
| 1326.4161 | 1354.0223 | 1359.3148 |
| 1367.8530 | 1392.5754 | 1403.8757 |
| 1407.1505 | 1407.6656 | 1413.2319 |
| 1414.0512 | 1416.8176 | 1417.0417 |
| 1420.5199 | 1429.6574 | 1431.2246 |

|           |           |           |
|-----------|-----------|-----------|
| 1433.9377 | 1439.3693 | 1450.8705 |
| 1452.7493 | 1457.8752 | 1469.0060 |
| 1469.4912 | 1480.1413 | 1481.3459 |
| 1483.4358 | 1484.5896 | 1491.6240 |
| 1496.0506 | 1496.3442 | 1496.7850 |
| 1501.2475 | 1504.0590 | 1504.5190 |
| 1507.0416 | 1509.3863 | 1513.9576 |
| 1514.1984 | 1515.9144 | 1520.1118 |
| 1523.0865 | 1532.6034 | 1533.4376 |
| 1534.8882 | 1553.5657 | 1573.6750 |
| 1581.0155 | 1582.6414 | 1616.7772 |
| 1648.0442 | 1649.8133 | 1661.6051 |
| 1672.3761 | 1680.1398 | 1791.7852 |
| 2841.0284 | 3037.5890 | 3041.9297 |
| 3046.6658 | 3050.0790 | 3054.9704 |
| 3055.5752 | 3058.9675 | 3063.9081 |
| 3078.3891 | 3095.2947 | 3105.2470 |
| 3109.4193 | 3110.5427 | 3111.0668 |
| 3112.0891 | 3117.3190 | 3118.6240 |
| 3120.4558 | 3130.2466 | 3131.3116 |
| 3131.5311 | 3136.1267 | 3141.8060 |
| 3160.9640 | 3165.1048 | 3166.9911 |
| 3168.9742 | 3178.4155 | 3181.0840 |
| 3186.0355 | 3189.5227 | 3195.2009 |
| 3205.1799 | 3206.3336 | 3206.9985 |
| 3209.4458 | 3216.0029 | 3254.5805 |
| 3446.6284 | 3622.0602 | 3802.9963 |

**TS1'**

Zero-point correction= 0.698654

Thermal correction to Energy= 0.739028

Thermal correction to Enthalpy= 0.739973

Thermal correction to Gibbs Free Energy= 0.626507

Sum of electronic and zero-point Energies= -1821.586522

Sum of electronic and thermal Energies= -1821.546148

Sum of electronic and thermal Enthalpies= -1821.545204

Sum of electronic and thermal Free Energies= -1821.658669

#### Cartesian coordinates

|   |           |           |           |
|---|-----------|-----------|-----------|
| C | 1.152219  | -1.606195 | 1.883350  |
| C | 0.888966  | -1.612052 | 0.521501  |
| C | 0.238908  | -0.493079 | -0.048289 |
| C | -0.150646 | 0.555447  | 0.790251  |
| C | 0.115578  | 0.512909  | 2.168334  |
| N | 0.782531  | -0.564689 | 2.662355  |
| H | 1.660349  | -2.434863 | 2.353468  |
| C | -0.860637 | 1.743252  | 0.223299  |
| C | -0.124861 | 2.928364  | -0.080168 |
| C | -2.220773 | 1.674187  | -0.046741 |
| C | 1.267942  | 3.055240  | 0.191052  |
| C | -0.814230 | 4.034609  | -0.677979 |
| C | -2.889526 | 2.770662  | -0.647506 |
| C | 1.939449  | 4.217475  | -0.118305 |
| H | 1.808470  | 2.221711  | 0.627556  |
| C | -0.087848 | 5.218097  | -0.982496 |
| C | -2.201574 | 3.920968  | -0.953527 |
| H | -3.955003 | 2.700896  | -0.841169 |
| C | 1.257919  | 5.309479  | -0.710486 |
| H | 3.001154  | 4.297263  | 0.092771  |
| H | -0.616944 | 6.050654  | -1.436983 |
| H | -2.718478 | 4.762470  | -1.404931 |

|   |           |           |           |
|---|-----------|-----------|-----------|
| H | 1.802578  | 6.217381  | -0.948936 |
| C | -0.059163 | -0.514381 | -1.513161 |
| O | 0.116529  | -1.553139 | -2.175176 |
| O | 1.283201  | -2.670579 | -0.192717 |
| H | 0.927340  | -2.524778 | -1.115769 |
| C | -0.342653 | 1.619687  | 3.070636  |
| H | -1.365728 | 1.880110  | 2.793743  |
| H | -0.334802 | 1.352253  | 4.124177  |
| H | 0.285451  | 2.506018  | 2.933964  |
| C | -2.993005 | 0.451032  | 0.376339  |
| O | -2.903334 | 0.027905  | 1.540524  |
| N | -3.758205 | -0.108513 | -0.581427 |
| H | -3.726910 | 0.328071  | -1.491935 |
| C | -4.605593 | -1.312932 | -0.488148 |
| C | -5.219654 | -1.508044 | 0.917220  |
| H | -6.067623 | -2.189474 | 0.811441  |
| H | -4.494027 | -1.973404 | 1.589508  |
| O | -5.724540 | -0.303492 | 1.474099  |
| H | -4.949900 | 0.135587  | 1.858720  |
| C | -3.863216 | -2.578445 | -1.036764 |
| C | -2.630217 | -2.928576 | -0.182386 |
| H | -1.963961 | -2.071221 | -0.075135 |
| H | -2.905227 | -3.262768 | 0.821683  |
| H | -2.061706 | -3.734032 | -0.657983 |
| C | -3.409144 | -2.305571 | -2.485370 |
| H | -2.978270 | -3.212913 | -2.920502 |
| H | -4.251550 | -1.998043 | -3.115476 |
| H | -2.639057 | -1.531140 | -2.533008 |
| C | -4.840168 | -3.771464 | -1.046885 |
| H | -5.754625 | -3.533020 | -1.601794 |
| H | -4.369838 | -4.633069 | -1.531520 |

|   |           |           |           |
|---|-----------|-----------|-----------|
| H | -5.123864 | -4.079507 | -0.036408 |
| C | 3.563836  | -0.335253 | -1.023383 |
| O | 3.325919  | 0.299951  | -0.009607 |
| O | 4.471561  | -1.296504 | -1.162699 |
| C | 2.841657  | -0.109053 | -2.343364 |
| H | 3.583896  | 0.238767  | -3.074482 |
| H | 2.465011  | -1.072077 | -2.708278 |
| N | 1.725531  | 0.805810  | -2.158042 |
| H | 1.405417  | 1.174646  | -3.048994 |
| C | 5.365588  | -1.711722 | -0.048950 |
| C | 6.172097  | -2.842205 | -0.684776 |
| H | 6.717514  | -2.479541 | -1.560355 |
| H | 6.892943  | -3.234260 | 0.037724  |
| H | 5.512279  | -3.656779 | -0.996219 |
| C | 6.262794  | -0.537241 | 0.340358  |
| H | 6.809522  | -0.170150 | -0.532936 |
| H | 5.677166  | 0.279170  | 0.764483  |
| H | 6.989450  | -0.871958 | 1.086347  |
| C | 4.526088  | -2.225525 | 1.121495  |
| H | 4.002798  | -1.408500 | 1.618253  |
| H | 3.792798  | -2.954151 | 0.765065  |
| H | 5.181861  | -2.714956 | 1.847278  |
| C | 1.126412  | -0.643875 | 4.104201  |
| H | 1.752962  | -1.517628 | 4.262281  |
| H | 1.674873  | 0.250892  | 4.394735  |
| H | 0.213377  | -0.739548 | 4.691981  |
| H | -0.666531 | 0.305963  | -1.904242 |
| H | 1.983152  | 1.586695  | -1.559697 |
| H | -5.439278 | -1.106926 | -1.170145 |

Vibrational frequencies

|           |          |          |
|-----------|----------|----------|
| -109.7496 | 18.7565  | 24.7697  |
| 28.0356   | 37.8064  | 42.5485  |
| 43.7446   | 48.5903  | 57.7163  |
| 61.8697   | 69.4500  | 85.4090  |
| 89.3586   | 93.4122  | 97.1836  |
| 105.4922  | 110.4743 | 121.3437 |
| 126.6170  | 147.8548 | 151.6129 |
| 166.4756  | 174.5409 | 177.4294 |
| 191.1795  | 199.3576 | 216.4641 |
| 225.2476  | 226.8000 | 231.5035 |
| 237.9581  | 252.7490 | 255.8467 |
| 263.6254  | 267.4478 | 278.9292 |
| 292.0283  | 294.1674 | 300.2287 |
| 309.7285  | 316.2157 | 329.5885 |
| 331.5658  | 338.7715 | 346.8132 |
| 358.5135  | 360.6863 | 361.6891 |
| 371.6731  | 375.5759 | 398.6443 |
| 401.4194  | 411.4957 | 419.6060 |
| 441.4348  | 445.3581 | 456.3273 |
| 461.7209  | 468.7868 | 470.6495 |
| 490.7613  | 509.4407 | 513.1714 |
| 525.1889  | 533.0014 | 543.0164 |
| 551.0953  | 568.8766 | 572.0202 |
| 591.9997  | 595.3245 | 601.5932 |
| 628.7983  | 643.2058 | 651.2802 |
| 663.4181  | 678.9403 | 696.6540 |
| 701.4036  | 752.7216 | 760.1385 |
| 760.5998  | 772.4761 | 781.2825 |
| 797.8158  | 801.1760 | 812.1908 |
| 827.1458  | 849.7823 | 851.9163 |
| 865.5574  | 867.2438 | 872.1279 |

|           |           |           |
|-----------|-----------|-----------|
| 879.2165  | 897.5093  | 902.0296  |
| 928.5461  | 930.8615  | 935.0197  |
| 939.8919  | 941.9426  | 944.5852  |
| 946.7483  | 955.5643  | 973.7030  |
| 981.7580  | 988.1384  | 993.5043  |
| 1017.2414 | 1023.4003 | 1028.9607 |
| 1030.8397 | 1043.6162 | 1051.2531 |
| 1056.8632 | 1059.4587 | 1065.4720 |
| 1071.3730 | 1072.3512 | 1083.5795 |
| 1090.8920 | 1115.5041 | 1117.4442 |
| 1132.6758 | 1135.6588 | 1147.5515 |
| 1183.5768 | 1189.2648 | 1196.3675 |
| 1198.8310 | 1205.7860 | 1211.8795 |
| 1217.7610 | 1247.4244 | 1252.4183 |
| 1254.7892 | 1263.0265 | 1267.9069 |
| 1271.5616 | 1278.9329 | 1285.0309 |
| 1291.6207 | 1299.0291 | 1304.7985 |
| 1326.6998 | 1329.6238 | 1343.6271 |
| 1358.6687 | 1373.9394 | 1388.0710 |
| 1399.8627 | 1409.2938 | 1414.2437 |
| 1415.4411 | 1415.6252 | 1416.2487 |
| 1418.4144 | 1419.0067 | 1429.9514 |
| 1431.2308 | 1438.5908 | 1439.8480 |
| 1441.8678 | 1450.2565 | 1458.2142 |
| 1468.8569 | 1473.5269 | 1476.2463 |
| 1480.1450 | 1489.4113 | 1492.1362 |
| 1494.0705 | 1494.7596 | 1495.4610 |
| 1498.2969 | 1502.0818 | 1502.7715 |
| 1504.6657 | 1508.8438 | 1511.2230 |
| 1515.4483 | 1516.2280 | 1521.2874 |
| 1523.3136 | 1532.2459 | 1533.1900 |



|           |           |           |
|-----------|-----------|-----------|
| 1537.7727 | 1554.9193 | 1583.3011 |
| 1612.6822 | 1615.8042 | 1627.2083 |
| 1642.2137 | 1645.2966 | 1671.9867 |
| 1698.6154 | 1701.1815 | 1775.9488 |
| 3034.4452 | 3036.1263 | 3040.7857 |
| 3045.5296 | 3053.6371 | 3057.5729 |
| 3058.1838 | 3063.1580 | 3068.6777 |
| 3071.5580 | 3079.8801 | 3095.4381 |
| 3105.4266 | 3108.8452 | 3109.8160 |
| 3114.7879 | 3121.7947 | 3126.2491 |
| 3129.5910 | 3131.9747 | 3132.0223 |
| 3134.6177 | 3139.5690 | 3142.6740 |
| 3159.7079 | 3161.4509 | 3164.8323 |
| 3166.0330 | 3186.5945 | 3188.8101 |
| 3193.1587 | 3196.9752 | 3197.5541 |
| 3208.4786 | 3209.1219 | 3210.1341 |
| 3216.9641 | 3273.0997 | 3509.3053 |
| 3603.4859 | 3631.7604 | 3749.1859 |

### **M1'**

Zero-point correction= 0.702202

Thermal correction to Energy= 0.742080

Thermal correction to Enthalpy= 0.743024

Thermal correction to Gibbs Free Energy= 0.631352

Sum of electronic and zero-point Energies= -1821.584163

Sum of electronic and thermal Energies= -1821.544285

Sum of electronic and thermal Enthalpies= -1821.543341

Sum of electronic and thermal Free Energies= -1821.655013

Cartesian coordinates

|   |          |           |          |
|---|----------|-----------|----------|
| C | 1.013850 | -1.811060 | 1.731978 |
|---|----------|-----------|----------|

|   |           |           |           |
|---|-----------|-----------|-----------|
| C | 0.983974  | -1.609327 | 0.333832  |
| C | 0.372637  | -0.386491 | -0.093514 |
| C | -0.155057 | 0.514367  | 0.830347  |
| C | -0.059348 | 0.264739  | 2.209110  |
| N | 0.525928  | -0.901744 | 2.601869  |
| H | 1.448604  | -2.711221 | 2.141774  |
| C | -0.850937 | 1.748476  | 0.344010  |
| C | -0.094010 | 2.923698  | 0.051422  |
| C | -2.214196 | 1.716826  | 0.083549  |
| C | 1.306328  | 3.005804  | 0.301569  |
| C | -0.759099 | 4.055561  | -0.525726 |
| C | -2.864034 | 2.844684  | -0.481384 |
| C | 2.012765  | 4.142286  | -0.029400 |
| H | 1.818258  | 2.167472  | 0.761011  |
| C | 0.000472  | 5.214506  | -0.841493 |
| C | -2.153863 | 3.983974  | -0.777111 |
| H | -3.931999 | 2.800291  | -0.669198 |
| C | 1.356424  | 5.256451  | -0.607100 |
| H | 3.080200  | 4.186083  | 0.162374  |
| H | -0.510063 | 6.067707  | -1.278682 |
| H | -2.655760 | 4.844294  | -1.209690 |
| H | 1.926461  | 6.144660  | -0.859903 |
| C | 0.281308  | -0.155612 | -1.588001 |
| O | 0.180163  | -1.298499 | -2.324577 |
| O | 1.476149  | -2.463113 | -0.492355 |
| H | 0.683629  | -1.995121 | -1.783333 |
| C | -0.600335 | 1.198821  | 3.249296  |
| H | -0.917965 | 2.127336  | 2.778792  |
| H | -1.476098 | 0.764545  | 3.740672  |
| H | 0.145734  | 1.440491  | 4.010975  |
| C | -3.014307 | 0.485086  | 0.429632  |

|   |           |           |           |
|---|-----------|-----------|-----------|
| O | -3.012749 | 0.031103  | 1.584493  |
| N | -3.712705 | -0.041122 | -0.596838 |
| H | -3.610753 | 0.421170  | -1.489422 |
| C | -4.534047 | -1.266357 | -0.614420 |
| C | -5.217293 | -1.553157 | 0.741711  |
| H | -6.039515 | -2.248445 | 0.553894  |
| H | -4.516329 | -2.036994 | 1.427463  |
| O | -5.785365 | -0.394601 | 1.334323  |
| H | -5.039555 | 0.045510  | 1.772685  |
| C | -3.729778 | -2.481344 | -1.188932 |
| C | -2.514835 | -2.826067 | -0.307646 |
| H | -1.862595 | -1.961080 | -0.176060 |
| H | -2.810047 | -3.181551 | 0.683469  |
| H | -1.922933 | -3.615646 | -0.781821 |
| C | -3.231121 | -2.128436 | -2.605375 |
| H | -2.768585 | -3.005945 | -3.068719 |
| H | -4.056363 | -1.804505 | -3.250135 |
| H | -2.469725 | -1.344092 | -2.585178 |
| C | -4.664341 | -3.703765 | -1.288197 |
| H | -5.568702 | -3.469233 | -1.861315 |
| H | -4.149323 | -4.524745 | -1.797349 |
| H | -4.969369 | -4.070576 | -0.303829 |
| C | 3.565260  | -0.286825 | -0.978470 |
| O | 3.321342  | 0.413820  | -0.011720 |
| O | 4.493153  | -1.215604 | -1.096060 |
| C | 2.808196  | -0.147250 | -2.291809 |
| H | 3.440931  | 0.366260  | -3.018978 |
| H | 2.530907  | -1.119185 | -2.693507 |
| N | 1.568994  | 0.657585  | -2.086990 |
| H | 1.305710  | 1.086647  | -2.976878 |
| C | 5.359769  | -1.615528 | 0.055032  |

|   |           |           |           |
|---|-----------|-----------|-----------|
| C | 6.189917  | -2.746241 | -0.546442 |
| H | 6.764492  | -2.388052 | -1.404999 |
| H | 6.886486  | -3.128794 | 0.204300  |
| H | 5.544097  | -3.565815 | -0.873075 |
| C | 6.235038  | -0.431956 | 0.461785  |
| H | 6.807758  | -0.067877 | -0.395899 |
| H | 5.632943  | 0.383935  | 0.862754  |
| H | 6.939566  | -0.758727 | 1.232127  |
| C | 4.468934  | -2.122590 | 1.189175  |
| H | 3.927355  | -1.304400 | 1.664743  |
| H | 3.743189  | -2.839739 | 0.797393  |
| H | 5.091776  | -2.615510 | 1.940824  |
| C | 0.635635  | -1.206779 | 4.046917  |
| H | 1.060980  | -2.199957 | 4.165057  |
| H | 1.285548  | -0.473025 | 4.524547  |
| H | -0.353358 | -1.176727 | 4.503392  |
| H | -0.524410 | 0.534190  | -1.841463 |
| H | 1.764083  | 1.422981  | -1.425025 |
| H | -5.335749 | -1.043459 | -1.328973 |

#### Vibrational frequencies

|          |          |          |
|----------|----------|----------|
| 23.1829  | 27.8185  | 32.0120  |
| 38.4653  | 49.1980  | 50.3966  |
| 55.6964  | 58.0767  | 64.0499  |
| 72.0707  | 81.0089  | 88.1164  |
| 92.2182  | 100.9803 | 108.6423 |
| 111.8027 | 130.5348 | 135.6617 |
| 140.0918 | 154.9545 | 163.0312 |
| 171.9471 | 182.0362 | 186.9137 |
| 212.7617 | 223.2169 | 237.7551 |
| 239.0141 | 243.7586 | 249.0377 |

|           |           |           |
|-----------|-----------|-----------|
| 255.1823  | 266.7560  | 269.7336  |
| 280.0596  | 280.9637  | 296.7507  |
| 301.5238  | 305.1042  | 310.0552  |
| 326.9290  | 331.4358  | 337.9327  |
| 339.1433  | 347.6446  | 357.6130  |
| 360.3659  | 367.1965  | 368.7873  |
| 389.0834  | 400.0276  | 410.1150  |
| 414.9865  | 439.3282  | 442.8069  |
| 453.2270  | 458.8235  | 466.5003  |
| 467.8604  | 476.1482  | 497.0592  |
| 519.2748  | 524.9243  | 537.9126  |
| 542.7415  | 557.4306  | 571.5436  |
| 582.5920  | 589.2117  | 598.4789  |
| 620.6638  | 624.3216  | 640.4813  |
| 646.2480  | 656.1136  | 674.9345  |
| 689.4479  | 698.1991  | 711.7287  |
| 752.9874  | 759.2436  | 769.4554  |
| 772.2537  | 781.4976  | 792.1866  |
| 802.3278  | 806.1113  | 826.8770  |
| 840.7887  | 849.6924  | 852.6736  |
| 867.3181  | 875.3214  | 895.9588  |
| 898.7306  | 908.9578  | 927.2182  |
| 940.8782  | 941.8905  | 944.5322  |
| 947.7060  | 955.7128  | 977.3672  |
| 980.1110  | 982.5558  | 991.1146  |
| 991.2151  | 998.1387  | 1013.2445 |
| 1014.3448 | 1019.3582 | 1030.7148 |
| 1043.0830 | 1045.7057 | 1055.5590 |
| 1058.0072 | 1067.4693 | 1073.8189 |
| 1074.2983 | 1084.4873 | 1090.5786 |
| 1117.3947 | 1131.1820 | 1135.7764 |

|           |           |           |
|-----------|-----------|-----------|
| 1148.8523 | 1178.6653 | 1189.7529 |
| 1191.1427 | 1195.0974 | 1199.5800 |
| 1212.4958 | 1214.0900 | 1246.5960 |
| 1248.1558 | 1252.2155 | 1253.6356 |
| 1261.1500 | 1268.9082 | 1275.1017 |
| 1281.3887 | 1289.3129 | 1295.1905 |
| 1296.1994 | 1318.6152 | 1324.9676 |
| 1332.0651 | 1344.3138 | 1345.5669 |
| 1366.8185 | 1383.1243 | 1399.1714 |
| 1401.9019 | 1410.1744 | 1414.8944 |
| 1417.2168 | 1418.1658 | 1418.6903 |
| 1425.0127 | 1428.8670 | 1430.2278 |
| 1431.9059 | 1436.7958 | 1440.2377 |
| 1445.1549 | 1450.5370 | 1451.2842 |
| 1469.0699 | 1477.3767 | 1480.6161 |
| 1481.5091 | 1482.6547 | 1489.0365 |
| 1489.7685 | 1493.9135 | 1495.5404 |
| 1498.9834 | 1500.7606 | 1502.9952 |
| 1504.2362 | 1507.5674 | 1508.0847 |
| 1511.3784 | 1517.0577 | 1517.2213 |
| 1521.9732 | 1531.6855 | 1535.9842 |
| 1538.1232 | 1553.2365 | 1581.4768 |
| 1585.6246 | 1591.1865 | 1609.5948 |
| 1613.5430 | 1643.9317 | 1656.1088 |
| 1670.7912 | 1704.2167 | 1786.0882 |
| 2871.9673 | 3034.6720 | 3039.1653 |
| 3045.6401 | 3055.4077 | 3055.7936 |
| 3059.9377 | 3062.4188 | 3065.2270 |
| 3069.8116 | 3094.3153 | 3103.3168 |
| 3107.5782 | 3113.2732 | 3113.8835 |
| 3119.6094 | 3124.2705 | 3126.2752 |

|           |           |           |
|-----------|-----------|-----------|
| 3130.9670 | 3131.2714 | 3133.5298 |
| 3136.0311 | 3138.3603 | 3143.4190 |
| 3155.1350 | 3161.5151 | 3165.2477 |
| 3178.3852 | 3180.6190 | 3188.8844 |
| 3192.6915 | 3197.1462 | 3199.0315 |
| 3204.4849 | 3209.2218 | 3212.3000 |
| 3221.4334 | 3260.9643 | 3356.5151 |
| 3504.1800 | 3629.8412 | 3736.9140 |

## TS2

Zero-point correction= 0.726316

Thermal correction to Energy= 0.769900

Thermal correction to Enthalpy= 0.770844

Thermal correction to Gibbs Free Energy= 0.649913

Sum of electronic and zero-point Energies= -2086.151418

Sum of electronic and thermal Energies= -2086.107834

Sum of electronic and thermal Enthalpies= -2086.106890

Sum of electronic and thermal Free Energies= -2086.227822

## Cartesian coordinates

|   |           |          |           |
|---|-----------|----------|-----------|
| C | 0.516880  | 1.999027 | 3.423232  |
| C | 1.405801  | 1.546779 | 2.416598  |
| C | 0.843519  | 1.480764 | 1.097666  |
| C | -0.489028 | 1.822357 | 0.873307  |
| C | -1.314156 | 2.264107 | 1.921237  |
| N | -0.769496 | 2.324609 | 3.169586  |
| H | 0.856100  | 2.079007 | 4.446709  |
| C | -1.039343 | 1.760497 | -0.522725 |
| C | -0.833663 | 2.901144 | -1.366626 |
| C | -1.708536 | 0.643729 | -1.018044 |
| C | -0.182009 | 4.079752 | -0.903951 |

|   |           |           |           |
|---|-----------|-----------|-----------|
| C | -1.291562 | 2.865493  | -2.724426 |
| C | -2.132591 | 0.618541  | -2.377002 |
| C | 0.001799  | 5.159512  | -1.738652 |
| H | 0.175191  | 4.121810  | 0.118268  |
| C | -1.083919 | 3.994816  | -3.559928 |
| C | -1.926651 | 1.691415  | -3.204352 |
| H | -2.561730 | -0.289170 | -2.783687 |
| C | -0.452461 | 5.119506  | -3.079048 |
| H | 0.500245  | 6.049341  | -1.367025 |
| H | -1.433315 | 3.953466  | -4.587581 |
| H | -2.239817 | 1.647901  | -4.243220 |
| H | -0.299226 | 5.978103  | -3.725352 |
| C | 1.713693  | 0.916214  | -0.018523 |
| O | 3.065112  | 1.207261  | 0.155742  |
| O | 2.616624  | 1.215876  | 2.687593  |
| H | 3.195031  | 1.197401  | 1.148904  |
| C | -2.753117 | 2.651637  | 1.737507  |
| H | -3.026691 | 2.573510  | 0.686850  |
| H | -3.423913 | 1.997802  | 2.304756  |
| H | -2.942749 | 3.681061  | 2.057902  |
| C | -1.985722 | -0.536039 | -0.126819 |
| O | -1.264200 | -0.810763 | 0.845471  |
| N | -3.067063 | -1.286837 | -0.446375 |
| H | -3.693562 | -0.960129 | -1.167651 |
| C | -3.436300 | -2.500207 | 0.282429  |
| C | -3.701895 | -3.630680 | -0.724654 |
| H | -4.031610 | -4.522972 | -0.180944 |
| H | -4.505332 | -3.350394 | -1.413510 |
| O | -2.568743 | -3.953870 | -1.530344 |
| H | -1.735138 | -3.808366 | -1.030160 |
| C | -4.604257 | -2.257188 | 1.297030  |



|   |           |           |           |
|---|-----------|-----------|-----------|
| C | -4.733294 | -3.478410 | 2.229763  |
| H | -5.038297 | -4.382633 | 1.695420  |
| H | -3.785818 | -3.686980 | 2.738970  |
| H | -5.489446 | -3.283060 | 2.997032  |
| C | -5.941710 | -2.013840 | 0.572604  |
| H | -6.720991 | -1.766637 | 1.300838  |
| H | -5.873648 | -1.175072 | -0.129157 |
| H | -6.278078 | -2.896116 | 0.019397  |
| C | -4.268810 | -1.021719 | 2.156938  |
| H | -4.263442 | -0.110752 | 1.552450  |
| H | -5.020781 | -0.896936 | 2.942710  |
| H | -3.285775 | -1.118773 | 2.626568  |
| C | 3.773263  | -1.440879 | -0.122730 |
| O | 3.861538  | -1.475287 | -1.335056 |
| O | 4.786161  | -1.488319 | 0.749968  |
| C | 2.446451  | -1.401825 | 0.621453  |
| H | 2.045347  | -2.420322 | 0.638419  |
| H | 2.595939  | -1.055359 | 1.645970  |
| N | 1.470493  | -0.580139 | -0.107695 |
| H | 0.541523  | -0.770628 | 0.293177  |
| C | 6.198131  | -1.526637 | 0.307298  |
| C | 6.958912  | -1.534034 | 1.632757  |
| H | 6.686585  | -2.410672 | 2.227404  |
| H | 8.035705  | -1.561877 | 1.444234  |
| H | 6.729163  | -0.634958 | 2.211620  |
| C | 6.459160  | -2.810066 | -0.483053 |
| H | 6.161330  | -3.683210 | 0.105258  |
| H | 5.907498  | -2.810348 | -1.423152 |
| H | 7.528668  | -2.890490 | -0.699597 |
| C | 6.512103  | -0.263580 | -0.497242 |
| H | 5.981854  | -0.262258 | -1.449476 |

|   |           |           |           |
|---|-----------|-----------|-----------|
| H | 6.218588  | 0.624383  | 0.069963  |
| H | 7.588071  | -0.214335 | -0.689045 |
| C | -1.606576 | 2.764974  | 4.307122  |
| H | -1.013098 | 2.725860  | 5.217119  |
| H | -1.947325 | 3.787307  | 4.140172  |
| H | -2.467361 | 2.103417  | 4.407025  |
| H | 1.400032  | 1.318577  | -0.985221 |
| H | 1.261136  | -1.010021 | -1.382210 |
| C | -0.095795 | -2.228057 | -2.124028 |
| O | 0.781442  | -1.313531 | -2.389685 |
| O | -1.027786 | -2.363071 | -3.089635 |
| H | -1.727992 | -2.964138 | -2.735116 |
| O | -0.122696 | -2.913826 | -1.085493 |
| H | -2.549941 | -2.764144 | 0.867047  |

Vibrational frequencies

|           |          |          |
|-----------|----------|----------|
| -563.7370 | 15.8300  | 21.1550  |
| 27.7392   | 32.4439  | 35.6348  |
| 42.2360   | 45.6900  | 52.2487  |
| 59.5575   | 62.5002  | 66.8777  |
| 80.8457   | 91.2788  | 94.2870  |
| 100.1266  | 112.5369 | 119.0337 |
| 119.6339  | 133.1947 | 140.3793 |
| 143.9506  | 145.9917 | 157.8473 |
| 160.4300  | 173.9726 | 184.1094 |
| 189.2867  | 194.4617 | 218.1945 |
| 221.8413  | 224.0297 | 226.5842 |
| 240.0335  | 249.7077 | 258.0126 |
| 259.1514  | 272.5835 | 278.1552 |
| 283.4908  | 287.7732 | 288.6638 |
| 298.4321  | 311.8313 | 318.2093 |

|           |           |           |
|-----------|-----------|-----------|
| 322.2597  | 331.0377  | 336.3124  |
| 343.9131  | 348.7638  | 361.4349  |
| 363.5006  | 381.0890  | 381.6461  |
| 389.4907  | 403.0880  | 406.3252  |
| 411.8462  | 426.9558  | 439.9094  |
| 441.8372  | 467.3968  | 468.9349  |
| 480.2424  | 486.5829  | 487.1247  |
| 515.4485  | 523.0476  | 534.5857  |
| 547.7448  | 557.1433  | 564.9574  |
| 574.9334  | 582.6014  | 586.9237  |
| 600.6287  | 619.8708  | 625.1908  |
| 641.3652  | 665.0781  | 666.0296  |
| 680.0475  | 687.0847  | 689.7766  |
| 732.9340  | 751.5239  | 756.8802  |
| 762.3902  | 775.5257  | 785.1238  |
| 788.1659  | 793.8805  | 801.1430  |
| 806.9955  | 812.3301  | 822.2230  |
| 832.5594  | 841.1769  | 845.5274  |
| 866.8157  | 871.0094  | 892.2828  |
| 895.1356  | 912.6281  | 919.0012  |
| 926.1452  | 937.4174  | 937.9334  |
| 943.5117  | 947.1782  | 950.0243  |
| 950.9195  | 965.2178  | 972.6662  |
| 980.4415  | 983.0922  | 985.3895  |
| 1008.7256 | 1019.2448 | 1029.3947 |
| 1033.2444 | 1034.6610 | 1053.6656 |
| 1056.6107 | 1059.8694 | 1064.5549 |
| 1068.6228 | 1080.3132 | 1083.9422 |
| 1105.8984 | 1111.0288 | 1124.9329 |
| 1133.9078 | 1140.2113 | 1142.6889 |
| 1149.1739 | 1176.1511 | 1184.6005 |

|           |           |           |
|-----------|-----------|-----------|
| 1190.7374 | 1196.4908 | 1205.2528 |
| 1210.2933 | 1216.3306 | 1246.6466 |
| 1250.5707 | 1256.0102 | 1267.1883 |
| 1268.6911 | 1271.3705 | 1273.6820 |
| 1276.8308 | 1283.9530 | 1290.6155 |
| 1292.8666 | 1310.3819 | 1323.2309 |
| 1339.1457 | 1349.5304 | 1357.9299 |
| 1372.6927 | 1375.6481 | 1391.8043 |
| 1401.4891 | 1407.3898 | 1411.3549 |
| 1412.0018 | 1414.9123 | 1417.1033 |
| 1420.2952 | 1421.6861 | 1429.7573 |
| 1433.6512 | 1437.8495 | 1445.5771 |
| 1449.6642 | 1453.4105 | 1467.4328 |
| 1469.6308 | 1478.7589 | 1480.1170 |
| 1483.0003 | 1484.1440 | 1485.3167 |
| 1491.0384 | 1493.0880 | 1494.5921 |
| 1495.1779 | 1496.0879 | 1502.6857 |
| 1502.9730 | 1505.0618 | 1509.6239 |
| 1511.7068 | 1515.1004 | 1519.8882 |
| 1522.1633 | 1525.0083 | 1526.5087 |
| 1531.8139 | 1531.9167 | 1543.7650 |
| 1554.6117 | 1563.2749 | 1579.1001 |
| 1583.1533 | 1609.7279 | 1642.0271 |
| 1647.8481 | 1670.1258 | 1693.9441 |
| 1723.1314 | 1763.8646 | 1795.5141 |
| 3037.6460 | 3040.1714 | 3047.9812 |
| 3051.0185 | 3051.1756 | 3052.4476 |
| 3054.7705 | 3060.8957 | 3074.3981 |
| 3079.7075 | 3084.8762 | 3091.3870 |
| 3100.5171 | 3107.3131 | 3107.6643 |
| 3108.9410 | 3116.1866 | 3119.7280 |

|           |           |           |
|-----------|-----------|-----------|
| 3121.3433 | 3123.7506 | 3124.1290 |
| 3127.8268 | 3130.9222 | 3131.3051 |
| 3136.5121 | 3138.7848 | 3164.2656 |
| 3167.3920 | 3174.6454 | 3175.4575 |
| 3186.1470 | 3193.5455 | 3196.4399 |
| 3201.8982 | 3209.7139 | 3223.1089 |
| 3228.3609 | 3252.4778 | 3319.8841 |
| 3387.9686 | 3517.9326 | 3639.6199 |

## M2

Zero-point correction= 0.727231

Thermal correction to Energy= 0.771516

Thermal correction to Enthalpy= 0.772460

Thermal correction to Gibbs Free Energy= 0.648993

Sum of electronic and zero-point Energies= -2086.138119

Sum of electronic and thermal Energies= -2086.093834

Sum of electronic and thermal Enthalpies= -2086.092890

Sum of electronic and thermal Free Energies= -2086.216357

## Cartesian coordinates

|   |           |           |           |
|---|-----------|-----------|-----------|
| C | 0.330594  | -0.768424 | 3.732770  |
| C | 1.284951  | -0.482706 | 2.724861  |
| C | 0.799206  | 0.323344  | 1.638802  |
| C | -0.526791 | 0.755374  | 1.614808  |
| C | -1.414808 | 0.447675  | 2.661724  |
| N | -0.942550 | -0.320670 | 3.684477  |
| H | 0.610838  | -1.374773 | 4.583106  |
| C | -1.032201 | 1.560951  | 0.452839  |
| C | -0.790556 | 2.972021  | 0.414869  |
| C | -1.751701 | 0.961123  | -0.571913 |
| C | -0.085968 | 3.649139  | 1.449147  |

|   |           |           |           |
|---|-----------|-----------|-----------|
| C | -1.263733 | 3.734430  | -0.703800 |
| C | -2.229011 | 1.729112  | -1.667938 |
| C | 0.146182  | 5.004640  | 1.374143  |
| H | 0.274630  | 3.083651  | 2.301315  |
| C | -1.005847 | 5.130535  | -0.750121 |
| C | -1.978632 | 3.075991  | -1.738549 |
| H | -2.749676 | 1.225581  | -2.474731 |
| C | -0.315770 | 5.753943  | 0.264877  |
| H | 0.687974  | 5.504126  | 2.171265  |
| H | -1.364928 | 5.697933  | -1.604045 |
| H | -2.321660 | 3.652760  | -2.592110 |
| H | -0.123916 | 6.821394  | 0.218913  |
| C | 1.754164  | 0.653222  | 0.494473  |
| O | 3.082939  | 0.738204  | 0.921135  |
| O | 2.485269  | -0.930263 | 2.795185  |
| H | 3.156869  | 0.061495  | 1.653155  |
| C | -2.830975 | 0.943852  | 2.730260  |
| H | -3.062940 | 1.536966  | 1.848054  |
| H | -3.551671 | 0.122828  | 2.780888  |
| H | -2.989857 | 1.578166  | 3.609046  |
| C | -2.024085 | -0.515103 | -0.557112 |
| O | -1.126189 | -1.353448 | -0.352765 |
| N | -3.305649 | -0.875636 | -0.770996 |
| H | -3.988254 | -0.150035 | -0.935652 |
| C | -3.734251 | -2.278571 | -0.795998 |
| C | -3.558408 | -2.859906 | -2.212845 |
| H | -3.724293 | -3.945059 | -2.166754 |
| H | -4.304894 | -2.438731 | -2.895031 |
| O | -2.286899 | -2.564828 | -2.776132 |
| H | -1.635467 | -2.522683 | -2.058696 |
| C | -5.152538 | -2.449542 | -0.174192 |

|   |           |           |           |
|---|-----------|-----------|-----------|
| C | -5.499126 | -3.951745 | -0.118233 |
| H | -5.646830 | -4.378562 | -1.114157 |
| H | -4.711154 | -4.522292 | 0.385489  |
| H | -6.428726 | -4.096799 | 0.441053  |
| C | -6.240381 | -1.711935 | -0.981308 |
| H | -7.213768 | -1.853566 | -0.501030 |
| H | -6.065940 | -0.631157 | -1.030087 |
| H | -6.319595 | -2.088315 | -2.004887 |
| C | -5.132367 | -1.896742 | 1.265423  |
| H | -4.955516 | -0.818156 | 1.279040  |
| H | -6.093656 | -2.082549 | 1.754688  |
| H | -4.349007 | -2.376908 | 1.862770  |
| C | 3.877049  | -1.261071 | -0.848670 |
| O | 4.199199  | -0.608530 | -1.823498 |
| O | 4.709308  | -1.871480 | 0.004377  |
| C | 2.429058  | -1.542501 | -0.465379 |
| H | 2.049522  | -2.294231 | -1.165335 |
| H | 2.386514  | -1.953495 | 0.546514  |
| N | 1.612054  | -0.334197 | -0.628475 |
| H | 0.628613  | -0.624930 | -0.685296 |
| C | 6.177462  | -1.726522 | -0.095851 |
| C | 6.669785  | -2.529213 | 1.108126  |
| H | 6.348644  | -3.572002 | 1.031828  |
| H | 7.762049  | -2.503240 | 1.152864  |
| H | 6.271575  | -2.109401 | 2.036283  |
| C | 6.672575  | -2.340957 | -1.406393 |
| H | 6.329085  | -3.376214 | -1.492639 |
| H | 6.311244  | -1.774335 | -2.264661 |
| H | 7.766746  | -2.340351 | -1.416531 |
| C | 6.553479  | -0.249460 | 0.041355  |
| H | 6.220672  | 0.321923  | -0.824859 |

|   |           |           |           |
|---|-----------|-----------|-----------|
| H | 6.091567  | 0.172932  | 0.938220  |
| H | 7.639962  | -0.158442 | 0.132140  |
| C | -1.848937 | -0.694982 | 4.792089  |
| H | -1.296389 | -1.294027 | 5.511449  |
| H | -2.224872 | 0.203209  | 5.282258  |
| H | -2.684843 | -1.276183 | 4.400728  |
| H | 1.480429  | 1.619577  | 0.061980  |
| H | 1.770298  | 0.502942  | -1.899918 |
| C | 0.565415  | 1.001305  | -3.320065 |
| O | 1.660231  | 1.252031  | -2.644506 |
| O | 0.287138  | 2.028972  | -4.160307 |
| H | -0.531992 | 1.788797  | -4.619826 |
| O | -0.139463 | 0.003984  | -3.238837 |
| H | -3.029650 | -2.805128 | -0.142230 |

Vibrational frequencies

|          |          |          |
|----------|----------|----------|
| -13.3361 | 17.7008  | 21.8304  |
| 26.2647  | 31.3106  | 31.5162  |
| 38.5012  | 42.3200  | 46.2356  |
| 52.2063  | 59.6792  | 66.6075  |
| 69.9099  | 81.7915  | 89.2028  |
| 91.0061  | 97.1510  | 109.3704 |
| 118.2367 | 121.9470 | 123.5711 |
| 125.0434 | 132.8626 | 141.8391 |
| 144.5894 | 150.3884 | 165.0475 |
| 174.2194 | 177.8187 | 198.9664 |
| 214.1728 | 221.1612 | 228.9508 |
| 239.6949 | 242.7209 | 251.1053 |
| 258.6150 | 260.8948 | 275.6045 |
| 284.9873 | 288.9410 | 289.6818 |
| 300.5972 | 316.5025 | 318.9799 |



|           |           |           |
|-----------|-----------|-----------|
| 325.4599  | 328.3002  | 335.9225  |
| 350.2130  | 353.8730  | 358.0196  |
| 367.0606  | 373.2389  | 386.2764  |
| 390.7200  | 401.1559  | 415.2264  |
| 418.2817  | 435.3150  | 439.5179  |
| 443.3664  | 460.5962  | 467.4343  |
| 474.4198  | 478.9699  | 482.0969  |
| 511.2488  | 529.0228  | 531.7256  |
| 536.1679  | 552.9144  | 553.2041  |
| 556.7909  | 557.4272  | 564.7760  |
| 578.8072  | 583.2549  | 597.7725  |
| 615.8183  | 630.0120  | 643.3605  |
| 661.0772  | 666.1774  | 677.9221  |
| 694.3377  | 740.2922  | 752.4473  |
| 756.8895  | 764.1136  | 764.6299  |
| 781.3741  | 793.9287  | 795.6489  |
| 797.2993  | 811.2887  | 823.6307  |
| 841.4992  | 846.2667  | 854.8116  |
| 869.3544  | 888.8336  | 890.6090  |
| 896.9037  | 916.9306  | 920.9908  |
| 934.9899  | 935.8371  | 938.6166  |
| 947.4215  | 948.2279  | 950.5839  |
| 969.9579  | 979.8505  | 981.7920  |
| 982.3989  | 987.5055  | 1005.2320 |
| 1007.5251 | 1015.7172 | 1020.0527 |
| 1033.7148 | 1050.0909 | 1054.9736 |
| 1058.8156 | 1059.4216 | 1064.1393 |
| 1069.0911 | 1076.4988 | 1083.4433 |
| 1108.0005 | 1113.4023 | 1120.8695 |
| 1129.7235 | 1134.8940 | 1147.4062 |
| 1165.3594 | 1179.0045 | 1186.8667 |

|           |           |           |
|-----------|-----------|-----------|
| 1193.0632 | 1199.1549 | 1207.0137 |
| 1210.9774 | 1211.6852 | 1237.1918 |
| 1246.1407 | 1250.7878 | 1256.2320 |
| 1271.2564 | 1273.3755 | 1274.6088 |
| 1276.2834 | 1277.2312 | 1285.6212 |
| 1289.4942 | 1292.8361 | 1309.2318 |
| 1324.7579 | 1349.1454 | 1349.5706 |
| 1362.2261 | 1379.6238 | 1395.5585 |
| 1402.8175 | 1409.2628 | 1410.4754 |
| 1410.8036 | 1413.5800 | 1419.2007 |
| 1420.5868 | 1423.3924 | 1424.3693 |
| 1427.8924 | 1431.3536 | 1435.9870 |
| 1448.7204 | 1449.0584 | 1460.8501 |
| 1467.2610 | 1478.6464 | 1478.8071 |
| 1481.9099 | 1484.3376 | 1487.0291 |
| 1490.8400 | 1494.7039 | 1496.0250 |
| 1496.6653 | 1500.3529 | 1500.6221 |
| 1504.2608 | 1507.3440 | 1512.5908 |
| 1513.0823 | 1518.0838 | 1521.3238 |
| 1522.0248 | 1527.3717 | 1530.1427 |
| 1532.5568 | 1548.2510 | 1553.3595 |
| 1557.5747 | 1576.8891 | 1579.5332 |
| 1603.2262 | 1613.4813 | 1638.8987 |
| 1648.0346 | 1670.9864 | 1680.3645 |
| 1773.1917 | 1791.5895 | 2135.7354 |
| 3018.1438 | 3038.9241 | 3039.6060 |
| 3046.3395 | 3050.8164 | 3054.7068 |
| 3055.1983 | 3060.6478 | 3060.8890 |
| 3066.1580 | 3080.3273 | 3081.8304 |
| 3090.5750 | 3104.8697 | 3108.5912 |
| 3113.0172 | 3114.6092 | 3123.3313 |

|           |           |           |
|-----------|-----------|-----------|
| 3123.6982 | 3124.8569 | 3126.8556 |
| 3128.1628 | 3128.3661 | 3130.6703 |
| 3136.5002 | 3156.3454 | 3164.4465 |
| 3167.4300 | 3173.7656 | 3180.1674 |
| 3185.2150 | 3193.5102 | 3194.9269 |
| 3202.1703 | 3207.6287 | 3216.6245 |
| 3217.2424 | 3249.3538 | 3367.7972 |
| 3641.7012 | 3747.5857 | 3799.1787 |

### TS3

Zero-point correction= 0.723236

Thermal correction to Energy= 0.768405

Thermal correction to Enthalpy= 0.769350

Thermal correction to Gibbs Free Energy= 0.644822

Sum of electronic and zero-point Energies= -2086.133299

Sum of electronic and thermal Energies= -2086.088129

Sum of electronic and thermal Enthalpies= -2086.087184

Sum of electronic and thermal Free Energies= -2086.211713

### Cartesian coordinates

|   |           |           |           |
|---|-----------|-----------|-----------|
| C | -1.923944 | 3.994100  | 0.086964  |
| C | -1.016213 | 3.157631  | -0.630457 |
| C | -1.252184 | 1.741913  | -0.457072 |
| C | -2.340557 | 1.285688  | 0.300886  |
| C | -3.187249 | 2.179756  | 0.971304  |
| N | -2.932343 | 3.516913  | 0.835948  |
| H | -1.807591 | 5.067808  | 0.032493  |
| C | -2.640901 | -0.180847 | 0.389622  |
| C | -3.628065 | -0.752456 | -0.475016 |
| C | -1.949027 | -0.990184 | 1.274185  |
| C | -4.346815 | 0.019491  | -1.428522 |

|   |           |           |           |
|---|-----------|-----------|-----------|
| C | -3.898979 | -2.157424 | -0.386351 |
| C | -2.211521 | -2.382243 | 1.341634  |
| C | -5.291799 | -0.564735 | -2.241864 |
| H | -4.132258 | 1.078146  | -1.519606 |
| C | -4.880742 | -2.728137 | -1.239750 |
| C | -3.171233 | -2.949169 | 0.540854  |
| H | -1.640425 | -2.991337 | 2.034721  |
| C | -5.564882 | -1.951318 | -2.146942 |
| H | -5.829791 | 0.039948  | -2.965577 |
| H | -5.078180 | -3.793908 | -1.165202 |
| H | -3.373711 | -4.014652 | 0.595748  |
| H | -6.311838 | -2.398744 | -2.795455 |
| C | -0.328260 | 0.757584  | -1.068464 |
| O | -1.240286 | 0.176867  | -2.503313 |
| O | -0.092098 | 3.664701  | -1.336934 |
| C | -4.332805 | 1.745022  | 1.839139  |
| H | -4.356064 | 0.659137  | 1.899308  |
| H | -4.234091 | 2.130292  | 2.858630  |
| H | -5.297244 | 2.082706  | 1.444617  |
| C | -0.892444 | -0.399044 | 2.172623  |
| O | -1.169558 | 0.425473  | 3.051461  |
| N | 0.357629  | -0.852406 | 1.922373  |
| H | 0.476334  | -1.479224 | 1.129706  |
| C | 1.509943  | -0.462510 | 2.742299  |
| C | 1.928438  | 0.989396  | 2.436867  |
| H | 1.046897  | 1.620364  | 2.603604  |
| H | 2.690965  | 1.296574  | 3.158318  |
| O | 2.474240  | 1.209326  | 1.141993  |
| H | 1.746412  | 1.293618  | 0.506352  |
| C | 2.625681  | -1.549977 | 2.684195  |
| C | 2.067184  | -2.852348 | 3.295423  |

|   |          |           |           |
|---|----------|-----------|-----------|
| H | 1.757696 | -2.702137 | 4.335966  |
| H | 1.201458 | -3.218863 | 2.735103  |
| H | 2.831300 | -3.636733 | 3.279633  |
| C | 3.825893 | -1.081805 | 3.529976  |
| H | 4.552015 | -1.895482 | 3.626926  |
| H | 4.341358 | -0.234811 | 3.067265  |
| H | 3.517134 | -0.785621 | 4.539172  |
| C | 3.115146 | -1.839429 | 1.249304  |
| H | 3.462343 | -0.930726 | 0.758268  |
| H | 3.943893 | -2.556139 | 1.287462  |
| H | 2.335058 | -2.286186 | 0.625793  |
| C | 3.292215 | 0.935003  | -1.726858 |
| O | 3.457253 | 2.140289  | -1.747866 |
| O | 4.231043 | -0.001143 | -1.597732 |
| C | 1.926302 | 0.285626  | -1.887518 |
| H | 1.798256 | 0.039134  | -2.952024 |
| H | 1.868577 | -0.649689 | -1.330938 |
| N | 0.900093 | 1.203291  | -1.420564 |
| H | 0.946288 | 2.195276  | -1.682472 |
| C | 5.662398 | 0.340215  | -1.399382 |
| C | 6.301278 | -1.036039 | -1.220583 |
| H | 6.124437 | -1.658954 | -2.101882 |
| H | 7.380253 | -0.928846 | -1.079748 |
| H | 5.881584 | -1.540281 | -0.345743 |
| C | 6.191688 | 1.042708  | -2.649824 |
| H | 6.016033 | 0.425257  | -3.535715 |
| H | 5.708138 | 2.010363  | -2.788444 |
| H | 7.269707 | 1.199432  | -2.548042 |
| C | 5.821473 | 1.186160  | -0.134355 |
| H | 5.402101 | 2.182878  | -0.268499 |
| H | 5.314954 | 0.706801  | 0.707050  |

|   |           |           |           |
|---|-----------|-----------|-----------|
| H | 6.886086  | 1.277557  | 0.100760  |
| C | -3.789828 | 4.493094  | 1.544701  |
| H | -3.469827 | 5.498482  | 1.283072  |
| H | -4.828882 | 4.352484  | 1.247473  |
| H | -3.693345 | 4.348981  | 2.621294  |
| H | -0.318125 | -0.230413 | -0.628564 |
| C | -0.463877 | -2.794613 | -1.497735 |
| O | -1.139804 | -2.252363 | -2.430094 |
| O | -0.629411 | -4.148267 | -1.438639 |
| O | 0.300964  | -2.244718 | -0.676769 |
| H | -1.147998 | -0.945229 | -2.486673 |
| H | -0.089108 | -4.453851 | -0.694362 |
| H | -0.793322 | 0.534244  | -3.285999 |
| H | 1.148254  | -0.430208 | 3.779346  |

Vibrational frequencies

|           |          |          |
|-----------|----------|----------|
| -427.6390 | 19.1976  | 21.3179  |
| 30.5674   | 34.2784  | 38.4483  |
| 43.7869   | 48.0887  | 53.5321  |
| 53.8777   | 60.9718  | 68.8743  |
| 72.9811   | 79.2416  | 81.3644  |
| 95.5930   | 95.7592  | 103.5673 |
| 108.0292  | 109.4231 | 116.2192 |
| 120.6195  | 127.6836 | 138.2403 |
| 146.3116  | 151.7902 | 158.4466 |
| 164.7097  | 166.5876 | 178.5609 |
| 191.2295  | 203.0841 | 213.2957 |
| 219.5035  | 227.3731 | 234.1550 |
| 244.2889  | 249.5331 | 253.9351 |
| 268.0519  | 275.4517 | 282.5400 |
| 289.9487  | 301.2170 | 304.7085 |

|           |           |           |
|-----------|-----------|-----------|
| 310.3242  | 321.9302  | 333.1705  |
| 335.6944  | 341.3474  | 360.1453  |
| 365.5177  | 372.2244  | 383.8982  |
| 388.0951  | 403.4141  | 408.6117  |
| 412.0589  | 416.0677  | 431.7824  |
| 440.9448  | 444.2504  | 455.9609  |
| 463.9968  | 476.6896  | 479.5393  |
| 487.8457  | 494.6196  | 501.6320  |
| 508.0632  | 534.2761  | 535.2815  |
| 548.5234  | 554.7285  | 569.3862  |
| 579.4532  | 583.5440  | 604.4199  |
| 611.6726  | 615.6440  | 643.8668  |
| 661.3723  | 672.1121  | 688.2057  |
| 697.5693  | 704.1800  | 711.7968  |
| 741.2288  | 750.1735  | 754.2287  |
| 761.6002  | 767.0550  | 785.7915  |
| 791.2801  | 801.1724  | 805.8589  |
| 807.4545  | 822.1503  | 830.9404  |
| 842.8588  | 844.7779  | 851.8672  |
| 855.9045  | 871.4176  | 881.2701  |
| 889.5905  | 901.4493  | 922.7839  |
| 937.4392  | 938.5589  | 940.8673  |
| 953.9009  | 962.2786  | 967.1535  |
| 972.1746  | 972.3957  | 982.3758  |
| 983.7422  | 1000.5471 | 1001.7292 |
| 1016.6794 | 1025.9603 | 1028.5001 |
| 1049.3404 | 1055.2675 | 1058.1443 |
| 1064.6155 | 1071.2218 | 1075.7265 |
| 1084.6670 | 1090.6793 | 1104.5051 |
| 1126.8926 | 1135.9756 | 1139.0124 |
| 1145.2930 | 1145.7073 | 1179.0622 |

|           |           |           |
|-----------|-----------|-----------|
| 1187.5424 | 1194.1361 | 1195.1286 |
| 1208.4979 | 1223.4467 | 1238.9874 |
| 1244.4370 | 1248.1456 | 1252.5697 |
| 1256.3250 | 1260.9975 | 1268.6806 |
| 1278.8170 | 1281.4525 | 1293.3033 |
| 1294.0414 | 1295.6660 | 1316.1988 |
| 1319.5312 | 1327.4940 | 1338.0338 |
| 1352.4920 | 1356.9288 | 1365.6321 |
| 1388.6609 | 1393.2782 | 1405.5671 |
| 1410.7564 | 1412.1403 | 1415.9461 |
| 1416.0513 | 1418.0997 | 1422.0102 |
| 1424.7502 | 1426.9801 | 1432.6985 |
| 1438.1057 | 1438.6314 | 1445.8987 |
| 1452.1782 | 1463.6947 | 1467.7662 |
| 1477.1599 | 1478.9190 | 1480.3837 |
| 1487.8690 | 1493.2350 | 1494.9509 |
| 1496.9724 | 1497.2824 | 1500.6526 |
| 1501.2750 | 1502.6817 | 1506.5289 |
| 1506.9276 | 1508.8990 | 1512.2209 |
| 1513.9705 | 1521.4559 | 1529.4996 |
| 1531.2671 | 1547.5276 | 1552.3282 |
| 1556.8063 | 1578.4878 | 1579.2963 |
| 1593.3634 | 1617.6799 | 1647.6507 |
| 1649.7404 | 1652.5350 | 1673.9000 |
| 1719.5997 | 1789.6168 | 1800.0193 |
| 3014.8384 | 3026.8046 | 3032.7789 |
| 3036.5233 | 3043.9998 | 3047.3536 |
| 3051.2714 | 3053.2485 | 3056.6702 |
| 3064.5058 | 3091.2252 | 3102.6428 |
| 3104.2740 | 3106.5031 | 3107.6250 |
| 3111.5756 | 3116.0817 | 3117.7298 |



|           |           |           |
|-----------|-----------|-----------|
| 3126.1268 | 3134.3713 | 3134.7380 |
| 3140.4419 | 3157.7864 | 3160.7076 |
| 3171.1796 | 3175.5533 | 3175.9761 |
| 3182.4843 | 3182.7150 | 3188.5641 |
| 3192.1555 | 3201.9911 | 3205.9464 |
| 3206.7925 | 3218.2711 | 3231.5614 |
| 3250.7389 | 3347.4030 | 3503.4429 |
| 3728.4699 | 3796.2274 | 3800.5176 |

### M3

Zero-point correction= 0.699911

Thermal correction to Energy= 0.743566

Thermal correction to Enthalpy= 0.744510

Thermal correction to Gibbs Free Energy= 0.623749

Sum of electronic and zero-point Energies= -2009.710726

Sum of electronic and thermal Energies= -2009.667071

Sum of electronic and thermal Enthalpies= -2009.666126

Sum of electronic and thermal Free Energies= -2009.786888

### Cartesian coordinates

|   |          |           |           |
|---|----------|-----------|-----------|
| C | 1.484940 | -3.489569 | 0.593538  |
| C | 0.880262 | -2.703931 | -0.435761 |
| C | 1.370722 | -1.348148 | -0.528821 |
| C | 2.475003 | -0.929658 | 0.254324  |
| C | 3.042390 | -1.780598 | 1.195477  |
| N | 2.489766 | -3.036674 | 1.346426  |
| H | 1.120690 | -4.490559 | 0.778984  |
| C | 3.063349 | 0.431132  | 0.039023  |
| C | 4.123122 | 0.585334  | -0.910472 |
| C | 2.559310 | 1.538120  | 0.704155  |
| C | 4.669094 | -0.511499 | -1.634057 |

|   |           |           |           |
|---|-----------|-----------|-----------|
| C | 4.662443  | 1.895079  | -1.138525 |
| C | 3.084518  | 2.831993  | 0.452182  |
| C | 5.698112  | -0.321952 | -2.529159 |
| H | 4.268146  | -1.506593 | -1.475719 |
| C | 5.724687  | 2.053637  | -2.069020 |
| C | 4.117345  | 3.002540  | -0.437538 |
| H | 2.667335  | 3.681735  | 0.982687  |
| C | 6.233408  | 0.970787  | -2.749231 |
| H | 6.103821  | -1.170206 | -3.071573 |
| H | 6.127449  | 3.048857  | -2.233929 |
| H | 4.527698  | 3.991844  | -0.617637 |
| H | 7.044886  | 1.103367  | -3.457841 |
| C | 0.633869  | -0.404050 | -1.314178 |
| O | -0.042263 | -3.184777 | -1.161288 |
| C | 4.172145  | -1.376863 | 2.095597  |
| H | 4.593034  | -0.433819 | 1.752999  |
| H | 3.813934  | -1.223506 | 3.118769  |
| H | 4.974108  | -2.118752 | 2.114240  |
| C | 1.427310  | 1.364253  | 1.684931  |
| O | 1.518465  | 0.620208  | 2.666017  |
| N | 0.321381  | 2.076254  | 1.369500  |
| H | 0.321581  | 2.549671  | 0.478539  |
| C | -0.970845 | 1.925569  | 2.050405  |
| C | -1.499274 | 0.498939  | 1.861544  |
| H | -0.790078 | -0.180947 | 2.347316  |
| H | -2.457619 | 0.376172  | 2.377401  |
| O | -1.614078 | 0.171567  | 0.482018  |
| H | -1.778617 | -0.800273 | 0.479188  |
| C | -1.922042 | 3.093702  | 1.643310  |
| C | -2.138099 | 3.179534  | 0.116872  |
| H | -1.222502 | 3.451408  | -0.423202 |

|   |           |           |           |
|---|-----------|-----------|-----------|
| H | -2.503039 | 2.234633  | -0.285888 |
| H | -2.867664 | 3.965833  | -0.105254 |
| C | -1.316214 | 4.419722  | 2.148751  |
| H | -1.960166 | 5.261310  | 1.872911  |
| H | -1.214907 | 4.415062  | 3.239841  |
| H | -0.325627 | 4.602432  | 1.720633  |
| C | -3.291024 | 2.888839  | 2.319826  |
| H | -3.184217 | 2.722125  | 3.397597  |
| H | -3.911623 | 3.779438  | 2.177520  |
| H | -3.831349 | 2.038470  | 1.894874  |
| C | -2.733588 | -0.331669 | -2.216684 |
| O | -2.965671 | -1.515051 | -2.062665 |
| O | -3.578634 | 0.680377  | -2.105973 |
| C | -1.341437 | 0.165869  | -2.619014 |
| H | -1.276943 | 0.164415  | -3.712638 |
| H | -1.163760 | 1.174001  | -2.247597 |
| N | -0.368455 | -0.759119 | -2.062105 |
| H | -0.590188 | -1.775416 | -2.035776 |
| C | -4.983362 | 0.466005  | -1.637536 |
| C | -5.492438 | 1.897418  | -1.485067 |
| H | -5.394268 | 2.444600  | -2.426914 |
| H | -6.547649 | 1.881788  | -1.199283 |
| H | -4.929904 | 2.426575  | -0.711946 |
| C | -5.748451 | -0.289235 | -2.722365 |
| H | -5.711929 | 0.255337  | -3.670520 |
| H | -5.332249 | -1.287312 | -2.865714 |
| H | -6.795706 | -0.387643 | -2.421309 |
| C | -4.971046 | -0.265658 | -0.294278 |
| H | -4.780922 | -1.332271 | -0.407514 |
| H | -4.193198 | 0.146161  | 0.352053  |
| H | -5.943115 | -0.130903 | 0.190127  |

|   |           |           |           |
|---|-----------|-----------|-----------|
| C | 3.030400  | -3.939105 | 2.390670  |
| H | 2.417839  | -4.835828 | 2.430866  |
| H | 4.057624  | -4.206497 | 2.141945  |
| H | 3.002605  | -3.432526 | 3.354551  |
| H | 0.874218  | 0.651303  | -1.254842 |
| H | -1.760637 | -3.016493 | 0.058805  |
| C | -3.259107 | -2.732424 | 1.304378  |
| O | -3.871397 | -3.614116 | 0.667565  |
| O | -3.591899 | -2.019054 | 2.267645  |
| O | -1.914873 | -2.480877 | 0.854335  |
| H | -0.776170 | 2.028885  | 3.125604  |

#### Vibrational frequencies

|          |          |          |
|----------|----------|----------|
| 18.9596  | 27.3266  | 33.0821  |
| 39.9857  | 42.9283  | 50.2312  |
| 51.1273  | 56.9578  | 60.4750  |
| 65.6098  | 73.6799  | 75.1485  |
| 83.5894  | 85.7385  | 93.0725  |
| 94.4011  | 101.0330 | 105.8744 |
| 119.8618 | 123.6746 | 128.6331 |
| 131.3361 | 139.2697 | 142.4675 |
| 145.1754 | 159.0089 | 185.3809 |
| 188.0039 | 199.0407 | 208.5160 |
| 225.8986 | 230.5977 | 231.1526 |
| 237.2912 | 250.9081 | 255.6613 |
| 265.6452 | 275.6925 | 281.2700 |
| 296.3329 | 300.6668 | 302.2962 |
| 305.6533 | 315.5505 | 319.2810 |
| 334.5502 | 340.8988 | 342.9774 |
| 357.6852 | 360.0723 | 377.2507 |
| 384.0327 | 393.2421 | 399.8082 |

|           |           |           |
|-----------|-----------|-----------|
| 402.4343  | 412.5238  | 413.5420  |
| 434.1593  | 438.9601  | 446.7412  |
| 455.7727  | 463.5456  | 478.2076  |
| 484.4856  | 498.8208  | 503.0693  |
| 525.1184  | 534.1004  | 552.5008  |
| 563.6305  | 567.8264  | 571.3530  |
| 584.8316  | 603.0077  | 611.6500  |
| 634.8653  | 641.1804  | 654.6478  |
| 662.5331  | 672.9772  | 687.2895  |
| 708.6870  | 740.7217  | 743.7088  |
| 750.5719  | 756.9615  | 765.5639  |
| 774.6534  | 780.8287  | 790.2567  |
| 797.1816  | 807.4539  | 824.3255  |
| 834.1498  | 840.5145  | 851.2546  |
| 869.8336  | 872.4803  | 875.9083  |
| 883.1301  | 890.0643  | 905.4040  |
| 916.8769  | 934.0735  | 939.2808  |
| 940.6520  | 942.6598  | 952.9459  |
| 959.5279  | 969.3489  | 971.2495  |
| 977.6202  | 987.1225  | 988.8315  |
| 996.9199  | 1007.8898 | 1019.2388 |
| 1027.1609 | 1039.5094 | 1048.9489 |
| 1056.1707 | 1059.6110 | 1064.8557 |
| 1068.2578 | 1077.4140 | 1086.5406 |
| 1108.7718 | 1117.6726 | 1135.9700 |
| 1141.6704 | 1148.5143 | 1152.8276 |
| 1161.7523 | 1182.1357 | 1187.7394 |
| 1190.4877 | 1198.5624 | 1210.4013 |
| 1224.0171 | 1236.1298 | 1246.1579 |
| 1251.5446 | 1256.2114 | 1259.4345 |
| 1268.5075 | 1277.2334 | 1285.6817 |

|           |           |           |
|-----------|-----------|-----------|
| 1287.7782 | 1296.6350 | 1298.6275 |
| 1306.1785 | 1327.6438 | 1337.5065 |
| 1341.7617 | 1359.3458 | 1364.7563 |
| 1376.4361 | 1397.6850 | 1401.8166 |
| 1407.5223 | 1409.2102 | 1413.4577 |
| 1415.6787 | 1418.7106 | 1419.6020 |
| 1422.8923 | 1430.3070 | 1440.0842 |
| 1441.9131 | 1449.9988 | 1455.8636 |
| 1467.4698 | 1473.9863 | 1478.7797 |
| 1481.2038 | 1485.8325 | 1489.8938 |
| 1493.9327 | 1495.9729 | 1496.7240 |
| 1498.4113 | 1502.2315 | 1503.0406 |
| 1505.9862 | 1506.8461 | 1507.3515 |
| 1510.6239 | 1514.6955 | 1517.6856 |
| 1521.3491 | 1533.5776 | 1538.7511 |
| 1543.6065 | 1548.5967 | 1553.8781 |
| 1558.1178 | 1596.2661 | 1614.8929 |
| 1645.7098 | 1660.8654 | 1672.3342 |
| 1710.7615 | 1727.4628 | 1792.6214 |
| 1801.0449 | 3028.6528 | 3034.9039 |
| 3038.9107 | 3041.6893 | 3052.3499 |
| 3053.8499 | 3057.1602 | 3061.1332 |
| 3065.2008 | 3071.4327 | 3086.0961 |
| 3087.0367 | 3095.2548 | 3105.1875 |
| 3108.9143 | 3114.0853 | 3124.4559 |
| 3125.9356 | 3126.0232 | 3135.0030 |
| 3136.1147 | 3141.8850 | 3146.3811 |
| 3157.2241 | 3168.4447 | 3171.6871 |
| 3175.7274 | 3182.2684 | 3183.0173 |
| 3187.0871 | 3191.4690 | 3195.8371 |
| 3208.1505 | 3210.1798 | 3210.4409 |

|           |           |           |
|-----------|-----------|-----------|
| 3217.2938 | 3228.2563 | 3259.1404 |
| 3428.1884 | 3644.9356 | 3744.8456 |

#### TS4

Zero-point correction= 0.694577

Thermal correction to Energy= 0.737850

Thermal correction to Enthalpy= 0.738794

Thermal correction to Gibbs Free Energy= 0.617269

Sum of electronic and zero-point Energies= -2009.709134

Sum of electronic and thermal Energies= -2009.665861

Sum of electronic and thermal Enthalpies= -2009.664916

Sum of electronic and thermal Free Energies= -2009.786442

#### Cartesian coordinates

|   |          |           |           |
|---|----------|-----------|-----------|
| C | 1.543344 | -1.180533 | 3.631710  |
| C | 0.453105 | -1.036344 | 2.729446  |
| C | 0.810132 | -1.106684 | 1.326239  |
| C | 2.167522 | -1.202956 | 0.948522  |
| C | 3.178555 | -1.319128 | 1.900980  |
| N | 2.818096 | -1.311917 | 3.224328  |
| H | 1.356076 | -1.169768 | 4.696508  |
| C | 2.529871 | -1.061679 | -0.498226 |
| C | 2.613703 | -2.202257 | -1.352497 |
| C | 2.708865 | 0.212527  | -1.017835 |
| C | 2.430848 | -3.528049 | -0.870161 |
| C | 2.888505 | -2.005736 | -2.746871 |
| C | 2.959359 | 0.398636  | -2.400072 |
| C | 2.522942 | -4.605099 | -1.723009 |
| H | 2.220558 | -3.681880 | 0.183193  |
| C | 2.976485 | -3.140614 | -3.597946 |
| C | 3.053798 | -0.684926 | -3.241255 |

|   |           |           |           |
|---|-----------|-----------|-----------|
| H | 3.079635  | 1.407017  | -2.782973 |
| C | 2.798771  | -4.411433 | -3.099349 |
| H | 2.383828  | -5.611371 | -1.340080 |
| H | 3.185819  | -2.985649 | -4.652640 |
| H | 3.253173  | -0.541562 | -4.299326 |
| H | 2.867945  | -5.270589 | -3.759278 |
| C | -0.229480 | -1.093074 | 0.332114  |
| O | -0.732035 | -0.856594 | 3.152205  |
| C | 4.635388  | -1.381855 | 1.547626  |
| H | 4.746846  | -1.533196 | 0.475485  |
| H | 5.131618  | -0.439495 | 1.800456  |
| H | 5.151997  | -2.198327 | 2.058366  |
| C | 2.618301  | 1.398397  | -0.087986 |
| O | 3.403088  | 1.544055  | 0.855181  |
| N | 1.594853  | 2.241745  | -0.364463 |
| H | 0.931596  | 1.938014  | -1.074268 |
| C | 1.143463  | 3.251362  | 0.600834  |
| C | 0.078784  | 2.609818  | 1.516424  |
| H | 0.557864  | 1.752384  | 2.012229  |
| H | -0.212816 | 3.314196  | 2.299549  |
| O | -1.121626 | 2.209604  | 0.865819  |
| H | -0.890471 | 1.622210  | 0.126033  |
| C | 0.777137  | 4.593212  | -0.100868 |
| C | 0.239980  | 5.584406  | 0.948353  |
| H | -0.739264 | 5.279943  | 1.329608  |
| H | 0.925363  | 5.676686  | 1.798832  |
| H | 0.126265  | 6.577456  | 0.501260  |
| C | -0.277429 | 4.413617  | -1.210074 |
| H | -0.525068 | 5.385994  | -1.648816 |
| H | 0.101452  | 3.782174  | -2.018676 |
| H | -1.191158 | 3.963217  | -0.819236 |



|   |           |           |           |
|---|-----------|-----------|-----------|
| C | 2.063594  | 5.171794  | -0.723546 |
| H | 2.499941  | 4.472809  | -1.443586 |
| H | 1.847519  | 6.109096  | -1.247334 |
| H | 2.815940  | 5.381229  | 0.045338  |
| C | -3.868991 | -1.066538 | 0.539609  |
| O | -3.990014 | -0.825999 | 1.737107  |
| O | -4.876343 | -1.365838 | -0.306466 |
| C | -2.600959 | -0.980863 | -0.195485 |
| H | -2.734394 | 0.241088  | -0.970255 |
| N | -1.485322 | -0.960879 | 0.664252  |
| H | -0.843764 | 2.308236  | -3.639591 |
| C | -6.286944 | -1.341397 | 0.122443  |
| C | -7.031942 | -1.686548 | -1.167592 |
| H | -6.725588 | -2.669664 | -1.536474 |
| H | -8.109661 | -1.703750 | -0.982993 |
| H | -6.822088 | -0.943374 | -1.942160 |
| C | -6.527177 | -2.409350 | 1.192404  |
| H | -6.195496 | -3.387108 | 0.830022  |
| H | -5.988999 | -2.170418 | 2.109419  |
| H | -7.597289 | -2.469604 | 1.413212  |
| C | -6.657296 | 0.063931  | 0.603665  |
| H | -6.132355 | 0.314568  | 1.525529  |
| H | -6.400620 | 0.801657  | -0.162681 |
| H | -7.735253 | 0.115028  | 0.784420  |
| C | -1.698879 | 1.387374  | -2.241044 |
| O | -2.862815 | 1.101873  | -1.771375 |
| O | -0.607983 | 1.029904  | -1.759809 |
| O | -1.756833 | 2.149423  | -3.353149 |
| C | 3.866401  | -1.428521 | 4.262127  |
| H | 3.403793  | -1.336466 | 5.241525  |
| H | 4.355327  | -2.399810 | 4.180571  |

|   |           |           |           |
|---|-----------|-----------|-----------|
| H | 4.601445  | -0.634473 | 4.130935  |
| H | 0.007564  | -1.213393 | -0.718072 |
| H | -2.492117 | -1.661947 | -1.038568 |
| H | -1.634910 | -0.812393 | 1.689653  |
| H | 2.004305  | 3.448224  | 1.247868  |

Vibrational frequencies

|            |          |          |
|------------|----------|----------|
| -1251.4982 | 15.6478  | 23.9644  |
| 25.2496    | 29.6622  | 33.6671  |
| 38.5861    | 44.8894  | 51.3282  |
| 54.3045    | 56.9589  | 63.2100  |
| 67.6539    | 77.8493  | 82.3159  |
| 89.6756    | 103.0277 | 112.7302 |
| 121.1228   | 123.6620 | 129.4972 |
| 140.6332   | 141.7383 | 149.6634 |
| 155.8025   | 162.4499 | 178.6110 |
| 179.8424   | 193.0703 | 197.5477 |
| 212.9323   | 218.9379 | 233.0072 |
| 237.0694   | 245.9175 | 250.2883 |
| 259.7177   | 268.0348 | 277.2306 |
| 287.2923   | 289.4210 | 297.0341 |
| 314.7732   | 318.2485 | 323.8104 |
| 325.8635   | 332.3080 | 342.6590 |
| 362.0261   | 367.2498 | 381.4719 |
| 384.6458   | 391.5843 | 401.0084 |
| 405.5303   | 410.7844 | 414.3907 |
| 432.7722   | 438.7080 | 442.9838 |
| 446.6657   | 457.4595 | 470.4941 |
| 478.9553   | 486.1103 | 511.9980 |
| 518.8181   | 534.3909 | 555.2525 |
| 564.6056   | 570.1831 | 573.5279 |

|           |           |           |
|-----------|-----------|-----------|
| 584.8459  | 604.4745  | 609.5067  |
| 626.2886  | 643.5332  | 661.0526  |
| 670.1007  | 681.4377  | 688.8463  |
| 709.4464  | 717.5316  | 737.3944  |
| 741.8228  | 748.0870  | 760.6083  |
| 763.8136  | 767.4258  | 778.8995  |
| 792.0295  | 797.3294  | 810.1576  |
| 811.5149  | 827.1757  | 849.1569  |
| 850.2954  | 866.8321  | 878.3832  |
| 886.5587  | 892.3009  | 911.1211  |
| 913.0035  | 925.7026  | 935.8904  |
| 937.3117  | 942.7840  | 955.6265  |
| 962.8195  | 968.9414  | 970.0496  |
| 980.5162  | 980.7574  | 981.0901  |
| 1005.7571 | 1012.6653 | 1020.6952 |
| 1032.6926 | 1051.4142 | 1052.5013 |
| 1055.4759 | 1058.0499 | 1061.7625 |
| 1063.6177 | 1070.2856 | 1081.3579 |
| 1085.0093 | 1097.0287 | 1126.0951 |
| 1132.3850 | 1145.2203 | 1153.2711 |
| 1178.0685 | 1181.6631 | 1189.3594 |
| 1196.7168 | 1205.1591 | 1213.8351 |
| 1229.3389 | 1231.5162 | 1244.8059 |
| 1246.4595 | 1249.5951 | 1257.4621 |
| 1259.6171 | 1265.0430 | 1275.1579 |
| 1286.7159 | 1292.2203 | 1293.9473 |
| 1313.1653 | 1323.2284 | 1333.1992 |
| 1351.2058 | 1355.8819 | 1366.2984 |
| 1378.2200 | 1397.8484 | 1404.8996 |
| 1409.0190 | 1409.8224 | 1410.6519 |
| 1413.7848 | 1416.4167 | 1417.2609 |

|           |           |           |
|-----------|-----------|-----------|
| 1419.8294 | 1428.2502 | 1435.2521 |
| 1438.0901 | 1440.2266 | 1447.1767 |
| 1450.1904 | 1458.0786 | 1469.8792 |
| 1479.5792 | 1480.2099 | 1484.4068 |
| 1487.5932 | 1492.5761 | 1494.8097 |
| 1496.7940 | 1498.4414 | 1500.6877 |
| 1501.3924 | 1502.0180 | 1507.7673 |
| 1510.2679 | 1512.0879 | 1513.7144 |
| 1515.4961 | 1528.6922 | 1532.6962 |
| 1536.4710 | 1550.1686 | 1555.1918 |
| 1578.9386 | 1586.4954 | 1588.5350 |
| 1612.9242 | 1641.1307 | 1644.6432 |
| 1673.0263 | 1685.6232 | 1721.3491 |
| 1731.1418 | 1739.7261 | 3011.2122 |
| 3032.5843 | 3036.1628 | 3036.6793 |
| 3049.8948 | 3051.8237 | 3053.0273 |
| 3058.9020 | 3060.6959 | 3082.1080 |
| 3090.8438 | 3102.0448 | 3105.7186 |
| 3106.3890 | 3114.5403 | 3117.3066 |
| 3118.6116 | 3122.4656 | 3123.5620 |
| 3125.2072 | 3129.9639 | 3135.0845 |
| 3148.2054 | 3154.0960 | 3164.7622 |
| 3167.6464 | 3175.7907 | 3176.4821 |
| 3184.2872 | 3188.4973 | 3192.5651 |
| 3202.2895 | 3203.8305 | 3207.0061 |
| 3213.2461 | 3237.4081 | 3254.2661 |
| 3489.1706 | 3692.3766 | 3789.6823 |

#### **M4**

Zero-point correction= 0.657782

Thermal correction to Energy= 0.696251

Thermal correction to Enthalpy= 0.697195

Thermal correction to Gibbs Free Energy= 0.587507

Sum of electronic and zero-point Energies= -1744.714732

Sum of electronic and thermal Energies= -1744.676263

Sum of electronic and thermal Enthalpies= -1744.675319

Sum of electronic and thermal Free Energies= -1744.785007

Cartesian coordinates

|   |           |           |           |
|---|-----------|-----------|-----------|
| C | -1.421699 | 0.493512  | -3.471398 |
| C | -0.437687 | -0.074901 | -2.644567 |
| C | -0.891293 | -0.502159 | -1.327974 |
| C | -2.221381 | -0.216116 | -0.938445 |
| C | -3.126636 | 0.389549  | -1.808037 |
| N | -2.702814 | 0.709781  | -3.066187 |
| H | -1.165088 | 0.799840  | -4.476079 |
| C | -2.627913 | -0.503305 | 0.472829  |
| C | -3.338710 | -1.703899 | 0.786041  |
| C | -2.250299 | 0.359229  | 1.496045  |
| C | -3.721330 | -2.638288 | -0.217211 |
| C | -3.681591 | -1.984042 | 2.150477  |
| C | -2.584859 | 0.066428  | 2.845077  |
| C | -4.415392 | -3.780885 | 0.111101  |
| H | -3.457217 | -2.437627 | -1.249827 |
| C | -4.400230 | -3.172140 | 2.454376  |
| C | -3.289434 | -1.069921 | 3.162183  |
| H | -2.296943 | 0.764404  | 3.624969  |
| C | -4.760901 | -4.051139 | 1.458614  |
| H | -4.700465 | -4.482586 | -0.666719 |
| H | -4.658345 | -3.374529 | 3.490066  |
| H | -3.554678 | -1.279687 | 4.194283  |
| H | -5.309145 | -4.956027 | 1.701921  |

|   |           |           |           |
|---|-----------|-----------|-----------|
| C | 0.019600  | -1.141354 | -0.439006 |
| O | 0.780545  | -0.200518 | -3.033785 |
| C | -4.527910 | 0.755804  | -1.410267 |
| H | -4.720258 | 0.438233  | -0.387542 |
| H | -4.681735 | 1.839041  | -1.456199 |
| H | -5.275074 | 0.283470  | -2.055804 |
| C | -1.499409 | 1.628947  | 1.181559  |
| O | -1.913545 | 2.411370  | 0.310539  |
| N | -0.389880 | 1.824461  | 1.928615  |
| H | -0.135745 | 1.063038  | 2.541794  |
| C | 0.578513  | 2.942369  | 1.874000  |
| C | -0.099261 | 4.313623  | 1.670461  |
| H | -0.973258 | 4.351562  | 2.340688  |
| H | 0.602577  | 5.076265  | 2.018998  |
| O | -0.444525 | 4.655129  | 0.342223  |
| H | -1.050093 | 3.935600  | 0.064876  |
| C | 1.797976  | 2.622221  | 0.944865  |
| C | 1.374210  | 2.316307  | -0.503138 |
| H | 0.621393  | 1.529093  | -0.533034 |
| H | 0.961644  | 3.201343  | -0.988065 |
| H | 2.236331  | 1.963238  | -1.079001 |
| C | 2.533434  | 1.391873  | 1.516621  |
| H | 3.414294  | 1.160724  | 0.909187  |
| H | 2.869278  | 1.566815  | 2.545587  |
| H | 1.900091  | 0.500542  | 1.507224  |
| C | 2.763280  | 3.822250  | 0.955945  |
| H | 3.052381  | 4.097207  | 1.977265  |
| H | 3.677116  | 3.568479  | 0.408535  |
| H | 2.316196  | 4.696485  | 0.475012  |
| C | 3.656130  | -1.516014 | -0.550838 |
| O | 3.922831  | -0.922381 | -1.600529 |

|   |           |           |           |
|---|-----------|-----------|-----------|
| O | 4.575968  | -2.024571 | 0.312097  |
| C | 2.326003  | -1.743497 | -0.057494 |
| N | 1.309948  | -1.234704 | -0.762299 |
| H | 1.488850  | -0.812135 | -1.724555 |
| C | 6.013978  | -1.793102 | 0.126623  |
| C | 6.626213  | -2.491013 | 1.342745  |
| H | 6.380460  | -3.556953 | 1.337166  |
| H | 7.714611  | -2.384329 | 1.327860  |
| H | 6.245434  | -2.051432 | 2.269200  |
| C | 6.495008  | -2.449219 | -1.171216 |
| H | 6.212674  | -3.506461 | -1.184143 |
| H | 6.059800  | -1.956048 | -2.039872 |
| H | 7.585935  | -2.384571 | -1.231784 |
| C | 6.308002  | -0.289600 | 0.162860  |
| H | 5.867536  | 0.215912  | -0.696758 |
| H | 5.901273  | 0.150086  | 1.079018  |
| H | 7.390096  | -0.126845 | 0.154462  |
| C | -3.635819 | 1.336937  | -4.020400 |
| H | -3.117093 | 1.502643  | -4.961758 |
| H | -4.491346 | 0.682424  | -4.193447 |
| H | -3.985222 | 2.294629  | -3.630866 |
| H | -0.293858 | -1.523226 | 0.525462  |
| H | 0.976547  | 2.989854  | 2.896026  |
| H | 2.136525  | -2.198193 | 0.906022  |

Vibrational frequencies

|         |          |          |
|---------|----------|----------|
| 20.7799 | 22.9238  | 28.2622  |
| 33.7864 | 38.7235  | 46.8713  |
| 58.1797 | 62.7924  | 64.5761  |
| 71.0905 | 82.5117  | 86.7084  |
| 97.6787 | 107.4673 | 112.6209 |

|           |           |           |
|-----------|-----------|-----------|
| 124.0693  | 128.4936  | 144.6944  |
| 149.3534  | 169.9240  | 175.5887  |
| 183.0833  | 195.8820  | 202.3900  |
| 217.7128  | 230.7042  | 235.3258  |
| 240.4097  | 251.2108  | 255.1866  |
| 263.7878  | 264.1058  | 286.1288  |
| 287.0114  | 296.8397  | 313.0111  |
| 323.9967  | 327.3763  | 333.2122  |
| 343.5269  | 347.7678  | 362.3024  |
| 367.5433  | 378.7366  | 379.6636  |
| 382.0664  | 389.2735  | 401.2968  |
| 403.9942  | 419.1370  | 423.2046  |
| 436.5590  | 443.2703  | 452.9180  |
| 459.5298  | 466.5048  | 482.5744  |
| 486.8125  | 511.4702  | 522.8887  |
| 535.5580  | 554.1295  | 567.0879  |
| 570.3520  | 585.8920  | 596.8559  |
| 604.8529  | 644.4491  | 658.3666  |
| 661.9029  | 691.3029  | 698.3318  |
| 706.7684  | 735.7914  | 739.5227  |
| 744.3500  | 751.8195  | 759.6304  |
| 764.7570  | 765.4537  | 776.0868  |
| 791.5732  | 795.4620  | 810.0962  |
| 819.4241  | 826.5203  | 839.0842  |
| 851.3790  | 854.7910  | 875.2257  |
| 889.5183  | 893.7991  | 913.7224  |
| 923.6925  | 932.7317  | 935.5924  |
| 943.6958  | 951.1100  | 956.6671  |
| 971.8681  | 974.2967  | 977.6945  |
| 985.7016  | 1006.8118 | 1009.9638 |
| 1028.6024 | 1035.0815 | 1049.6055 |



|           |           |           |
|-----------|-----------|-----------|
| 1054.3859 | 1056.8616 | 1059.6839 |
| 1068.6997 | 1074.3772 | 1079.0015 |
| 1094.7589 | 1122.6079 | 1134.5292 |
| 1140.9483 | 1142.9749 | 1155.0779 |
| 1165.4725 | 1185.2500 | 1191.3456 |
| 1206.3351 | 1223.9753 | 1225.7685 |
| 1236.1678 | 1248.0759 | 1251.1543 |
| 1261.3995 | 1266.6410 | 1272.2494 |
| 1275.4664 | 1285.6472 | 1288.9827 |
| 1291.3521 | 1297.7302 | 1314.5144 |
| 1331.1416 | 1352.5419 | 1360.2490 |
| 1368.0086 | 1387.1118 | 1397.8324 |
| 1402.8804 | 1405.7404 | 1409.8559 |
| 1410.8049 | 1411.3884 | 1414.8126 |
| 1417.7323 | 1424.8016 | 1429.1026 |
| 1432.4582 | 1440.6711 | 1448.1080 |
| 1465.1076 | 1469.9568 | 1478.4363 |
| 1481.4047 | 1485.1266 | 1489.0360 |
| 1494.4670 | 1495.1155 | 1495.6687 |
| 1498.0561 | 1500.4646 | 1500.9327 |
| 1501.5724 | 1506.0873 | 1508.5202 |
| 1509.4297 | 1511.7627 | 1516.3872 |
| 1519.3919 | 1527.0095 | 1532.7389 |
| 1539.1352 | 1548.4691 | 1552.9115 |
| 1568.4392 | 1569.9952 | 1580.6592 |
| 1611.4341 | 1644.2339 | 1672.0271 |
| 1675.5766 | 1705.3176 | 1706.6542 |
| 2740.5065 | 2985.4587 | 3032.7514 |
| 3034.1483 | 3039.2862 | 3048.1860 |
| 3050.2320 | 3052.2144 | 3056.6168 |
| 3062.6616 | 3081.8741 | 3098.2683 |

|           |           |           |
|-----------|-----------|-----------|
| 3100.6218 | 3107.3830 | 3108.0815 |
| 3118.8967 | 3120.6509 | 3124.1812 |
| 3125.9438 | 3127.8476 | 3133.1900 |
| 3144.7367 | 3159.4255 | 3162.9862 |
| 3168.8516 | 3179.6955 | 3182.2497 |
| 3183.7019 | 3187.9260 | 3193.2271 |
| 3194.5909 | 3205.0561 | 3205.7603 |
| 3214.8110 | 3218.4712 | 3236.9450 |
| 3247.8221 | 3536.6932 | 3630.3125 |

### TS5RR

Zero-point correction= 0.961467

Thermal correction to Energy= 1.018758

Thermal correction to Enthalpy= 1.019703

Thermal correction to Gibbs Free Energy= 0.868939

Sum of electronic and zero-point Energies= -2949.539480

Sum of electronic and thermal Energies= -2949.482189

Sum of electronic and thermal Enthalpies= -2949.481245

Sum of electronic and thermal Free Energies= -2949.632009

### Cartesian coordinates

|   |           |           |           |
|---|-----------|-----------|-----------|
| C | -2.453994 | -2.585058 | -3.413056 |
| C | -1.276206 | -2.294299 | -2.679767 |
| C | -1.490055 | -1.933588 | -1.290742 |
| C | -2.797901 | -1.929174 | -0.757074 |
| C | -3.895720 | -2.304248 | -1.533465 |
| N | -3.679371 | -2.599291 | -2.853623 |
| H | -2.380877 | -2.831327 | -4.463282 |
| C | -3.020667 | -1.506588 | 0.663505  |
| C | -2.772583 | -2.433246 | 1.727273  |
| C | -3.421801 | -0.209128 | 0.953309  |

|   |           |           |           |
|---|-----------|-----------|-----------|
| C | -2.329036 | -3.764844 | 1.490172  |
| C | -2.968453 | -2.010104 | 3.083587  |
| C | -3.593554 | 0.199924  | 2.301873  |
| C | -2.085697 | -4.626188 | 2.536736  |
| H | -2.181167 | -4.098430 | 0.468909  |
| C | -2.714792 | -2.926597 | 4.140052  |
| C | -3.388453 | -0.678036 | 3.337448  |
| H | -3.892102 | 1.223453  | 2.500888  |
| C | -2.279542 | -4.205885 | 3.875488  |
| H | -1.744110 | -5.636835 | 2.335660  |
| H | -2.865070 | -2.594599 | 5.163477  |
| H | -3.529634 | -0.357820 | 4.365704  |
| H | -2.084151 | -4.895785 | 4.690505  |
| C | -0.354261 | -1.631639 | -0.466311 |
| H | -0.473633 | -1.347999 | 0.570279  |
| O | -0.127113 | -2.353616 | -3.231623 |
| C | -5.294715 | -2.396602 | -0.998414 |
| H | -5.279991 | -2.277659 | 0.083152  |
| H | -5.921706 | -1.598735 | -1.404249 |
| H | -5.752733 | -3.362845 | -1.228267 |
| C | -3.699962 | 0.786758  | -0.151113 |
| O | -4.528853 | 0.546201  | -1.038856 |
| N | -2.999629 | 1.935484  | -0.041093 |
| H | -2.213972 | 1.934045  | 0.623085  |
| C | -2.928106 | 2.892019  | -1.139417 |
| C | -1.574746 | 2.703875  | -1.872713 |
| H | -1.632126 | 3.185829  | -2.855286 |
| H | -0.767722 | 3.193541  | -1.312857 |
| O | -1.276882 | 1.329954  | -2.054177 |
| H | -0.616716 | 1.105475  | -1.356541 |
| C | -3.213248 | 4.346622  | -0.661321 |

|   |           |           |           |
|---|-----------|-----------|-----------|
| C | -3.121978 | 5.306373  | -1.863972 |
| H | -2.100720 | 5.383140  | -2.249850 |
| H | -3.771272 | 4.977898  | -2.683866 |
| H | -3.437805 | 6.312753  | -1.568671 |
| C | -2.221326 | 4.799052  | 0.429511  |
| H | -2.477806 | 5.808792  | 0.768580  |
| H | -2.242672 | 4.133443  | 1.296300  |
| H | -1.190248 | 4.827645  | 0.063201  |
| C | -4.642886 | 4.397595  | -0.089815 |
| H | -4.747767 | 3.718666  | 0.761606  |
| H | -4.887066 | 5.410727  | 0.248220  |
| H | -5.380388 | 4.106807  | -0.846710 |
| N | 0.868171  | -1.803268 | -0.926403 |
| C | 2.023230  | -1.449264 | -0.270927 |
| C | 3.257725  | -1.994911 | -0.845571 |
| O | 3.328600  | -2.541702 | -1.939031 |
| O | 4.286576  | -1.742196 | -0.013833 |
| C | 5.639844  | -2.284795 | -0.244835 |
| C | 6.242036  | -1.703681 | -1.525336 |
| H | 5.658704  | -1.995386 | -2.398161 |
| H | 6.275619  | -0.612864 | -1.473164 |
| H | 7.265697  | -2.073459 | -1.639208 |
| C | 6.399098  | -1.798076 | 0.989484  |
| H | 5.940664  | -2.192454 | 1.900941  |
| H | 7.439180  | -2.132961 | 0.946447  |
| H | 6.385471  | -0.705421 | 1.038997  |
| C | 5.571049  | -3.813526 | -0.280122 |
| H | 6.584975  | -4.222967 | -0.310937 |
| H | 5.074290  | -4.188613 | 0.619651  |
| H | 5.025109  | -4.161104 | -1.157889 |
| P | 0.614338  | 1.608081  | 1.353523  |

|   |           |           |           |
|---|-----------|-----------|-----------|
| O | -0.839845 | 1.888034  | 1.678830  |
| C | 1.656398  | 3.095100  | 1.535098  |
| C | 1.980099  | 3.572654  | 2.814886  |
| C | 2.063162  | 3.821913  | 0.405845  |
| C | 2.703719  | 4.755866  | 2.962029  |
| H | 1.675534  | 3.014626  | 3.695736  |
| C | 2.782793  | 5.008379  | 0.556023  |
| H | 1.821709  | 3.454277  | -0.586127 |
| C | 3.104434  | 5.475279  | 1.832552  |
| H | 2.956177  | 5.115372  | 3.954948  |
| H | 3.095431  | 5.564531  | -0.322541 |
| H | 3.668111  | 6.396174  | 1.948055  |
| C | 1.269798  | 0.366295  | 2.518349  |
| C | 0.359822  | -0.587590 | 3.002681  |
| C | 2.636505  | 0.220471  | 2.802502  |
| C | 0.811607  | -1.691021 | 3.726176  |
| H | -0.699087 | -0.456612 | 2.806124  |
| C | 3.086848  | -0.883570 | 3.529462  |
| H | 3.349690  | 0.963006  | 2.458312  |
| C | 2.178026  | -1.844362 | 3.980837  |
| H | 0.097889  | -2.427017 | 4.083162  |
| H | 4.146436  | -0.994802 | 3.738265  |
| H | 2.533414  | -2.707024 | 4.536233  |
| N | 0.834482  | 1.059739  | -0.211688 |
| C | 2.061087  | 0.622299  | -0.569789 |
| C | 2.517822  | 0.712138  | -1.980547 |
| C | 1.653964  | 0.569248  | -3.077896 |
| C | 3.884321  | 0.933091  | -2.215231 |
| C | 2.158003  | 0.637623  | -4.376243 |
| H | 0.595120  | 0.416656  | -2.922737 |
| C | 4.383520  | 1.009938  | -3.514511 |

|   |           |           |           |
|---|-----------|-----------|-----------|
| H | 4.556021  | 1.046443  | -1.369359 |
| C | 3.519897  | 0.858247  | -4.601685 |
| H | 1.481590  | 0.518603  | -5.217799 |
| H | 5.442835  | 1.185644  | -3.676312 |
| H | 3.904092  | 0.912949  | -5.615985 |
| H | 1.962102  | -1.406824 | 0.808319  |
| C | -4.827036 | -2.949340 | -3.717908 |
| H | -5.252776 | -3.901356 | -3.398198 |
| H | -5.584824 | -2.168875 | -3.654210 |
| H | -4.480176 | -3.033973 | -4.744829 |
| H | 2.892998  | 0.729846  | 0.132910  |
| H | 0.892137  | -2.079420 | -1.940451 |
| H | -3.721713 | 2.607147  | -1.836423 |

Vibrational frequencies

|           |          |          |
|-----------|----------|----------|
| -301.5776 | 15.8645  | 19.1598  |
| 23.7559   | 29.0894  | 32.9018  |
| 35.0090   | 38.1706  | 39.0499  |
| 40.7108   | 45.9385  | 49.4724  |
| 52.4620   | 55.0915  | 59.7682  |
| 64.3326   | 65.9462  | 75.1973  |
| 76.8024   | 82.0617  | 88.8087  |
| 92.3256   | 95.8026  | 103.3567 |
| 116.7063  | 119.2398 | 125.9324 |
| 131.5867  | 135.2770 | 145.0118 |
| 146.4136  | 153.8792 | 156.2928 |
| 162.5641  | 179.4838 | 183.7778 |
| 189.5547  | 197.6948 | 201.2701 |
| 208.6376  | 216.7988 | 223.7320 |
| 232.6546  | 234.2621 | 239.3863 |
| 246.4016  | 250.3291 | 259.0812 |

|          |          |          |
|----------|----------|----------|
| 263.7664 | 273.3144 | 280.0728 |
| 284.2357 | 292.3954 | 295.7945 |
| 298.8131 | 301.2027 | 310.9374 |
| 313.3464 | 320.1276 | 332.8026 |
| 343.4400 | 349.0940 | 361.5638 |
| 366.1509 | 375.5143 | 380.6353 |
| 383.3147 | 387.9853 | 391.5458 |
| 399.1901 | 406.0962 | 407.5745 |
| 410.6366 | 411.2530 | 418.9507 |
| 419.6039 | 422.5365 | 435.8934 |
| 441.3575 | 443.6670 | 451.5301 |
| 459.9211 | 469.8300 | 482.1899 |
| 485.3236 | 501.6572 | 519.3283 |
| 521.9198 | 527.8621 | 532.1786 |
| 535.2283 | 545.4030 | 554.6626 |
| 557.2703 | 566.5046 | 569.3421 |
| 574.3673 | 591.0734 | 612.1691 |
| 628.6162 | 630.9694 | 631.3817 |
| 639.7989 | 647.9872 | 662.4703 |
| 673.8379 | 697.0823 | 697.7823 |
| 702.3634 | 711.9917 | 721.1153 |
| 732.3402 | 736.2596 | 738.0996 |
| 745.5865 | 749.0418 | 759.6374 |
| 766.6008 | 768.0674 | 768.6515 |
| 769.8119 | 775.5931 | 776.2016 |
| 793.5889 | 796.2716 | 812.1738 |
| 818.5572 | 834.0309 | 844.1820 |
| 847.9104 | 849.5600 | 864.9166 |
| 869.5201 | 871.3180 | 882.3819 |
| 884.9550 | 886.8945 | 889.2624 |
| 892.8795 | 912.0839 | 920.0381 |

|           |           |           |
|-----------|-----------|-----------|
| 922.9261  | 925.6742  | 934.9800  |
| 936.6725  | 939.3598  | 947.2794  |
| 949.0491  | 949.9763  | 957.4246  |
| 967.8288  | 971.3575  | 973.7404  |
| 977.5935  | 980.2749  | 981.3525  |
| 992.5219  | 998.4070  | 1003.4794 |
| 1003.9359 | 1012.2978 | 1013.9386 |
| 1014.3167 | 1015.3084 | 1019.1554 |
| 1024.9804 | 1030.6865 | 1034.8236 |
| 1049.9547 | 1050.8865 | 1051.6508 |
| 1055.9615 | 1057.7846 | 1058.1226 |
| 1058.9705 | 1063.4926 | 1072.3299 |
| 1081.6345 | 1089.9857 | 1092.0330 |
| 1096.7460 | 1106.0817 | 1111.0422 |
| 1117.0130 | 1121.4393 | 1131.3226 |
| 1134.3831 | 1138.6711 | 1145.3555 |
| 1155.0892 | 1164.7561 | 1179.2074 |
| 1182.3145 | 1188.6104 | 1192.5761 |
| 1193.9951 | 1195.0319 | 1204.1251 |
| 1213.0713 | 1214.6815 | 1215.6923 |
| 1222.7414 | 1224.2994 | 1226.7730 |
| 1239.9849 | 1246.5546 | 1247.9377 |
| 1254.1067 | 1263.8601 | 1273.5272 |
| 1276.0277 | 1279.9454 | 1285.3051 |
| 1289.1692 | 1295.0050 | 1314.8812 |
| 1324.9349 | 1328.4719 | 1332.0581 |
| 1333.6004 | 1347.1404 | 1352.2747 |
| 1358.6525 | 1360.5600 | 1361.7773 |
| 1364.3469 | 1373.5053 | 1383.7024 |
| 1402.8195 | 1408.5696 | 1410.2909 |
| 1412.0525 | 1412.6778 | 1413.7334 |



|           |           |           |
|-----------|-----------|-----------|
| 1417.7017 | 1422.9560 | 1424.5822 |
| 1427.4175 | 1436.3788 | 1439.0244 |
| 1447.5620 | 1459.9391 | 1461.1659 |
| 1466.8738 | 1472.9304 | 1476.6139 |
| 1479.3655 | 1481.7572 | 1482.0057 |
| 1486.1348 | 1493.0658 | 1494.7521 |
| 1495.3219 | 1496.1227 | 1499.4129 |
| 1501.4216 | 1501.8489 | 1504.1954 |
| 1507.3849 | 1509.6836 | 1509.7657 |
| 1512.1382 | 1518.1281 | 1520.3847 |
| 1521.8702 | 1524.2128 | 1525.6158 |
| 1529.0987 | 1532.5649 | 1544.2413 |
| 1550.1551 | 1552.8440 | 1577.4742 |
| 1609.0546 | 1620.7123 | 1622.4170 |
| 1624.6710 | 1626.1110 | 1636.0479 |
| 1642.2386 | 1644.7612 | 1646.7843 |
| 1655.5474 | 1670.8264 | 1672.5135 |
| 1716.1230 | 1743.0358 | 2955.0127 |
| 3025.8657 | 3030.7977 | 3033.9564 |
| 3044.2821 | 3050.2603 | 3055.7852 |
| 3063.8495 | 3064.1030 | 3069.2598 |
| 3070.6819 | 3089.6988 | 3090.1914 |
| 3099.1172 | 3103.1698 | 3107.3226 |
| 3111.4821 | 3118.2096 | 3126.0635 |
| 3128.3889 | 3130.7692 | 3131.5471 |
| 3132.7442 | 3137.4443 | 3159.6767 |
| 3172.9009 | 3175.0955 | 3178.5960 |
| 3179.7461 | 3183.0736 | 3184.0059 |
| 3186.1330 | 3186.5768 | 3188.6780 |
| 3189.1764 | 3193.6582 | 3194.2194 |
| 3195.6261 | 3197.9396 | 3200.1851 |

|           |           |           |
|-----------|-----------|-----------|
| 3202.9234 | 3206.3228 | 3206.4297 |
| 3207.0553 | 3210.4227 | 3211.7953 |
| 3212.9223 | 3215.9013 | 3218.2272 |
| 3237.2666 | 3252.4657 | 3254.9733 |
| 3260.4524 | 3272.1656 | 3391.6430 |

### TS5RR1

Zero-point correction= 0.961394

Thermal correction to Energy= 1.018873

Thermal correction to Enthalpy= 1.019817

Thermal correction to Gibbs Free Energy= 0.868725

Sum of electronic and zero-point Energies= -2949.512395

Sum of electronic and thermal Energies= -2949.454917

Sum of electronic and thermal Enthalpies= -2949.453972

Sum of electronic and thermal Free Energies= -2949.605065

### Cartesian coordinates

|   |           |           |           |
|---|-----------|-----------|-----------|
| C | -0.134126 | -2.668295 | -3.818800 |
| C | 0.713508  | -2.117722 | -2.822526 |
| C | 0.120396  | -2.028477 | -1.503843 |
| C | -1.166241 | -2.565831 | -1.259392 |
| C | -1.867723 | -3.225123 | -2.273009 |
| N | -1.333507 | -3.212810 | -3.535230 |
| H | 0.204671  | -2.711983 | -4.844650 |
| C | -1.715887 | -2.521379 | 0.136485  |
| C | -1.089373 | -3.356309 | 1.125316  |
| C | -2.733416 | -1.646268 | 0.517851  |
| C | -0.086996 | -4.313595 | 0.791821  |
| C | -1.468228 | -3.234313 | 2.502017  |
| C | -3.104947 | -1.561380 | 1.889529  |
| C | 0.517018  | -5.079485 | 1.763289  |

|   |           |           |           |
|---|-----------|-----------|-----------|
| H | 0.199572  | -4.442867 | -0.245064 |
| C | -0.819934 | -4.033368 | 3.482368  |
| C | -2.485020 | -2.314055 | 2.852859  |
| H | -3.901333 | -0.885191 | 2.175258  |
| C | 0.156628  | -4.933856 | 3.125184  |
| H | 1.275711  | -5.803562 | 1.482748  |
| H | -1.114466 | -3.918819 | 4.521754  |
| H | -2.773639 | -2.214750 | 3.894615  |
| H | 0.647522  | -5.538753 | 3.881204  |
| C | 0.909639  | -1.481585 | -0.429621 |
| H | 0.464213  | -1.312548 | 0.539557  |
| O | 1.902418  | -1.747620 | -3.097807 |
| C | -3.115462 | -4.025846 | -2.039077 |
| H | -3.387224 | -3.977268 | -0.987402 |
| H | -3.962347 | -3.641346 | -2.609840 |
| H | -2.956106 | -5.076423 | -2.306675 |
| C | -3.564691 | -0.847630 | -0.465471 |
| O | -3.935660 | -1.323381 | -1.542250 |
| N | -3.982223 | 0.360539  | -0.005299 |
| H | -3.406830 | 0.789281  | 0.706323  |
| C | -4.957669 | 1.208794  | -0.687988 |
| C | -4.261110 | 2.452231  | -1.272221 |
| H | -5.006779 | 3.099052  | -1.742276 |
| H | -3.791412 | 3.035484  | -0.464047 |
| O | -3.318230 | 2.112167  | -2.270915 |
| H | -2.556539 | 1.692638  | -1.802679 |
| C | -6.175822 | 1.501519  | 0.247165  |
| C | -5.743067 | 2.236916  | 1.531411  |
| H | -5.030011 | 1.647137  | 2.116881  |
| H | -5.284904 | 3.206788  | 1.312801  |
| H | -6.613293 | 2.420682  | 2.170262  |

|   |           |           |           |
|---|-----------|-----------|-----------|
| C | -6.833630 | 0.160974  | 0.628769  |
| H | -7.697580 | 0.332190  | 1.279802  |
| H | -7.182494 | -0.372559 | -0.262525 |
| H | -6.135107 | -0.491518 | 1.159460  |
| C | -7.217318 | 2.356930  | -0.501879 |
| H | -7.469592 | 1.913675  | -1.471942 |
| H | -8.139291 | 2.424089  | 0.085267  |
| H | -6.867262 | 3.378500  | -0.675387 |
| N | 2.220622  | -1.387182 | -0.529926 |
| C | 3.021639  | -0.758872 | 0.397550  |
| C | 4.465518  | -0.926335 | 0.153601  |
| O | 4.929134  | -1.345217 | -0.898959 |
| O | 5.165669  | -0.515543 | 1.222909  |
| C | 6.635006  | -0.675076 | 1.304408  |
| C | 7.327833  | 0.130106  | 0.204413  |
| H | 7.087574  | -0.264168 | -0.782431 |
| H | 7.017085  | 1.175691  | 0.245903  |
| H | 8.410733  | 0.080637  | 0.354844  |
| C | 6.950306  | -0.095932 | 2.683161  |
| H | 6.419263  | -0.648127 | 3.463725  |
| H | 8.024276  | -0.161577 | 2.877937  |
| H | 6.650634  | 0.954852  | 2.733428  |
| C | 6.978743  | -2.164881 | 1.239714  |
| H | 8.048748  | -2.299012 | 1.423395  |
| H | 6.425332  | -2.715117 | 2.006546  |
| H | 6.736081  | -2.578851 | 0.260323  |
| P | -0.216817 | 1.698644  | 0.057722  |
| O | -1.327906 | 1.151991  | -0.817166 |
| C | -0.144275 | 3.522381  | -0.040422 |
| C | 0.738938  | 4.244951  | 0.776694  |
| C | -0.949115 | 4.205996  | -0.961334 |

|   |           |           |           |
|---|-----------|-----------|-----------|
| C | 0.815804  | 5.633052  | 0.675500  |
| H | 1.365738  | 3.726107  | 1.497625  |
| C | -0.870597 | 5.598025  | -1.059533 |
| H | -1.634466 | 3.651747  | -1.594728 |
| C | 0.009536  | 6.311871  | -0.244292 |
| H | 1.500881  | 6.185494  | 1.311742  |
| H | -1.498174 | 6.123700  | -1.773414 |
| H | 0.068570  | 7.393456  | -0.322623 |
| C | -0.639241 | 1.374405  | 1.813620  |
| C | 0.081205  | 0.478629  | 2.610836  |
| C | -1.786930 | 1.985077  | 2.350443  |
| C | -0.342817 | 0.177100  | 3.907469  |
| H | 0.978534  | 0.011396  | 2.225519  |
| C | -2.216082 | 1.681567  | 3.641503  |
| H | -2.339246 | 2.710339  | 1.758517  |
| C | -1.494612 | 0.772090  | 4.421714  |
| H | 0.222382  | -0.528764 | 4.508025  |
| H | -3.108186 | 2.155648  | 4.039636  |
| H | -1.829379 | 0.532027  | 5.426144  |
| N | 1.234773  | 1.138917  | -0.395807 |
| C | 2.473090  | 1.232063  | 0.105232  |
| C | 3.547299  | 1.716462  | -0.810058 |
| C | 3.530301  | 1.395599  | -2.176854 |
| C | 4.571584  | 2.529047  | -0.309755 |
| C | 4.523383  | 1.884524  | -3.022208 |
| H | 2.744298  | 0.750818  | -2.557921 |
| C | 5.554235  | 3.035998  | -1.163470 |
| H | 4.591919  | 2.773844  | 0.748971  |
| C | 5.534859  | 2.712411  | -2.521046 |
| H | 4.509661  | 1.623554  | -4.076643 |
| H | 6.334802  | 3.678520  | -0.766462 |

|   |           |           |           |
|---|-----------|-----------|-----------|
| H | 6.301283  | 3.100747  | -3.185271 |
| H | 2.702951  | -0.848734 | 1.430166  |
| C | -2.087972 | -3.833576 | -4.645779 |
| H | -2.185626 | -4.905792 | -4.472297 |
| H | -3.077590 | -3.381979 | -4.712316 |
| H | -1.548850 | -3.665002 | -5.574678 |
| H | 2.633219  | 1.519485  | 1.151954  |
| H | 2.575853  | -1.537404 | -1.497844 |
| H | -5.317591 | 0.622284  | -1.537804 |

Vibrational frequencies

|           |          |          |
|-----------|----------|----------|
| -280.6017 | 12.9814  | 18.1083  |
| 24.5164   | 31.4198  | 33.6253  |
| 36.7530   | 39.0869  | 39.6691  |
| 44.2219   | 48.6457  | 50.1641  |
| 53.3391   | 60.2444  | 63.2260  |
| 67.1511   | 72.4780  | 74.3386  |
| 78.5263   | 82.2218  | 87.1189  |
| 89.3105   | 91.5169  | 100.8382 |
| 102.0779  | 111.8013 | 120.6974 |
| 129.1663  | 134.6813 | 136.9205 |
| 143.3056  | 151.0558 | 157.7163 |
| 165.1764  | 179.5439 | 192.0822 |
| 200.5381  | 201.4714 | 205.0140 |
| 208.2274  | 218.6320 | 221.8935 |
| 224.0728  | 237.5606 | 241.3370 |
| 244.8445  | 253.9025 | 261.5466 |
| 264.7931  | 266.6381 | 273.6653 |
| 274.3211  | 278.8774 | 291.6758 |
| 293.6432  | 297.2265 | 312.7629 |
| 317.3329  | 323.1338 | 332.3387 |

|          |          |          |
|----------|----------|----------|
| 337.5922 | 344.8597 | 355.1011 |
| 357.0177 | 365.1850 | 374.4423 |
| 377.8460 | 384.2931 | 389.1414 |
| 399.5865 | 405.7974 | 407.9013 |
| 411.9748 | 413.4931 | 418.3536 |
| 422.7607 | 432.7319 | 438.9628 |
| 443.3512 | 447.8519 | 455.1465 |
| 464.0469 | 470.5919 | 485.9281 |
| 491.3236 | 493.4872 | 500.4917 |
| 516.5996 | 523.0305 | 531.6134 |
| 535.4934 | 540.6229 | 547.3752 |
| 555.5315 | 559.5321 | 568.1407 |
| 575.7282 | 584.8736 | 591.0886 |
| 616.8672 | 628.9343 | 630.2102 |
| 630.9983 | 637.2782 | 643.0541 |
| 664.5367 | 674.5045 | 690.1152 |
| 703.7853 | 714.8688 | 716.8866 |
| 718.6231 | 726.4829 | 737.6280 |
| 745.7683 | 750.0742 | 752.1542 |
| 760.1833 | 764.5979 | 765.5705 |
| 773.2545 | 777.7544 | 778.4987 |
| 793.2429 | 797.2459 | 810.0990 |
| 812.1819 | 829.7169 | 831.1110 |
| 843.3432 | 847.0772 | 862.3065 |
| 867.5373 | 869.6991 | 879.5376 |
| 883.0103 | 887.4311 | 891.7754 |
| 906.2805 | 909.8666 | 914.9197 |
| 917.4760 | 922.5117 | 936.4110 |
| 938.7832 | 940.5527 | 942.5928 |
| 943.4625 | 945.8408 | 955.0265 |
| 967.4192 | 971.2388 | 974.0130 |

|           |           |           |
|-----------|-----------|-----------|
| 982.3497  | 982.6163  | 987.5825  |
| 989.8110  | 1001.5672 | 1004.7628 |
| 1007.9852 | 1010.2622 | 1012.5931 |
| 1013.6684 | 1014.6177 | 1024.4427 |
| 1027.5381 | 1032.1176 | 1041.4597 |
| 1048.5847 | 1050.3230 | 1051.1116 |
| 1051.4181 | 1056.0437 | 1059.0886 |
| 1060.4392 | 1065.5495 | 1068.1345 |
| 1080.2612 | 1082.0033 | 1094.4674 |
| 1109.0619 | 1109.2908 | 1111.2587 |
| 1114.9432 | 1121.0181 | 1127.0818 |
| 1131.0653 | 1133.1705 | 1144.1705 |
| 1153.8226 | 1170.0825 | 1181.3506 |
| 1182.0975 | 1188.3827 | 1190.2691 |
| 1192.9722 | 1193.2321 | 1203.4900 |
| 1210.3942 | 1214.5136 | 1215.3345 |
| 1218.1128 | 1224.5082 | 1230.9201 |
| 1243.6444 | 1246.4543 | 1249.9622 |
| 1252.7411 | 1262.5225 | 1267.8759 |
| 1274.4885 | 1274.9168 | 1278.0436 |
| 1290.9191 | 1291.7374 | 1307.2556 |
| 1326.6595 | 1328.5849 | 1331.5950 |
| 1334.9068 | 1341.4725 | 1344.3478 |
| 1352.6164 | 1360.2865 | 1364.7363 |
| 1366.0891 | 1375.6026 | 1383.0912 |
| 1400.2201 | 1408.8445 | 1412.1951 |
| 1412.4988 | 1413.8342 | 1414.8918 |
| 1416.6886 | 1422.6814 | 1429.6653 |
| 1432.4072 | 1436.8462 | 1437.3211 |
| 1446.5225 | 1458.5328 | 1461.7941 |
| 1464.4205 | 1473.8757 | 1475.4556 |



|           |           |           |
|-----------|-----------|-----------|
| 1475.8495 | 1479.4842 | 1479.9244 |
| 1485.5946 | 1490.2678 | 1493.1689 |
| 1495.5948 | 1496.8838 | 1497.2504 |
| 1498.0105 | 1502.2499 | 1502.8756 |
| 1505.2171 | 1506.7950 | 1511.8780 |
| 1513.1431 | 1513.7700 | 1517.6786 |
| 1520.4622 | 1525.0183 | 1528.5231 |
| 1530.6963 | 1533.7921 | 1536.4779 |
| 1548.3948 | 1551.6389 | 1563.8292 |
| 1575.4497 | 1608.5451 | 1625.7456 |
| 1627.5397 | 1631.1103 | 1636.5894 |
| 1644.0824 | 1645.0080 | 1648.1384 |
| 1653.6750 | 1664.8706 | 1672.4958 |
| 1723.6492 | 1745.9549 | 2990.3329 |
| 3024.1135 | 3034.6816 | 3036.7953 |
| 3043.7433 | 3050.8436 | 3053.0251 |
| 3056.5503 | 3065.9721 | 3091.0902 |
| 3092.3350 | 3101.1514 | 3102.9262 |
| 3106.4736 | 3108.4049 | 3112.9272 |
| 3114.9743 | 3119.2616 | 3124.8377 |
| 3126.3715 | 3129.5945 | 3133.4011 |
| 3135.2025 | 3144.2714 | 3160.3248 |
| 3174.1060 | 3174.4188 | 3174.4986 |
| 3174.5193 | 3175.7688 | 3181.1615 |
| 3183.5540 | 3184.1710 | 3187.9282 |
| 3189.1715 | 3190.5530 | 3193.7814 |
| 3194.2060 | 3196.1088 | 3196.9098 |
| 3198.6713 | 3200.9394 | 3202.6770 |
| 3204.3629 | 3206.8924 | 3208.2799 |
| 3209.2354 | 3210.3895 | 3222.8190 |
| 3225.0137 | 3235.2997 | 3252.8502 |

3265.3844

3379.9993

3619.5847

## TS5RR2

Zero-point correction= 0.961467

Thermal correction to Energy= 1.019109

Thermal correction to Enthalpy= 1.020054

Thermal correction to Gibbs Free Energy= 0.868829

Sum of electronic and zero-point Energies= -2949.507768

Sum of electronic and thermal Energies= -2949.450125

Sum of electronic and thermal Enthalpies= -2949.449181

Sum of electronic and thermal Free Energies= -2949.600406

## Cartesian coordinates

|   |           |           |           |
|---|-----------|-----------|-----------|
| C | -3.075664 | -1.232278 | -3.697849 |
| C | -2.096644 | -1.689030 | -2.774108 |
| C | -2.358401 | -1.353126 | -1.389426 |
| C | -3.507675 | -0.609387 | -1.044449 |
| C | -4.422645 | -0.207266 | -2.015420 |
| N | -4.160695 | -0.534057 | -3.321772 |
| H | -2.951614 | -1.439204 | -4.751676 |
| C | -3.759506 | -0.247854 | 0.388377  |
| C | -4.494533 | -1.172755 | 1.198177  |
| C | -3.278151 | 0.935438  | 0.941809  |
| C | -4.976745 | -2.411554 | 0.688489  |
| C | -4.755444 | -0.851496 | 2.570818  |
| C | -3.569966 | 1.247332  | 2.299547  |
| C | -5.674764 | -3.281839 | 1.495569  |
| H | -4.787001 | -2.670403 | -0.346967 |
| C | -5.480833 | -1.770080 | 3.375001  |
| C | -4.287852 | 0.383676  | 3.088432  |
| H | -3.249974 | 2.199144  | 2.709896  |

|   |           |           |           |
|---|-----------|-----------|-----------|
| C | -5.930440 | -2.960863 | 2.850950  |
| H | -6.033153 | -4.222897 | 1.090290  |
| H | -5.672819 | -1.514799 | 4.413103  |
| H | -4.509878 | 0.641991  | 4.119559  |
| H | -6.482201 | -3.657688 | 3.473988  |
| C | -1.417933 | -1.739836 | -0.384129 |
| H | -1.628771 | -1.558211 | 0.663331  |
| O | -1.067361 | -2.324779 | -3.167641 |
| C | -5.626192 | 0.634984  | -1.710201 |
| H | -5.784747 | 0.678892  | -0.634470 |
| H | -5.478108 | 1.660878  | -2.065001 |
| H | -6.537213 | 0.241415  | -2.167765 |
| C | -2.432954 | 1.875641  | 0.116628  |
| O | -2.577073 | 1.994673  | -1.103908 |
| N | -1.487889 | 2.554858  | 0.817089  |
| H | -1.360743 | 2.373131  | 1.802383  |
| C | -0.460710 | 3.396173  | 0.209899  |
| C | 0.888336  | 2.936293  | 0.793240  |
| H | 1.124527  | 1.957739  | 0.368260  |
| H | 1.690192  | 3.613252  | 0.490601  |
| O | 0.865185  | 2.868656  | 2.224696  |
| H | 0.900877  | 1.936922  | 2.484104  |
| C | -0.781089 | 4.919284  | 0.331259  |
| C | -0.793096 | 5.388099  | 1.797271  |
| H | -1.532587 | 4.832142  | 2.383254  |
| H | 0.180716  | 5.252801  | 2.273824  |
| H | -1.058211 | 6.449926  | 1.848004  |
| C | -2.164591 | 5.184402  | -0.294461 |
| H | -2.386222 | 6.256795  | -0.278617 |
| H | -2.203397 | 4.839551  | -1.332261 |
| H | -2.955251 | 4.670020  | 0.259216  |

|   |           |           |           |
|---|-----------|-----------|-----------|
| C | 0.273047  | 5.719323  | -0.458977 |
| H | 0.324985  | 5.384562  | -1.501083 |
| H | 0.011353  | 6.782561  | -0.462406 |
| H | 1.273031  | 5.631342  | -0.024128 |
| N | -0.274320 | -2.303348 | -0.690548 |
| C | 0.790301  | -2.546654 | 0.193259  |
| C | 1.838265  | -3.387738 | -0.433462 |
| O | 1.957470  | -3.515941 | -1.645869 |
| O | 2.628297  | -3.906220 | 0.503847  |
| C | 3.789144  | -4.768788 | 0.177980  |
| C | 4.744741  | -4.067793 | -0.788002 |
| H | 4.335518  | -4.034936 | -1.796752 |
| H | 4.931449  | -3.039471 | -0.472874 |
| H | 5.690756  | -4.618580 | -0.806646 |
| C | 4.441074  | -4.960535 | 1.546744  |
| H | 3.729191  | -5.392174 | 2.256005  |
| H | 5.298538  | -5.633294 | 1.458949  |
| H | 4.788927  | -4.001013 | 1.940050  |
| C | 3.260061  | -6.090751 | -0.380138 |
| H | 4.095770  | -6.775139 | -0.553684 |
| H | 2.571093  | -6.558538 | 0.329407  |
| H | 2.740727  | -5.927627 | -1.326199 |
| P | 3.669746  | -0.022390 | -0.903726 |
| O | 4.683167  | -0.811872 | -1.707662 |
| C | 4.499481  | 1.417360  | -0.122548 |
| C | 4.048233  | 1.948672  | 1.093286  |
| C | 5.574799  | 2.035080  | -0.778258 |
| C | 4.642319  | 3.090035  | 1.633893  |
| H | 3.231227  | 1.465759  | 1.617817  |
| C | 6.176392  | 3.172185  | -0.235538 |
| H | 5.937913  | 1.616927  | -1.712338 |

|   |           |           |           |
|---|-----------|-----------|-----------|
| C | 5.706139  | 3.704829  | 0.968467  |
| H | 4.273332  | 3.497097  | 2.570862  |
| H | 7.008736  | 3.643568  | -0.750274 |
| H | 6.170095  | 4.593036  | 1.387589  |
| C | 2.401294  | 0.729885  | -2.008226 |
| C | 2.250915  | 2.115863  | -2.172878 |
| C | 1.542225  | -0.128853 | -2.715747 |
| C | 1.263025  | 2.630546  | -3.016080 |
| H | 2.904065  | 2.798895  | -1.640260 |
| C | 0.553519  | 0.385364  | -3.556076 |
| H | 1.648185  | -1.205243 | -2.611717 |
| C | 0.408087  | 1.766862  | -3.703827 |
| H | 1.162945  | 3.705603  | -3.133397 |
| H | -0.099674 | -0.300687 | -4.082363 |
| H | -0.365407 | 2.167378  | -4.352493 |
| N | 2.943373  | -0.797351 | 0.336573  |
| C | 1.617626  | -0.855217 | 0.608603  |
| C | 1.255314  | -0.738020 | 2.068640  |
| C | 2.147893  | -1.150888 | 3.067044  |
| C | 0.012442  | -0.210886 | 2.452947  |
| C | 1.799375  | -1.048098 | 4.413046  |
| H | 3.114051  | -1.540191 | 2.766170  |
| C | -0.338676 | -0.105678 | 3.802680  |
| H | -0.681331 | 0.132304  | 1.693711  |
| C | 0.556232  | -0.525944 | 4.787616  |
| H | 2.501590  | -1.371446 | 5.176010  |
| H | -1.306473 | 0.305861  | 4.073385  |
| H | 0.291215  | -0.444214 | 5.837168  |
| H | 0.467705  | -2.886362 | 1.171828  |
| C | -5.096253 | -0.093015 | -4.380399 |
| H | -6.064696 | -0.572568 | -4.235554 |

|   |           |           |           |
|---|-----------|-----------|-----------|
| H | -5.211706 | 0.989918  | -4.338955 |
| H | -4.690913 | -0.378218 | -5.347787 |
| H | 0.928817  | -0.268191 | -0.018484 |
| H | -0.150141 | -2.465930 | -1.716358 |
| H | -0.449375 | 3.150023  | -0.856314 |

Vibrational frequencies

|           |          |          |
|-----------|----------|----------|
| -340.9198 | 14.6612  | 21.5828  |
| 24.4646   | 26.9374  | 32.4314  |
| 36.7466   | 39.8623  | 41.3429  |
| 42.5740   | 44.8038  | 46.9632  |
| 53.2386   | 58.6598  | 59.8949  |
| 60.1734   | 72.2499  | 75.1367  |
| 78.4142   | 81.3535  | 86.5611  |
| 92.6783   | 99.1576  | 107.2547 |
| 114.1588  | 116.8787 | 129.3945 |
| 130.5968  | 140.8327 | 144.7370 |
| 151.2844  | 153.5233 | 156.6844 |
| 160.5392  | 180.1368 | 185.8872 |
| 189.0893  | 190.7359 | 196.7587 |
| 212.7705  | 217.5521 | 226.7327 |
| 232.9387  | 237.8547 | 238.6702 |
| 247.7340  | 253.2756 | 255.2886 |
| 261.6864  | 271.4297 | 278.7976 |
| 280.2429  | 283.1869 | 285.2076 |
| 287.7713  | 297.9040 | 304.4497 |
| 309.7800  | 326.0462 | 328.2451 |
| 334.7257  | 340.9083 | 348.0995 |
| 357.5391  | 360.9473 | 362.7853 |
| 364.0279  | 381.0857 | 382.7889 |
| 393.5665  | 394.9124 | 397.4423 |

|           |           |           |
|-----------|-----------|-----------|
| 407.9645  | 414.3430  | 419.0781  |
| 421.4617  | 423.7197  | 430.9281  |
| 438.1331  | 442.6114  | 443.4333  |
| 446.1375  | 462.3289  | 469.4227  |
| 480.9008  | 482.6198  | 483.2939  |
| 517.8935  | 520.8896  | 528.6435  |
| 530.7586  | 535.0360  | 553.8384  |
| 554.0874  | 561.2158  | 562.6470  |
| 575.5245  | 591.3092  | 615.9251  |
| 626.8483  | 630.6521  | 631.8546  |
| 634.0911  | 638.3503  | 649.4824  |
| 665.6965  | 672.4841  | 682.2058  |
| 694.9471  | 700.8014  | 714.5522  |
| 718.3745  | 722.3734  | 727.6765  |
| 734.5574  | 742.0240  | 753.2617  |
| 756.0171  | 756.2873  | 763.0505  |
| 769.0012  | 775.0085  | 779.8426  |
| 784.4461  | 794.8425  | 800.3940  |
| 813.9607  | 818.8927  | 849.7335  |
| 851.3614  | 851.6213  | 857.3633  |
| 868.9367  | 876.0416  | 879.1540  |
| 884.5367  | 889.3464  | 891.4164  |
| 893.9534  | 912.2681  | 926.2279  |
| 934.2313  | 939.9749  | 941.0418  |
| 943.6666  | 946.2022  | 947.9973  |
| 949.7147  | 952.2125  | 964.1985  |
| 972.8685  | 975.8910  | 976.1868  |
| 983.1577  | 987.8381  | 991.8399  |
| 993.5803  | 997.1693  | 999.5189  |
| 1009.0771 | 1009.3075 | 1011.1921 |
| 1012.4912 | 1014.6807 | 1015.6694 |

|           |           |           |
|-----------|-----------|-----------|
| 1029.8813 | 1031.3459 | 1037.0176 |
| 1048.2620 | 1049.7957 | 1052.0361 |
| 1054.3920 | 1054.5410 | 1058.1884 |
| 1062.9027 | 1068.1196 | 1070.3629 |
| 1082.4566 | 1087.9065 | 1091.4113 |
| 1102.9136 | 1106.0190 | 1108.4186 |
| 1117.2158 | 1128.1093 | 1129.4112 |
| 1134.6157 | 1145.7805 | 1154.2701 |
| 1166.1530 | 1173.8396 | 1183.7133 |
| 1188.9663 | 1189.1561 | 1190.1458 |
| 1192.2057 | 1197.4791 | 1200.5381 |
| 1203.7331 | 1205.0236 | 1206.3973 |
| 1214.8129 | 1219.5207 | 1221.7664 |
| 1222.7572 | 1242.0866 | 1248.0936 |
| 1254.7949 | 1257.9163 | 1258.8916 |
| 1266.5335 | 1269.1316 | 1274.8957 |
| 1289.7450 | 1295.0536 | 1300.5712 |
| 1319.2965 | 1323.6642 | 1324.4817 |
| 1327.9342 | 1338.6701 | 1347.7025 |
| 1353.0688 | 1354.3116 | 1360.1681 |
| 1363.0017 | 1363.5837 | 1377.4106 |
| 1396.9354 | 1402.7521 | 1410.1516 |
| 1410.4560 | 1411.3472 | 1415.2640 |
| 1415.8863 | 1417.0616 | 1420.0763 |
| 1425.8346 | 1427.2621 | 1436.6441 |
| 1439.9924 | 1443.9553 | 1448.6369 |
| 1454.8382 | 1467.0308 | 1470.6078 |
| 1473.5232 | 1479.7221 | 1481.5949 |
| 1485.1631 | 1488.7725 | 1489.0589 |
| 1493.5475 | 1495.1181 | 1495.7442 |
| 1498.0602 | 1498.1855 | 1501.4449 |



|           |           |           |
|-----------|-----------|-----------|
| 1502.2094 | 1506.1041 | 1508.9965 |
| 1510.4062 | 1510.9980 | 1516.2592 |
| 1520.4689 | 1524.7722 | 1525.1521 |
| 1527.7829 | 1530.7181 | 1532.0661 |
| 1541.1547 | 1549.9591 | 1554.5275 |
| 1581.5122 | 1609.8610 | 1623.0827 |
| 1626.0683 | 1633.1102 | 1637.5777 |
| 1643.6713 | 1643.9166 | 1644.7059 |
| 1650.6801 | 1670.9999 | 1671.6407 |
| 1719.6277 | 1746.3929 | 2977.0402 |
| 3036.6526 | 3039.0659 | 3045.5502 |
| 3047.1622 | 3049.8553 | 3054.0957 |
| 3057.0744 | 3061.2944 | 3082.2577 |
| 3091.6233 | 3091.6964 | 3104.7439 |
| 3106.5016 | 3114.3071 | 3116.0577 |
| 3122.1957 | 3124.5727 | 3125.7985 |
| 3129.3788 | 3131.8655 | 3134.5943 |
| 3135.3285 | 3145.2873 | 3151.6644 |
| 3175.4851 | 3176.6194 | 3178.9867 |
| 3179.2380 | 3182.2481 | 3185.0726 |
| 3187.4720 | 3187.5019 | 3187.6273 |
| 3191.2450 | 3191.5925 | 3193.5763 |
| 3196.5610 | 3197.0862 | 3197.3535 |
| 3203.4497 | 3205.2517 | 3207.1876 |
| 3208.8303 | 3209.2556 | 3209.9043 |
| 3216.7128 | 3217.2707 | 3219.6512 |
| 3222.5037 | 3228.7372 | 3231.1080 |
| 3255.9374 | 3630.9300 | 3770.9063 |

### **TS5RR3**

Zero-point correction= 0.960683

Thermal correction to Energy= 1.018546

Thermal correction to Enthalpy= 1.019490

Thermal correction to Gibbs Free Energy= 0.865162

Sum of electronic and zero-point Energies= -2949.491853

Sum of electronic and thermal Energies= -2949.433991

Sum of electronic and thermal Enthalpies= -2949.433047

Sum of electronic and thermal Free Energies= -2949.587374

#### Cartesian coordinates

|   |          |           |           |
|---|----------|-----------|-----------|
| C | 2.560346 | -2.714967 | 3.197528  |
| C | 1.471007 | -2.263553 | 2.409561  |
| C | 1.811436 | -1.859411 | 1.056513  |
| C | 3.156572 | -1.933917 | 0.619261  |
| C | 4.150987 | -2.474163 | 1.437076  |
| N | 3.812606 | -2.828382 | 2.716541  |
| H | 2.386156 | -3.020057 | 4.220007  |
| C | 3.514738 | -1.482399 | -0.765858 |
| C | 3.164200 | -2.327240 | -1.870728 |
| C | 4.136572 | -0.256566 | -1.004619 |
| C | 2.553232 | -3.601524 | -1.688484 |
| C | 3.428485 | -1.887393 | -3.209548 |
| C | 4.419606 | 0.144960  | -2.340145 |
| C | 2.206206 | -4.380621 | -2.768831 |
| H | 2.363182 | -3.960638 | -0.683884 |
| C | 3.056645 | -2.715381 | -4.302742 |
| C | 4.067919 | -0.638567 | -3.409554 |
| H | 4.950533 | 1.074385  | -2.514507 |
| C | 2.453771 | -3.933615 | -4.089808 |
| H | 1.741476 | -5.348204 | -2.607611 |
| H | 3.258755 | -2.366687 | -5.311322 |
| H | 4.290808 | -0.314568 | -4.421673 |

|   |          |           |           |
|---|----------|-----------|-----------|
| H | 2.170989 | -4.557923 | -4.931481 |
| C | 0.751099 | -1.522636 | 0.147595  |
| H | 0.959745 | -1.228014 | -0.873629 |
| O | 0.287472 | -2.243458 | 2.880605  |
| C | 5.563643 | -2.703861 | 0.985640  |
| H | 5.652711 | -2.481895 | -0.075774 |
| H | 6.260702 | -2.050688 | 1.516551  |
| H | 5.868280 | -3.743316 | 1.139233  |
| C | 4.567051 | 0.648429  | 0.118777  |
| O | 5.021768 | 0.203208  | 1.186602  |
| N | 4.468013 | 1.976090  | -0.114525 |
| H | 3.993201 | 2.271003  | -0.952760 |
| C | 5.034253 | 3.015045  | 0.766940  |
| C | 4.247108 | 3.104112  | 2.098302  |
| H | 4.376703 | 4.091971  | 2.547597  |
| H | 3.172887 | 2.989129  | 1.882482  |
| O | 4.691689 | 2.163123  | 3.061066  |
| H | 4.811321 | 1.321976  | 2.575745  |
| C | 5.161311 | 4.362660  | -0.008779 |
| C | 3.780085 | 4.997352  | -0.268478 |
| H | 3.124699 | 4.347363  | -0.858047 |
| H | 3.260741 | 5.236168  | 0.664421  |
| H | 3.897562 | 5.928655  | -0.831086 |
| C | 5.886784 | 4.132230  | -1.352593 |
| H | 6.103703 | 5.094901  | -1.825652 |
| H | 6.834819 | 3.604880  | -1.203149 |
| H | 5.290439 | 3.556438  | -2.066790 |
| C | 6.022940 | 5.336593  | 0.821922  |
| H | 7.012529 | 4.912624  | 1.023147  |
| H | 6.162878 | 6.269877  | 0.267793  |
| H | 5.562156 | 5.592708  | 1.779344  |

|   |           |           |           |
|---|-----------|-----------|-----------|
| N | -0.505545 | -1.690581 | 0.495583  |
| C | -1.635100 | -1.543280 | -0.304887 |
| C | -2.765594 | -2.342211 | 0.223839  |
| O | -2.908057 | -2.596812 | 1.414087  |
| O | -3.575962 | -2.716494 | -0.770564 |
| C | -4.665276 | -3.704138 | -0.576424 |
| C | -5.688207 | -3.218471 | 0.449799  |
| H | -5.257032 | -3.188454 | 1.450176  |
| H | -6.034869 | -2.220937 | 0.171067  |
| H | -6.537618 | -3.909786 | 0.451712  |
| C | -5.291116 | -3.768654 | -1.968993 |
| H | -4.547210 | -4.065343 | -2.714083 |
| H | -6.104808 | -4.499323 | -1.978140 |
| H | -5.693999 | -2.789771 | -2.241712 |
| C | -4.029632 | -5.039273 | -0.184134 |
| H | -4.802335 | -5.812471 | -0.139592 |
| H | -3.282040 | -5.339262 | -0.924663 |
| H | -3.552055 | -4.966771 | 0.794631  |
| P | -4.857492 | 0.814537  | -0.310132 |
| O | -5.996279 | -0.123307 | -0.657659 |
| C | -5.263123 | 2.510129  | -0.879619 |
| C | -6.604829 | 2.917822  | -0.909441 |
| C | -4.263046 | 3.420518  | -1.250311 |
| C | -6.941203 | 4.215815  | -1.296751 |
| H | -7.381543 | 2.208711  | -0.639090 |
| C | -4.598631 | 4.720412  | -1.634873 |
| H | -3.225477 | 3.099923  | -1.248368 |
| C | -5.937491 | 5.119706  | -1.657138 |
| H | -7.983147 | 4.522030  | -1.320470 |
| H | -3.817702 | 5.418975  | -1.921617 |
| H | -6.198673 | 6.130085  | -1.958423 |

|   |           |           |           |
|---|-----------|-----------|-----------|
| C | -4.697261 | 0.988808  | 1.512663  |
| C | -5.272315 | 0.021849  | 2.347682  |
| C | -3.956898 | 2.033510  | 2.090276  |
| C | -5.111793 | 0.095085  | 3.732925  |
| H | -5.846448 | -0.783823 | 1.905550  |
| C | -3.794103 | 2.106511  | 3.474124  |
| H | -3.510290 | 2.795460  | 1.457290  |
| C | -4.371279 | 1.135740  | 4.298012  |
| H | -5.564376 | -0.659285 | 4.370148  |
| H | -3.219480 | 2.919018  | 3.909239  |
| H | -4.245311 | 1.192482  | 5.375286  |
| N | -3.383059 | 0.522969  | -0.970822 |
| C | -2.240764 | 0.367727  | -0.275321 |
| C | -1.000898 | 0.959518  | -0.862281 |
| C | -0.805573 | 1.009605  | -2.252155 |
| C | -0.013943 | 1.480137  | -0.017537 |
| C | 0.354707  | 1.565797  | -2.781725 |
| H | -1.579467 | 0.613184  | -2.901341 |
| C | 1.138376  | 2.063891  | -0.549843 |
| H | -0.155220 | 1.444415  | 1.058867  |
| C | 1.328309  | 2.103774  | -1.930118 |
| H | 0.501176  | 1.592848  | -3.857298 |
| H | 1.879845  | 2.477154  | 0.122756  |
| H | 2.218754  | 2.555045  | -2.358810 |
| H | -1.448773 | -1.647008 | -1.368638 |
| C | 4.852588  | -3.361885 | 3.623166  |
| H | 5.216749  | -4.317482 | 3.243975  |
| H | 5.678800  | -2.654425 | 3.690414  |
| H | 4.417960  | -3.505724 | 4.609074  |
| H | -2.258199 | 0.446479  | 0.818848  |
| H | -0.619245 | -1.952755 | 1.507721  |

|   |          |          |          |
|---|----------|----------|----------|
| H | 6.046886 | 2.683840 | 1.028664 |
|---|----------|----------|----------|

Vibrational frequencies

|           |          |          |
|-----------|----------|----------|
| -376.9881 | 7.5839   | 17.5322  |
| 19.1034   | 25.3399  | 27.5794  |
| 29.7617   | 35.8554  | 37.2684  |
| 41.4138   | 42.8806  | 43.6880  |
| 48.9685   | 53.0477  | 57.5160  |
| 60.7616   | 64.0414  | 70.3561  |
| 71.9599   | 75.9940  | 79.7741  |
| 82.2650   | 91.2480  | 95.3461  |
| 102.5670  | 110.7626 | 122.1475 |
| 128.6808  | 135.1665 | 140.9870 |
| 145.8104  | 149.2056 | 153.4548 |
| 157.6681  | 169.4950 | 174.5436 |
| 185.0185  | 195.8975 | 202.6937 |
| 210.1777  | 218.0062 | 222.8234 |
| 237.9896  | 239.5857 | 242.2497 |
| 243.5224  | 246.6794 | 251.1373 |
| 260.1174  | 270.2885 | 271.5385 |
| 287.9733  | 289.8046 | 297.8540 |
| 299.3416  | 305.1855 | 309.3086 |
| 311.3968  | 329.9436 | 334.6788 |
| 341.3939  | 347.8910 | 353.4417 |
| 359.9817  | 369.3489 | 376.9492 |
| 381.6716  | 382.6882 | 388.1592 |
| 397.4594  | 406.5945 | 409.6478 |
| 412.9918  | 413.2240 | 417.4805 |
| 420.1037  | 427.1171 | 434.2177 |
| 441.0260  | 444.8866 | 452.2923 |
| 462.7791  | 475.1240 | 479.9484 |

|           |           |           |
|-----------|-----------|-----------|
| 484.2884  | 484.6406  | 485.5401  |
| 510.6687  | 522.0862  | 532.2895  |
| 535.2978  | 538.7486  | 541.3149  |
| 548.5365  | 558.2975  | 561.1806  |
| 578.1149  | 581.3035  | 596.8446  |
| 613.6925  | 626.9468  | 628.4709  |
| 630.6641  | 632.0934  | 636.0141  |
| 643.0810  | 664.6587  | 674.9848  |
| 690.6829  | 700.7297  | 712.1092  |
| 712.8600  | 716.6096  | 725.4042  |
| 743.8750  | 747.2444  | 751.7951  |
| 755.3606  | 761.4870  | 764.9785  |
| 768.0477  | 770.4250  | 779.5007  |
| 780.0667  | 794.3616  | 799.3346  |
| 812.3219  | 817.5543  | 844.2590  |
| 852.0996  | 856.6421  | 861.8016  |
| 862.5861  | 871.2198  | 873.8126  |
| 874.9775  | 889.7849  | 890.0826  |
| 905.2986  | 911.6478  | 916.2308  |
| 924.3517  | 938.7707  | 939.3801  |
| 941.4744  | 942.5917  | 945.7700  |
| 947.5388  | 947.7758  | 974.1627  |
| 976.0566  | 978.2906  | 980.6987  |
| 987.4229  | 991.4655  | 991.7522  |
| 992.3357  | 999.8782  | 1003.5340 |
| 1008.4560 | 1009.5961 | 1011.0425 |
| 1012.5571 | 1014.1660 | 1014.9151 |
| 1028.5423 | 1031.9958 | 1036.3974 |
| 1049.3723 | 1050.2624 | 1054.2617 |
| 1055.7447 | 1059.0051 | 1060.9365 |
| 1067.4667 | 1077.7362 | 1082.8036 |

|           |           |           |
|-----------|-----------|-----------|
| 1085.7493 | 1098.0501 | 1099.6452 |
| 1101.1822 | 1103.1642 | 1109.9630 |
| 1113.5853 | 1119.8545 | 1122.1345 |
| 1127.9458 | 1132.4716 | 1144.6632 |
| 1153.2293 | 1169.4815 | 1183.6382 |
| 1184.6039 | 1189.4740 | 1190.1904 |
| 1191.1168 | 1200.2461 | 1202.9198 |
| 1206.2440 | 1207.8730 | 1211.3828 |
| 1215.9795 | 1219.3838 | 1221.0088 |
| 1235.5417 | 1248.8791 | 1251.7306 |
| 1254.3399 | 1261.9455 | 1262.9726 |
| 1265.0361 | 1280.6829 | 1281.3719 |
| 1284.9553 | 1293.8445 | 1306.8787 |
| 1320.0912 | 1325.4600 | 1325.5130 |
| 1328.0673 | 1334.9132 | 1344.4287 |
| 1353.3257 | 1356.6308 | 1357.2232 |
| 1360.4396 | 1367.8812 | 1386.0412 |
| 1399.6745 | 1408.9460 | 1409.0798 |
| 1409.6507 | 1411.7532 | 1415.2368 |
| 1417.3023 | 1421.7684 | 1427.4033 |
| 1429.4831 | 1436.1855 | 1438.2552 |
| 1451.3798 | 1455.2978 | 1461.6120 |
| 1465.5763 | 1473.1712 | 1475.1140 |
| 1480.1550 | 1481.6342 | 1481.9091 |
| 1487.7171 | 1490.9888 | 1493.4827 |
| 1495.6452 | 1498.5329 | 1499.3082 |
| 1499.8783 | 1501.5126 | 1504.9979 |
| 1506.9937 | 1512.6907 | 1513.6407 |
| 1516.0517 | 1516.7008 | 1519.5874 |
| 1521.1437 | 1523.4317 | 1523.6877 |
| 1531.5596 | 1535.1391 | 1548.1780 |



|           |           |           |
|-----------|-----------|-----------|
| 1549.0061 | 1552.8336 | 1552.8895 |
| 1578.4259 | 1607.4684 | 1622.4456 |
| 1625.1274 | 1626.2720 | 1637.3619 |
| 1643.1870 | 1643.9397 | 1645.4585 |
| 1655.3528 | 1669.0628 | 1670.9591 |
| 1691.7549 | 1741.0615 | 2946.5620 |
| 2985.4341 | 3033.1062 | 3042.4810 |
| 3044.2383 | 3048.5110 | 3048.9927 |
| 3050.4682 | 3052.4360 | 3056.6175 |
| 3063.6024 | 3090.6545 | 3100.0068 |
| 3112.5056 | 3113.2082 | 3117.8043 |
| 3118.7650 | 3122.2605 | 3124.3671 |
| 3128.3065 | 3129.4098 | 3130.7297 |
| 3132.5614 | 3141.2576 | 3150.5274 |
| 3170.3984 | 3174.7534 | 3177.0860 |
| 3178.0982 | 3179.7272 | 3180.5767 |
| 3183.9231 | 3185.5757 | 3187.7943 |
| 3187.8011 | 3193.0270 | 3193.4620 |
| 3193.6574 | 3194.6874 | 3196.2637 |
| 3197.3497 | 3200.2878 | 3202.1633 |
| 3205.3977 | 3207.1754 | 3210.5057 |
| 3210.9475 | 3213.1558 | 3223.2468 |
| 3229.5611 | 3229.6668 | 3233.7752 |
| 3255.6717 | 3564.1701 | 3666.1941 |

### **TS5RS**

Zero-point correction= 0.961281

Thermal correction to Energy= 1.018979

Thermal correction to Enthalpy= 1.019924

Thermal correction to Gibbs Free Energy= 0.868020

Sum of electronic and zero-point Energies= -2949.520532

Sum of electronic and thermal Energies= -2949.462834

Sum of electronic and thermal Enthalpies= -2949.461890

Sum of electronic and thermal Free Energies= -2949.613794

Cartesian coordinates

|   |          |           |           |
|---|----------|-----------|-----------|
| C | 2.417517 | -0.809717 | 4.082289  |
| C | 1.344061 | -0.269765 | 3.314238  |
| C | 1.602960 | -0.189802 | 1.890251  |
| C | 2.818490 | -0.669245 | 1.355864  |
| C | 3.817288 | -1.182185 | 2.185617  |
| N | 3.568396 | -1.233398 | 3.535461  |
| H | 2.310549 | -0.896541 | 5.154749  |
| C | 3.035715 | -0.688510 | -0.128720 |
| C | 2.897134 | -1.927499 | -0.834019 |
| C | 3.323667 | 0.472012  | -0.835437 |
| C | 2.535141 | -3.139817 | -0.183468 |
| C | 3.120667 | -1.952828 | -2.251491 |
| C | 3.525720 | 0.439228  | -2.240001 |
| C | 2.425687 | -4.314344 | -0.891256 |
| H | 2.318093 | -3.127740 | 0.878241  |
| C | 3.004749 | -3.184570 | -2.949911 |
| C | 3.444268 | -0.746909 | -2.926710 |
| H | 3.763161 | 1.361539  | -2.759855 |
| C | 2.668416 | -4.341098 | -2.285019 |
| H | 2.120891 | -5.222779 | -0.384326 |
| H | 3.177863 | -3.192602 | -4.022270 |
| H | 3.617605 | -0.773047 | -3.998432 |
| H | 2.566952 | -5.274522 | -2.828463 |
| C | 0.631122 | 0.420673  | 1.034207  |
| H | 0.871089 | 0.614463  | 0.002857  |
| O | 0.272135 | 0.110794  | 3.870807  |

|   |           |           |           |
|---|-----------|-----------|-----------|
| C | 5.147207  | -1.665956 | 1.681520  |
| H | 5.251240  | -1.424329 | 0.625626  |
| H | 5.977380  | -1.190995 | 2.211842  |
| H | 5.255371  | -2.750873 | 1.789843  |
| C | 3.374982  | 1.786025  | -0.111767 |
| O | 4.097565  | 1.957565  | 0.883457  |
| N | 2.545366  | 2.728027  | -0.610818 |
| H | 1.924663  | 2.446324  | -1.358965 |
| C | 2.420691  | 4.100718  | -0.083512 |
| C | 1.799840  | 4.082180  | 1.335241  |
| H | 1.342370  | 5.049442  | 1.558143  |
| H | 0.994593  | 3.331427  | 1.357310  |
| O | 2.761342  | 3.850123  | 2.352767  |
| H | 3.334463  | 3.127673  | 2.027035  |
| C | 1.668216  | 4.999030  | -1.112986 |
| C | 0.177752  | 4.616268  | -1.202572 |
| H | 0.034766  | 3.580758  | -1.524219 |
| H | -0.336303 | 4.753109  | -0.245952 |
| H | -0.327059 | 5.244788  | -1.942393 |
| C | 2.319035  | 4.862248  | -2.506436 |
| H | 1.874197  | 5.588418  | -3.194045 |
| H | 3.396137  | 5.054718  | -2.458092 |
| H | 2.168594  | 3.873464  | -2.948271 |
| C | 1.796285  | 6.473341  | -0.678564 |
| H | 2.847389  | 6.771659  | -0.601412 |
| H | 1.316860  | 7.119101  | -1.420880 |
| H | 1.316028  | 6.670458  | 0.283376  |
| N | -0.496405 | 0.921216  | 1.488650  |
| C | -1.444041 | 1.482226  | 0.632152  |
| C | -2.747113 | 1.698906  | 1.283717  |
| O | -3.059817 | 1.212517  | 2.363682  |

|   |           |           |           |
|---|-----------|-----------|-----------|
| O | -3.542454 | 2.430802  | 0.482775  |
| C | -4.967432 | 2.669399  | 0.794017  |
| C | -5.083318 | 3.477789  | 2.087989  |
| H | -4.734556 | 2.898570  | 2.942888  |
| H | -4.492145 | 4.395625  | 2.014509  |
| H | -6.129346 | 3.754689  | 2.250175  |
| C | -5.435784 | 3.490446  | -0.407160 |
| H | -5.333300 | 2.914475  | -1.331510 |
| H | -6.487725 | 3.762440  | -0.284073 |
| H | -4.846130 | 4.406897  | -0.499312 |
| C | -5.703806 | 1.332056  | 0.865425  |
| H | -6.778064 | 1.512338  | 0.970109  |
| H | -5.539761 | 0.756752  | -0.050178 |
| H | -5.362021 | 0.734723  | 1.709237  |
| P | -1.444609 | -2.229468 | 0.383619  |
| O | -0.844775 | -2.382227 | 1.764699  |
| C | -1.073724 | -3.690961 | -0.650234 |
| C | -0.947010 | -4.941747 | -0.028756 |
| C | -0.957261 | -3.602500 | -2.043705 |
| C | -0.712500 | -6.087727 | -0.789252 |
| H | -1.017622 | -5.007066 | 1.052871  |
| C | -0.725185 | -4.749239 | -2.805097 |
| H | -1.028659 | -2.630097 | -2.520809 |
| C | -0.603937 | -5.992473 | -2.179799 |
| H | -0.610436 | -7.052244 | -0.300158 |
| H | -0.627709 | -4.671735 | -3.884036 |
| H | -0.419357 | -6.883626 | -2.772718 |
| C | -3.278906 | -2.224534 | 0.498140  |
| C | -3.878497 | -2.116096 | 1.759266  |
| C | -4.093003 | -2.317466 | -0.641940 |
| C | -5.269323 | -2.115603 | 1.882667  |

|   |           |           |           |
|---|-----------|-----------|-----------|
| H | -3.243739 | -2.037991 | 2.635682  |
| C | -5.482919 | -2.310282 | -0.519820 |
| H | -3.639652 | -2.407833 | -1.625454 |
| C | -6.072511 | -2.213700 | 0.744359  |
| H | -5.725857 | -2.036253 | 2.865028  |
| H | -6.105211 | -2.384488 | -1.406863 |
| H | -7.154315 | -2.211523 | 0.840011  |
| N | -0.946722 | -0.963128 | -0.554084 |
| C | -1.691264 | 0.134070  | -0.815701 |
| C | -1.264408 | 0.934515  | -2.014400 |
| C | -0.007488 | 0.729621  | -2.603393 |
| C | -2.106930 | 1.922025  | -2.544876 |
| C | 0.402953  | 1.507274  | -3.688866 |
| H | 0.629798  | -0.057566 | -2.216343 |
| C | -1.702850 | 2.688772  | -3.638466 |
| H | -3.071702 | 2.099149  | -2.079253 |
| C | -0.443487 | 2.489674  | -4.211221 |
| H | 1.379611  | 1.333975  | -4.131085 |
| H | -2.367594 | 3.449048  | -4.038046 |
| H | -0.124867 | 3.092897  | -5.055794 |
| H | -1.081946 | 2.307812  | 0.031307  |
| C | 4.605032  | -1.774670 | 4.442390  |
| H | 4.883606  | -2.778696 | 4.123100  |
| H | 5.481923  | -1.126674 | 4.424570  |
| H | 4.203352  | -1.813597 | 5.451726  |
| H | -2.780088 | 0.078983  | -0.712817 |
| H | -0.721988 | 0.676353  | 2.468407  |
| H | 3.439957  | 4.491630  | 0.024396  |

Vibrational frequencies

-357.8197                      14.5870                      16.2592

|          |          |          |
|----------|----------|----------|
| 22.9753  | 25.8304  | 32.6734  |
| 34.2250  | 37.6172  | 42.5142  |
| 47.5791  | 49.1085  | 52.9526  |
| 54.6664  | 58.7599  | 61.9372  |
| 65.4759  | 68.6937  | 71.4347  |
| 75.3006  | 79.1158  | 82.9617  |
| 89.6275  | 95.1919  | 98.6513  |
| 103.3569 | 105.0223 | 110.6434 |
| 123.2691 | 130.0602 | 132.8531 |
| 140.9775 | 149.4246 | 156.7042 |
| 164.1234 | 169.7730 | 177.0413 |
| 186.5848 | 194.9768 | 197.9914 |
| 208.3435 | 220.2210 | 224.1312 |
| 232.2506 | 235.9996 | 243.0138 |
| 244.0196 | 245.0311 | 257.8130 |
| 263.4605 | 263.7415 | 271.1206 |
| 280.8141 | 283.5035 | 293.0593 |
| 298.7442 | 301.0659 | 304.0148 |
| 316.8079 | 325.5490 | 331.9970 |
| 342.9038 | 343.2419 | 355.7667 |
| 364.8668 | 372.7618 | 375.7633 |
| 378.0820 | 385.8079 | 398.0950 |
| 399.5809 | 407.5354 | 408.0428 |
| 410.0459 | 416.4437 | 422.4714 |
| 423.6140 | 437.8722 | 440.4023 |
| 445.5101 | 449.0750 | 457.6931 |
| 462.2771 | 471.1160 | 475.7105 |
| 480.6117 | 486.1460 | 497.4691 |
| 520.2044 | 524.0673 | 533.3881 |
| 536.4144 | 541.3766 | 552.3311 |
| 555.2496 | 573.2683 | 577.6168 |

|           |           |           |
|-----------|-----------|-----------|
| 584.3965  | 589.9212  | 601.1252  |
| 608.4931  | 614.3496  | 625.7125  |
| 630.1353  | 631.5884  | 633.9367  |
| 647.6775  | 665.1793  | 671.7192  |
| 696.0438  | 702.8140  | 709.2294  |
| 710.9682  | 717.8103  | 727.0390  |
| 740.2080  | 750.9862  | 754.2279  |
| 756.9196  | 761.6376  | 763.0913  |
| 763.9606  | 767.8602  | 776.8222  |
| 783.5808  | 795.6410  | 798.0459  |
| 812.1405  | 822.6071  | 843.8366  |
| 850.3066  | 851.7820  | 857.4832  |
| 864.1190  | 869.5676  | 870.3488  |
| 875.9833  | 886.8935  | 887.4081  |
| 890.9878  | 904.1510  | 910.7801  |
| 930.2397  | 935.6530  | 936.7524  |
| 939.4792  | 940.7447  | 943.7102  |
| 946.5748  | 951.4047  | 953.4324  |
| 970.1458  | 979.6063  | 979.9794  |
| 985.0851  | 986.3178  | 986.9032  |
| 987.7232  | 987.9774  | 991.6492  |
| 1002.2627 | 1006.9377 | 1007.1991 |
| 1010.5492 | 1012.6105 | 1013.5112 |
| 1017.6376 | 1027.9479 | 1032.0515 |
| 1036.6726 | 1049.5603 | 1050.2546 |
| 1052.6914 | 1055.9798 | 1056.2606 |
| 1062.9716 | 1063.3520 | 1070.4085 |
| 1080.1691 | 1086.6361 | 1100.1429 |
| 1101.1010 | 1102.6349 | 1104.8618 |
| 1112.5461 | 1116.9483 | 1120.5468 |
| 1129.9803 | 1133.0909 | 1145.5205 |

|           |           |           |
|-----------|-----------|-----------|
| 1154.0297 | 1175.6980 | 1182.1729 |
| 1184.3995 | 1186.9687 | 1190.2527 |
| 1191.2167 | 1192.1192 | 1201.6594 |
| 1203.0240 | 1204.1901 | 1209.6321 |
| 1211.9281 | 1219.8848 | 1221.0192 |
| 1233.4151 | 1247.6500 | 1249.2170 |
| 1256.1326 | 1261.3281 | 1262.9204 |
| 1264.7301 | 1277.1078 | 1282.3709 |
| 1290.4059 | 1292.6921 | 1313.1252 |
| 1314.1123 | 1325.4070 | 1325.6583 |
| 1327.7043 | 1329.8035 | 1343.4437 |
| 1353.2825 | 1357.8182 | 1359.0932 |
| 1360.9984 | 1363.5561 | 1388.3060 |
| 1404.6396 | 1409.1560 | 1409.6057 |
| 1413.3816 | 1414.6805 | 1415.3160 |
| 1423.2446 | 1427.3877 | 1429.9648 |
| 1430.9077 | 1436.9460 | 1439.2884 |
| 1441.8179 | 1454.0044 | 1456.4244 |
| 1467.2097 | 1473.9735 | 1476.0117 |
| 1478.5113 | 1480.3998 | 1483.5220 |
| 1489.2414 | 1492.2348 | 1495.0866 |
| 1496.0447 | 1496.9957 | 1498.5699 |
| 1499.5138 | 1501.2593 | 1502.3905 |
| 1502.7841 | 1507.3153 | 1511.0517 |
| 1513.7608 | 1518.2898 | 1520.7182 |
| 1521.1458 | 1522.1176 | 1525.3725 |
| 1530.7922 | 1532.5902 | 1533.2331 |
| 1548.9273 | 1555.5282 | 1558.2212 |
| 1583.9416 | 1613.5974 | 1625.0037 |
| 1626.3448 | 1632.2680 | 1643.1142 |
| 1643.5765 | 1644.4172 | 1646.5510 |



|           |           |           |
|-----------|-----------|-----------|
| 1651.4969 | 1663.3282 | 1672.7406 |
| 1701.2606 | 1741.2765 | 2997.2973 |
| 3041.9276 | 3045.0171 | 3050.3223 |
| 3050.4267 | 3051.0381 | 3053.6962 |
| 3054.5981 | 3055.0985 | 3061.6305 |
| 3093.1391 | 3101.6212 | 3111.7580 |
| 3112.1354 | 3115.3604 | 3118.4542 |
| 3123.1258 | 3123.6132 | 3126.2937 |
| 3127.9668 | 3130.1876 | 3131.0875 |
| 3136.4713 | 3167.0389 | 3176.6663 |
| 3177.5265 | 3177.6095 | 3178.3176 |
| 3178.7184 | 3181.8651 | 3183.1329 |
| 3185.3271 | 3186.4645 | 3190.0158 |
| 3190.7762 | 3192.6366 | 3194.1306 |
| 3199.8838 | 3201.2209 | 3203.8292 |
| 3204.7244 | 3206.3209 | 3206.8703 |
| 3208.0118 | 3208.7971 | 3210.7290 |
| 3211.1400 | 3215.0432 | 3217.4843 |
| 3227.8831 | 3234.7281 | 3254.1440 |
| 3304.9355 | 3569.0795 | 3595.0333 |

### **TS5RS1**

Zero-point correction= 0.961633

Thermal correction to Energy= 1.019194

Thermal correction to Enthalpy= 1.020138

Thermal correction to Gibbs Free Energy= 0.867559

Sum of electronic and zero-point Energies= -2949.522846

Sum of electronic and thermal Energies= -2949.465285

Sum of electronic and thermal Enthalpies= -2949.464340

Sum of electronic and thermal Free Energies= -2949.616920

Cartesian coordinates

|   |          |           |           |
|---|----------|-----------|-----------|
| C | 3.503889 | -3.923723 | -1.368902 |
| C | 2.246275 | -3.259398 | -1.363525 |
| C | 2.253038 | -1.940729 | -0.757982 |
| C | 3.445015 | -1.419087 | -0.197933 |
| C | 4.624486 | -2.169238 | -0.200614 |
| N | 4.609144 | -3.398258 | -0.814322 |
| H | 3.586577 | -4.901834 | -1.822253 |
| C | 3.458226 | -0.053426 | 0.421395  |
| C | 4.173066 | 1.011182  | -0.222994 |
| C | 2.770264 | 0.202468  | 1.601315  |
| C | 4.844940 | 0.843403  | -1.466704 |
| C | 4.224493 | 2.299236  | 0.407227  |
| C | 2.777252 | 1.497237  | 2.179739  |
| C | 5.565717 | 1.874157  | -2.028467 |
| H | 4.786356 | -0.111176 | -1.977228 |
| C | 4.979395 | 3.340108  | -0.197533 |
| C | 3.504613 | 2.512670  | 1.611400  |
| H | 2.214191 | 1.664624  | 3.091451  |
| C | 5.646262 | 3.132396  | -1.383359 |
| H | 6.073787 | 1.722448  | -2.975667 |
| H | 5.013481 | 4.308588  | 0.293083  |
| H | 3.530472 | 3.495383  | 2.072839  |
| H | 6.220395 | 3.934695  | -1.835921 |
| C | 1.019697 | -1.229469 | -0.631978 |
| H | 0.976659 | -0.237089 | -0.199179 |
| O | 1.216825 | -3.805055 | -1.868198 |
| C | 5.898903 | -1.716352 | 0.455157  |
| H | 5.704312 | -0.844915 | 1.076755  |
| H | 6.318884 | -2.493778 | 1.098630  |
| H | 6.661870 | -1.438403 | -0.280435 |

|   |           |           |           |
|---|-----------|-----------|-----------|
| C | 2.038514  | -0.901762 | 2.318249  |
| O | 2.639314  | -1.927720 | 2.687508  |
| N | 0.726357  | -0.680414 | 2.527848  |
| H | 0.293049  | 0.113008  | 2.043958  |
| C | -0.094196 | -1.595884 | 3.332363  |
| C | -0.564563 | -2.808273 | 2.501233  |
| H | -0.999808 | -3.545727 | 3.190342  |
| H | -1.352718 | -2.509965 | 1.804476  |
| O | 0.472543  | -3.399100 | 1.728534  |
| H | 1.320723  | -3.197996 | 2.164647  |
| C | -1.241311 | -0.829690 | 4.062731  |
| C | -2.250799 | -0.197514 | 3.081781  |
| H | -1.780256 | 0.549499  | 2.439327  |
| H | -2.731874 | -0.940986 | 2.439848  |
| H | -3.041171 | 0.307794  | 3.647241  |
| C | -0.617854 | 0.288024  | 4.923329  |
| H | -1.397090 | 0.802100  | 5.495633  |
| H | 0.112105  | -0.117820 | 5.632630  |
| H | -0.111209 | 1.035098  | 4.305754  |
| C | -1.988491 | -1.808768 | 4.991621  |
| H | -1.296908 | -2.339424 | 5.655737  |
| H | -2.697792 | -1.256909 | 5.617044  |
| H | -2.560321 | -2.552375 | 4.428740  |
| N | -0.132033 | -1.791821 | -0.915933 |
| C | -1.369711 | -1.229933 | -0.605980 |
| C | -2.466557 | -2.202124 | -0.695870 |
| O | -2.400242 | -3.257090 | -1.316549 |
| O | -3.537463 | -1.743382 | -0.023872 |
| C | -4.763380 | -2.549326 | 0.145218  |
| C | -4.421229 | -3.812576 | 0.938675  |
| H | -3.760374 | -4.464651 | 0.366388  |

|   |           |           |           |
|---|-----------|-----------|-----------|
| H | -3.929816 | -3.546931 | 1.879867  |
| H | -5.340260 | -4.358139 | 1.172257  |
| C | -5.659767 | -1.614648 | 0.957196  |
| H | -5.839964 | -0.687291 | 0.405986  |
| H | -6.621005 | -2.097346 | 1.154394  |
| H | -5.191180 | -1.365136 | 1.913393  |
| C | -5.393081 | -2.863264 | -1.213167 |
| H | -6.356427 | -3.357984 | -1.055582 |
| H | -5.561594 | -1.941273 | -1.774054 |
| H | -4.750387 | -3.516507 | -1.802586 |
| P | -1.149554 | 2.173387  | -0.087025 |
| O | -0.215584 | 1.362962  | 0.815106  |
| C | -2.184170 | 3.273211  | 0.919277  |
| C | -1.717025 | 3.636660  | 2.191007  |
| C | -3.419125 | 3.761647  | 0.468712  |
| C | -2.473601 | 4.483914  | 3.001074  |
| H | -0.771123 | 3.236220  | 2.542480  |
| C | -4.171696 | 4.612965  | 1.279305  |
| H | -3.791494 | 3.459130  | -0.504536 |
| C | -3.699557 | 4.975346  | 2.543993  |
| H | -2.111041 | 4.756526  | 3.987751  |
| H | -5.128638 | 4.987526  | 0.928148  |
| H | -4.288995 | 5.634530  | 3.174492  |
| C | -0.111531 | 3.225860  | -1.162990 |
| C | 1.227747  | 2.865056  | -1.362561 |
| C | -0.643777 | 4.316644  | -1.868329 |
| C | 2.023286  | 3.573912  | -2.265509 |
| H | 1.644004  | 2.039514  | -0.798033 |
| C | 0.155259  | 5.033990  | -2.757781 |
| H | -1.678620 | 4.610152  | -1.715310 |
| C | 1.487974  | 4.659076  | -2.961799 |

|   |           |           |           |
|---|-----------|-----------|-----------|
| H | 3.057505  | 3.282174  | -2.412978 |
| H | -0.259222 | 5.882974  | -3.293566 |
| H | 2.106790  | 5.216001  | -3.659410 |
| N | -2.212529 | 1.359444  | -1.043287 |
| C | -1.731889 | 0.351576  | -1.808145 |
| C | -2.620559 | -0.193888 | -2.875071 |
| C | -3.972076 | 0.167303  | -2.946302 |
| C | -2.104663 | -1.093019 | -3.820844 |
| C | -4.789852 | -0.352782 | -3.949963 |
| H | -4.361683 | 0.860929  | -2.209645 |
| C | -2.921842 | -1.616627 | -4.820920 |
| H | -1.059743 | -1.387837 | -3.762795 |
| C | -4.268877 | -1.247039 | -4.889164 |
| H | -5.835293 | -0.061578 | -3.998747 |
| H | -2.510082 | -2.311374 | -5.547047 |
| H | -4.906370 | -1.652477 | -5.669319 |
| H | -1.346832 | -0.619382 | 0.284170  |
| C | 5.851194  | -4.201357 | -0.866923 |
| H | 6.657457  | -3.604004 | -1.291462 |
| H | 6.122615  | -4.525590 | 0.138389  |
| H | 5.678127  | -5.072530 | -1.493629 |
| H | -0.673695 | 0.361043  | -2.116148 |
| H | -0.062040 | -2.733204 | -1.355050 |
| H | 0.579285  | -1.985572 | 4.105609  |

Vibrational frequencies

|           |         |         |
|-----------|---------|---------|
| -383.6295 | 8.2794  | 18.7619 |
| 22.7209   | 27.2657 | 29.0132 |
| 29.5785   | 34.1907 | 38.8416 |
| 40.4705   | 43.5463 | 48.0275 |
| 50.5040   | 50.5732 | 55.7613 |

|          |          |          |
|----------|----------|----------|
| 60.1178  | 63.8069  | 72.6944  |
| 77.9585  | 81.4828  | 86.1618  |
| 92.4530  | 97.6374  | 104.0430 |
| 112.1742 | 126.8052 | 131.6933 |
| 136.4299 | 139.4092 | 144.9019 |
| 149.2099 | 152.2261 | 157.5712 |
| 162.5649 | 174.5519 | 184.7289 |
| 188.8394 | 191.7840 | 199.2286 |
| 209.2243 | 218.1191 | 219.2063 |
| 221.1608 | 236.9175 | 242.3323 |
| 246.6741 | 249.3051 | 253.7986 |
| 256.1438 | 265.2164 | 273.8441 |
| 278.5606 | 280.4483 | 286.2766 |
| 289.5048 | 298.0076 | 308.0655 |
| 312.7759 | 317.5093 | 332.6861 |
| 343.9376 | 353.9702 | 357.4190 |
| 358.8027 | 364.4403 | 374.6370 |
| 383.7546 | 390.1863 | 403.3360 |
| 408.1536 | 409.3952 | 411.5562 |
| 412.6934 | 413.7733 | 416.7623 |
| 423.9263 | 429.2834 | 438.6627 |
| 440.3198 | 446.1344 | 451.9895 |
| 458.1853 | 466.1482 | 473.3072 |
| 479.1941 | 483.9186 | 510.7651 |
| 525.3689 | 530.5830 | 533.2731 |
| 537.6812 | 541.5673 | 547.1160 |
| 551.1686 | 553.7701 | 561.1365 |
| 576.3041 | 582.1602 | 601.7634 |
| 609.4924 | 630.2027 | 631.8555 |
| 632.3067 | 635.3864 | 649.4188 |
| 662.1245 | 673.5206 | 700.0883 |

|           |           |           |
|-----------|-----------|-----------|
| 704.9208  | 709.2138  | 711.0149  |
| 715.0713  | 736.1876  | 742.9629  |
| 744.8558  | 750.8828  | 759.3471  |
| 760.8848  | 764.4681  | 769.4309  |
| 770.5975  | 774.4144  | 777.2428  |
| 793.4024  | 797.1782  | 805.3639  |
| 817.6157  | 827.8733  | 847.9520  |
| 849.0638  | 849.8870  | 864.8347  |
| 866.2901  | 872.8185  | 873.8532  |
| 886.1389  | 890.9369  | 894.3664  |
| 906.2028  | 917.3766  | 933.4401  |
| 933.6758  | 937.4637  | 939.2550  |
| 943.8410  | 947.1814  | 949.4673  |
| 950.2701  | 958.2427  | 963.8997  |
| 971.4495  | 976.7483  | 981.1098  |
| 982.9776  | 983.2915  | 987.7685  |
| 990.0273  | 992.5970  | 1003.4539 |
| 1004.2159 | 1011.0334 | 1012.3708 |
| 1013.5506 | 1014.3712 | 1015.4243 |
| 1020.1364 | 1029.2920 | 1046.2341 |
| 1049.7346 | 1050.5622 | 1052.0486 |
| 1052.2706 | 1057.1726 | 1061.1089 |
| 1062.9650 | 1070.7145 | 1079.2972 |
| 1083.7503 | 1089.4769 | 1096.3328 |
| 1105.5974 | 1107.4029 | 1111.1434 |
| 1116.7282 | 1128.9821 | 1133.0179 |
| 1136.1088 | 1141.4284 | 1143.5353 |
| 1147.5668 | 1154.7243 | 1182.5038 |
| 1188.0999 | 1189.6516 | 1191.3849 |
| 1193.2159 | 1194.5413 | 1199.6500 |
| 1201.4574 | 1205.7361 | 1208.5017 |

|           |           |           |
|-----------|-----------|-----------|
| 1216.6319 | 1218.6584 | 1221.4656 |
| 1228.5543 | 1246.1831 | 1253.8713 |
| 1258.4693 | 1262.0538 | 1265.6145 |
| 1274.8977 | 1276.0551 | 1287.6834 |
| 1290.0029 | 1295.6641 | 1306.2382 |
| 1325.7080 | 1327.6734 | 1330.4558 |
| 1331.1652 | 1339.6993 | 1346.2148 |
| 1354.4371 | 1355.1862 | 1361.0763 |
| 1361.8533 | 1365.8509 | 1395.5566 |
| 1402.8481 | 1406.9882 | 1410.4555 |
| 1414.3627 | 1417.4966 | 1418.3406 |
| 1420.6676 | 1425.7155 | 1430.3041 |
| 1433.1922 | 1436.4305 | 1437.6179 |
| 1450.2011 | 1452.9396 | 1459.9709 |
| 1466.0159 | 1474.2334 | 1476.5732 |
| 1478.9044 | 1479.9522 | 1480.5675 |
| 1487.5585 | 1490.1230 | 1492.8803 |
| 1493.7718 | 1496.0712 | 1497.6989 |
| 1500.8553 | 1503.0651 | 1504.4448 |
| 1505.3557 | 1508.5208 | 1511.2413 |
| 1512.2378 | 1520.2657 | 1521.6546 |
| 1524.6480 | 1524.8280 | 1531.1385 |
| 1532.9551 | 1534.7038 | 1537.0106 |
| 1548.2235 | 1553.4117 | 1576.9216 |
| 1598.7838 | 1612.4025 | 1624.8491 |
| 1626.5841 | 1633.4513 | 1635.4562 |
| 1644.0078 | 1645.4716 | 1646.2000 |
| 1654.3058 | 1666.3867 | 1670.9789 |
| 1687.4901 | 1739.0203 | 2961.4830 |
| 3013.1045 | 3035.3613 | 3039.1935 |
| 3045.7365 | 3050.1919 | 3050.8476 |



|           |           |           |
|-----------|-----------|-----------|
| 3053.9974 | 3054.6883 | 3063.9856 |
| 3092.6633 | 3105.0396 | 3105.3085 |
| 3109.4121 | 3114.9581 | 3116.2810 |
| 3117.2720 | 3121.2627 | 3123.8153 |
| 3125.6755 | 3130.0572 | 3134.1467 |
| 3140.2618 | 3146.7630 | 3159.3546 |
| 3172.5324 | 3172.5466 | 3177.8320 |
| 3179.8989 | 3180.2524 | 3180.9239 |
| 3182.4524 | 3185.9486 | 3189.3544 |
| 3191.0002 | 3191.3037 | 3191.4686 |
| 3195.0527 | 3199.6498 | 3202.5737 |
| 3204.6448 | 3204.7813 | 3206.6918 |
| 3208.4016 | 3211.9436 | 3212.1822 |
| 3216.5802 | 3217.3516 | 3218.4986 |
| 3218.9879 | 3236.2974 | 3250.1288 |
| 3255.6266 | 3356.8077 | 3635.2274 |

## TS5RS2

Zero-point correction= 0.961849

Thermal correction to Energy= 1.019397

Thermal correction to Enthalpy= 1.020341

Thermal correction to Gibbs Free Energy= 0.869552

Sum of electronic and zero-point Energies= -2949.519537

Sum of electronic and thermal Energies= -2949.461990

Sum of electronic and thermal Enthalpies= -2949.461046

Sum of electronic and thermal Free Energies= -2949.611834

## Cartesian coordinates

|   |           |           |          |
|---|-----------|-----------|----------|
| C | -3.512274 | -1.003126 | 2.861895 |
| C | -2.284582 | -1.242261 | 2.178728 |
| C | -1.913947 | -0.219882 | 1.220176 |

|   |           |           |           |
|---|-----------|-----------|-----------|
| C | -2.710890 | 0.945296  | 1.075060  |
| C | -3.862944 | 1.125380  | 1.837964  |
| N | -4.239041 | 0.110385  | 2.688011  |
| H | -3.888734 | -1.747140 | 3.550246  |
| C | -2.357486 | 1.969919  | 0.036823  |
| C | -1.241014 | 2.845837  | 0.237616  |
| C | -3.120255 | 2.084273  | -1.121562 |
| C | -0.404204 | 2.765443  | 1.385793  |
| C | -0.926661 | 3.817965  | -0.768852 |
| C | -2.848097 | 3.104029  | -2.069055 |
| C | 0.725010  | 3.546378  | 1.494074  |
| H | -0.662028 | 2.073718  | 2.179129  |
| C | 0.236217  | 4.619969  | -0.617567 |
| C | -1.773602 | 3.941974  | -1.902829 |
| H | -3.494934 | 3.190893  | -2.935044 |
| C | 1.056392  | 4.475288  | 0.478373  |
| H | 1.371569  | 3.446401  | 2.359686  |
| H | 0.476361  | 5.339445  | -1.394926 |
| H | -1.546732 | 4.698598  | -2.647897 |
| H | 1.961929  | 5.064021  | 0.566491  |
| C | -0.750816 | -0.410080 | 0.415781  |
| H | -0.478607 | 0.310733  | -0.347630 |
| O | -1.612288 | -2.297488 | 2.385956  |
| C | -4.732198 | 2.347955  | 1.764197  |
| H | -4.243612 | 3.119218  | 1.172842  |
| H | -5.689689 | 2.111575  | 1.292299  |
| H | -4.928583 | 2.762888  | 2.756300  |
| C | -4.296044 | 1.187431  | -1.408066 |
| O | -5.395692 | 1.660907  | -1.733353 |
| N | -4.059715 | -0.137091 | -1.308807 |
| H | -3.134011 | -0.433189 | -1.044434 |

|   |           |           |           |
|---|-----------|-----------|-----------|
| C | -5.075164 | -1.173792 | -1.496152 |
| C | -5.920503 | -1.330021 | -0.216740 |
| H | -6.747943 | -2.021501 | -0.420175 |
| H | -5.316512 | -1.756446 | 0.590859  |
| O | -6.425004 | -0.086233 | 0.266004  |
| H | -6.516399 | 0.521431  | -0.487192 |
| C | -4.409291 | -2.488063 | -2.011051 |
| C | -3.366534 | -3.043425 | -1.016249 |
| H | -2.518877 | -2.366270 | -0.864460 |
| H | -3.799546 | -3.260718 | -0.035929 |
| H | -2.950467 | -3.976698 | -1.407822 |
| C | -3.717224 | -2.194025 | -3.358424 |
| H | -3.261193 | -3.107354 | -3.753252 |
| H | -4.439077 | -1.829089 | -4.097049 |
| H | -2.927739 | -1.442884 | -3.259828 |
| C | -5.499230 | -3.554008 | -2.240982 |
| H | -6.308546 | -3.164304 | -2.867850 |
| H | -5.067760 | -4.421366 | -2.750019 |
| H | -5.933320 | -3.908321 | -1.301849 |
| N | 0.045008  | -1.447155 | 0.566779  |
| C | 1.299456  | -1.550351 | -0.038058 |
| C | 1.887227  | -2.906281 | 0.020916  |
| O | 1.600517  | -3.739034 | 0.870818  |
| O | 2.807541  | -3.023362 | -0.942290 |
| C | 3.761387  | -4.148120 | -1.009272 |
| C | 3.001148  | -5.453527 | -1.249866 |
| H | 2.379134  | -5.706467 | -0.390955 |
| H | 2.364432  | -5.361466 | -2.134963 |
| H | 3.715770  | -6.263848 | -1.423051 |
| C | 4.622613  | -3.774840 | -2.216495 |
| H | 5.112568  | -2.810620 | -2.053017 |

|   |           |           |           |
|---|-----------|-----------|-----------|
| H | 5.387166  | -4.540040 | -2.378545 |
| H | 4.005630  | -3.703977 | -3.117271 |
| C | 4.599328  | -4.179758 | 0.269435  |
| H | 5.376282  | -4.944367 | 0.175833  |
| H | 5.077045  | -3.208281 | 0.419801  |
| H | 3.981548  | -4.409940 | 1.138155  |
| P | 4.149890  | 0.497815  | -0.899649 |
| O | 5.419213  | 0.007384  | -1.564125 |
| C | 4.303091  | 2.235451  | -0.319966 |
| C | 4.422657  | 3.284700  | -1.245370 |
| C | 4.359629  | 2.528077  | 1.050193  |
| C | 4.607793  | 4.596896  | -0.810149 |
| H | 4.362707  | 3.075114  | -2.310017 |
| C | 4.548282  | 3.841221  | 1.487547  |
| H | 4.255456  | 1.721867  | 1.769571  |
| C | 4.677669  | 4.876212  | 0.558570  |
| H | 4.696963  | 5.400941  | -1.534771 |
| H | 4.592477  | 4.055949  | 2.551339  |
| H | 4.824645  | 5.897408  | 0.897948  |
| C | 2.773368  | 0.552768  | -2.113502 |
| C | 2.767515  | -0.414670 | -3.130755 |
| C | 1.648842  | 1.380345  | -1.953976 |
| C | 1.651168  | -0.576179 | -3.952192 |
| H | 3.635377  | -1.053204 | -3.254763 |
| C | 0.530892  | 1.217375  | -2.777329 |
| H | 1.639328  | 2.149472  | -1.187341 |
| C | 0.525704  | 0.231608  | -3.767959 |
| H | 1.655653  | -1.335494 | -4.728761 |
| H | -0.335040 | 1.856697  | -2.646787 |
| H | -0.349584 | 0.100626  | -4.397571 |
| N | 3.708278  | -0.400733 | 0.401900  |

|   |           |           |           |
|---|-----------|-----------|-----------|
| C | 2.456841  | -0.397627 | 0.928123  |
| C | 2.347167  | -0.855560 | 2.356359  |
| C | 3.265258  | -1.770757 | 2.890041  |
| C | 1.317679  | -0.378584 | 3.179623  |
| C | 3.144863  | -2.211154 | 4.206558  |
| H | 4.071991  | -2.123272 | 2.259252  |
| C | 1.193942  | -0.818482 | 4.498747  |
| H | 0.614528  | 0.349359  | 2.790029  |
| C | 2.105602  | -1.740300 | 5.015856  |
| H | 3.862898  | -2.922825 | 4.604322  |
| H | 0.388869  | -0.436372 | 5.119643  |
| H | 2.012796  | -2.084380 | 6.041783  |
| H | 1.337909  | -1.085516 | -1.014990 |
| C | -5.530960 | 0.212943  | 3.404316  |
| H | -5.521787 | 1.080349  | 4.064047  |
| H | -6.324069 | 0.301160  | 2.661433  |
| H | -5.674375 | -0.688085 | 3.995561  |
| H | 1.803843  | 0.476415  | 0.749791  |
| H | -0.244164 | -2.105293 | 1.320746  |
| H | -5.742818 | -0.807186 | -2.285572 |

Vibrational frequencies

|           |          |          |
|-----------|----------|----------|
| -337.7849 | 8.5805   | 20.6199  |
| 27.6606   | 29.5118  | 34.5853  |
| 37.3795   | 42.5821  | 42.8801  |
| 46.4987   | 48.2702  | 54.7247  |
| 58.2331   | 62.2695  | 64.6278  |
| 67.4419   | 68.8131  | 76.6819  |
| 84.4445   | 87.3135  | 92.1503  |
| 96.0593   | 98.0306  | 100.3666 |
| 103.4919  | 113.7636 | 124.1251 |

|          |          |          |
|----------|----------|----------|
| 124.7518 | 133.4562 | 140.4086 |
| 144.7601 | 154.1380 | 155.5516 |
| 161.5075 | 164.6632 | 179.4780 |
| 194.2252 | 199.3358 | 201.4869 |
| 204.0676 | 221.8008 | 223.2453 |
| 235.0252 | 243.0094 | 245.4069 |
| 249.9404 | 254.7901 | 256.9950 |
| 265.4909 | 273.5220 | 280.4136 |
| 284.8302 | 286.3109 | 289.9446 |
| 292.5908 | 301.8019 | 312.1672 |
| 315.3841 | 320.3538 | 338.0494 |
| 341.1708 | 351.7521 | 354.9406 |
| 358.5156 | 363.0292 | 367.2240 |
| 369.8254 | 384.3189 | 385.7693 |
| 397.2217 | 408.0070 | 411.1350 |
| 412.0564 | 413.3510 | 414.4650 |
| 422.2812 | 424.2596 | 433.6252 |
| 437.5721 | 444.1418 | 446.2396 |
| 448.9140 | 469.6238 | 474.9918 |
| 480.9075 | 483.0903 | 501.2841 |
| 511.1610 | 513.3240 | 523.3176 |
| 530.7842 | 532.4210 | 535.0715 |
| 550.6664 | 552.8042 | 557.1397 |
| 561.8403 | 573.4451 | 576.7379 |
| 595.4325 | 614.7423 | 628.2337 |
| 631.7473 | 632.7753 | 634.9511 |
| 646.5984 | 664.0159 | 669.3964 |
| 697.9849 | 699.5871 | 712.0101 |
| 712.6642 | 715.6839 | 726.0733 |
| 748.7528 | 750.4661 | 753.4004 |
| 759.1198 | 765.5343 | 766.8995 |

|           |           |           |
|-----------|-----------|-----------|
| 769.6490  | 770.8809  | 779.3360  |
| 786.1504  | 793.0972  | 798.1982  |
| 815.5215  | 830.6783  | 840.5396  |
| 851.8299  | 860.4774  | 864.0477  |
| 866.6196  | 871.8529  | 879.4526  |
| 883.0570  | 886.3457  | 891.2374  |
| 913.2099  | 914.8859  | 923.1863  |
| 933.1265  | 938.4857  | 939.6816  |
| 943.3379  | 944.4238  | 944.8318  |
| 945.5736  | 952.4061  | 970.8708  |
| 975.7863  | 978.3261  | 981.5751  |
| 982.3881  | 987.3198  | 990.0435  |
| 991.0218  | 994.2988  | 1003.1789 |
| 1007.5084 | 1010.8736 | 1012.4463 |
| 1013.4570 | 1014.1841 | 1017.1611 |
| 1017.5462 | 1030.8180 | 1046.8919 |
| 1049.3054 | 1049.6105 | 1053.7992 |
| 1055.2979 | 1059.0606 | 1060.7390 |
| 1068.0597 | 1070.3164 | 1076.2946 |
| 1080.0591 | 1080.7527 | 1100.8748 |
| 1105.3066 | 1110.1929 | 1110.2413 |
| 1116.4260 | 1127.2865 | 1129.1381 |
| 1136.5051 | 1152.0311 | 1152.7120 |
| 1170.4235 | 1178.8370 | 1183.0570 |
| 1189.0500 | 1191.0542 | 1191.2725 |
| 1192.8346 | 1197.2060 | 1206.6597 |
| 1208.0830 | 1209.4938 | 1211.6759 |
| 1213.3026 | 1214.6462 | 1222.4829 |
| 1227.3163 | 1246.3219 | 1253.5587 |
| 1254.7778 | 1257.7876 | 1265.2303 |
| 1269.9648 | 1279.9184 | 1280.1697 |

|           |           |           |
|-----------|-----------|-----------|
| 1291.1439 | 1292.3747 | 1305.4466 |
| 1311.6393 | 1321.2375 | 1325.6344 |
| 1327.9855 | 1339.9553 | 1342.7522 |
| 1356.7419 | 1357.5130 | 1359.4571 |
| 1360.6890 | 1364.5693 | 1391.1049 |
| 1399.4226 | 1406.7161 | 1408.5031 |
| 1411.7044 | 1412.6042 | 1417.9511 |
| 1422.2158 | 1423.3749 | 1425.2560 |
| 1426.5707 | 1436.6690 | 1441.7447 |
| 1441.9588 | 1454.1822 | 1460.3254 |
| 1467.5453 | 1470.4034 | 1471.8490 |
| 1474.4296 | 1479.1818 | 1481.8011 |
| 1485.5444 | 1492.3824 | 1493.8768 |
| 1495.4267 | 1499.2745 | 1499.5128 |
| 1500.8587 | 1501.0446 | 1502.6583 |
| 1506.2521 | 1506.4194 | 1513.9204 |
| 1517.0157 | 1518.2442 | 1520.7871 |
| 1522.2135 | 1523.1065 | 1527.3649 |
| 1529.9762 | 1534.0056 | 1540.1328 |
| 1543.5052 | 1551.3836 | 1563.3060 |
| 1586.2531 | 1606.8446 | 1621.8158 |
| 1624.0639 | 1634.3331 | 1636.9920 |
| 1640.7653 | 1643.2849 | 1643.6756 |
| 1656.2006 | 1665.7733 | 1670.2308 |
| 1698.6097 | 1751.8172 | 2920.4378 |
| 3032.8668 | 3039.0343 | 3042.6602 |
| 3047.9894 | 3048.1049 | 3052.1852 |
| 3054.5871 | 3061.7966 | 3069.0838 |
| 3090.1790 | 3091.3762 | 3109.3422 |
| 3111.6914 | 3114.7507 | 3117.9968 |
| 3118.2967 | 3121.3677 | 3123.3869 |



|           |           |           |
|-----------|-----------|-----------|
| 3127.9261 | 3128.6796 | 3132.8365 |
| 3133.3952 | 3138.7420 | 3160.8236 |
| 3163.4730 | 3177.0060 | 3178.7353 |
| 3183.2590 | 3183.2982 | 3183.7238 |
| 3184.0895 | 3187.7300 | 3192.1361 |
| 3192.3819 | 3195.0676 | 3196.5249 |
| 3199.4959 | 3200.6682 | 3201.0936 |
| 3201.7429 | 3202.0094 | 3207.8234 |
| 3212.9581 | 3214.9777 | 3215.6096 |
| 3218.4706 | 3220.5897 | 3226.5642 |
| 3230.5841 | 3230.7720 | 3237.1370 |
| 3254.3965 | 3667.7358 | 3700.5227 |

### TS5RS3

Zero-point correction= 0.961406

Thermal correction to Energy= 1.019167

Thermal correction to Enthalpy= 1.020111

Thermal correction to Gibbs Free Energy= 0.866925

Sum of electronic and zero-point Energies= -2949.513510

Sum of electronic and thermal Energies= -2949.455750

Sum of electronic and thermal Enthalpies= -2949.454806

Sum of electronic and thermal Free Energies= -2949.607992

### Cartesian coordinates

|   |           |           |          |
|---|-----------|-----------|----------|
| C | -3.481850 | -1.828300 | 3.321634 |
| C | -2.221039 | -1.732215 | 2.667940 |
| C | -2.105225 | -0.631404 | 1.731918 |
| C | -3.217826 | 0.197380  | 1.466863 |
| C | -4.429222 | 0.010388  | 2.128538 |
| N | -4.507682 | -1.002760 | 3.052799 |
| H | -3.641246 | -2.603838 | 4.058092 |

|   |           |           |           |
|---|-----------|-----------|-----------|
| C | -3.109457 | 1.252565  | 0.409115  |
| C | -2.822069 | 2.603565  | 0.773060  |
| C | -3.230249 | 0.905976  | -0.930600 |
| C | -2.631919 | 3.001284  | 2.125106  |
| C | -2.707713 | 3.594186  | -0.256842 |
| C | -3.126663 | 1.897354  | -1.940707 |
| C | -2.340257 | 4.309234  | 2.439381  |
| H | -2.709745 | 2.258243  | 2.911458  |
| C | -2.410368 | 4.936258  | 0.102200  |
| C | -2.885287 | 3.209395  | -1.610268 |
| H | -3.257369 | 1.610247  | -2.979298 |
| C | -2.226727 | 5.287250  | 1.420424  |
| H | -2.192775 | 4.595761  | 3.476046  |
| H | -2.324665 | 5.679695  | -0.685279 |
| H | -2.815247 | 3.964933  | -2.387295 |
| H | -1.994214 | 6.314247  | 1.684359  |
| C | -0.867729 | -0.412779 | 1.046982  |
| H | -0.704956 | 0.481257  | 0.449128  |
| O | -1.289871 | -2.563685 | 2.907285  |
| C | -5.663376 | 0.811332  | 1.831981  |
| H | -5.425644 | 1.607753  | 1.129998  |
| H | -6.435446 | 0.184737  | 1.372894  |
| H | -6.087217 | 1.269360  | 2.730143  |
| C | -3.503629 | -0.524274 | -1.321930 |
| O | -4.444087 | -1.159245 | -0.818685 |
| N | -2.654425 | -1.016304 | -2.251468 |
| H | -1.915713 | -0.392264 | -2.549231 |
| C | -2.601775 | -2.364920 | -2.851084 |
| C | -3.970209 | -3.076772 | -2.858193 |
| H | -3.898271 | -3.917277 | -3.553091 |
| H | -4.195940 | -3.476736 | -1.865648 |

|   |           |           |           |
|---|-----------|-----------|-----------|
| O | -5.025734 | -2.246698 | -3.320330 |
| H | -5.270230 | -1.716706 | -2.543588 |
| C | -1.450197 | -3.220757 | -2.219952 |
| C | -1.712643 | -3.497761 | -0.726945 |
| H | -1.988264 | -2.584924 | -0.196858 |
| H | -2.519713 | -4.221818 | -0.582343 |
| H | -0.812401 | -3.899736 | -0.251227 |
| C | -0.123659 | -2.454056 | -2.375414 |
| H | 0.705838  | -3.042543 | -1.974201 |
| H | 0.095028  | -2.240117 | -3.425995 |
| H | -0.134726 | -1.501209 | -1.842306 |
| C | -1.319641 | -4.555330 | -2.980590 |
| H | -1.192046 | -4.389580 | -4.056467 |
| H | -0.441492 | -5.101415 | -2.620330 |
| H | -2.189361 | -5.202192 | -2.834313 |
| N | 0.112311  | -1.281803 | 1.127998  |
| C | 1.366451  | -1.128231 | 0.522647  |
| C | 2.105221  | -2.407046 | 0.468682  |
| O | 1.818181  | -3.392448 | 1.138453  |
| O | 3.128021  | -2.300716 | -0.389280 |
| C | 4.051893  | -3.422102 | -0.660430 |
| C | 3.276759  | -4.564130 | -1.320832 |
| H | 2.527040  | -4.970463 | -0.640563 |
| H | 2.781396  | -4.212692 | -2.230759 |
| H | 3.971649  | -5.363118 | -1.595947 |
| C | 5.044751  | -2.792091 | -1.636694 |
| H | 5.559991  | -1.950755 | -1.164571 |
| H | 5.789195  | -3.531806 | -1.943558 |
| H | 4.524843  | -2.427130 | -2.527273 |
| C | 4.751487  | -3.857692 | 0.628112  |
| H | 5.536180  | -4.579920 | 0.382791  |

|   |           |           |           |
|---|-----------|-----------|-----------|
| H | 5.209582  | -2.995413 | 1.117611  |
| H | 4.048725  | -4.319240 | 1.321325  |
| P | 1.813346  | 2.111655  | -0.214209 |
| O | 0.435259  | 2.388949  | 0.366614  |
| C | 1.588278  | 1.354453  | -1.877892 |
| C | 0.378355  | 1.573149  | -2.553736 |
| C | 2.572494  | 0.550888  | -2.471905 |
| C | 0.159564  | 1.007094  | -3.811230 |
| H | -0.386459 | 2.177432  | -2.079368 |
| C | 2.350968  | -0.019150 | -3.727334 |
| H | 3.491194  | 0.348213  | -1.931106 |
| C | 1.148005  | 0.211916  | -4.400266 |
| H | -0.777293 | 1.186950  | -4.332356 |
| H | 3.113290  | -0.648218 | -4.177767 |
| H | 0.977222  | -0.232847 | -5.376145 |
| C | 2.711841  | 3.667746  | -0.520512 |
| C | 1.974086  | 4.858978  | -0.569790 |
| C | 4.098866  | 3.703514  | -0.726591 |
| C | 2.615748  | 6.072861  | -0.823218 |
| H | 0.902736  | 4.825100  | -0.394648 |
| C | 4.737854  | 4.917636  | -0.980574 |
| H | 4.672632  | 2.783697  | -0.674790 |
| C | 3.997078  | 6.102761  | -1.031079 |
| H | 2.040252  | 6.993522  | -0.855924 |
| H | 5.812586  | 4.941454  | -1.136127 |
| H | 4.496603  | 7.046819  | -1.228483 |
| N | 2.866114  | 1.151732  | 0.603212  |
| C | 2.327406  | 0.250343  | 1.471541  |
| C | 3.281386  | -0.473482 | 2.374621  |
| C | 4.665780  | -0.381714 | 2.189260  |
| C | 2.785847  | -1.256251 | 3.428567  |

|   |           |           |           |
|---|-----------|-----------|-----------|
| C | 5.540647  | -1.051339 | 3.046364  |
| H | 5.037140  | 0.228745  | 1.373669  |
| C | 3.658044  | -1.931402 | 4.281250  |
| H | 1.711429  | -1.343437 | 3.572439  |
| C | 5.040048  | -1.829940 | 4.093272  |
| H | 6.613403  | -0.967218 | 2.896650  |
| H | 3.261610  | -2.534625 | 5.092768  |
| H | 5.720426  | -2.352459 | 4.759315  |
| H | 1.310567  | -0.631734 | -0.436634 |
| C | -5.777391 | -1.217711 | 3.781353  |
| H | -6.013602 | -0.331673 | 4.371170  |
| H | -6.580453 | -1.411031 | 3.070106  |
| H | -5.664440 | -2.073896 | 4.441354  |
| H | 1.417098  | 0.557952  | 2.008071  |
| H | -0.069395 | -2.082919 | 1.770062  |
| H | -2.334326 | -2.185237 | -3.900276 |

Vibrational frequencies

|           |          |          |
|-----------|----------|----------|
| -352.4171 | 10.6208  | 14.2876  |
| 24.0456   | 26.6122  | 28.5837  |
| 30.5937   | 34.2546  | 36.2388  |
| 37.8430   | 43.9328  | 48.4190  |
| 51.9306   | 58.4533  | 59.1145  |
| 61.8398   | 66.7064  | 73.4323  |
| 76.5736   | 78.7620  | 82.8415  |
| 86.7101   | 90.9692  | 97.6660  |
| 102.6475  | 111.0915 | 120.4761 |
| 126.6299  | 134.5658 | 137.5240 |
| 147.5670  | 159.9053 | 161.1681 |
| 165.8694  | 171.9982 | 176.0926 |
| 183.1647  | 191.8743 | 195.2306 |

|          |          |          |
|----------|----------|----------|
| 204.5560 | 214.6832 | 223.7021 |
| 226.2287 | 231.8596 | 237.8887 |
| 244.7390 | 247.8217 | 257.6029 |
| 260.8359 | 267.9172 | 268.9577 |
| 278.3156 | 287.4871 | 293.1637 |
| 294.9505 | 303.8941 | 312.7900 |
| 313.6218 | 327.5785 | 330.8695 |
| 341.4302 | 342.1454 | 344.7487 |
| 362.2540 | 363.7005 | 368.9651 |
| 375.3182 | 384.0889 | 398.6897 |
| 400.2977 | 405.0029 | 410.0859 |
| 412.1677 | 414.5791 | 417.4840 |
| 427.1950 | 434.3665 | 438.4307 |
| 440.6512 | 449.0039 | 450.4692 |
| 460.3599 | 467.2153 | 470.3877 |
| 472.3345 | 484.6438 | 501.2654 |
| 522.7010 | 523.5841 | 535.3767 |
| 537.3573 | 540.2506 | 546.8501 |
| 557.8577 | 563.2677 | 574.6446 |
| 592.8391 | 599.5819 | 614.8642 |
| 625.5010 | 629.6388 | 630.6026 |
| 632.2638 | 637.6088 | 645.9500 |
| 648.2768 | 664.7216 | 682.3010 |
| 696.5191 | 705.7351 | 710.1602 |
| 712.7453 | 713.7769 | 726.9435 |
| 740.3407 | 747.3766 | 754.9958 |
| 759.1833 | 764.9495 | 767.0077 |
| 771.1801 | 772.0314 | 777.4916 |
| 781.0563 | 794.4824 | 797.8334 |
| 813.0502 | 823.6906 | 845.8965 |
| 850.4829 | 854.0832 | 864.1444 |

|           |           |           |
|-----------|-----------|-----------|
| 868.1793  | 868.6414  | 872.9061  |
| 877.5799  | 885.9711  | 889.3150  |
| 892.9763  | 908.7888  | 923.4620  |
| 930.8148  | 934.1944  | 938.2796  |
| 942.5464  | 945.2795  | 946.0222  |
| 947.0673  | 949.7582  | 955.0495  |
| 967.0811  | 973.3109  | 980.0632  |
| 982.9445  | 983.3780  | 986.3006  |
| 990.3587  | 993.8074  | 1003.2832 |
| 1003.8963 | 1010.6071 | 1011.3719 |
| 1012.7074 | 1013.9261 | 1014.4926 |
| 1024.0090 | 1034.5207 | 1043.3209 |
| 1049.6215 | 1050.0412 | 1051.9733 |
| 1054.9898 | 1056.2393 | 1058.3146 |
| 1064.2934 | 1070.1587 | 1072.7492 |
| 1082.9664 | 1088.0036 | 1092.7503 |
| 1098.6981 | 1100.9675 | 1105.8873 |
| 1115.1177 | 1117.7772 | 1129.0105 |
| 1133.2986 | 1145.6801 | 1155.3299 |
| 1159.4055 | 1171.5151 | 1182.7380 |
| 1187.7379 | 1190.4129 | 1190.8345 |
| 1191.5935 | 1201.7694 | 1203.4044 |
| 1206.0080 | 1207.1397 | 1210.2666 |
| 1212.9142 | 1214.6746 | 1220.9598 |
| 1222.2765 | 1247.4401 | 1253.4880 |
| 1258.4140 | 1261.8377 | 1262.8741 |
| 1265.9675 | 1269.1246 | 1277.8933 |
| 1290.9650 | 1293.4256 | 1317.9100 |
| 1319.8674 | 1322.7944 | 1331.1583 |
| 1337.3017 | 1343.4001 | 1344.3971 |
| 1353.0882 | 1356.0425 | 1360.5494 |

|           |           |           |
|-----------|-----------|-----------|
| 1361.8213 | 1368.1237 | 1393.6064 |
| 1402.1363 | 1410.0291 | 1411.7219 |
| 1412.2385 | 1412.3820 | 1419.2146 |
| 1420.3733 | 1424.4363 | 1429.9473 |
| 1431.3622 | 1433.3100 | 1435.0306 |
| 1435.4039 | 1440.4646 | 1448.6868 |
| 1460.4411 | 1469.2803 | 1472.6261 |
| 1475.7306 | 1479.9839 | 1481.0358 |
| 1486.1872 | 1488.5612 | 1494.3004 |
| 1494.9865 | 1495.8820 | 1496.8456 |
| 1497.7828 | 1501.6596 | 1502.1222 |
| 1502.6841 | 1507.2868 | 1508.0308 |
| 1510.1990 | 1510.6827 | 1518.4138 |
| 1520.7645 | 1521.7572 | 1525.1933 |
| 1531.9080 | 1534.2583 | 1535.4777 |
| 1547.5071 | 1553.9920 | 1577.3403 |
| 1583.7173 | 1612.3014 | 1622.2221 |
| 1625.9462 | 1634.9902 | 1639.3602 |
| 1639.9161 | 1643.6211 | 1644.0491 |
| 1654.9890 | 1672.2553 | 1675.1789 |
| 1702.3235 | 1740.6902 | 2979.5756 |
| 3034.1807 | 3036.3487 | 3050.1526 |
| 3053.5376 | 3055.6564 | 3055.6820 |
| 3060.2708 | 3063.7207 | 3067.2396 |
| 3091.3919 | 3099.5091 | 3104.5273 |
| 3112.3441 | 3115.1265 | 3119.7163 |
| 3123.3785 | 3124.9150 | 3129.1903 |
| 3130.4082 | 3134.5821 | 3141.0918 |
| 3141.6324 | 3157.3010 | 3159.6821 |
| 3169.3737 | 3170.9567 | 3173.5694 |
| 3175.7807 | 3176.1094 | 3179.5167 |



|           |           |           |
|-----------|-----------|-----------|
| 3179.6056 | 3182.1066 | 3183.7194 |
| 3186.0276 | 3187.4314 | 3188.0684 |
| 3190.5593 | 3193.3169 | 3196.3599 |
| 3200.8781 | 3203.2425 | 3203.5505 |
| 3203.7299 | 3204.9635 | 3205.5860 |
| 3209.2369 | 3210.1849 | 3214.6014 |
| 3214.8638 | 3218.5532 | 3220.9178 |
| 3253.5286 | 3602.0060 | 3718.4774 |

### TS5SR

Zero-point correction= 0.961821

Thermal correction to Energy= 1.019108

Thermal correction to Enthalpy= 1.020052

Thermal correction to Gibbs Free Energy= 0.869789

Sum of electronic and zero-point Energies= -2949.524785

Sum of electronic and thermal Energies= -2949.467498

Sum of electronic and thermal Enthalpies= -2949.466554

Sum of electronic and thermal Free Energies= -2949.616817

### Cartesian coordinates

|   |           |          |           |
|---|-----------|----------|-----------|
| C | -0.984797 | 1.958914 | 4.189023  |
| C | 0.019284  | 1.546121 | 3.272172  |
| C | -0.281399 | 1.820996 | 1.882968  |
| C | -1.536314 | 2.356772 | 1.518897  |
| C | -2.447068 | 2.777884 | 2.489251  |
| N | -2.128669 | 2.556960 | 3.803093  |
| H | -0.834684 | 1.806793 | 5.248934  |
| C | -1.886015 | 2.447673 | 0.062556  |
| C | -1.321113 | 3.501282 | -0.726580 |
| C | -2.658887 | 1.460833 | -0.548781 |
| C | -0.545678 | 4.547604 | -0.148369 |

|   |           |           |           |
|---|-----------|-----------|-----------|
| C | -1.521395 | 3.509775  | -2.146205 |
| C | -2.846838 | 1.490222  | -1.958709 |
| C | 0.007020  | 5.534719  | -0.932316 |
| H | -0.393175 | 4.560162  | 0.925282  |
| C | -0.936121 | 4.543189  | -2.926982 |
| C | -2.290935 | 2.476473  | -2.735891 |
| H | -3.460045 | 0.726524  | -2.423868 |
| C | -0.184229 | 5.532220  | -2.336385 |
| H | 0.594047  | 6.323448  | -0.472185 |
| H | -1.093471 | 4.534938  | -4.001795 |
| H | -2.444487 | 2.479075  | -3.811046 |
| H | 0.262288  | 6.314605  | -2.941971 |
| C | 0.738339  | 1.619227  | 0.888209  |
| H | 0.574550  | 1.956650  | -0.122197 |
| O | 1.095309  | 0.997604  | 3.674474  |
| C | -3.725593 | 3.494620  | 2.169173  |
| H | -3.820336 | 3.601691  | 1.090599  |
| H | -4.598609 | 2.939985  | 2.519114  |
| H | -3.740938 | 4.494899  | 2.615209  |
| C | -3.430699 | 0.425264  | 0.239956  |
| O | -4.027186 | 0.727872  | 1.278219  |
| N | -3.531678 | -0.803074 | -0.328861 |
| H | -2.885085 | -1.051291 | -1.064944 |
| C | -4.475671 | -1.826316 | 0.127984  |
| C | -3.703935 | -3.082873 | 0.561287  |
| H | -4.416959 | -3.870774 | 0.820123  |
| H | -3.105415 | -3.455420 | -0.280789 |
| O | -2.911988 | -2.861487 | 1.710665  |
| H | -2.195558 | -2.217477 | 1.495309  |
| C | -5.601795 | -2.062190 | -0.931252 |
| C | -6.629851 | -3.070683 | -0.379620 |

|   |           |           |           |
|---|-----------|-----------|-----------|
| H | -6.219623 | -4.081484 | -0.302457 |
| H | -6.985476 | -2.770433 | 0.612635  |
| H | -7.498191 | -3.121770 | -1.045030 |
| C | -5.030360 | -2.592448 | -2.260521 |
| H | -5.837471 | -2.733598 | -2.987332 |
| H | -4.312810 | -1.892441 | -2.701627 |
| H | -4.522003 | -3.552810 | -2.134310 |
| C | -6.328350 | -0.726579 | -1.187078 |
| H | -5.653834 | 0.027365  | -1.601906 |
| H | -7.147763 | -0.870170 | -1.899493 |
| H | -6.751454 | -0.325049 | -0.259782 |
| N | 1.967407  | 1.264405  | 1.205965  |
| C | 2.932690  | 1.041166  | 0.230070  |
| C | 4.180597  | 0.475360  | 0.786465  |
| O | 4.289854  | 0.073925  | 1.936883  |
| O | 5.131851  | 0.422106  | -0.161928 |
| C | 6.446325  | -0.208146 | 0.086265  |
| C | 6.248127  | -1.685677 | 0.427340  |
| H | 5.737148  | -1.807175 | 1.381616  |
| H | 5.652592  | -2.175562 | -0.348656 |
| H | 7.222810  | -2.180444 | 0.477703  |
| C | 7.154211  | -0.045626 | -1.258935 |
| H | 7.212847  | 1.010319  | -1.537260 |
| H | 8.169390  | -0.446743 | -1.194278 |
| H | 6.620270  | -0.584624 | -2.046560 |
| C | 7.187687  | 0.555295  | 1.186309  |
| H | 8.206533  | 0.165928  | 1.272716  |
| H | 7.246411  | 1.618445  | 0.934398  |
| H | 6.684996  | 0.445250  | 2.146964  |
| P | 0.264541  | -1.643509 | 0.339051  |
| O | -0.811159 | -1.210468 | 1.324407  |

|   |           |           |           |
|---|-----------|-----------|-----------|
| C | 1.640214  | -2.459636 | 1.220429  |
| C | 2.500913  | -3.371422 | 0.587143  |
| C | 1.871683  | -2.110243 | 2.559046  |
| C | 3.563787  | -3.941031 | 1.289220  |
| H | 2.327976  | -3.653362 | -0.447351 |
| C | 2.937193  | -2.679670 | 3.256213  |
| H | 1.230829  | -1.379263 | 3.041682  |
| C | 3.779985  | -3.598254 | 2.626466  |
| H | 4.220865  | -4.649860 | 0.794417  |
| H | 3.111960  | -2.403703 | 4.291955  |
| H | 4.606442  | -4.042801 | 3.173202  |
| C | -0.398873 | -2.901344 | -0.813876 |
| C | -0.851715 | -2.505337 | -2.082479 |
| C | -0.566142 | -4.235345 | -0.413243 |
| C | -1.478171 | -3.423675 | -2.927196 |
| H | -0.696250 | -1.479222 | -2.402581 |
| C | -1.178042 | -5.155936 | -1.264947 |
| H | -0.220817 | -4.554836 | 0.565029  |
| C | -1.641826 | -4.750026 | -2.519655 |
| H | -1.833038 | -3.105921 | -3.902922 |
| H | -1.300701 | -6.187062 | -0.947406 |
| H | -2.125257 | -5.465576 | -3.177931 |
| N | 0.794305  | -0.423568 | -0.627980 |
| C | 2.079756  | -0.256711 | -1.018882 |
| C | 2.270899  | 0.432865  | -2.337358 |
| C | 1.227543  | 1.172678  | -2.912296 |
| C | 3.503539  | 0.369548  | -3.001238 |
| C | 1.417251  | 1.845391  | -4.119059 |
| H | 0.267170  | 1.202690  | -2.410142 |
| C | 3.690990  | 1.034522  | -4.213778 |
| H | 4.316862  | -0.192840 | -2.555053 |

|   |           |           |           |
|---|-----------|-----------|-----------|
| C | 2.649752  | 1.779388  | -4.775452 |
| H | 0.600849  | 2.421366  | -4.545202 |
| H | 4.650523  | 0.972561  | -4.719449 |
| H | 2.797042  | 2.300564  | -5.716904 |
| H | 3.066121  | 1.853774  | -0.475954 |
| C | -3.083441 | 2.963963  | 4.856409  |
| H | -3.244794 | 4.041271  | 4.812163  |
| H | -4.031201 | 2.444992  | 4.710710  |
| H | -2.670197 | 2.699991  | 5.826666  |
| H | 2.802928  | -1.061678 | -0.849423 |
| H | 2.091730  | 0.927441  | 2.177907  |
| H | -4.941842 | -1.412954 | 1.025815  |

Vibrational frequencies

|           |          |          |
|-----------|----------|----------|
| -330.7772 | 11.6585  | 23.4802  |
| 27.3512   | 34.7740  | 35.5759  |
| 37.0422   | 39.8206  | 40.7998  |
| 45.8360   | 48.5997  | 50.2661  |
| 54.0602   | 62.6190  | 64.2999  |
| 66.5286   | 67.9529  | 73.3739  |
| 74.1819   | 74.5427  | 85.3738  |
| 86.7311   | 92.8678  | 99.9796  |
| 104.4247  | 110.9327 | 121.7102 |
| 131.0001  | 134.8592 | 139.0841 |
| 144.5905  | 157.4921 | 168.7661 |
| 179.8991  | 182.9978 | 186.3950 |
| 193.9230  | 200.8934 | 202.7483 |
| 214.3733  | 222.0073 | 225.6007 |
| 230.3587  | 230.7000 | 241.9827 |
| 252.2497  | 255.7261 | 259.5843 |
| 265.2610  | 270.7170 | 275.3055 |

|          |          |          |
|----------|----------|----------|
| 286.1561 | 290.0574 | 291.6883 |
| 294.1816 | 300.3944 | 312.5254 |
| 316.3448 | 319.4472 | 332.6860 |
| 345.6155 | 353.0227 | 358.6755 |
| 361.6454 | 365.2916 | 372.3423 |
| 381.5113 | 384.4847 | 390.8258 |
| 397.7582 | 404.1134 | 408.5497 |
| 410.4929 | 415.2144 | 419.0062 |
| 421.6153 | 438.7533 | 441.8937 |
| 445.8897 | 454.1040 | 461.6795 |
| 469.0213 | 476.9095 | 486.8066 |
| 489.4569 | 494.0877 | 514.2164 |
| 519.7787 | 524.8031 | 533.1944 |
| 537.2639 | 543.2191 | 546.6137 |
| 557.5691 | 564.5015 | 570.6729 |
| 579.1558 | 585.7379 | 598.2199 |
| 614.9142 | 626.6909 | 629.8068 |
| 631.2974 | 633.9471 | 643.5010 |
| 662.9196 | 677.2031 | 693.7513 |
| 701.1014 | 712.8976 | 713.6566 |
| 715.1083 | 730.5975 | 742.7327 |
| 746.0125 | 750.6074 | 757.9567 |
| 762.0414 | 763.5709 | 766.2257 |
| 775.5082 | 778.0644 | 781.2462 |
| 782.2883 | 795.5839 | 800.5283 |
| 812.1141 | 816.9706 | 845.2571 |
| 851.1081 | 856.9355 | 859.3883 |
| 865.0265 | 867.0351 | 872.8624 |
| 873.7248 | 889.2269 | 891.1307 |
| 904.5122 | 910.7004 | 916.1611 |
| 921.7769 | 935.2034 | 936.8523 |

|           |           |           |
|-----------|-----------|-----------|
| 938.9301  | 944.2876  | 945.7259  |
| 946.1051  | 947.6745  | 956.0640  |
| 965.3960  | 974.2068  | 977.0670  |
| 981.9583  | 985.7668  | 987.9662  |
| 992.4528  | 993.2116  | 1003.4020 |
| 1007.4524 | 1008.7857 | 1012.7956 |
| 1013.9830 | 1014.7531 | 1015.6065 |
| 1024.1901 | 1027.4053 | 1032.3396 |
| 1035.3118 | 1049.7085 | 1051.4809 |
| 1052.0058 | 1053.7192 | 1056.8504 |
| 1058.1759 | 1066.2934 | 1070.6490 |
| 1081.6819 | 1097.3581 | 1104.5176 |
| 1104.9719 | 1108.6936 | 1113.8105 |
| 1114.5320 | 1116.5012 | 1127.3235 |
| 1132.1568 | 1132.5473 | 1144.1782 |
| 1148.8473 | 1154.4069 | 1183.0120 |
| 1184.1062 | 1187.4098 | 1188.0083 |
| 1191.9045 | 1192.5417 | 1200.7758 |
| 1204.6826 | 1208.6211 | 1210.5037 |
| 1214.7403 | 1223.3451 | 1224.3577 |
| 1234.9366 | 1247.5257 | 1249.3568 |
| 1251.4473 | 1262.2233 | 1264.5700 |
| 1267.0915 | 1271.4260 | 1276.4634 |
| 1290.7720 | 1292.8867 | 1308.3096 |
| 1311.5076 | 1323.2076 | 1325.8850 |
| 1330.9985 | 1341.4791 | 1344.6616 |
| 1352.4005 | 1357.0645 | 1359.6298 |
| 1360.8418 | 1363.6175 | 1381.5829 |
| 1398.9315 | 1410.1343 | 1411.5437 |
| 1414.5646 | 1415.4243 | 1415.9763 |
| 1420.7017 | 1423.2249 | 1426.5840 |

|           |           |           |
|-----------|-----------|-----------|
| 1438.2923 | 1438.7273 | 1439.0422 |
| 1442.6133 | 1448.2864 | 1453.9867 |
| 1465.3331 | 1466.4026 | 1471.7610 |
| 1475.7128 | 1477.3947 | 1478.8031 |
| 1480.3091 | 1485.2859 | 1491.7562 |
| 1493.5880 | 1494.4682 | 1497.0522 |
| 1499.0072 | 1501.5406 | 1502.0104 |
| 1502.7566 | 1505.0971 | 1506.3015 |
| 1512.8850 | 1517.0903 | 1519.2809 |
| 1521.0127 | 1523.3169 | 1525.6861 |
| 1529.9162 | 1532.1346 | 1534.0018 |
| 1550.0189 | 1552.1166 | 1560.8218 |
| 1577.3557 | 1607.5277 | 1622.4024 |
| 1625.5369 | 1634.9175 | 1639.2159 |
| 1642.5906 | 1644.7651 | 1645.6590 |
| 1653.6815 | 1656.7395 | 1672.4871 |
| 1716.1072 | 1749.4532 | 3035.1374 |
| 3038.0721 | 3041.2413 | 3045.6586 |
| 3052.4079 | 3053.8631 | 3054.3985 |
| 3055.6391 | 3060.5279 | 3090.7175 |
| 3096.2554 | 3102.7406 | 3104.2537 |
| 3107.8426 | 3109.7009 | 3119.9675 |
| 3123.8840 | 3123.9056 | 3124.9671 |
| 3125.2809 | 3128.6149 | 3132.2199 |
| 3137.0579 | 3166.9044 | 3174.2566 |
| 3175.7159 | 3178.3830 | 3179.3515 |
| 3180.3351 | 3182.7993 | 3185.1635 |
| 3185.8777 | 3186.6307 | 3188.1295 |
| 3189.0104 | 3190.1573 | 3194.5743 |
| 3194.9842 | 3195.8994 | 3201.2799 |
| 3201.8870 | 3202.5287 | 3205.6833 |



|           |           |           |
|-----------|-----------|-----------|
| 3207.3222 | 3210.5278 | 3210.9469 |
| 3211.2718 | 3213.7776 | 3214.3000 |
| 3216.2356 | 3224.2915 | 3253.4613 |
| 3290.5239 | 3389.5568 | 3623.8816 |

### TS5SR1

Zero-point correction= 0.961895

Thermal correction to Energy= 1.019180

Thermal correction to Enthalpy= 1.020124

Thermal correction to Gibbs Free Energy= 0.870390

Sum of electronic and zero-point Energies= -2949.521455

Sum of electronic and thermal Energies= -2949.464170

Sum of electronic and thermal Enthalpies= -2949.463226

Sum of electronic and thermal Free Energies= -2949.612960

### Cartesian coordinates

|   |           |           |           |
|---|-----------|-----------|-----------|
| C | -1.364660 | 0.388601  | 4.171266  |
| C | -0.361388 | 0.747602  | 3.231169  |
| C | -0.863300 | 1.261919  | 1.971855  |
| C | -2.252470 | 1.381250  | 1.750263  |
| C | -3.168387 | 1.024246  | 2.740051  |
| N | -2.679877 | 0.524771  | 3.919426  |
| H | -1.076497 | -0.017313 | 5.130789  |
| C | -2.756768 | 1.963171  | 0.461192  |
| C | -2.800265 | 3.392753  | 0.351512  |
| C | -3.151967 | 1.171728  | -0.614477 |
| C | -2.389818 | 4.251294  | 1.411093  |
| C | -3.270760 | 3.991712  | -0.863348 |
| C | -3.647252 | 1.787179  | -1.798053 |
| C | -2.433926 | 5.620323  | 1.269252  |
| H | -2.037459 | 3.819190  | 2.340334  |

|   |           |           |           |
|---|-----------|-----------|-----------|
| C | -3.304422 | 5.407081  | -0.976734 |
| C | -3.703899 | 3.152301  | -1.920999 |
| H | -4.015332 | 1.166738  | -2.608483 |
| C | -2.892655 | 6.206772  | 0.064931  |
| H | -2.115049 | 6.256858  | 2.088720  |
| H | -3.662103 | 5.846332  | -1.903538 |
| H | -4.089101 | 3.604036  | -2.830279 |
| H | -2.919958 | 7.287567  | -0.031801 |
| C | 0.060985  | 1.597655  | 0.933371  |
| H | -0.303737 | 1.943406  | -0.026320 |
| O | 0.874238  | 0.590065  | 3.489690  |
| C | -4.653704 | 1.087087  | 2.543732  |
| H | -4.882135 | 1.652679  | 1.642612  |
| H | -5.063293 | 0.080102  | 2.411854  |
| H | -5.166773 | 1.565289  | 3.381523  |
| C | -3.053444 | -0.332635 | -0.533339 |
| O | -3.184541 | -0.933594 | 0.535396  |
| N | -2.802490 | -0.963448 | -1.712108 |
| H | -2.639910 | -0.389419 | -2.526377 |
| C | -2.425798 | -2.381661 | -1.830614 |
| C | -1.247767 | -2.409049 | -2.838350 |
| H | -1.628062 | -2.163426 | -3.841571 |
| H | -0.563889 | -1.604320 | -2.545699 |
| O | -0.559804 | -3.642449 | -2.894308 |
| H | 0.303406  | -3.506351 | -2.435324 |
| C | -3.650921 | -3.290702 | -2.167257 |
| C | -4.232553 | -2.951405 | -3.551931 |
| H | -4.492486 | -1.889110 | -3.623538 |
| H | -3.533509 | -3.187811 | -4.360127 |
| H | -5.146204 | -3.529028 | -3.729492 |
| C | -4.747612 | -3.080527 | -1.103607 |

|   |           |           |           |
|---|-----------|-----------|-----------|
| H | -5.583027 | -3.765142 | -1.289239 |
| H | -4.360319 | -3.267207 | -0.098253 |
| H | -5.138588 | -2.059543 | -1.123261 |
| C | -3.228014 | -4.772319 | -2.129648 |
| H | -2.806943 | -5.030995 | -1.151613 |
| H | -4.102038 | -5.411151 | -2.302398 |
| H | -2.471941 | -4.996070 | -2.882616 |
| N | 1.361689  | 1.556629  | 1.102633  |
| C | 2.275369  | 1.718117  | 0.065240  |
| C | 3.681534  | 1.646602  | 0.512974  |
| O | 4.028712  | 1.353415  | 1.648454  |
| O | 4.495016  | 1.901157  | -0.526800 |
| C | 5.965578  | 1.788908  | -0.424011 |
| C | 6.343652  | 0.355550  | -0.051597 |
| H | 6.022244  | 0.108966  | 0.959185  |
| H | 5.876377  | -0.351873 | -0.742320 |
| H | 7.429465  | 0.237348  | -0.118739 |
| C | 6.420233  | 2.125464  | -1.843998 |
| H | 6.082676  | 3.125977  | -2.129042 |
| H | 7.511716  | 2.095094  | -1.902676 |
| H | 6.014065  | 1.402960  | -2.558032 |
| C | 6.491389  | 2.816378  | 0.580111  |
| H | 7.585434  | 2.812096  | 0.563491  |
| H | 6.147091  | 3.819533  | 0.311271  |
| H | 6.153063  | 2.583414  | 1.589876  |
| P | 1.526716  | -2.192396 | -0.408222 |
| O | 1.785338  | -3.063418 | -1.640164 |
| C | 0.234904  | -2.970334 | 0.606498  |
| C | 0.025820  | -4.351778 | 0.471464  |
| C | -0.535886 | -2.245091 | 1.518380  |
| C | -0.938729 | -4.993632 | 1.247398  |

|   |           |           |           |
|---|-----------|-----------|-----------|
| H | 0.605810  | -4.908416 | -0.257040 |
| C | -1.496541 | -2.887061 | 2.299316  |
| H | -0.403470 | -1.176227 | 1.586773  |
| C | -1.698851 | -4.261428 | 2.166439  |
| H | -1.102367 | -6.061287 | 1.134119  |
| H | -2.100368 | -2.307869 | 2.990190  |
| H | -2.451629 | -4.761740 | 2.768756  |
| C | 3.031011  | -2.222560 | 0.636056  |
| C | 3.027666  | -1.650794 | 1.917058  |
| C | 4.189828  | -2.857416 | 0.166702  |
| C | 4.167258  | -1.720722 | 2.717246  |
| H | 2.140618  | -1.152167 | 2.296608  |
| C | 5.330489  | -2.923173 | 0.968826  |
| H | 4.180053  | -3.306096 | -0.821383 |
| C | 5.318603  | -2.357628 | 2.246344  |
| H | 4.158556  | -1.270890 | 3.705428  |
| H | 6.225481  | -3.415217 | 0.599173  |
| H | 6.204827  | -2.410804 | 2.872116  |
| N | 1.015840  | -0.657237 | -0.709407 |
| C | 1.909532  | 0.223784  | -1.232748 |
| C | 1.435328  | 1.057840  | -2.385895 |
| C | 0.065872  | 1.228872  | -2.632647 |
| C | 2.360658  | 1.711244  | -3.213645 |
| C | -0.372155 | 2.045495  | -3.675530 |
| H | -0.641381 | 0.708508  | -1.998613 |
| C | 1.923545  | 2.513316  | -4.267794 |
| H | 3.422608  | 1.600143  | -3.013918 |
| C | 0.555370  | 2.687744  | -4.500005 |
| H | -1.436996 | 2.181080  | -3.840730 |
| H | 2.650389  | 3.006666  | -4.906768 |
| H | 0.216653  | 3.318469  | -5.316555 |

|   |           |           |           |
|---|-----------|-----------|-----------|
| H | 2.054387  | 2.543665  | -0.600311 |
| C | -3.628069 | 0.102545  | 4.974921  |
| H | -4.180748 | 0.969366  | 5.338471  |
| H | -4.322057 | -0.633543 | 4.569756  |
| H | -3.067234 | -0.340138 | 5.794046  |
| H | 2.960963  | -0.069750 | -1.338326 |
| H | 1.665477  | 1.181818  | 2.023447  |
| H | -2.041162 | -2.682588 | -0.853413 |

Vibrational frequencies

|           |          |          |
|-----------|----------|----------|
| -358.1404 | 20.8010  | 22.5982  |
| 26.6164   | 30.6370  | 32.7743  |
| 34.9715   | 40.8397  | 42.7442  |
| 43.7763   | 46.9327  | 52.9935  |
| 56.4169   | 57.5146  | 66.5806  |
| 67.8700   | 69.5061  | 72.4304  |
| 76.5499   | 83.6248  | 88.3951  |
| 93.0184   | 99.4964  | 101.2188 |
| 111.8474  | 117.8876 | 124.3423 |
| 129.2079  | 131.8529 | 139.6738 |
| 144.9810  | 154.3858 | 168.6428 |
| 170.8720  | 175.1004 | 183.9661 |
| 187.0566  | 194.7159 | 203.2435 |
| 211.2349  | 217.6416 | 229.0833 |
| 233.3927  | 236.3996 | 239.0428 |
| 246.2564  | 251.2444 | 257.5236 |
| 262.6996  | 270.3987 | 276.4463 |
| 286.2041  | 290.0020 | 295.3559 |
| 297.5544  | 306.4777 | 309.0947 |
| 324.1090  | 332.1737 | 337.0426 |
| 340.3386  | 346.2117 | 361.7722 |

|          |          |          |
|----------|----------|----------|
| 372.3075 | 375.4785 | 379.7296 |
| 382.1099 | 392.3235 | 395.9318 |
| 396.3347 | 403.5840 | 409.4554 |
| 411.3770 | 414.1907 | 420.3262 |
| 425.4213 | 431.7309 | 438.5205 |
| 440.4076 | 442.9445 | 451.3328 |
| 464.2055 | 469.9655 | 470.8975 |
| 484.4389 | 486.6177 | 491.9920 |
| 520.4259 | 522.8084 | 529.4147 |
| 535.9438 | 541.4767 | 552.5922 |
| 560.8827 | 562.7134 | 573.7273 |
| 579.8312 | 592.8460 | 597.8956 |
| 629.0979 | 629.3882 | 629.9461 |
| 633.6215 | 633.9895 | 640.3646 |
| 666.5338 | 680.1555 | 687.9290 |
| 700.9843 | 707.1043 | 713.9952 |
| 716.0065 | 718.0912 | 730.4216 |
| 737.5725 | 739.1357 | 746.2154 |
| 749.9637 | 759.5276 | 762.3971 |
| 764.3585 | 766.2619 | 777.9482 |
| 783.6506 | 795.0192 | 797.8790 |
| 811.3781 | 816.4802 | 848.0181 |
| 848.2873 | 856.3336 | 862.5236 |
| 863.8132 | 870.3824 | 872.6994 |
| 876.9640 | 888.9267 | 889.1338 |
| 894.9602 | 911.6516 | 925.3411 |
| 933.4017 | 936.3798 | 937.6921 |
| 940.4123 | 942.3412 | 944.5993 |
| 945.9234 | 949.8873 | 955.3475 |
| 972.3494 | 977.6913 | 980.5083 |
| 980.5929 | 986.3186 | 991.2677 |

|           |           |           |
|-----------|-----------|-----------|
| 995.9036  | 1002.4152 | 1006.3515 |
| 1008.4732 | 1009.6402 | 1012.9826 |
| 1013.6844 | 1015.3330 | 1018.3603 |
| 1023.5656 | 1033.2859 | 1039.6496 |
| 1050.1550 | 1052.6746 | 1053.7103 |
| 1057.0897 | 1059.0444 | 1063.9134 |
| 1069.6004 | 1070.6976 | 1076.9606 |
| 1084.1734 | 1087.2018 | 1090.7892 |
| 1102.5809 | 1104.8311 | 1111.6784 |
| 1112.4404 | 1115.1078 | 1121.4667 |
| 1131.2878 | 1132.5601 | 1146.4009 |
| 1147.0179 | 1154.7306 | 1182.6187 |
| 1183.7501 | 1190.6789 | 1191.0992 |
| 1191.6444 | 1192.8386 | 1204.4731 |
| 1206.6046 | 1209.4742 | 1210.1402 |
| 1212.7296 | 1219.4440 | 1226.9022 |
| 1231.5356 | 1247.5754 | 1248.7085 |
| 1250.9204 | 1262.5503 | 1264.4310 |
| 1267.5365 | 1276.8327 | 1277.7869 |
| 1290.5717 | 1292.5011 | 1298.2688 |
| 1313.1344 | 1324.9059 | 1328.2016 |
| 1333.3700 | 1337.2406 | 1349.6411 |
| 1353.8463 | 1356.9181 | 1359.7914 |
| 1361.2525 | 1362.6700 | 1399.8132 |
| 1408.0945 | 1409.3682 | 1411.2997 |
| 1411.5077 | 1413.0946 | 1414.3734 |
| 1418.4750 | 1424.0101 | 1425.0052 |
| 1434.6570 | 1435.4471 | 1438.3214 |
| 1439.2222 | 1450.5153 | 1457.3420 |
| 1467.1082 | 1473.7652 | 1478.2163 |
| 1478.9802 | 1480.3219 | 1483.3232 |

|           |           |           |
|-----------|-----------|-----------|
| 1487.9650 | 1491.2051 | 1491.8703 |
| 1494.4985 | 1496.6774 | 1496.9126 |
| 1499.5452 | 1500.7170 | 1502.3583 |
| 1503.5181 | 1506.2659 | 1510.3380 |
| 1512.0107 | 1514.8441 | 1517.4214 |
| 1522.9305 | 1524.7986 | 1527.1879 |
| 1531.6667 | 1533.0395 | 1533.9993 |
| 1550.1486 | 1552.3573 | 1554.6546 |
| 1576.9094 | 1609.5945 | 1625.8799 |
| 1628.7527 | 1633.6195 | 1639.4750 |
| 1644.6261 | 1646.1233 | 1649.0773 |
| 1653.1657 | 1669.9723 | 1671.0725 |
| 1726.6635 | 1751.0933 | 2994.9154 |
| 3032.5388 | 3034.8858 | 3036.2775 |
| 3042.7361 | 3050.0432 | 3055.3591 |
| 3059.3260 | 3061.1507 | 3073.4238 |
| 3092.5574 | 3097.6859 | 3101.2700 |
| 3112.1836 | 3112.7132 | 3124.1309 |
| 3124.7582 | 3124.8504 | 3126.8397 |
| 3129.6249 | 3131.5547 | 3136.3783 |
| 3154.8080 | 3155.4264 | 3164.9690 |
| 3176.8647 | 3177.8496 | 3178.2678 |
| 3179.0448 | 3179.9994 | 3181.6775 |
| 3186.7122 | 3188.9226 | 3188.9902 |
| 3189.1685 | 3194.6759 | 3196.2277 |
| 3196.7316 | 3197.6214 | 3204.4470 |
| 3204.6269 | 3205.4353 | 3206.4463 |
| 3206.6534 | 3206.9452 | 3209.2979 |
| 3209.9406 | 3211.7837 | 3222.7831 |
| 3232.1234 | 3234.5055 | 3256.5897 |
| 3279.7138 | 3376.3495 | 3633.7228 |



## TS5SR2

Zero-point correction= 0.961843

Thermal correction to Energy= 1.019395

Thermal correction to Enthalpy= 1.020339

Thermal correction to Gibbs Free Energy= 0.871158

Sum of electronic and zero-point Energies= -2949.512901

Sum of electronic and thermal Energies= -2949.455349

Sum of electronic and thermal Enthalpies= -2949.454405

Sum of electronic and thermal Free Energies= -2949.603585

### Cartesian coordinates

|   |           |           |           |
|---|-----------|-----------|-----------|
| C | -2.059432 | 1.659734  | 4.383178  |
| C | -0.837990 | 1.430959  | 3.684772  |
| C | -0.916855 | 1.653435  | 2.256068  |
| C | -2.161137 | 1.901174  | 1.637362  |
| C | -3.313831 | 2.085889  | 2.393433  |
| N | -3.208287 | 1.972437  | 3.757827  |
| H | -2.085306 | 1.565454  | 5.459867  |
| C | -2.227537 | 1.901186  | 0.137932  |
| C | -2.023321 | 3.140766  | -0.547771 |
| C | -2.401613 | 0.718070  | -0.586439 |
| C | -1.791468 | 4.360706  | 0.149744  |
| C | -2.032619 | 3.166569  | -1.981273 |
| C | -2.403295 | 0.771385  | -2.009169 |
| C | -1.587763 | 5.537155  | -0.536012 |
| H | -1.772382 | 4.355748  | 1.233519  |
| C | -1.827183 | 4.397843  | -2.658403 |
| C | -2.227357 | 1.952185  | -2.684677 |
| H | -2.560074 | -0.125782 | -2.594840 |
| C | -1.608746 | 5.559331  | -1.952526 |

|   |           |           |           |
|---|-----------|-----------|-----------|
| H | -1.408834 | 6.456636  | 0.012087  |
| H | -1.835149 | 4.402393  | -3.744249 |
| H | -2.228121 | 1.960601  | -3.770027 |
| H | -1.445571 | 6.494796  | -2.478016 |
| C | 0.247356  | 1.500007  | 1.450741  |
| H | 0.219716  | 1.763843  | 0.400903  |
| O | 0.217392  | 1.062283  | 4.282429  |
| C | -4.669750 | 2.287999  | 1.784336  |
| H | -4.570758 | 2.453099  | 0.712747  |
| H | -5.295307 | 1.399706  | 1.926561  |
| H | -5.195450 | 3.147457  | 2.208509  |
| C | -2.659107 | -0.589702 | 0.128420  |
| O | -3.013916 | -0.622807 | 1.311081  |
| N | -2.499091 | -1.734499 | -0.598807 |
| H | -2.174415 | -1.670370 | -1.553329 |
| C | -3.040984 | -3.030365 | -0.162997 |
| C | -2.054697 | -4.131144 | -0.579096 |
| H | -2.451716 | -5.106626 | -0.290435 |
| H | -1.949160 | -4.140021 | -1.671328 |
| O | -0.782524 | -4.011739 | 0.039212  |
| H | -0.568171 | -3.072882 | 0.135968  |
| C | -4.505816 | -3.267086 | -0.670967 |
| C | -5.079124 | -4.524259 | 0.014580  |
| H | -4.554306 | -5.437357 | -0.279416 |
| H | -5.026720 | -4.436796 | 1.105444  |
| H | -6.130984 | -4.651994 | -0.260737 |
| C | -4.554384 | -3.443678 | -2.201231 |
| H | -5.594226 | -3.520956 | -2.534800 |
| H | -4.108962 | -2.587886 | -2.719557 |
| H | -4.037816 | -4.350053 | -2.531591 |
| C | -5.390092 | -2.064278 | -0.284384 |

|   |           |           |           |
|---|-----------|-----------|-----------|
| H | -5.092925 | -1.156611 | -0.817748 |
| H | -6.432284 | -2.272368 | -0.547095 |
| H | -5.336265 | -1.858266 | 0.788023  |
| N | 1.374481  | 0.997841  | 1.903285  |
| C | 2.386599  | 0.545465  | 1.049981  |
| C | 3.609081  | 0.105396  | 1.744157  |
| O | 3.650594  | -0.203951 | 2.928607  |
| O | 4.616337  | 0.037710  | 0.861654  |
| C | 5.948375  | -0.491941 | 1.211101  |
| C | 5.825245  | -1.962535 | 1.612370  |
| H | 5.215302  | -2.074167 | 2.509155  |
| H | 5.369766  | -2.534876 | 0.799905  |
| H | 6.821265  | -2.371582 | 1.806370  |
| C | 6.713035  | -0.343742 | -0.104440 |
| H | 6.756354  | 0.707025  | -0.405076 |
| H | 7.734451  | -0.716518 | 0.012304  |
| H | 6.220482  | -0.911688 | -0.898599 |
| C | 6.574599  | 0.367179  | 2.311692  |
| H | 7.612996  | 0.058958  | 2.465915  |
| H | 6.568667  | 1.420499  | 2.015621  |
| H | 6.030240  | 0.259974  | 3.249867  |
| P | 2.468734  | -0.761411 | -2.352209 |
| O | 3.658383  | -1.269504 | -3.137454 |
| C | 2.555644  | 1.065925  | -2.194441 |
| C | 1.425502  | 1.879345  | -2.003910 |
| C | 3.831110  | 1.643912  | -2.104951 |
| C | 1.570279  | 3.236937  | -1.707823 |
| H | 0.429348  | 1.456299  | -2.087148 |
| C | 3.976303  | 2.999471  | -1.807371 |
| H | 4.705018  | 1.019098  | -2.255987 |
| C | 2.846639  | 3.795687  | -1.600109 |

|   |           |           |           |
|---|-----------|-----------|-----------|
| H | 0.691614  | 3.855755  | -1.560589 |
| H | 4.969065  | 3.433602  | -1.733313 |
| H | 2.958934  | 4.849148  | -1.361889 |
| C | 0.890845  | -1.055125 | -3.255384 |
| C | 0.090381  | -2.169489 | -2.958820 |
| C | 0.519592  | -0.220310 | -4.322231 |
| C | -1.048294 | -2.440754 | -3.725352 |
| H | 0.357267  | -2.821840 | -2.131910 |
| C | -0.633723 | -0.473963 | -5.065248 |
| H | 1.127895  | 0.645699  | -4.564801 |
| C | -1.420141 | -1.589556 | -4.769582 |
| H | -1.646805 | -3.322012 | -3.520351 |
| H | -0.913055 | 0.192404  | -5.875721 |
| H | -2.312210 | -1.800929 | -5.351099 |
| N | 2.346813  | -1.457514 | -0.868728 |
| C | 1.592166  | -0.987485 | 0.149488  |
| C | 1.334186  | -1.942688 | 1.280718  |
| C | 2.245957  | -2.970917 | 1.560167  |
| C | 0.191925  | -1.818392 | 2.088499  |
| C | 2.039332  | -3.832640 | 2.634429  |
| H | 3.110491  | -3.082413 | 0.917096  |
| C | -0.017935 | -2.686143 | 3.162132  |
| H | -0.557321 | -1.065506 | 1.873223  |
| C | 0.908537  | -3.689550 | 3.445776  |
| H | 2.759017  | -4.620193 | 2.839058  |
| H | -0.912290 | -2.576599 | 3.768508  |
| H | 0.747045  | -4.363291 | 4.282074  |
| H | 2.549964  | 1.184431  | 0.193719  |
| C | -4.415922 | 2.164492  | 4.591090  |
| H | -4.791889 | 3.179628  | 4.460828  |
| H | -5.182355 | 1.447784  | 4.295787  |

|   |           |           |           |
|---|-----------|-----------|-----------|
| H | -4.153370 | 2.006148  | 5.633966  |
| H | 0.689178  | -0.394232 | -0.085712 |
| H | 1.368621  | 0.741203  | 2.907455  |
| H | -3.062487 | -2.990981 | 0.929398  |

Vibrational frequencies

|           |          |          |
|-----------|----------|----------|
| -365.8154 | 23.5600  | 25.9512  |
| 31.8220   | 34.9882  | 41.2379  |
| 41.4360   | 42.0730  | 44.9040  |
| 47.4252   | 50.4123  | 52.8856  |
| 53.7984   | 57.6830  | 62.5656  |
| 63.7697   | 71.0299  | 80.3191  |
| 85.7107   | 87.7790  | 88.6117  |
| 95.3419   | 99.7221  | 101.3824 |
| 111.2544  | 113.7110 | 121.5422 |
| 129.4869  | 134.9906 | 141.0501 |
| 143.0251  | 144.9935 | 154.4828 |
| 158.8618  | 179.1476 | 185.1903 |
| 188.4104  | 195.4430 | 198.3985 |
| 198.7270  | 223.8065 | 228.3812 |
| 230.6396  | 231.3555 | 245.2357 |
| 254.9811  | 260.4535 | 263.2324 |
| 268.9293  | 274.9113 | 280.1327 |
| 283.0338  | 290.4886 | 292.6040 |
| 297.0382  | 303.5696 | 306.4317 |
| 312.4310  | 330.8615 | 335.4115 |
| 344.3663  | 346.5136 | 353.1209 |
| 355.6231  | 361.0499 | 364.2073 |
| 369.3139  | 378.7974 | 381.5488 |
| 390.5540  | 394.5135 | 397.2635 |
| 402.9570  | 411.8160 | 414.5722 |

|           |           |           |
|-----------|-----------|-----------|
| 418.3881  | 424.3125  | 428.5208  |
| 429.6577  | 437.3582  | 441.5742  |
| 443.4302  | 462.4556  | 476.5551  |
| 484.6573  | 493.5943  | 500.1293  |
| 503.1205  | 517.2500  | 521.9892  |
| 534.2403  | 535.2248  | 543.6878  |
| 548.6646  | 556.8013  | 560.8317  |
| 563.0563  | 577.6499  | 584.8605  |
| 595.2622  | 615.4410  | 627.4534  |
| 631.8753  | 632.1655  | 633.4310  |
| 635.2451  | 662.5986  | 674.5446  |
| 687.9353  | 698.4755  | 716.5957  |
| 717.4965  | 718.3669  | 725.8539  |
| 737.8903  | 744.1879  | 746.6301  |
| 759.5092  | 761.4361  | 766.9324  |
| 770.7171  | 779.9981  | 780.9417  |
| 782.2563  | 794.6651  | 799.1561  |
| 805.8402  | 815.0218  | 836.2173  |
| 838.6111  | 849.5022  | 866.6030  |
| 872.8410  | 878.4783  | 880.2957  |
| 886.0686  | 888.8061  | 889.9025  |
| 894.5534  | 903.1591  | 913.7708  |
| 921.3256  | 936.9195  | 938.9045  |
| 944.4443  | 946.2445  | 947.8256  |
| 948.5804  | 950.8544  | 956.9890  |
| 959.2956  | 965.3086  | 976.9255  |
| 979.9378  | 984.8660  | 990.8711  |
| 998.2084  | 1003.0934 | 1004.8478 |
| 1009.6675 | 1012.1948 | 1012.9764 |
| 1014.0798 | 1015.0545 | 1023.0955 |
| 1026.9865 | 1034.8885 | 1041.6314 |

|           |           |           |
|-----------|-----------|-----------|
| 1047.8583 | 1051.5915 | 1053.0388 |
| 1054.0870 | 1055.0463 | 1055.6175 |
| 1057.6913 | 1067.0268 | 1071.9342 |
| 1080.5490 | 1084.2974 | 1103.5037 |
| 1106.4983 | 1110.2533 | 1110.9464 |
| 1118.6158 | 1126.9474 | 1130.7705 |
| 1133.6556 | 1146.1987 | 1155.5269 |
| 1167.5478 | 1175.6509 | 1181.9926 |
| 1188.2256 | 1192.0032 | 1194.8754 |
| 1194.9792 | 1200.4605 | 1203.1325 |
| 1207.1005 | 1209.6283 | 1214.6354 |
| 1222.0355 | 1222.3583 | 1224.5286 |
| 1229.3154 | 1235.5127 | 1247.3647 |
| 1253.6860 | 1257.7730 | 1261.1129 |
| 1264.5322 | 1268.7727 | 1277.9610 |
| 1278.5195 | 1290.7236 | 1304.2118 |
| 1319.2853 | 1321.9041 | 1323.1386 |
| 1323.5436 | 1330.6615 | 1343.1321 |
| 1359.3517 | 1359.8382 | 1360.8003 |
| 1362.7384 | 1363.2044 | 1367.2799 |
| 1388.9934 | 1400.5059 | 1408.9939 |
| 1411.0895 | 1411.4789 | 1414.6816 |
| 1418.3654 | 1421.0505 | 1422.9939 |
| 1429.5866 | 1436.9413 | 1440.1430 |
| 1441.3591 | 1443.9734 | 1451.9165 |
| 1462.8218 | 1468.0758 | 1470.7745 |
| 1476.1593 | 1480.5783 | 1483.3822 |
| 1485.9870 | 1491.2190 | 1491.5055 |
| 1494.1386 | 1495.6721 | 1499.3535 |
| 1499.7656 | 1500.1997 | 1502.9570 |
| 1503.2315 | 1506.5955 | 1513.1288 |

|           |           |           |
|-----------|-----------|-----------|
| 1513.8524 | 1517.9793 | 1522.8274 |
| 1524.4257 | 1525.2369 | 1527.2448 |
| 1532.3461 | 1533.5413 | 1534.7931 |
| 1548.5072 | 1552.3013 | 1559.6029 |
| 1586.1337 | 1602.5640 | 1622.2880 |
| 1624.4624 | 1633.1435 | 1640.0968 |
| 1641.3834 | 1642.6888 | 1643.6212 |
| 1654.4663 | 1665.8579 | 1669.7766 |
| 1711.9651 | 1746.4078 | 2917.7340 |
| 3038.5315 | 3039.5666 | 3044.4993 |
| 3050.2839 | 3051.2791 | 3053.9016 |
| 3055.0913 | 3061.7971 | 3092.6481 |
| 3099.5864 | 3109.0184 | 3109.9805 |
| 3112.6412 | 3117.0122 | 3118.0161 |
| 3118.3083 | 3124.1368 | 3125.7220 |
| 3129.5712 | 3131.9476 | 3132.8677 |
| 3137.8025 | 3164.5122 | 3167.1588 |
| 3173.6952 | 3176.8538 | 3179.9398 |
| 3184.5062 | 3185.2990 | 3187.9445 |
| 3189.1243 | 3190.3195 | 3195.7407 |
| 3197.0204 | 3198.9893 | 3200.4864 |
| 3200.6856 | 3203.3949 | 3203.9325 |
| 3205.1788 | 3211.7363 | 3212.4932 |
| 3212.8721 | 3215.1542 | 3221.3024 |
| 3224.3234 | 3225.0119 | 3228.9343 |
| 3231.7327 | 3241.4985 | 3252.3654 |
| 3256.4144 | 3616.4912 | 3788.6768 |

### **TS5SR3**

Zero-point correction= 0.961497

Thermal correction to Energy= 1.019080



Thermal correction to Enthalpy= 1.020024

Thermal correction to Gibbs Free Energy= 0.870430

Sum of electronic and zero-point Energies= -2949.512755

Sum of electronic and thermal Energies= -2949.455172

Sum of electronic and thermal Enthalpies= -2949.454228

Sum of electronic and thermal Free Energies= -2949.603823

Cartesian coordinates

|   |          |           |           |
|---|----------|-----------|-----------|
| C | 2.119778 | -0.872780 | 4.017665  |
| C | 1.253964 | -1.198361 | 2.938101  |
| C | 1.849664 | -1.101125 | 1.618678  |
| C | 3.189461 | -0.672925 | 1.486937  |
| C | 3.978393 | -0.397820 | 2.603508  |
| N | 3.399725 | -0.502457 | 3.842676  |
| H | 1.744436 | -0.921041 | 5.030488  |
| C | 3.769821 | -0.431171 | 0.127932  |
| C | 4.329180 | -1.507510 | -0.627363 |
| C | 3.736031 | 0.847976  | -0.411494 |
| C | 4.354323 | -2.843978 | -0.139525 |
| C | 4.874604 | -1.238032 | -1.926640 |
| C | 4.289337 | 1.105345  | -1.691595 |
| C | 4.881860 | -3.861366 | -0.902618 |
| H | 3.948516 | -3.055397 | 0.844021  |
| C | 5.412788 | -2.311897 | -2.685845 |
| C | 4.854659 | 0.090212  | -2.424318 |
| H | 4.259970 | 2.116674  | -2.083837 |
| C | 5.414597 | -3.595214 | -2.188255 |
| H | 4.890500 | -4.876415 | -0.517890 |
| H | 5.820005 | -2.100565 | -3.670499 |
| H | 5.278208 | 0.291826  | -3.403689 |
| H | 5.824478 | -4.408569 | -2.778833 |

|   |           |           |           |
|---|-----------|-----------|-----------|
| C | 1.087828  | -1.499927 | 0.471897  |
| H | 1.536262  | -1.507630 | -0.515412 |
| O | 0.052533  | -1.548222 | 3.152465  |
| C | 5.406190  | 0.056212  | 2.512660  |
| H | 5.773161  | -0.084873 | 1.497931  |
| H | 5.486189  | 1.122604  | 2.745110  |
| H | 6.060033  | -0.502331 | 3.187014  |
| C | 3.073323  | 1.966307  | 0.349538  |
| O | 3.423450  | 2.301579  | 1.489455  |
| N | 2.060401  | 2.562528  | -0.323094 |
| H | 1.730791  | 2.091929  | -1.153123 |
| C | 1.178535  | 3.550360  | 0.305098  |
| C | 0.046465  | 2.817587  | 1.053165  |
| H | -0.547120 | 3.550283  | 1.615731  |
| H | -0.623504 | 2.308967  | 0.353426  |
| O | 0.547680  | 1.801324  | 1.920053  |
| H | 1.391227  | 2.100751  | 2.291875  |
| C | 0.723672  | 4.640675  | -0.710164 |
| C | -0.149309 | 4.058976  | -1.839386 |
| H | 0.401996  | 3.341509  | -2.456600 |
| H | -1.050192 | 3.570240  | -1.461021 |
| H | -0.472295 | 4.863933  | -2.507152 |
| C | 1.978248  | 5.293561  | -1.323807 |
| H | 1.686996  | 6.091869  | -2.014197 |
| H | 2.613843  | 5.732610  | -0.546556 |
| H | 2.578431  | 4.567594  | -1.879825 |
| C | -0.075280 | 5.724756  | 0.041006  |
| H | 0.490336  | 6.111097  | 0.896238  |
| H | -0.284239 | 6.563611  | -0.630929 |
| H | -1.035769 | 5.350969  | 0.401221  |
| N | -0.140722 | -1.945313 | 0.591472  |

|   |           |           |           |
|---|-----------|-----------|-----------|
| C | -0.956349 | -2.435637 | -0.432530 |
| C | -2.179748 | -3.075967 | 0.098755  |
| O | -2.560534 | -2.974686 | 1.257402  |
| O | -2.815862 | -3.727385 | -0.887990 |
| C | -4.103401 | -4.423037 | -0.665070 |
| C | -5.155329 | -3.450119 | -0.127918 |
| H | -4.959273 | -3.191509 | 0.912551  |
| H | -5.152952 | -2.527394 | -0.714169 |
| H | -6.141517 | -3.920608 | -0.195859 |
| C | -4.465293 | -4.890181 | -2.074826 |
| H | -3.675161 | -5.526000 | -2.484521 |
| H | -5.396686 | -5.462476 | -2.050760 |
| H | -4.601020 | -4.030730 | -2.737641 |
| C | -3.868153 | -5.611013 | 0.269233  |
| H | -4.792971 | -6.187917 | 0.365699  |
| H | -3.092389 | -6.268225 | -0.135241 |
| H | -3.564302 | -5.268743 | 1.259439  |
| P | -3.429762 | 0.463594  | -0.489280 |
| O | -4.539618 | -0.283599 | -1.209523 |
| C | -3.592613 | 2.273553  | -0.764497 |
| C | -3.812933 | 2.719221  | -2.077848 |
| C | -3.498880 | 3.220014  | 0.264492  |
| C | -3.930042 | 4.080430  | -2.357163 |
| H | -3.898045 | 1.994083  | -2.882368 |
| C | -3.623203 | 4.584078  | -0.013599 |
| H | -3.329328 | 2.894359  | 1.285618  |
| C | -3.835089 | 5.017102  | -1.323591 |
| H | -4.097065 | 4.411484  | -3.378092 |
| H | -3.555237 | 5.307003  | 0.794157  |
| H | -3.926855 | 6.077587  | -1.538708 |
| C | -3.584809 | 0.264103  | 1.321104  |

|   |           |           |           |
|---|-----------|-----------|-----------|
| C | -2.464259 | 0.281209  | 2.160473  |
| C | -4.861869 | 0.094847  | 1.877621  |
| C | -2.618038 | 0.128717  | 3.539793  |
| H | -1.471408 | 0.394537  | 1.742643  |
| C | -5.015106 | -0.052968 | 3.256285  |
| H | -5.728993 | 0.062901  | 1.224643  |
| C | -3.891266 | -0.034587 | 4.089132  |
| H | -1.734434 | 0.104800  | 4.168480  |
| H | -6.005808 | -0.188595 | 3.681123  |
| H | -4.010172 | -0.156430 | 5.162264  |
| N | -1.870322 | 0.163433  | -0.911284 |
| C | -1.549078 | -0.957635 | -1.595656 |
| C | -0.361340 | -0.843139 | -2.514620 |
| C | 0.372643  | 0.347475  | -2.558639 |
| C | -0.001430 | -1.886936 | -3.380975 |
| C | 1.455259  | 0.488764  | -3.427408 |
| H | 0.032034  | 1.154903  | -1.921367 |
| C | 1.088778  | -1.755073 | -4.240091 |
| H | -0.581613 | -2.806799 | -3.384372 |
| C | 1.828247  | -0.568260 | -4.259640 |
| H | 2.010676  | 1.421286  | -3.463542 |
| H | 1.358224  | -2.574578 | -4.899724 |
| H | 2.679806  | -0.464965 | -4.924835 |
| H | -0.427224 | -3.034798 | -1.163265 |
| C | 4.196977  | -0.182162 | 5.046950  |
| H | 5.006330  | -0.905170 | 5.154298  |
| H | 4.610538  | 0.822020  | 4.955460  |
| H | 3.549872  | -0.229940 | 5.919082  |
| H | -2.356716 | -1.552325 | -2.040277 |
| H | -0.519519 | -1.885523 | 1.564836  |
| H | 1.799774  | 4.048833  | 1.057201  |

Vibrational frequencies

|           |          |          |
|-----------|----------|----------|
| -386.0406 | 22.0756  | 25.2148  |
| 26.5473   | 33.1573  | 37.0725  |
| 40.4028   | 40.8916  | 44.4516  |
| 50.3447   | 52.4628  | 54.8750  |
| 58.0934   | 61.3308  | 64.6445  |
| 66.0983   | 71.7658  | 80.1368  |
| 83.6113   | 86.2687  | 92.1261  |
| 94.9552   | 98.3387  | 104.0392 |
| 107.9898  | 110.8063 | 121.2424 |
| 128.6572  | 138.7902 | 141.8447 |
| 145.8667  | 150.5740 | 156.2292 |
| 160.1436  | 165.5259 | 176.5884 |
| 182.3721  | 190.3960 | 195.3693 |
| 199.6876  | 211.7394 | 218.0907 |
| 228.1066  | 233.1917 | 237.0716 |
| 246.3924  | 248.5609 | 256.3250 |
| 257.2905  | 262.4535 | 268.0409 |
| 281.9992  | 290.3096 | 294.0744 |
| 296.8109  | 310.5047 | 314.7130 |
| 316.0710  | 332.5307 | 334.8106 |
| 339.6159  | 353.1517 | 357.2905 |
| 360.2258  | 362.2843 | 368.2461 |
| 370.0321  | 377.8890 | 383.9490 |
| 390.9086  | 404.7214 | 406.3777 |
| 411.0210  | 413.3326 | 420.3701 |
| 422.1968  | 425.3055 | 428.2738 |
| 440.7872  | 443.7135 | 445.6529 |
| 450.7236  | 467.1214 | 473.5426 |
| 478.1086  | 483.4303 | 486.7443 |

|           |           |           |
|-----------|-----------|-----------|
| 518.9486  | 520.8901  | 530.4039  |
| 533.0774  | 533.8973  | 541.0838  |
| 550.7434  | 555.3621  | 565.8359  |
| 571.0253  | 577.0705  | 581.4600  |
| 600.0657  | 612.3340  | 630.2836  |
| 631.0304  | 635.0550  | 637.6400  |
| 648.1385  | 663.1420  | 675.2434  |
| 698.4940  | 706.6968  | 710.5121  |
| 714.7713  | 718.3800  | 730.0573  |
| 744.0674  | 747.4470  | 754.1788  |
| 758.4416  | 764.4846  | 764.7377  |
| 766.2177  | 768.4018  | 778.7710  |
| 779.4871  | 793.6498  | 798.2730  |
| 811.8672  | 826.0651  | 850.4603  |
| 852.4733  | 859.3477  | 864.6744  |
| 867.8221  | 868.9243  | 878.3263  |
| 886.6500  | 889.1221  | 894.8768  |
| 910.1209  | 912.0057  | 923.5174  |
| 929.8331  | 935.4377  | 937.2428  |
| 938.8441  | 939.5858  | 941.6521  |
| 948.0722  | 951.7548  | 954.4039  |
| 971.0720  | 982.0916  | 984.8805  |
| 985.4263  | 986.6780  | 987.4916  |
| 991.1674  | 998.2356  | 1004.2989 |
| 1006.6491 | 1007.7843 | 1012.7813 |
| 1013.0788 | 1013.8847 | 1017.1548 |
| 1020.4164 | 1029.8773 | 1035.0576 |
| 1048.0244 | 1051.2044 | 1052.0573 |
| 1056.7647 | 1058.7232 | 1060.4241 |
| 1065.0082 | 1072.8219 | 1074.6783 |
| 1077.9266 | 1083.5034 | 1100.7555 |

|           |           |           |
|-----------|-----------|-----------|
| 1102.6370 | 1104.5964 | 1105.6196 |
| 1117.8277 | 1128.7195 | 1132.3494 |
| 1134.3046 | 1136.6340 | 1146.2767 |
| 1154.7025 | 1159.9674 | 1182.6870 |
| 1184.9937 | 1188.9773 | 1189.4836 |
| 1191.3091 | 1192.5999 | 1198.2147 |
| 1200.8610 | 1204.5191 | 1209.3359 |
| 1211.3343 | 1213.2668 | 1218.9485 |
| 1230.4024 | 1247.5075 | 1251.8680 |
| 1254.2681 | 1261.2640 | 1266.6728 |
| 1270.4753 | 1277.1574 | 1277.7172 |
| 1289.9820 | 1290.6170 | 1304.8970 |
| 1307.8499 | 1326.2999 | 1327.3556 |
| 1327.7521 | 1342.7718 | 1347.4082 |
| 1354.1338 | 1355.4346 | 1359.4201 |
| 1363.8654 | 1367.3831 | 1391.8199 |
| 1398.0013 | 1405.8091 | 1411.1005 |
| 1411.2904 | 1412.0513 | 1417.4411 |
| 1418.4673 | 1420.5437 | 1424.4672 |
| 1426.1830 | 1437.1428 | 1439.6274 |
| 1440.8913 | 1452.3130 | 1453.6538 |
| 1465.2105 | 1468.7861 | 1473.0100 |
| 1474.3373 | 1480.7133 | 1481.4230 |
| 1483.7647 | 1489.2733 | 1494.4503 |
| 1495.0577 | 1495.9426 | 1497.6635 |
| 1499.5769 | 1499.9120 | 1500.7818 |
| 1503.9705 | 1507.0803 | 1513.8290 |
| 1515.8961 | 1519.5166 | 1519.9291 |
| 1524.2402 | 1525.3459 | 1526.5857 |
| 1532.0181 | 1534.6906 | 1539.4124 |
| 1550.4226 | 1554.9614 | 1558.9116 |

|           |           |           |
|-----------|-----------|-----------|
| 1583.8102 | 1612.7899 | 1625.0486 |
| 1626.8156 | 1634.5093 | 1634.7929 |
| 1644.1717 | 1645.0114 | 1645.5580 |
| 1653.7771 | 1668.6869 | 1672.7861 |
| 1705.1876 | 1749.6574 | 3022.6511 |
| 3037.3480 | 3037.4052 | 3042.4865 |
| 3044.0417 | 3049.7215 | 3050.4072 |
| 3051.7883 | 3057.3614 | 3062.5366 |
| 3068.6995 | 3091.8868 | 3101.6688 |
| 3105.6509 | 3106.3514 | 3110.2176 |
| 3121.9512 | 3123.3590 | 3127.6946 |
| 3129.3858 | 3131.5968 | 3136.7509 |
| 3145.8403 | 3150.8621 | 3157.5230 |
| 3165.7876 | 3169.6595 | 3176.0358 |
| 3176.0924 | 3177.6143 | 3178.5314 |
| 3183.5825 | 3183.8108 | 3185.0280 |
| 3189.2213 | 3190.0949 | 3192.8306 |
| 3193.4821 | 3194.1583 | 3200.5408 |
| 3201.8597 | 3204.7736 | 3205.8730 |
| 3208.4238 | 3208.5549 | 3208.7958 |
| 3210.2399 | 3212.2561 | 3214.9645 |
| 3223.6385 | 3223.8773 | 3239.2866 |
| 3255.0348 | 3649.7522 | 3758.7341 |

### **TS5SS**

Zero-point correction= 0.960928

Thermal correction to Energy= 1.017877

Thermal correction to Enthalpy= 1.018821

Thermal correction to Gibbs Free Energy= 0.869271

Sum of electronic and zero-point Energies= -2949.534510

Sum of electronic and thermal Energies= -2949.477561



Sum of electronic and thermal Enthalpies= -2949.476616

Sum of electronic and thermal Free Energies= -2949.626166

Cartesian coordinates

|   |          |           |           |
|---|----------|-----------|-----------|
| C | 3.590652 | -3.740022 | 0.806905  |
| C | 2.253112 | -3.283073 | 0.641321  |
| C | 2.121384 | -1.853872 | 0.439638  |
| C | 3.272274 | -1.049255 | 0.297577  |
| C | 4.550748 | -1.584335 | 0.450034  |
| N | 4.658280 | -2.925996 | 0.717604  |
| H | 3.775787 | -4.787482 | 1.001003  |
| C | 3.112073 | 0.382370  | -0.111765 |
| C | 3.243299 | 0.718887  | -1.497105 |
| C | 2.729803 | 1.354842  | 0.800458  |
| C | 3.566591 | -0.246233 | -2.493332 |
| C | 3.018511 | 2.074376  | -1.906113 |
| C | 2.489598 | 2.687241  | 0.380298  |
| C | 3.664946 | 0.112755  | -3.819141 |
| H | 3.721835 | -1.279161 | -2.202598 |
| C | 3.136712 | 2.411633  | -3.281471 |
| C | 2.648349 | 3.041340  | -0.936154 |
| H | 2.169605 | 3.420085  | 1.112932  |
| C | 3.451676 | 1.454813  | -4.218991 |
| H | 3.904653 | -0.639223 | -4.564603 |
| H | 2.953927 | 3.439233  | -3.579366 |
| H | 2.449465 | 4.058486  | -1.257653 |
| H | 3.531298 | 1.723260  | -5.267854 |
| C | 0.816670 | -1.263346 | 0.408057  |
| H | 0.678893 | -0.192573 | 0.388738  |
| O | 1.272210 | -4.089444 | 0.676098  |
| C | 5.803864 | -0.763016 | 0.355362  |

|   |           |           |           |
|---|-----------|-----------|-----------|
| H | 5.543576  | 0.285669  | 0.225372  |
| H | 6.407361  | -0.844594 | 1.264381  |
| H | 6.429780  | -1.064550 | -0.491506 |
| C | 2.495375  | 0.953930  | 2.227871  |
| O | 3.360047  | 0.337081  | 2.879988  |
| N | 1.276221  | 1.269690  | 2.706154  |
| H | 0.554080  | 1.555853  | 2.032412  |
| C | 0.859836  | 0.873972  | 4.057407  |
| C | 0.328961  | -0.568721 | 4.016263  |
| O | 1.322261  | -1.510091 | 3.612293  |
| H | 2.169264  | -1.039507 | 3.517017  |
| C | -0.108640 | 1.915974  | 4.697344  |
| C | -0.183674 | 1.658765  | 6.216399  |
| H | -0.602381 | 0.675170  | 6.448489  |
| H | 0.806958  | 1.724045  | 6.680267  |
| H | -0.826140 | 2.408353  | 6.690031  |
| C | -1.525103 | 1.836993  | 4.094258  |
| H | -2.152557 | 2.628167  | 4.518970  |
| H | -1.502845 | 1.963422  | 3.009155  |
| H | -2.008185 | 0.880389  | 4.318768  |
| C | 0.458402  | 3.331894  | 4.471698  |
| H | 0.445681  | 3.608140  | 3.413925  |
| H | -0.142044 | 4.066626  | 5.018282  |
| H | 1.492316  | 3.405627  | 4.827388  |
| N | -0.268079 | -1.999617 | 0.419876  |
| C | -1.560111 | -1.497847 | 0.280101  |
| C | -2.604566 | -2.526025 | 0.366936  |
| O | -2.395547 | -3.731103 | 0.281173  |
| O | -3.810807 | -1.934405 | 0.457917  |
| C | -5.069684 | -2.704842 | 0.482732  |
| C | -5.237724 | -3.462460 | -0.835998 |

|   |           |           |           |
|---|-----------|-----------|-----------|
| H | -5.205704 | -2.764779 | -1.678419 |
| H | -4.454854 | -4.211028 | -0.960484 |
| H | -6.210286 | -3.963597 | -0.846564 |
| C | -5.082735 | -3.635642 | 1.697347  |
| H | -4.882612 | -3.065553 | 2.609482  |
| H | -6.070399 | -4.097099 | 1.789746  |
| H | -4.333069 | -4.420668 | 1.598158  |
| C | -6.124047 | -1.607356 | 0.619416  |
| H | -7.123448 | -2.051018 | 0.637959  |
| H | -5.973179 | -1.042871 | 1.543733  |
| H | -6.062745 | -0.907967 | -0.218500 |
| P | -1.297478 | 1.729515  | -0.604564 |
| O | -0.786848 | 1.723457  | 0.836493  |
| C | -3.122027 | 1.889746  | -0.567346 |
| C | -3.800138 | 1.913005  | 0.658431  |
| C | -3.858680 | 1.930185  | -1.761985 |
| C | -5.194172 | 1.984992  | 0.690927  |
| H | -3.229648 | 1.869097  | 1.579858  |
| C | -5.251415 | 1.998900  | -1.728900 |
| H | -3.342436 | 1.907174  | -2.718134 |
| C | -5.920467 | 2.027931  | -0.501129 |
| H | -5.712906 | 2.002577  | 1.644833  |
| H | -5.814631 | 2.028934  | -2.656853 |
| H | -7.004833 | 2.080355  | -0.475367 |
| C | -0.680546 | 3.189578  | -1.491540 |
| C | -0.546798 | 4.393343  | -0.783670 |
| C | -0.342466 | 3.143114  | -2.849210 |
| C | -0.082522 | 5.538936  | -1.428305 |
| H | -0.786119 | 4.420005  | 0.275258  |
| C | 0.123109  | 4.291144  | -3.493672 |
| H | -0.420374 | 2.202477  | -3.384204 |

|   |           |           |           |
|---|-----------|-----------|-----------|
| C | 0.253350  | 5.488159  | -2.785620 |
| H | 0.024778  | 6.467188  | -0.875144 |
| H | 0.393590  | 4.248178  | -4.544447 |
| H | 0.618799  | 6.379026  | -3.287797 |
| N | -0.866225 | 0.445433  | -1.529578 |
| C | -1.609024 | -0.689578 | -1.559601 |
| C | -1.081293 | -1.788496 | -2.416758 |
| C | 0.267073  | -1.794163 | -2.806075 |
| C | -1.906382 | -2.852495 | -2.809012 |
| C | 0.782143  | -2.849503 | -3.557320 |
| H | 0.894866  | -0.958668 | -2.520825 |
| C | -1.393380 | -3.904647 | -3.566871 |
| H | -2.952283 | -2.854580 | -2.519519 |
| C | -0.045081 | -3.909922 | -3.938045 |
| H | 1.828646  | -2.839510 | -3.849422 |
| H | -2.044222 | -4.720637 | -3.867244 |
| H | 0.354614  | -4.731749 | -4.525066 |
| H | -1.748443 | -0.572744 | 0.812355  |
| C | 5.998718  | -3.520063 | 0.910294  |
| H | 6.614056  | -3.332991 | 0.030286  |
| H | 6.471558  | -3.079582 | 1.788738  |
| H | 5.891021  | -4.591916 | 1.055971  |
| H | -2.703983 | -0.620704 | -1.546256 |
| H | -0.094880 | -3.026103 | 0.419768  |
| H | 1.774942  | 0.870667  | 4.660354  |
| H | -0.058177 | -0.848581 | 5.004712  |
| H | -0.507011 | -0.625454 | 3.306199  |

Vibrational frequencies

|           |         |         |
|-----------|---------|---------|
| -407.5081 | -9.1332 | 18.8807 |
| 21.9253   | 28.0908 | 29.4977 |

|          |          |          |
|----------|----------|----------|
| 32.3708  | 37.2159  | 40.0705  |
| 43.2684  | 43.9056  | 47.8571  |
| 50.8693  | 54.0287  | 55.2747  |
| 60.6542  | 64.5246  | 65.9774  |
| 70.9447  | 75.7733  | 78.2325  |
| 85.7912  | 88.2777  | 94.8308  |
| 102.7025 | 111.3015 | 116.7616 |
| 124.7142 | 131.1128 | 133.9947 |
| 139.6810 | 149.0292 | 155.0169 |
| 160.0713 | 162.5484 | 180.8095 |
| 184.5565 | 195.2674 | 198.8091 |
| 203.8792 | 220.2698 | 225.5876 |
| 230.0791 | 236.6495 | 241.0790 |
| 246.2390 | 246.5153 | 253.5301 |
| 259.4892 | 269.8359 | 271.7955 |
| 277.0793 | 282.7436 | 288.3083 |
| 298.8299 | 304.2002 | 307.7404 |
| 313.5361 | 323.6362 | 332.1899 |
| 335.9574 | 342.9637 | 351.4903 |
| 362.4628 | 363.5322 | 373.7413 |
| 375.4667 | 387.3986 | 394.8875 |
| 404.1936 | 405.8967 | 407.5488 |
| 410.0661 | 412.4384 | 416.7550 |
| 426.7369 | 432.6307 | 438.0349 |
| 441.5285 | 443.1571 | 458.6979 |
| 460.6136 | 464.9320 | 473.2570 |
| 479.8719 | 483.4085 | 486.0507 |
| 498.4708 | 520.6191 | 528.5888 |
| 534.1802 | 536.5551 | 549.8023 |
| 550.6989 | 554.4368 | 573.5068 |
| 579.1386 | 580.8599 | 593.4646 |

|           |           |           |
|-----------|-----------|-----------|
| 609.0823  | 630.0607  | 630.3174  |
| 633.4951  | 641.0186  | 649.4696  |
| 664.9673  | 670.3055  | 695.0697  |
| 703.8719  | 707.8895  | 710.4209  |
| 717.1628  | 733.4897  | 744.9489  |
| 750.4136  | 753.3900  | 762.1784  |
| 763.1120  | 764.9103  | 768.7090  |
| 770.0677  | 776.2332  | 782.0236  |
| 796.1903  | 797.7895  | 811.6146  |
| 818.3079  | 836.0471  | 845.6428  |
| 847.2353  | 852.8563  | 866.9697  |
| 867.9711  | 871.2268  | 871.9457  |
| 884.4070  | 888.3737  | 891.7829  |
| 896.9336  | 913.1463  | 920.7221  |
| 935.2358  | 936.1009  | 939.3981  |
| 939.8986  | 944.0116  | 946.2545  |
| 950.5275  | 951.7955  | 956.4110  |
| 970.4348  | 982.0234  | 983.6209  |
| 985.6755  | 986.8482  | 988.7277  |
| 989.4273  | 990.8489  | 1003.0407 |
| 1007.0719 | 1009.7124 | 1010.2934 |
| 1013.1659 | 1014.0669 | 1015.7713 |
| 1022.1382 | 1024.1511 | 1032.9582 |
| 1042.9592 | 1048.9988 | 1050.3628 |
| 1051.8533 | 1053.1624 | 1056.3842 |
| 1060.4783 | 1064.6362 | 1072.4904 |
| 1080.6996 | 1085.6213 | 1092.0810 |
| 1103.0943 | 1108.2436 | 1110.7943 |
| 1112.7125 | 1125.4491 | 1130.6431 |
| 1131.2503 | 1134.5660 | 1146.5353 |
| 1147.3017 | 1156.2151 | 1183.3452 |

|           |           |           |
|-----------|-----------|-----------|
| 1185.0192 | 1188.0208 | 1190.9184 |
| 1191.1897 | 1192.0469 | 1203.4470 |
| 1204.1431 | 1206.0187 | 1207.5878 |
| 1213.1777 | 1224.8292 | 1231.0452 |
| 1235.7009 | 1247.1251 | 1251.3762 |
| 1256.5897 | 1265.6955 | 1268.2037 |
| 1275.0061 | 1276.7541 | 1289.9739 |
| 1293.4371 | 1296.6317 | 1312.9195 |
| 1325.3506 | 1325.9497 | 1329.6454 |
| 1330.6897 | 1339.9318 | 1343.6167 |
| 1355.6251 | 1356.8777 | 1357.2589 |
| 1362.8271 | 1366.9482 | 1395.8351 |
| 1402.8128 | 1408.3256 | 1409.3197 |
| 1413.4910 | 1416.5028 | 1418.0700 |
| 1422.3989 | 1423.9691 | 1429.5398 |
| 1433.4406 | 1438.5030 | 1441.5764 |
| 1441.6899 | 1449.7331 | 1462.0536 |
| 1468.0437 | 1473.9741 | 1474.6633 |
| 1476.3689 | 1480.1898 | 1481.0320 |
| 1488.3993 | 1490.5586 | 1495.1575 |
| 1495.7303 | 1497.0852 | 1497.5839 |
| 1500.7895 | 1501.8005 | 1502.1567 |
| 1503.5620 | 1508.7038 | 1510.0358 |
| 1512.6409 | 1519.3329 | 1522.0436 |
| 1522.5247 | 1522.6408 | 1528.3202 |
| 1531.3942 | 1532.8285 | 1533.4326 |
| 1550.4992 | 1555.4013 | 1582.8503 |
| 1605.5416 | 1618.4076 | 1625.3699 |
| 1626.7989 | 1634.3615 | 1638.1638 |
| 1643.7781 | 1645.6637 | 1648.0993 |
| 1655.6883 | 1671.9525 | 1673.2480 |

|           |           |           |
|-----------|-----------|-----------|
| 1684.6998 | 1737.4556 | 3016.6840 |
| 3036.0469 | 3036.8632 | 3036.9788 |
| 3043.2959 | 3049.9043 | 3051.8921 |
| 3052.0013 | 3053.3570 | 3059.9948 |
| 3067.7190 | 3091.7566 | 3103.9132 |
| 3104.8146 | 3109.2097 | 3109.8400 |
| 3119.1111 | 3122.3556 | 3123.0218 |
| 3125.0097 | 3127.8408 | 3134.6391 |
| 3137.5549 | 3139.2738 | 3161.9673 |
| 3166.9764 | 3175.2346 | 3177.6168 |
| 3177.8640 | 3178.1587 | 3182.1443 |
| 3185.6368 | 3187.2093 | 3187.7922 |
| 3189.4955 | 3195.6801 | 3196.7569 |
| 3197.8771 | 3199.7085 | 3199.9888 |
| 3203.3412 | 3204.1589 | 3206.2479 |
| 3206.9951 | 3208.6471 | 3210.8840 |
| 3212.2101 | 3215.0395 | 3217.0327 |
| 3217.0579 | 3229.2788 | 3254.4983 |
| 3269.9633 | 3309.0864 | 3649.9096 |

### **TS5SS1**

Zero-point correction= 0.960940

Thermal correction to Energy= 1.018838

Thermal correction to Enthalpy= 1.019782

Thermal correction to Gibbs Free Energy= 0.867691

Sum of electronic and zero-point Energies= -2949.517125

Sum of electronic and thermal Energies= -2949.459226

Sum of electronic and thermal Enthalpies= -2949.458282

Sum of electronic and thermal Free Energies= -2949.610374

Cartesian coordinates



|   |           |           |           |
|---|-----------|-----------|-----------|
| C | -3.338598 | -1.317162 | -3.510875 |
| C | -2.164374 | -0.747828 | -2.937018 |
| C | -2.139933 | -0.752171 | -1.489245 |
| C | -3.224646 | -1.281202 | -0.750408 |
| C | -4.341659 | -1.805595 | -1.396796 |
| N | -4.347482 | -1.807838 | -2.772869 |
| H | -3.437638 | -1.360116 | -4.586775 |
| C | -3.156948 | -1.282225 | 0.748590  |
| C | -2.837105 | -2.494028 | 1.441072  |
| C | -3.294199 | -0.099263 | 1.466298  |
| C | -2.640108 | -3.730107 | 0.764599  |
| C | -2.698593 | -2.467067 | 2.869596  |
| C | -3.147079 | -0.082277 | 2.877048  |
| C | -2.337935 | -4.877171 | 1.463603  |
| H | -2.720817 | -3.762406 | -0.315618 |
| C | -2.383772 | -3.669165 | 3.559114  |
| C | -2.867112 | -1.239618 | 3.562097  |
| H | -3.271512 | 0.855337  | 3.408829  |
| C | -2.208960 | -4.849447 | 2.873791  |
| H | -2.192413 | -5.810700 | 0.929032  |
| H | -2.281838 | -3.637206 | 4.639972  |
| H | -2.764543 | -1.225394 | 4.643000  |
| H | -1.968446 | -5.761906 | 3.410060  |
| C | -1.065576 | -0.111096 | -0.809803 |
| H | -1.078948 | -0.045069 | 0.267401  |
| O | -1.229773 | -0.294139 | -3.660568 |
| C | -5.543831 | -2.339418 | -0.671932 |
| H | -5.423504 | -2.190928 | 0.399381  |
| H | -6.459528 | -1.824289 | -0.977334 |
| H | -5.686544 | -3.410797 | -0.847869 |
| C | -3.550394 | 1.187813  | 0.733495  |

|   |           |          |           |
|---|-----------|----------|-----------|
| O | -4.520186 | 1.327975 | -0.025466 |
| N | -2.619152 | 2.150760 | 0.936105  |
| H | -1.838536 | 1.942740 | 1.545679  |
| C | -2.720233 | 3.493177 | 0.343509  |
| C | -2.237827 | 3.485938 | -1.123896 |
| O | -2.756458 | 2.404043 | -1.884783 |
| H | -3.619390 | 2.156418 | -1.509194 |
| C | -2.021843 | 4.553413 | 1.249449  |
| C | -2.257938 | 5.956873 | 0.655053  |
| H | -1.739049 | 6.093916 | -0.297658 |
| H | -3.324945 | 6.146538 | 0.495172  |
| H | -1.880794 | 6.718250 | 1.345004  |
| C | -0.503713 | 4.308024 | 1.372092  |
| H | -0.062811 | 5.059925 | 2.033844  |
| H | -0.266306 | 3.336486 | 1.815131  |
| H | 0.013011  | 4.378107 | 0.410409  |
| C | -2.656357 | 4.505771 | 2.655062  |
| H | -2.470440 | 3.553859 | 3.161165  |
| H | -2.235426 | 5.297725 | 3.282465  |
| H | -3.740295 | 4.654067 | 2.602219  |
| N | -0.084445 | 0.507382 | -1.413813 |
| C | 0.849630  | 1.298096 | -0.720285 |
| C | 1.808375  | 1.951431 | -1.627928 |
| O | 2.066180  | 1.533542 | -2.747963 |
| O | 2.359479  | 3.009605 | -1.019122 |
| C | 3.488629  | 3.756952 | -1.611123 |
| C | 4.693369  | 2.825390 | -1.741738 |
| H | 4.955412  | 2.415732 | -0.763665 |
| H | 4.479755  | 1.986244 | -2.403138 |
| H | 5.546764  | 3.390436 | -2.130051 |
| C | 3.063578  | 4.371094 | -2.947053 |

|   |           |           |           |
|---|-----------|-----------|-----------|
| H | 2.140219  | 4.944827  | -2.820342 |
| H | 3.845623  | 5.051952  | -3.296607 |
| H | 2.900596  | 3.601034  | -3.700422 |
| C | 3.741877  | 4.845846  | -0.568831 |
| H | 4.583733  | 5.471032  | -0.879186 |
| H | 2.858969  | 5.481332  | -0.453173 |
| H | 3.977806  | 4.399090  | 0.401007  |
| P | 3.732954  | -1.128891 | -0.748752 |
| O | 4.562467  | -0.702985 | -1.941422 |
| C | 2.328032  | -2.189891 | -1.275334 |
| C | 1.773219  | -1.982745 | -2.545861 |
| C | 1.708022  | -3.097750 | -0.401150 |
| C | 0.623617  | -2.670694 | -2.938084 |
| H | 2.234681  | -1.261579 | -3.212402 |
| C | 0.555545  | -3.781665 | -0.790085 |
| H | 2.124915  | -3.269119 | 0.587248  |
| C | 0.009841  | -3.565259 | -2.058498 |
| H | 0.187114  | -2.477565 | -3.911392 |
| H | 0.075510  | -4.469054 | -0.101141 |
| H | -0.893862 | -4.088413 | -2.358066 |
| C | 4.735083  | -2.203672 | 0.349023  |
| C | 5.747774  | -2.997076 | -0.210012 |
| C | 4.494139  | -2.276797 | 1.728614  |
| C | 6.499824  | -3.855477 | 0.593520  |
| H | 5.948790  | -2.928213 | -1.274893 |
| C | 5.243440  | -3.138052 | 2.533203  |
| H | 3.726949  | -1.645322 | 2.166659  |
| C | 6.245772  | -3.929409 | 1.966206  |
| H | 7.284016  | -4.463932 | 0.152075  |
| H | 5.049889  | -3.187583 | 3.600998  |
| H | 6.830321  | -4.597657 | 2.592011  |

|   |           |           |           |
|---|-----------|-----------|-----------|
| N | 3.161440  | 0.050030  | 0.247586  |
| C | 1.848638  | 0.211190  | 0.537571  |
| C | 1.545740  | 0.937734  | 1.821468  |
| C | 2.345861  | 1.997526  | 2.266300  |
| C | 0.425980  | 0.569344  | 2.583208  |
| C | 2.027115  | 2.680486  | 3.440120  |
| H | 3.212378  | 2.276211  | 1.678024  |
| C | 0.105540  | 1.252626  | 3.759993  |
| H | -0.183557 | -0.278062 | 2.278152  |
| C | 0.904396  | 2.314893  | 4.189673  |
| H | 2.652689  | 3.505095  | 3.769429  |
| H | -0.758737 | 0.944420  | 4.340016  |
| H | 0.656351  | 2.850756  | 5.100666  |
| H | 0.371222  | 1.974959  | -0.023455 |
| C | -5.515626 | -2.368793 | -3.487582 |
| H | -5.667742 | -3.404437 | -3.183809 |
| H | -6.404520 | -1.782246 | -3.253702 |
| H | -5.325911 | -2.328382 | -4.557102 |
| H | 1.176631  | -0.652174 | 0.411564  |
| H | -0.051856 | 0.394230  | -2.442595 |
| H | -3.792129 | 3.724791  | 0.328979  |
| H | -2.516920 | 4.447711  | -1.575920 |
| H | -1.146939 | 3.407053  | -1.172243 |

Vibrational frequencies

|           |         |         |
|-----------|---------|---------|
| -352.3520 | 15.8436 | 19.8400 |
| 26.6570   | 28.5740 | 32.4750 |
| 34.3615   | 36.0726 | 38.3399 |
| 42.5261   | 44.7000 | 47.6934 |
| 51.0474   | 58.0909 | 61.3199 |
| 63.7700   | 66.2063 | 74.5463 |

|          |          |          |
|----------|----------|----------|
| 77.0663  | 82.6299  | 86.0821  |
| 90.6020  | 92.5709  | 97.8081  |
| 112.7028 | 113.5087 | 115.7808 |
| 127.3239 | 132.2310 | 141.1949 |
| 144.9688 | 150.7792 | 153.5282 |
| 159.3741 | 171.0563 | 175.8132 |
| 185.5485 | 191.6770 | 198.7507 |
| 204.5019 | 215.7584 | 221.0593 |
| 224.8280 | 231.1450 | 238.5589 |
| 248.5986 | 253.1114 | 264.0695 |
| 266.0777 | 269.5614 | 277.5962 |
| 281.9418 | 284.5729 | 288.1990 |
| 292.4277 | 298.1838 | 307.1293 |
| 310.9321 | 319.1030 | 328.9390 |
| 337.8198 | 341.9984 | 346.8464 |
| 362.7529 | 369.7969 | 371.7727 |
| 382.2930 | 385.1296 | 385.7816 |
| 390.6523 | 392.6679 | 402.3009 |
| 403.3531 | 410.5923 | 412.3526 |
| 418.9427 | 420.0767 | 422.2815 |
| 438.0329 | 444.0796 | 449.9410 |
| 453.0785 | 461.6078 | 472.2838 |
| 484.4007 | 486.8704 | 496.5470 |
| 515.0130 | 518.9396 | 520.7371 |
| 535.7375 | 537.7707 | 543.4405 |
| 548.7387 | 552.5863 | 561.3971 |
| 569.3840 | 576.0486 | 582.2722 |
| 594.5259 | 612.8239 | 629.3503 |
| 631.6410 | 632.0007 | 638.1905 |
| 648.0127 | 663.9561 | 675.2525 |
| 694.0807 | 699.9669 | 712.3350 |

|           |           |           |
|-----------|-----------|-----------|
| 714.7708  | 716.2184  | 725.2621  |
| 734.3671  | 742.4835  | 754.2367  |
| 761.0077  | 766.2354  | 768.5356  |
| 770.4298  | 775.5363  | 778.3271  |
| 781.7893  | 795.4576  | 796.9206  |
| 809.6242  | 817.4122  | 840.2235  |
| 843.9418  | 853.2289  | 864.7560  |
| 869.6462  | 874.9053  | 877.5646  |
| 884.2357  | 888.2522  | 890.6597  |
| 891.3396  | 901.7539  | 908.4037  |
| 928.1223  | 931.9881  | 937.1981  |
| 937.8940  | 938.6366  | 947.6281  |
| 949.6585  | 950.1513  | 952.7206  |
| 968.2424  | 972.6136  | 974.9939  |
| 981.5239  | 982.2357  | 992.9127  |
| 994.9673  | 996.8419  | 1001.2055 |
| 1006.4118 | 1012.0803 | 1013.4243 |
| 1014.2414 | 1014.5852 | 1016.3699 |
| 1022.8675 | 1031.7767 | 1042.5313 |
| 1050.7704 | 1051.4708 | 1052.3867 |
| 1052.8425 | 1056.5590 | 1060.0559 |
| 1065.1276 | 1067.3877 | 1070.8774 |
| 1076.0666 | 1081.5635 | 1096.0376 |
| 1104.1449 | 1107.2054 | 1108.6045 |
| 1110.5195 | 1119.6577 | 1129.8418 |
| 1130.9266 | 1134.4007 | 1146.5572 |
| 1154.9910 | 1180.1243 | 1183.8295 |
| 1186.1925 | 1188.6235 | 1190.3818 |
| 1192.8239 | 1192.9465 | 1195.7445 |
| 1202.8560 | 1204.5031 | 1213.4023 |
| 1215.5357 | 1217.2930 | 1232.3590 |

|           |           |           |
|-----------|-----------|-----------|
| 1242.7340 | 1246.9390 | 1248.4421 |
| 1251.7818 | 1259.0112 | 1264.4597 |
| 1271.4269 | 1277.0972 | 1278.7832 |
| 1288.7581 | 1290.8904 | 1309.9724 |
| 1318.0310 | 1323.4401 | 1329.3193 |
| 1331.1010 | 1344.9064 | 1354.3178 |
| 1358.1523 | 1359.9297 | 1361.5106 |
| 1362.1873 | 1365.8759 | 1384.2948 |
| 1399.9806 | 1405.4131 | 1409.2446 |
| 1410.3208 | 1411.9612 | 1414.5347 |
| 1417.4002 | 1419.4903 | 1431.8384 |
| 1433.2958 | 1434.6247 | 1435.5485 |
| 1439.8282 | 1448.1507 | 1457.7092 |
| 1466.1800 | 1467.5009 | 1471.0794 |
| 1474.5552 | 1479.8515 | 1480.1427 |
| 1487.6372 | 1489.2668 | 1492.0039 |
| 1494.9674 | 1495.6637 | 1496.6022 |
| 1501.7194 | 1501.9046 | 1503.4401 |
| 1507.3776 | 1511.5089 | 1512.1677 |
| 1513.1180 | 1514.1451 | 1518.7880 |
| 1520.7900 | 1522.4758 | 1525.0456 |
| 1529.6592 | 1532.7860 | 1533.9755 |
| 1550.2471 | 1554.7598 | 1563.6727 |
| 1577.2267 | 1612.9738 | 1621.9555 |
| 1624.9277 | 1626.6237 | 1635.3029 |
| 1641.2202 | 1644.7204 | 1645.4817 |
| 1655.3400 | 1672.3990 | 1675.4539 |
| 1729.6902 | 1742.3120 | 3013.2313 |
| 3035.5573 | 3035.6606 | 3040.1897 |
| 3045.9659 | 3049.5608 | 3050.6787 |
| 3053.1329 | 3053.9450 | 3059.6233 |

|           |           |           |
|-----------|-----------|-----------|
| 3062.8826 | 3091.1137 | 3105.1514 |
| 3106.6027 | 3110.9522 | 3115.4716 |
| 3115.6849 | 3116.5006 | 3117.5966 |
| 3122.3340 | 3126.9652 | 3129.0898 |
| 3129.2256 | 3136.4900 | 3163.4348 |
| 3166.6736 | 3175.5935 | 3178.1446 |
| 3179.0310 | 3181.1883 | 3183.4662 |
| 3185.8758 | 3185.9139 | 3187.6859 |
| 3190.2022 | 3191.3665 | 3194.8516 |
| 3195.5063 | 3195.7747 | 3199.0024 |
| 3202.6169 | 3203.2579 | 3205.0894 |
| 3208.3761 | 3208.6588 | 3210.3258 |
| 3210.5851 | 3216.4550 | 3217.6829 |
| 3218.0790 | 3249.2093 | 3254.0932 |
| 3256.2011 | 3600.2446 | 3810.3810 |

## TS5SS2

Zero-point correction= 0.961352

Thermal correction to Energy= 1.019168

Thermal correction to Enthalpy= 1.020112

Thermal correction to Gibbs Free Energy= 0.865689

Sum of electronic and zero-point Energies= -2949.503794

Sum of electronic and thermal Energies= -2949.445978

Sum of electronic and thermal Enthalpies= -2949.445034

Sum of electronic and thermal Free Energies= -2949.599457

## Cartesian coordinates

|   |           |           |           |
|---|-----------|-----------|-----------|
| C | -1.779886 | -2.828493 | -3.287496 |
| C | -1.047583 | -1.879418 | -2.518217 |
| C | -1.578824 | -1.631649 | -1.193335 |
| C | -2.787383 | -2.244520 | -0.782046 |



|   |           |           |           |
|---|-----------|-----------|-----------|
| C | -3.463285 | -3.129613 | -1.619786 |
| N | -2.911387 | -3.403376 | -2.849895 |
| H | -1.429703 | -3.095749 | -4.274981 |
| C | -3.360356 | -1.907599 | 0.560641  |
| C | -3.259381 | -2.849113 | 1.634271  |
| C | -3.919494 | -0.654981 | 0.790299  |
| C | -2.640848 | -4.121635 | 1.478984  |
| C | -3.791180 | -2.500513 | 2.920591  |
| C | -4.425352 | -0.317029 | 2.072729  |
| C | -2.572293 | -5.006359 | 2.531461  |
| H | -2.214667 | -4.390355 | 0.518919  |
| C | -3.707149 | -3.439444 | 3.984123  |
| C | -4.376723 | -1.221595 | 3.105370  |
| H | -4.871201 | 0.660931  | 2.223292  |
| C | -3.113839 | -4.666570 | 3.795564  |
| H | -2.096439 | -5.972247 | 2.393594  |
| H | -4.117010 | -3.166529 | 4.952364  |
| H | -4.781210 | -0.963266 | 4.079626  |
| H | -3.053173 | -5.375650 | 4.615210  |
| C | -0.934829 | -0.680034 | -0.348754 |
| H | -1.321046 | -0.487402 | 0.644467  |
| O | -0.015320 | -1.310143 | -2.986713 |
| C | -4.776462 | -3.768957 | -1.269116 |
| H | -5.127696 | -3.391980 | -0.310963 |
| H | -5.543694 | -3.543284 | -2.015987 |
| H | -4.694443 | -4.858123 | -1.190573 |
| C | -3.986980 | 0.364907  | -0.320647 |
| O | -4.453341 | 0.097043  | -1.430101 |
| N | -3.478766 | 1.580748  | 0.012302  |
| H | -3.042301 | 1.704206  | 0.915429  |
| C | -3.424553 | 2.726915  | -0.894539 |

|   |           |          |           |
|---|-----------|----------|-----------|
| C | -1.973489 | 3.221367 | -0.950464 |
| H | -1.369183 | 2.422052 | -1.400670 |
| H | -1.899581 | 4.096532 | -1.606907 |
| O | -1.509679 | 3.519616 | 0.366973  |
| H | -0.547520 | 3.647421 | 0.317440  |
| C | -4.522562 | 3.789095 | -0.556345 |
| C | -4.414004 | 4.299275 | 0.892899  |
| H | -4.534341 | 3.482311 | 1.612353  |
| H | -3.448394 | 4.773650 | 1.077353  |
| H | -5.207480 | 5.028536 | 1.089767  |
| C | -5.903529 | 3.132501 | -0.755564 |
| H | -6.698635 | 3.853231 | -0.537714 |
| H | -6.033617 | 2.782049 | -1.784819 |
| H | -6.037473 | 2.275286 | -0.089603 |
| C | -4.397869 | 4.978859 | -1.527198 |
| H | -4.379726 | 4.643195 | -2.570594 |
| H | -5.253993 | 5.650908 | -1.407500 |
| H | -3.493350 | 5.565616 | -1.341112 |
| N | 0.070970  | 0.060629 | -0.745219 |
| C | 0.616275  | 1.097446 | 0.025176  |
| C | 1.376692  | 2.050635 | -0.799681 |
| O | 1.964208  | 1.748032 | -1.824536 |
| O | 1.353193  | 3.278093 | -0.230295 |
| C | 2.133198  | 4.417442 | -0.774848 |
| C | 3.623622  | 4.074312 | -0.763333 |
| H | 3.943432  | 3.818779 | 0.249442  |
| H | 3.842727  | 3.238003 | -1.427291 |
| H | 4.192392  | 4.947701 | -1.096033 |
| C | 1.618697  | 4.759440 | -2.173952 |
| H | 0.538765  | 4.934675 | -2.149947 |
| H | 2.105704  | 5.674334 | -2.523952 |

|   |          |           |           |
|---|----------|-----------|-----------|
| H | 1.831432 | 3.953905  | -2.876610 |
| C | 1.817045 | 5.532051  | 0.221658  |
| H | 2.351666 | 6.443388  | -0.059615 |
| H | 0.744461 | 5.750687  | 0.229282  |
| H | 2.122019 | 5.239460  | 1.230166  |
| P | 3.203831 | -1.435314 | 0.069207  |
| O | 2.037303 | -2.406432 | 0.025851  |
| C | 4.678700 | -2.189371 | 0.861244  |
| C | 5.388435 | -3.203085 | 0.198209  |
| C | 5.065296 | -1.825077 | 2.158134  |
| C | 6.461151 | -3.841447 | 0.821010  |
| H | 5.107142 | -3.485908 | -0.812903 |
| C | 6.138044 | -2.464431 | 2.783628  |
| H | 4.525419 | -1.030591 | 2.664106  |
| C | 6.837204 | -3.473044 | 2.116421  |
| H | 7.005949 | -4.621752 | 0.297304  |
| H | 6.431403 | -2.172216 | 3.787995  |
| H | 7.674390 | -3.967534 | 2.600617  |
| C | 3.793205 | -1.046236 | -1.620115 |
| C | 3.117225 | -1.570401 | -2.725619 |
| C | 4.896279 | -0.202474 | -1.822215 |
| C | 3.532789 | -1.250199 | -4.021208 |
| H | 2.244412 | -2.193595 | -2.569809 |
| C | 5.315070 | 0.112340  | -3.113746 |
| H | 5.422433 | 0.211456  | -0.966637 |
| C | 4.631559 | -0.412096 | -4.217166 |
| H | 2.994233 | -1.651997 | -4.874975 |
| H | 6.169734 | 0.766088  | -3.263461 |
| H | 4.955397 | -0.164001 | -5.224064 |
| N | 3.020592 | 0.003859  | 0.835779  |
| C | 1.820348 | 0.375741  | 1.335239  |

|   |           |           |           |
|---|-----------|-----------|-----------|
| C | 1.843607  | 1.488468  | 2.350827  |
| C | 2.978724  | 2.293158  | 2.503003  |
| C | 0.719896  | 1.748643  | 3.148361  |
| C | 2.984175  | 3.350806  | 3.413035  |
| H | 3.850967  | 2.067952  | 1.899897  |
| C | 0.721786  | 2.803708  | 4.060829  |
| H | -0.164120 | 1.121397  | 3.055350  |
| C | 1.852941  | 3.614853  | 4.190719  |
| H | 3.871752  | 3.968573  | 3.516832  |
| H | -0.156829 | 2.991705  | 4.671041  |
| H | 1.855215  | 4.439126  | 4.897830  |
| H | -0.127812 | 1.553032  | 0.667896  |
| C | -3.593160 | -4.358777 | -3.751217 |
| H | -3.703257 | -5.319934 | -3.249143 |
| H | -4.575240 | -3.970116 | -4.022288 |
| H | -2.993069 | -4.484813 | -4.648749 |
| H | 1.099070  | -0.415697 | 1.599134  |
| H | 0.446540  | -0.177342 | -1.684915 |
| H | -3.654388 | 2.334094  | -1.890111 |

#### Vibrational frequencies

|           |          |          |
|-----------|----------|----------|
| -357.1280 | 11.2775  | 15.0664  |
| 18.6048   | 26.4115  | 30.1181  |
| 30.7387   | 33.6867  | 34.5822  |
| 36.3040   | 38.4859  | 45.3959  |
| 46.7754   | 53.8412  | 54.7537  |
| 58.4380   | 62.5000  | 64.5629  |
| 70.3186   | 70.5391  | 76.4510  |
| 78.4398   | 88.0254  | 97.5269  |
| 100.0026  | 107.6414 | 112.0930 |
| 125.0069  | 127.3553 | 137.4347 |

|          |          |          |
|----------|----------|----------|
| 147.5462 | 152.7448 | 158.6277 |
| 169.3394 | 177.3855 | 186.9801 |
| 190.3909 | 191.4359 | 196.7163 |
| 204.2742 | 217.1213 | 223.4110 |
| 235.2296 | 237.8463 | 249.2253 |
| 249.7646 | 254.7180 | 261.6415 |
| 263.3033 | 267.4769 | 273.4125 |
| 279.6405 | 286.9196 | 293.4997 |
| 300.9629 | 301.5148 | 303.1110 |
| 314.6254 | 320.8303 | 330.1007 |
| 337.8501 | 338.9260 | 344.4706 |
| 358.0493 | 367.5557 | 369.7151 |
| 385.6731 | 393.9959 | 396.6361 |
| 400.2217 | 403.5733 | 407.7945 |
| 410.6518 | 413.4893 | 416.6271 |
| 423.3641 | 425.9447 | 436.5401 |
| 439.8932 | 445.9130 | 455.0443 |
| 461.8071 | 478.0159 | 478.7120 |
| 484.2637 | 485.7809 | 510.6708 |
| 521.5647 | 524.2584 | 536.3261 |
| 542.6285 | 547.0641 | 548.9969 |
| 566.0855 | 570.3231 | 575.9043 |
| 591.0216 | 609.5500 | 618.3581 |
| 630.7423 | 631.5620 | 632.6842 |
| 633.3875 | 636.9567 | 645.5517 |
| 662.2010 | 670.5983 | 676.3950 |
| 700.2956 | 706.2085 | 713.2719 |
| 714.8075 | 716.2976 | 727.2626 |
| 735.7479 | 741.8841 | 755.3181 |
| 758.0153 | 760.8625 | 762.1873 |
| 766.2715 | 767.0909 | 777.4333 |

|           |           |           |
|-----------|-----------|-----------|
| 786.8821  | 795.2976  | 797.6919  |
| 813.2222  | 820.6264  | 853.1665  |
| 855.2405  | 857.0464  | 860.0583  |
| 868.1545  | 870.2254  | 873.3911  |
| 873.7601  | 887.2951  | 889.7114  |
| 892.1927  | 904.1157  | 911.9077  |
| 936.0956  | 939.7656  | 941.5745  |
| 942.6022  | 943.0694  | 945.9207  |
| 948.3090  | 952.2072  | 962.1307  |
| 969.4618  | 973.8113  | 977.0736  |
| 982.2898  | 988.5546  | 989.3495  |
| 990.1350  | 991.9773  | 1006.7050 |
| 1007.2357 | 1007.6770 | 1008.3873 |
| 1011.0181 | 1012.8610 | 1014.7037 |
| 1014.8718 | 1030.1078 | 1042.9270 |
| 1048.4273 | 1050.0291 | 1050.9010 |
| 1051.5809 | 1055.9447 | 1059.6049 |
| 1063.7574 | 1064.1403 | 1077.2778 |
| 1079.7176 | 1080.1703 | 1104.2437 |
| 1105.0899 | 1106.6495 | 1113.1198 |
| 1119.1847 | 1130.3430 | 1133.1202 |
| 1136.6254 | 1146.7726 | 1153.1978 |
| 1156.5374 | 1165.4498 | 1183.1274 |
| 1186.7641 | 1189.2594 | 1189.5577 |
| 1190.6348 | 1194.6893 | 1200.5947 |
| 1202.8393 | 1208.2242 | 1209.2211 |
| 1212.1694 | 1215.7528 | 1220.5589 |
| 1224.3586 | 1245.6020 | 1249.3154 |
| 1253.7301 | 1258.6432 | 1261.1690 |
| 1266.5510 | 1270.5224 | 1280.2585 |
| 1290.1498 | 1294.8074 | 1305.5479 |

|           |           |           |
|-----------|-----------|-----------|
| 1313.2320 | 1316.3515 | 1326.0617 |
| 1327.0359 | 1332.9465 | 1343.9791 |
| 1356.2196 | 1358.1244 | 1360.2018 |
| 1361.6039 | 1365.0549 | 1374.2116 |
| 1387.4613 | 1402.4135 | 1407.8299 |
| 1410.3998 | 1411.3504 | 1415.7326 |
| 1416.5603 | 1417.3696 | 1427.0807 |
| 1431.6163 | 1438.8202 | 1439.6680 |
| 1440.6149 | 1446.9093 | 1464.9779 |
| 1467.6205 | 1470.5274 | 1473.8039 |
| 1475.2743 | 1480.8558 | 1482.9270 |
| 1487.3893 | 1490.1661 | 1491.7553 |
| 1495.8248 | 1496.6947 | 1497.1433 |
| 1498.0838 | 1499.1654 | 1499.6734 |
| 1504.9544 | 1505.6379 | 1511.6761 |
| 1513.6517 | 1516.5651 | 1519.7506 |
| 1523.3643 | 1525.6096 | 1528.6516 |
| 1533.4352 | 1533.7506 | 1539.2106 |
| 1542.4304 | 1544.8884 | 1553.8768 |
| 1583.5939 | 1610.5856 | 1625.4306 |
| 1628.5837 | 1635.4912 | 1636.9454 |
| 1644.5124 | 1644.7926 | 1646.0008 |
| 1653.9362 | 1670.4820 | 1672.5496 |
| 1728.2695 | 1767.2729 | 2955.0150 |
| 3025.8363 | 3033.8793 | 3039.0277 |
| 3045.3153 | 3048.3829 | 3054.0016 |
| 3056.4719 | 3065.5089 | 3067.8468 |
| 3086.1020 | 3092.6619 | 3102.4449 |
| 3103.2788 | 3111.2319 | 3111.6955 |
| 3115.3473 | 3122.2593 | 3122.7670 |
| 3127.5444 | 3137.1287 | 3141.7640 |

|           |           |           |
|-----------|-----------|-----------|
| 3146.4832 | 3164.4384 | 3166.2080 |
| 3166.2897 | 3169.0803 | 3174.5088 |
| 3174.9653 | 3177.3256 | 3180.3662 |
| 3181.1559 | 3182.1248 | 3182.7547 |
| 3185.9286 | 3190.0401 | 3190.5325 |
| 3190.7473 | 3191.9906 | 3195.2038 |
| 3199.7931 | 3202.5415 | 3203.4152 |
| 3204.4399 | 3204.7938 | 3206.5393 |
| 3207.1772 | 3208.4622 | 3217.5399 |
| 3217.8917 | 3230.3522 | 3230.7513 |
| 3254.3297 | 3629.1841 | 3710.0284 |

### TS5SS3

Zero-point correction= 0.962001

Thermal correction to Energy= 1.019435

Thermal correction to Enthalpy= 1.020379

Thermal correction to Gibbs Free Energy= 0.869135

Sum of electronic and zero-point Energies= -2949.499615

Sum of electronic and thermal Energies= -2949.442181

Sum of electronic and thermal Enthalpies= -2949.441237

Sum of electronic and thermal Free Energies= -2949.592481

### Cartesian coordinates

|   |          |           |           |
|---|----------|-----------|-----------|
| C | 4.446793 | 0.255041  | 3.489597  |
| C | 3.109693 | 0.115670  | 3.023408  |
| C | 2.989715 | -0.218032 | 1.618614  |
| C | 4.140358 | -0.313222 | 0.801037  |
| C | 5.412286 | -0.097429 | 1.332239  |
| N | 5.514843 | 0.158618  | 2.678604  |
| H | 4.628572 | 0.472734  | 4.533002  |
| C | 3.987603 | -0.644373 | -0.652865 |



|   |           |           |           |
|---|-----------|-----------|-----------|
| C | 4.389407  | -1.939573 | -1.116337 |
| C | 3.387737  | 0.249886  | -1.537213 |
| C | 4.952379  | -2.922117 | -0.253224 |
| C | 4.203450  | -2.277531 | -2.497549 |
| C | 3.210947  | -0.101925 | -2.901389 |
| C | 5.328912  | -4.156047 | -0.732874 |
| H | 5.071989  | -2.698667 | 0.800217  |
| C | 4.598055  | -3.562161 | -2.960076 |
| C | 3.615878  | -1.327225 | -3.370554 |
| H | 2.768824  | 0.621257  | -3.578628 |
| C | 5.153011  | -4.482172 | -2.100135 |
| H | 5.754781  | -4.889992 | -0.056019 |
| H | 4.450044  | -3.804942 | -4.008409 |
| H | 3.486860  | -1.582542 | -4.418199 |
| H | 5.450733  | -5.460550 | -2.463846 |
| C | 1.692026  | -0.314956 | 1.033733  |
| H | 1.574222  | -0.612598 | 0.000745  |
| O | 2.116943  | 0.278897  | 3.798823  |
| C | 6.667404  | -0.096558 | 0.505761  |
| H | 6.411669  | -0.133274 | -0.551338 |
| H | 7.257765  | 0.808567  | 0.672548  |
| H | 7.304935  | -0.959910 | 0.725717  |
| C | 2.929834  | 1.610829  | -1.056072 |
| O | 3.639761  | 2.287870  | -0.309673 |
| N | 1.710913  | 1.982036  | -1.529191 |
| H | 1.170876  | 1.251766  | -1.976501 |
| C | 0.917158  | 3.193027  | -1.235423 |
| C | -0.402289 | 2.999607  | -2.017942 |
| H | -1.085796 | 3.818908  | -1.790736 |
| H | -0.192259 | 3.023789  | -3.092872 |
| O | -1.033143 | 1.747334  | -1.758808 |

|   |           |          |           |
|---|-----------|----------|-----------|
| H | -1.542750 | 1.830519 | -0.934053 |
| C | 1.622336  | 4.565505 | -1.576094 |
| C | 2.590853  | 4.403975 | -2.761635 |
| H | 3.446364  | 3.778550 | -2.497594 |
| H | 2.093376  | 3.957827 | -3.629336 |
| H | 2.973589  | 5.384954 | -3.062346 |
| C | 2.378277  | 5.088756 | -0.337160 |
| H | 2.896682  | 6.022883 | -0.581586 |
| H | 1.675078  | 5.302804 | 0.476662  |
| H | 3.105070  | 4.359430 | 0.015835  |
| C | 0.578363  | 5.647446 | -1.943678 |
| H | -0.175667 | 5.771104 | -1.158435 |
| H | 1.090537  | 6.608335 | -2.055266 |
| H | 0.065580  | 5.443706 | -2.888228 |
| N | 0.606865  | 0.058594 | 1.669649  |
| C | -0.655034 | 0.159664 | 1.075070  |
| C | -1.476893 | 1.139350 | 1.823864  |
| O | -1.430983 | 1.256162 | 3.039235  |
| O | -2.224417 | 1.888816 | 0.987879  |
| C | -2.971352 | 3.085158 | 1.483187  |
| C | -3.648706 | 3.614070 | 0.222224  |
| H | -2.911762 | 3.846577 | -0.551442 |
| H | -4.355787 | 2.886706 | -0.174197 |
| H | -4.187502 | 4.535008 | 0.461501  |
| C | -4.011839 | 2.670066 | 2.522692  |
| H | -3.538090 | 2.392507 | 3.463862  |
| H | -4.688346 | 3.512422 | 2.699567  |
| H | -4.580569 | 1.812441 | 2.158865  |
| C | -1.955999 | 4.093809 | 2.022792  |
| H | -2.479501 | 5.010922 | 2.308488  |
| H | -1.437860 | 3.701028 | 2.897983  |

|   |           |           |           |
|---|-----------|-----------|-----------|
| H | -1.218713 | 4.345784  | 1.254033  |
| P | -4.192421 | -1.021838 | 0.630876  |
| O | -4.458591 | -0.585121 | 2.059499  |
| C | -5.167176 | -2.539211 | 0.269451  |
| C | -6.276065 | -2.846767 | 1.069673  |
| C | -4.838186 | -3.386360 | -0.799319 |
| C | -7.047196 | -3.980942 | 0.805029  |
| H | -6.519564 | -2.197005 | 1.904758  |
| C | -5.608096 | -4.519585 | -1.064473 |
| H | -3.969638 | -3.159150 | -1.409855 |
| C | -6.715261 | -4.817343 | -0.263786 |
| H | -7.902875 | -4.213602 | 1.432710  |
| H | -5.344521 | -5.172507 | -1.891833 |
| H | -7.313736 | -5.700113 | -0.469918 |
| C | -4.851115 | 0.183744  | -0.581753 |
| C | -6.120568 | 0.740991  | -0.364455 |
| C | -4.122287 | 0.566128  | -1.715549 |
| C | -6.653355 | 1.662255  | -1.267152 |
| H | -6.686824 | 0.460844  | 0.519443  |
| C | -4.653212 | 1.491012  | -2.616793 |
| H | -3.131734 | 0.155535  | -1.870893 |
| C | -5.919826 | 2.037623  | -2.397298 |
| H | -7.634868 | 2.091602  | -1.087959 |
| H | -4.071771 | 1.792092  | -3.483548 |
| H | -6.331992 | 2.757920  | -3.098028 |
| N | -2.676549 | -1.338780 | 0.111545  |
| C | -1.632404 | -1.533727 | 0.945863  |
| C | -0.516021 | -2.382044 | 0.421518  |
| C | -0.286550 | -2.472164 | -0.961331 |
| C | 0.359034  | -3.039549 | 1.296165  |
| C | 0.790660  | -3.204404 | -1.454064 |

|   |           |           |           |
|---|-----------|-----------|-----------|
| H | -0.964024 | -1.955466 | -1.632627 |
| C | 1.432968  | -3.785798 | 0.800475  |
| H | 0.204274  | -2.957965 | 2.368854  |
| C | 1.652406  | -3.868695 | -0.574165 |
| H | 0.969723  | -3.252451 | -2.524064 |
| H | 2.106728  | -4.285998 | 1.489669  |
| H | 2.497890  | -4.427465 | -0.959830 |
| H | -0.585635 | 0.333791  | 0.008765  |
| C | 6.852432  | 0.362061  | 3.277482  |
| H | 7.496995  | -0.481445 | 3.032301  |
| H | 7.290396  | 1.284040  | 2.892904  |
| H | 6.745873  | 0.434370  | 4.356882  |
| H | -1.810998 | -1.667064 | 2.020936  |
| H | 0.752651  | 0.284932  | 2.674746  |
| H | 0.674689  | 3.195110  | -0.163523 |

#### Vibrational frequencies

|           |          |          |
|-----------|----------|----------|
| -379.5759 | 13.6330  | 16.8918  |
| 19.8919   | 23.2498  | 26.9677  |
| 32.5028   | 39.3033  | 43.6250  |
| 47.2955   | 51.8485  | 53.1927  |
| 56.2105   | 61.0697  | 63.5861  |
| 66.1760   | 68.8781  | 79.6272  |
| 82.5829   | 86.8099  | 90.6686  |
| 92.8829   | 94.8717  | 101.3400 |
| 108.6007  | 115.5593 | 124.6296 |
| 132.7130  | 142.2812 | 150.0034 |
| 152.2384  | 158.0700 | 159.6504 |
| 164.6813  | 175.1709 | 185.4582 |
| 188.0054  | 188.9098 | 196.0880 |
| 204.0526  | 219.3736 | 227.4050 |

|          |          |          |
|----------|----------|----------|
| 232.4116 | 237.0952 | 242.0292 |
| 245.2963 | 250.2866 | 254.1626 |
| 262.3401 | 266.2862 | 269.1584 |
| 279.6233 | 282.4024 | 291.5897 |
| 296.5705 | 298.7038 | 302.1843 |
| 317.7215 | 338.1228 | 340.5925 |
| 345.7825 | 347.2918 | 355.1433 |
| 360.3862 | 368.4179 | 375.8372 |
| 379.6125 | 388.2502 | 394.8525 |
| 399.8085 | 409.8616 | 410.9437 |
| 411.5145 | 412.6511 | 416.1543 |
| 416.8737 | 428.2542 | 440.7081 |
| 442.5173 | 446.7289 | 453.5637 |
| 456.4531 | 471.3054 | 477.2695 |
| 479.4019 | 487.9125 | 500.4221 |
| 515.1926 | 527.6564 | 537.8554 |
| 539.4598 | 541.3001 | 545.7846 |
| 548.8672 | 558.3564 | 576.0850 |
| 584.3406 | 590.8154 | 603.5484 |
| 618.4529 | 628.4564 | 630.4852 |
| 631.7545 | 633.1719 | 636.0539 |
| 643.7990 | 663.7889 | 678.6059 |
| 690.4763 | 706.1470 | 710.6877 |
| 714.4200 | 716.7338 | 722.6104 |
| 740.2744 | 745.4044 | 752.5553 |
| 758.6245 | 762.8015 | 769.4105 |
| 770.7955 | 771.6386 | 779.8967 |
| 787.3188 | 796.4389 | 800.3101 |
| 813.0725 | 820.8455 | 847.5933 |
| 847.8869 | 849.4776 | 857.7217 |
| 865.4923 | 868.0951 | 871.7511 |

|           |           |           |
|-----------|-----------|-----------|
| 873.0238  | 887.9789  | 892.2685  |
| 895.2258  | 910.7922  | 919.8803  |
| 937.3273  | 941.0216  | 942.4370  |
| 944.5451  | 945.6056  | 946.3353  |
| 946.6842  | 959.0956  | 960.9006  |
| 973.7528  | 979.6800  | 981.1259  |
| 987.4844  | 988.8649  | 989.4938  |
| 990.8870  | 1005.9116 | 1006.7346 |
| 1009.0698 | 1010.0727 | 1011.6625 |
| 1012.0665 | 1013.6864 | 1015.0851 |
| 1017.8408 | 1031.8656 | 1039.9307 |
| 1048.7709 | 1049.8098 | 1052.4104 |
| 1053.5020 | 1057.8098 | 1062.8002 |
| 1064.3879 | 1073.0988 | 1074.8227 |
| 1079.8878 | 1080.2110 | 1091.9949 |
| 1099.6173 | 1099.7341 | 1104.0155 |
| 1118.0442 | 1120.3427 | 1124.3090 |
| 1126.9226 | 1133.4377 | 1147.0493 |
| 1156.3555 | 1166.5732 | 1173.7216 |
| 1183.3678 | 1188.8784 | 1189.1504 |
| 1189.6686 | 1191.4668 | 1198.2951 |
| 1199.5571 | 1203.6968 | 1205.0813 |
| 1208.3017 | 1210.8294 | 1217.9794 |
| 1227.7211 | 1243.2517 | 1247.2535 |
| 1252.6058 | 1260.5199 | 1261.2932 |
| 1263.4814 | 1266.8169 | 1279.7436 |
| 1294.4960 | 1294.6152 | 1310.2103 |
| 1316.8725 | 1322.2139 | 1323.5297 |
| 1327.5788 | 1341.6223 | 1344.9942 |
| 1351.2737 | 1353.7412 | 1357.8853 |
| 1361.6577 | 1364.8760 | 1373.1639 |

|           |           |           |
|-----------|-----------|-----------|
| 1401.0044 | 1407.8531 | 1408.4139 |
| 1411.2129 | 1415.9657 | 1417.3481 |
| 1421.0533 | 1422.6207 | 1428.8592 |
| 1435.6436 | 1437.5925 | 1439.0266 |
| 1445.6736 | 1446.6011 | 1448.0195 |
| 1466.6438 | 1470.7636 | 1472.4821 |
| 1475.2623 | 1481.6725 | 1482.2735 |
| 1488.1381 | 1488.8074 | 1491.2668 |
| 1495.7946 | 1497.8042 | 1500.3494 |
| 1501.5320 | 1502.1144 | 1503.1492 |
| 1504.9133 | 1506.3603 | 1512.7521 |
| 1515.0618 | 1515.6684 | 1519.3943 |
| 1519.8208 | 1521.2776 | 1529.2530 |
| 1531.7157 | 1533.3234 | 1539.5124 |
| 1548.3435 | 1553.4877 | 1559.1235 |
| 1578.4423 | 1608.8527 | 1623.4524 |
| 1625.6714 | 1632.5942 | 1635.1763 |
| 1642.2625 | 1643.3953 | 1643.5194 |
| 1651.9608 | 1666.0712 | 1671.8368 |
| 1735.7581 | 1753.9279 | 3018.5280 |
| 3023.3483 | 3031.3611 | 3036.5746 |
| 3045.1563 | 3054.1213 | 3054.8509 |
| 3058.3581 | 3062.0931 | 3069.1255 |
| 3091.8953 | 3092.8381 | 3104.7205 |
| 3108.8743 | 3115.6257 | 3115.9386 |
| 3123.7634 | 3131.3153 | 3133.0956 |
| 3137.4349 | 3141.1465 | 3143.6640 |
| 3161.7934 | 3171.3288 | 3176.9490 |
| 3177.0988 | 3177.1211 | 3177.2600 |
| 3177.5390 | 3178.8815 | 3184.1460 |
| 3185.0851 | 3186.3627 | 3189.2392 |

|           |           |           |
|-----------|-----------|-----------|
| 3190.9667 | 3193.1651 | 3194.8077 |
| 3196.0719 | 3196.0858 | 3196.4202 |
| 3202.0039 | 3204.2466 | 3205.1846 |
| 3207.2470 | 3209.7386 | 3210.3909 |
| 3210.9104 | 3213.9197 | 3222.6010 |
| 3223.2487 | 3224.4747 | 3246.1206 |
| 3255.2343 | 3592.7682 | 3691.0508 |

## MSRR

Zero-point correction= 0.964017

Thermal correction to Energy= 1.021220

Thermal correction to Enthalpy= 1.022164

Thermal correction to Gibbs Free Energy= 0.871540

Sum of electronic and zero-point Energies= -2949.547579

Sum of electronic and thermal Energies= -2949.490375

Sum of electronic and thermal Enthalpies= -2949.489431

Sum of electronic and thermal Free Energies= -2949.640055

## Cartesian coordinates

|   |           |           |           |
|---|-----------|-----------|-----------|
| C | -2.902055 | -2.076370 | -3.593925 |
| C | -1.675250 | -1.979561 | -2.872066 |
| C | -1.820448 | -1.653199 | -1.468165 |
| C | -3.104159 | -1.479988 | -0.905097 |
| C | -4.254322 | -1.648188 | -1.674257 |
| N | -4.098558 | -1.929204 | -3.010635 |
| H | -2.879481 | -2.294089 | -4.652709 |
| C | -3.245120 | -1.089998 | 0.534244  |
| C | -3.239565 | -2.101444 | 1.546379  |
| C | -3.355166 | 0.248699  | 0.883242  |
| C | -3.085733 | -3.483637 | 1.244380  |
| C | -3.395474 | -1.712291 | 2.917925  |



|   |           |           |           |
|---|-----------|-----------|-----------|
| C | -3.482831 | 0.619397  | 2.247427  |
| C | -3.082844 | -4.428506 | 2.246324  |
| H | -2.968170 | -3.790632 | 0.210727  |
| C | -3.394676 | -2.713874 | 3.926049  |
| C | -3.522893 | -0.334196 | 3.234987  |
| H | -3.553230 | 1.672311  | 2.496322  |
| C | -3.239740 | -4.042887 | 3.600281  |
| H | -2.961220 | -5.478247 | 1.998048  |
| H | -3.511755 | -2.408926 | 4.962097  |
| H | -3.633566 | -0.042896 | 4.275396  |
| H | -3.236137 | -4.798910 | 4.379189  |
| C | -0.642951 | -1.534761 | -0.654673 |
| H | -0.716540 | -1.259531 | 0.388807  |
| O | -0.564210 | -2.170682 | -3.455356 |
| C | -5.642777 | -1.494352 | -1.128521 |
| H | -5.601301 | -1.419401 | -0.043883 |
| H | -6.102883 | -0.575104 | -1.501528 |
| H | -6.282355 | -2.342864 | -1.385320 |
| C | -3.388898 | 1.321822  | -0.182135 |
| O | -4.207332 | 1.262657  | -1.112211 |
| N | -2.499206 | 2.314441  | 0.004177  |
| H | -1.763775 | 2.167954  | 0.714491  |
| C | -2.259353 | 3.335640  | -1.010164 |
| C | -0.883011 | 3.066760  | -1.665865 |
| H | -0.794181 | 3.688347  | -2.565321 |
| H | -0.077098 | 3.363933  | -0.981153 |
| O | -0.740157 | 1.708850  | -2.027054 |
| H | -0.195500 | 1.298871  | -1.299167 |
| C | -2.448777 | 4.773002  | -0.437147 |
| C | -2.255778 | 5.805609  | -1.565242 |
| H | -1.224661 | 5.825433  | -1.930770 |

|   |           |           |           |
|---|-----------|-----------|-----------|
| H | -2.914121 | 5.591980  | -2.415393 |
| H | -2.494456 | 6.811167  | -1.201732 |
| C | -1.454841 | 5.069278  | 0.704330  |
| H | -1.671634 | 6.049034  | 1.144362  |
| H | -1.513958 | 4.316681  | 1.495146  |
| H | -0.419727 | 5.090923  | 0.348916  |
| C | -3.886194 | 4.895725  | 0.104341  |
| H | -4.058862 | 4.191557  | 0.923375  |
| H | -4.070522 | 5.908262  | 0.480129  |
| H | -4.621703 | 4.686504  | -0.680855 |
| N | 0.539809  | -1.813249 | -1.134706 |
| C | 1.753279  | -1.532432 | -0.424477 |
| C | 2.894263  | -2.332172 | -1.020875 |
| O | 2.823581  | -2.931179 | -2.078490 |
| O | 3.957444  | -2.220500 | -0.226687 |
| C | 5.270128  | -2.831531 | -0.558099 |
| C | 5.788533  | -2.258314 | -1.877050 |
| H | 5.168178  | -2.574026 | -2.715962 |
| H | 5.797298  | -1.166213 | -1.839489 |
| H | 6.810958  | -2.611018 | -2.041239 |
| C | 6.135928  | -2.385312 | 0.618496  |
| H | 5.715211  | -2.745675 | 1.561619  |
| H | 7.146994  | -2.786530 | 0.509262  |
| H | 6.194930  | -1.293921 | 0.657474  |
| C | 5.117613  | -4.352021 | -0.593678 |
| H | 6.102720  | -4.811053 | -0.717930 |
| H | 4.685396  | -4.711229 | 0.344810  |
| H | 4.478860  | -4.661575 | -1.421519 |
| P | 0.842074  | 1.312544  | 1.492931  |
| O | -0.505846 | 1.915159  | 1.870643  |
| C | 2.191412  | 2.512889  | 1.806898  |

|   |           |           |           |
|---|-----------|-----------|-----------|
| C | 2.594012  | 2.830270  | 3.113537  |
| C | 2.785626  | 3.182103  | 0.727284  |
| C | 3.575177  | 3.797052  | 3.335291  |
| H | 2.147369  | 2.312945  | 3.958273  |
| C | 3.766620  | 4.150716  | 0.948911  |
| H | 2.482220  | 2.930898  | -0.283825 |
| C | 4.162601  | 4.458746  | 2.252480  |
| H | 3.883745  | 4.033013  | 4.349529  |
| H | 4.223768  | 4.659884  | 0.105433  |
| H | 4.928160  | 5.209363  | 2.425860  |
| C | 1.196912  | -0.112206 | 2.594020  |
| C | 0.101707  | -0.907174 | 2.969915  |
| C | 2.493870  | -0.556932 | 2.894997  |
| C | 0.295512  | -2.132624 | 3.607457  |
| H | -0.901591 | -0.554064 | 2.757826  |
| C | 2.689330  | -1.783251 | 3.535521  |
| H | 3.353797  | 0.050350  | 2.629422  |
| C | 1.592801  | -2.575968 | 3.884122  |
| H | -0.563604 | -2.737039 | 3.882579  |
| H | 3.697686  | -2.119893 | 3.758179  |
| H | 1.748289  | -3.532666 | 4.373873  |
| N | 0.924480  | 0.802699  | -0.057098 |
| C | 2.080888  | 0.048689  | -0.452080 |
| C | 2.647096  | 0.477225  | -1.797824 |
| C | 1.914260  | 0.383659  | -2.989886 |
| C | 3.952760  | 0.983200  | -1.851064 |
| C | 2.483847  | 0.775631  | -4.201838 |
| H | 0.897058  | 0.015263  | -2.981656 |
| C | 4.521289  | 1.385186  | -3.061942 |
| H | 4.527957  | 1.066542  | -0.932841 |
| C | 3.787484  | 1.277480  | -4.244271 |

|   |           |           |           |
|---|-----------|-----------|-----------|
| H | 1.904931  | 0.690174  | -5.117100 |
| H | 5.534245  | 1.776804  | -3.079222 |
| H | 4.225229  | 1.583528  | -5.189941 |
| H | 1.635106  | -1.790076 | 0.629141  |
| C | -5.301744 | -2.068050 | -3.862634 |
| H | -5.880745 | -2.932446 | -3.536759 |
| H | -5.908400 | -1.166469 | -3.782874 |
| H | -4.988015 | -2.207648 | -4.893810 |
| H | 2.912943  | 0.106831  | 0.262617  |
| H | 0.554652  | -2.075483 | -2.141289 |
| H | -3.023203 | 3.178412  | -1.777697 |

Vibrational frequencies

|          |          |          |
|----------|----------|----------|
| 16.0167  | 18.4469  | 25.5762  |
| 28.6668  | 30.6184  | 32.1627  |
| 36.4759  | 39.7537  | 44.2578  |
| 45.7606  | 49.4764  | 53.8495  |
| 55.1975  | 58.8397  | 63.4078  |
| 65.5776  | 74.1229  | 76.7249  |
| 84.4510  | 87.1534  | 91.0175  |
| 94.3695  | 106.4412 | 120.0895 |
| 122.1326 | 124.4001 | 127.2378 |
| 134.4943 | 138.2537 | 147.6766 |
| 156.0358 | 163.4433 | 173.8967 |
| 180.8976 | 185.9138 | 193.6652 |
| 195.9836 | 208.5790 | 220.3325 |
| 222.7425 | 224.5104 | 225.1660 |
| 233.5015 | 242.0867 | 247.2657 |
| 251.6903 | 259.8610 | 260.9627 |
| 268.6555 | 274.6985 | 283.7398 |
| 287.7006 | 290.8361 | 293.8489 |

|          |          |          |
|----------|----------|----------|
| 297.0716 | 310.8568 | 317.6191 |
| 321.7979 | 332.4235 | 346.5586 |
| 350.5285 | 360.2168 | 364.7791 |
| 370.1438 | 378.6241 | 383.8854 |
| 388.0609 | 391.7524 | 401.5911 |
| 406.7185 | 408.6908 | 410.2758 |
| 412.4226 | 417.4109 | 422.8325 |
| 428.2750 | 439.9760 | 442.7529 |
| 446.9352 | 450.9355 | 457.2988 |
| 472.3276 | 482.6742 | 483.9964 |
| 508.6110 | 514.6151 | 523.5325 |
| 528.0808 | 532.2605 | 535.3438 |
| 554.5151 | 556.5128 | 563.7109 |
| 569.8277 | 574.2057 | 581.5436 |
| 589.8405 | 613.8711 | 630.1212 |
| 631.7874 | 632.4168 | 641.4029 |
| 648.4263 | 663.2949 | 676.8512 |
| 695.4100 | 696.6202 | 712.5187 |
| 714.6895 | 721.4793 | 729.0404 |
| 732.1795 | 747.0335 | 748.2634 |
| 755.9498 | 764.2626 | 766.0410 |
| 769.5464 | 770.8556 | 775.5413 |
| 785.0205 | 795.4343 | 798.3166 |
| 810.9479 | 811.9932 | 821.4781 |
| 825.0262 | 848.5569 | 854.0068 |
| 858.2631 | 861.8311 | 874.8677 |
| 879.9642 | 885.1694 | 885.9634 |
| 888.5555 | 892.1457 | 908.9982 |
| 920.8167 | 925.0427 | 927.9247 |
| 936.9136 | 937.7533 | 940.2212 |
| 942.7015 | 948.5717 | 949.3248 |

|           |           |           |
|-----------|-----------|-----------|
| 949.5255  | 953.5893  | 966.7945  |
| 973.8906  | 974.7368  | 975.7060  |
| 980.6188  | 983.8155  | 995.2253  |
| 998.8206  | 1001.5927 | 1003.4034 |
| 1009.5861 | 1012.5596 | 1013.6402 |
| 1013.9459 | 1015.6969 | 1020.5912 |
| 1023.3598 | 1033.1143 | 1036.9535 |
| 1049.1859 | 1050.3354 | 1051.8517 |
| 1056.6825 | 1057.9946 | 1058.3277 |
| 1065.1659 | 1069.8019 | 1080.8609 |
| 1094.1178 | 1098.5506 | 1101.6681 |
| 1104.4434 | 1107.7503 | 1112.5680 |
| 1120.2295 | 1130.4652 | 1131.8471 |
| 1138.5364 | 1143.2786 | 1145.8340 |
| 1150.3800 | 1162.5541 | 1180.7220 |
| 1186.8365 | 1189.2284 | 1190.9680 |
| 1191.4938 | 1192.4778 | 1198.0153 |
| 1210.7841 | 1211.1105 | 1213.1591 |
| 1215.3195 | 1223.1951 | 1226.5209 |
| 1242.1822 | 1247.8531 | 1253.1030 |
| 1253.8325 | 1262.6371 | 1279.4284 |
| 1279.4648 | 1284.0968 | 1292.4061 |
| 1294.5085 | 1297.1855 | 1320.2191 |
| 1322.2487 | 1329.0279 | 1330.1620 |
| 1340.4205 | 1348.0257 | 1354.7736 |
| 1357.7655 | 1358.3139 | 1359.3572 |
| 1367.4123 | 1369.7588 | 1386.9301 |
| 1403.7534 | 1409.2970 | 1411.8770 |
| 1412.9501 | 1413.7465 | 1415.8652 |
| 1418.0347 | 1420.8876 | 1424.9277 |
| 1425.6020 | 1426.7061 | 1438.3784 |

|           |           |           |
|-----------|-----------|-----------|
| 1439.2529 | 1445.9073 | 1452.4452 |
| 1466.4923 | 1471.3529 | 1475.2380 |
| 1480.1195 | 1480.7289 | 1482.1726 |
| 1487.6105 | 1494.4095 | 1494.9121 |
| 1495.3441 | 1495.9067 | 1497.2490 |
| 1499.0273 | 1500.6814 | 1503.4781 |
| 1507.4892 | 1508.7744 | 1510.7406 |
| 1512.4226 | 1518.3559 | 1519.9320 |
| 1520.9506 | 1523.2288 | 1528.1960 |
| 1532.0169 | 1540.4649 | 1548.4408 |
| 1553.6176 | 1570.1473 | 1588.2853 |
| 1610.4107 | 1621.2469 | 1624.0849 |
| 1625.3503 | 1637.4382 | 1641.9304 |
| 1644.1015 | 1646.4096 | 1654.9070 |
| 1657.5674 | 1671.6905 | 1682.5260 |
| 1709.4527 | 1783.4254 | 3012.4429 |
| 3019.0680 | 3030.1520 | 3033.5924 |
| 3042.4395 | 3051.9646 | 3057.9132 |
| 3060.2339 | 3065.4731 | 3065.9457 |
| 3086.8588 | 3094.4276 | 3097.6166 |
| 3101.8285 | 3105.7995 | 3112.9389 |
| 3119.2907 | 3122.9720 | 3128.0514 |
| 3130.1462 | 3130.4970 | 3130.7947 |
| 3133.1532 | 3136.6878 | 3141.9267 |
| 3161.9645 | 3166.9896 | 3167.4513 |
| 3174.5046 | 3177.9394 | 3180.4816 |
| 3180.9043 | 3181.4910 | 3181.8524 |
| 3184.6086 | 3184.7883 | 3190.2807 |
| 3191.0203 | 3191.7148 | 3194.0347 |
| 3194.3146 | 3199.0536 | 3201.6671 |
| 3204.5272 | 3204.6024 | 3206.0921 |

|           |           |           |
|-----------|-----------|-----------|
| 3206.8885 | 3207.7619 | 3210.8619 |
| 3215.2070 | 3216.7429 | 3221.0434 |
| 3245.6430 | 3257.2056 | 3257.9107 |

### M5RS

Zero-point correction= 0.963262

Thermal correction to Energy= 1.020925

Thermal correction to Enthalpy= 1.021869

Thermal correction to Gibbs Free Energy= 0.871648

Sum of electronic and zero-point Energies= -2949.521683

Sum of electronic and thermal Energies= -2949.464020

Sum of electronic and thermal Enthalpies= -2949.463076

Sum of electronic and thermal Free Energies= -2949.613297

### Cartesian coordinates

|   |           |           |           |
|---|-----------|-----------|-----------|
| C | -2.397172 | 0.885265  | 4.031496  |
| C | -1.357051 | 0.277638  | 3.260864  |
| C | -1.612807 | 0.240065  | 1.836178  |
| C | -2.805007 | 0.775409  | 1.304360  |
| C | -3.777713 | 1.332914  | 2.136225  |
| N | -3.521255 | 1.369531  | 3.487030  |
| H | -2.284413 | 0.962453  | 5.104203  |
| C | -3.032980 | 0.785275  | -0.178299 |
| C | -2.851535 | 2.002321  | -0.909232 |
| C | -3.378244 | -0.376029 | -0.855873 |
| C | -2.439798 | 3.212962  | -0.285686 |
| C | -3.091492 | 2.007085  | -2.324073 |
| C | -3.587880 | -0.367929 | -2.258123 |
| C | -2.304652 | 4.370187  | -1.016170 |
| H | -2.212623 | 3.214061  | 0.774290  |
| C | -2.941851 | 3.221098  | -3.047597 |



|   |           |           |           |
|---|-----------|-----------|-----------|
| C | -3.465962 | 0.800224  | -2.970529 |
| H | -3.859041 | -1.292758 | -2.756391 |
| C | -2.562874 | 4.378267  | -2.407779 |
| H | -1.963194 | 5.277005  | -0.530750 |
| H | -3.126771 | 3.214781  | -4.118025 |
| H | -3.645715 | 0.810413  | -4.041503 |
| H | -2.439679 | 5.298418  | -2.969513 |
| C | -0.664612 | -0.395281 | 0.969500  |
| H | -0.899549 | -0.514429 | -0.072583 |
| O | -0.321876 | -0.178814 | 3.821863  |
| C | -5.085065 | 1.880291  | 1.638548  |
| H | -5.199867 | 1.654254  | 0.580432  |
| H | -5.935395 | 1.437300  | 2.164664  |
| H | -5.144774 | 2.967736  | 1.757782  |
| C | -3.484371 | -1.666624 | -0.095478 |
| O | -4.292362 | -1.823656 | 0.832246  |
| N | -2.596000 | -2.609791 | -0.481625 |
| H | -1.926522 | -2.363734 | -1.200011 |
| C | -2.514629 | -3.940135 | 0.135577  |
| C | -1.730649 | -3.872865 | 1.462341  |
| H | -1.799675 | -4.853420 | 1.952572  |
| H | -0.670556 | -3.673873 | 1.270802  |
| O | -2.186366 | -2.847330 | 2.334917  |
| H | -3.107878 | -2.635415 | 2.104245  |
| C | -1.978689 | -4.986500 | -0.888596 |
| C | -0.524716 | -4.688238 | -1.307826 |
| H | -0.406322 | -3.695485 | -1.751671 |
| H | 0.170291  | -4.769440 | -0.466810 |
| H | -0.203796 | -5.408021 | -2.067184 |
| C | -2.879769 | -4.965747 | -2.141124 |
| H | -2.571193 | -5.753242 | -2.835974 |

|   |           |           |           |
|---|-----------|-----------|-----------|
| H | -3.928131 | -5.139605 | -1.875122 |
| H | -2.819417 | -4.013088 | -2.674710 |
| C | -2.047279 | -6.393353 | -0.261285 |
| H | -3.057377 | -6.619257 | 0.097890  |
| H | -1.780883 | -7.145633 | -1.010488 |
| H | -1.353622 | -6.506299 | 0.576478  |
| N | 0.421704  | -0.968892 | 1.416065  |
| C | 1.400649  | -1.473753 | 0.505213  |
| C | 2.693841  | -1.721037 | 1.241393  |
| O | 2.940260  | -1.277563 | 2.349843  |
| O | 3.509422  | -2.441832 | 0.467888  |
| C | 4.916290  | -2.729548 | 0.843793  |
| C | 4.939592  | -3.580568 | 2.113753  |
| H | 4.567071  | -3.018247 | 2.970081  |
| H | 4.326015  | -4.476493 | 1.980551  |
| H | 5.967579  | -3.894429 | 2.317677  |
| C | 5.419293  | -3.521779 | -0.361681 |
| H | 5.358586  | -2.916514 | -1.270772 |
| H | 6.461996  | -3.811586 | -0.206028 |
| H | 4.822496  | -4.427248 | -0.503125 |
| C | 5.674051  | -1.412456 | 0.994972  |
| H | 6.737447  | -1.621758 | 1.144705  |
| H | 5.565731  | -0.803636 | 0.093849  |
| H | 5.306280  | -0.835707 | 1.842667  |
| P | 1.617413  | 2.025802  | 0.390488  |
| O | 1.182394  | 2.125488  | 1.842940  |
| C | 1.197378  | 3.581520  | -0.483606 |
| C | 1.067435  | 4.763620  | 0.259043  |
| C | 1.079790  | 3.637460  | -1.879148 |
| C | 0.832507  | 5.981923  | -0.380844 |
| H | 1.145002  | 4.716410  | 1.341024  |

|   |           |           |           |
|---|-----------|-----------|-----------|
| C | 0.846002  | 4.854374  | -2.520899 |
| H | 1.156449  | 2.718458  | -2.451626 |
| C | 0.725435  | 6.029108  | -1.773645 |
| H | 0.731465  | 6.892097  | 0.203817  |
| H | 0.748972  | 4.886559  | -3.602366 |
| H | 0.542074  | 6.975883  | -2.273701 |
| C | 3.461720  | 2.007548  | 0.321722  |
| C | 4.198302  | 2.082475  | 1.510790  |
| C | 4.149517  | 1.938250  | -0.900605 |
| C | 5.594710  | 2.101308  | 1.481805  |
| H | 3.663044  | 2.129537  | 2.453991  |
| C | 5.544645  | 1.953161  | -0.932169 |
| H | 3.588986  | 1.879699  | -1.829657 |
| C | 6.269601  | 2.038652  | 0.260714  |
| H | 6.155684  | 2.163135  | 2.410115  |
| H | 6.066432  | 1.899844  | -1.883503 |
| H | 7.355416  | 2.052242  | 0.236939  |
| N | 1.029303  | 0.858833  | -0.581229 |
| C | 1.649645  | -0.391187 | -0.759676 |
| C | 1.155760  | -1.095769 | -2.021443 |
| C | -0.065323 | -0.750760 | -2.614256 |
| C | 1.904922  | -2.140445 | -2.580209 |
| C | -0.536909 | -1.448726 | -3.730454 |
| H | -0.624703 | 0.085646  | -2.208841 |
| C | 1.445387  | -2.825083 | -3.706777 |
| H | 2.846508  | -2.423327 | -2.117279 |
| C | 0.217459  | -2.487013 | -4.282438 |
| H | -1.488948 | -1.169062 | -4.171079 |
| H | 2.041673  | -3.628489 | -4.129779 |
| H | -0.146154 | -3.025356 | -5.152497 |
| H | 1.061595  | -2.403333 | 0.045926  |

|   |           |           |           |
|---|-----------|-----------|-----------|
| C | -4.526837 | 1.965515  | 4.395744  |
| H | -4.747931 | 2.984045  | 4.077879  |
| H | -5.438038 | 1.367099  | 4.374637  |
| H | -4.124242 | 1.978878  | 5.405251  |
| H | 2.747186  | -0.348745 | -0.808811 |
| H | 0.642560  | -0.787573 | 2.408342  |
| H | -3.547747 | -4.214457 | 0.381350  |

Vibrational frequencies

|          |          |          |
|----------|----------|----------|
| 19.1240  | 21.7811  | 26.7812  |
| 27.3824  | 35.2040  | 36.6684  |
| 43.5948  | 44.5759  | 46.6848  |
| 49.8557  | 53.7405  | 58.0667  |
| 64.0119  | 66.7401  | 70.4376  |
| 73.0209  | 77.6780  | 79.1188  |
| 81.5817  | 89.4585  | 95.4124  |
| 98.8920  | 101.5971 | 106.0502 |
| 108.0618 | 119.1630 | 125.7215 |
| 128.0075 | 134.3279 | 142.6830 |
| 153.5077 | 154.8878 | 159.7122 |
| 171.3963 | 188.3520 | 193.3619 |
| 194.8470 | 201.9987 | 211.4568 |
| 216.2290 | 223.8086 | 233.9400 |
| 235.5780 | 244.3900 | 244.4688 |
| 250.3834 | 254.9999 | 262.6980 |
| 263.9909 | 269.9520 | 281.1527 |
| 288.3101 | 292.4544 | 296.9706 |
| 301.7940 | 303.3741 | 306.4038 |
| 316.5559 | 328.0517 | 343.9355 |
| 349.8193 | 356.5136 | 357.1842 |
| 359.8651 | 374.1448 | 376.1035 |

|          |          |           |
|----------|----------|-----------|
| 384.7680 | 396.4939 | 402.2253  |
| 407.4671 | 408.9092 | 411.9185  |
| 412.6928 | 419.1624 | 425.6069  |
| 433.9009 | 440.7681 | 442.1295  |
| 448.8784 | 453.6116 | 457.9774  |
| 468.0319 | 472.1417 | 478.1215  |
| 484.8881 | 500.3350 | 504.6460  |
| 510.9018 | 525.2869 | 531.2804  |
| 536.5278 | 544.4799 | 549.7795  |
| 554.6072 | 567.9948 | 578.5915  |
| 583.7652 | 599.4034 | 609.7478  |
| 622.8464 | 627.3779 | 629.9422  |
| 631.4048 | 633.4009 | 646.5678  |
| 663.9312 | 668.8522 | 671.9725  |
| 698.9051 | 703.0564 | 708.7688  |
| 712.8275 | 723.2067 | 723.8084  |
| 737.9309 | 752.9683 | 756.3163  |
| 761.1837 | 761.3261 | 762.9147  |
| 768.5123 | 778.7013 | 780.5680  |
| 794.0614 | 796.1586 | 804.0804  |
| 815.7218 | 824.1365 | 827.1820  |
| 848.4745 | 855.8250 | 858.8910  |
| 869.7183 | 873.1697 | 877.8862  |
| 881.1977 | 883.7171 | 888.4531  |
| 895.6370 | 908.1634 | 915.7578  |
| 933.7651 | 938.9720 | 939.5762  |
| 941.5865 | 945.8826 | 948.1281  |
| 949.4694 | 951.5753 | 966.3253  |
| 968.0895 | 982.1676 | 982.9861  |
| 984.3774 | 984.8609 | 986.1679  |
| 990.4578 | 993.9533 | 1003.0533 |

|           |           |           |
|-----------|-----------|-----------|
| 1005.9699 | 1006.7507 | 1010.0005 |
| 1012.3999 | 1013.3232 | 1015.2263 |
| 1018.9943 | 1025.6096 | 1029.8507 |
| 1048.6021 | 1049.0750 | 1050.3714 |
| 1053.7738 | 1057.5824 | 1062.2269 |
| 1065.1209 | 1070.0375 | 1078.9402 |
| 1083.6907 | 1095.2187 | 1097.4932 |
| 1101.4551 | 1111.0732 | 1113.8557 |
| 1114.2790 | 1124.2728 | 1126.8361 |
| 1134.3920 | 1146.5092 | 1153.0896 |
| 1159.9659 | 1180.1342 | 1185.4939 |
| 1187.9679 | 1188.2471 | 1189.0314 |
| 1190.1502 | 1193.6781 | 1198.8166 |
| 1200.1954 | 1203.9664 | 1208.3330 |
| 1209.6073 | 1214.6724 | 1216.3215 |
| 1238.1223 | 1247.6400 | 1254.6513 |
| 1256.1089 | 1261.0993 | 1272.1281 |
| 1274.3539 | 1281.1914 | 1281.6840 |
| 1292.7580 | 1293.4873 | 1305.7852 |
| 1315.6529 | 1321.1105 | 1324.3795 |
| 1327.8675 | 1331.5643 | 1339.1827 |
| 1350.9122 | 1354.3379 | 1358.9230 |
| 1363.9767 | 1368.2814 | 1388.7687 |
| 1389.4987 | 1404.4103 | 1408.5364 |
| 1412.1360 | 1412.7588 | 1414.2856 |
| 1419.5217 | 1423.3993 | 1426.6346 |
| 1429.8973 | 1434.1237 | 1436.6182 |
| 1440.1707 | 1450.5649 | 1453.1872 |
| 1467.8975 | 1471.1915 | 1472.2757 |
| 1474.7422 | 1479.2075 | 1480.4683 |
| 1484.1601 | 1489.6033 | 1490.0630 |

|           |           |           |
|-----------|-----------|-----------|
| 1492.8763 | 1495.5802 | 1495.6218 |
| 1497.1147 | 1502.0524 | 1502.5174 |
| 1502.9100 | 1508.1268 | 1511.6905 |
| 1513.2253 | 1518.6857 | 1518.8342 |
| 1520.0986 | 1521.5781 | 1526.1545 |
| 1529.7460 | 1531.0596 | 1532.8201 |
| 1548.2843 | 1555.8731 | 1567.0672 |
| 1593.0347 | 1614.5262 | 1623.5112 |
| 1625.6193 | 1633.0806 | 1641.9481 |
| 1643.5466 | 1645.2497 | 1651.0322 |
| 1652.2995 | 1673.5575 | 1686.2034 |
| 1703.5692 | 1773.9581 | 2996.5249 |
| 3020.0881 | 3039.7384 | 3043.1788 |
| 3048.7006 | 3051.5351 | 3051.9712 |
| 3054.0665 | 3057.8003 | 3065.1058 |
| 3083.4606 | 3094.5387 | 3109.5633 |
| 3112.4310 | 3113.6468 | 3117.6979 |
| 3120.1854 | 3122.0630 | 3124.0932 |
| 3127.0189 | 3130.1076 | 3130.2024 |
| 3134.7945 | 3139.2891 | 3166.5200 |
| 3174.9878 | 3175.2023 | 3175.3206 |
| 3178.7125 | 3179.7758 | 3180.2480 |
| 3181.3554 | 3183.7415 | 3186.0404 |
| 3188.8112 | 3190.5945 | 3190.7469 |
| 3194.9297 | 3196.4178 | 3199.8883 |
| 3201.2698 | 3205.6750 | 3206.0117 |
| 3206.2625 | 3206.3763 | 3206.8747 |
| 3210.0715 | 3210.8719 | 3215.1482 |
| 3228.3482 | 3254.0873 | 3256.9843 |
| 3322.6992 | 3601.4738 | 3662.9054 |

## M5SS

Zero-point correction= 0.963551

Thermal correction to Energy= 1.021165

Thermal correction to Enthalpy= 1.022109

Thermal correction to Gibbs Free Energy= 0.870326

Sum of electronic and zero-point Energies= -2949.538186

Sum of electronic and thermal Energies= -2949.480572

Sum of electronic and thermal Enthalpies= -2949.479628

Sum of electronic and thermal Free Energies= -2949.631412

### Cartesian coordinates

|   |          |           |           |
|---|----------|-----------|-----------|
| C | 3.278510 | -3.938232 | -1.066611 |
| C | 2.002344 | -3.293206 | -1.040915 |
| C | 2.009322 | -1.970952 | -0.452427 |
| C | 3.205227 | -1.409367 | 0.050960  |
| C | 4.401161 | -2.125766 | 0.012907  |
| N | 4.384356 | -3.376694 | -0.564167 |
| H | 3.366147 | -4.924218 | -1.501773 |
| C | 3.199212 | -0.017910 | 0.606706  |
| C | 3.739344 | 1.054653  | -0.173715 |
| C | 2.614589 | 0.252498  | 1.835714  |
| C | 4.271924 | 0.861893  | -1.479262 |
| C | 3.730378 | 2.380732  | 0.372062  |
| C | 2.586510 | 1.570966  | 2.352240  |
| C | 4.785555 | 1.920428  | -2.195364 |
| H | 4.264034 | -0.130448 | -1.916646 |
| C | 4.274631 | 3.447961  | -0.391382 |
| C | 3.155084 | 2.603897  | 1.650183  |
| H | 2.107488 | 1.748683  | 3.308820  |
| C | 4.793675 | 3.225426  | -1.646197 |
| H | 5.184090 | 1.754108  | -3.191477 |



|   |           |           |           |
|---|-----------|-----------|-----------|
| H | 4.249349  | 4.449123  | 0.026982  |
| H | 3.133528  | 3.614215  | 2.044933  |
| H | 5.198522  | 4.050575  | -2.223851 |
| C | 0.780895  | -1.248120 | -0.338009 |
| H | 0.755529  | -0.256025 | 0.088224  |
| O | 0.977743  | -3.861715 | -1.515944 |
| C | 5.694127  | -1.610156 | 0.576899  |
| H | 5.507810  | -0.695886 | 1.136901  |
| H | 6.153740  | -2.329356 | 1.260306  |
| H | 6.421427  | -1.379730 | -0.209240 |
| C | 1.962366  | -0.863975 | 2.603302  |
| O | 2.618016  | -1.849046 | 2.995307  |
| N | 0.636739  | -0.718687 | 2.776815  |
| H | 0.171425  | 0.066457  | 2.296246  |
| C | -0.162561 | -1.705618 | 3.517806  |
| C | -0.515129 | -2.892812 | 2.603459  |
| O | 0.627467  | -3.531924 | 2.045916  |
| H | 1.422084  | -3.179266 | 2.488513  |
| C | -1.394879 | -1.041627 | 4.210668  |
| C | -1.939697 | -2.003292 | 5.286512  |
| H | -2.293440 | -2.945380 | 4.857952  |
| H | -1.173969 | -2.236067 | 6.034866  |
| H | -2.785940 | -1.540466 | 5.804699  |
| C | -2.515645 | -0.712390 | 3.203036  |
| H | -3.325659 | -0.177814 | 3.711050  |
| H | -2.148746 | -0.067933 | 2.401199  |
| H | -2.949179 | -1.614475 | 2.760008  |
| C | -0.947089 | 0.262063  | 4.903881  |
| H | -0.668589 | 1.030246  | 4.177636  |
| H | -1.766385 | 0.658876  | 5.512626  |
| H | -0.089176 | 0.086193  | 5.562313  |

|   |           |           |           |
|---|-----------|-----------|-----------|
| N | -0.359870 | -1.748995 | -0.722961 |
| C | -1.578690 | -0.988554 | -0.671871 |
| C | -2.768769 | -1.902001 | -0.828641 |
| O | -2.715025 | -3.041445 | -1.256878 |
| O | -3.856963 | -1.231938 | -0.444473 |
| C | -5.221727 | -1.806007 | -0.489792 |
| C | -5.591048 | -2.119007 | -1.939773 |
| H | -5.509026 | -1.217582 | -2.554311 |
| H | -4.943134 | -2.893635 | -2.351871 |
| H | -6.626917 | -2.467843 | -1.981944 |
| C | -5.283339 | -3.036869 | 0.415119  |
| H | -4.935097 | -2.782668 | 1.420806  |
| H | -6.319173 | -3.381082 | 0.486119  |
| H | -4.669186 | -3.846903 | 0.020871  |
| C | -6.068281 | -0.662351 | 0.066598  |
| H | -7.122695 | -0.951514 | 0.078647  |
| H | -5.758881 | -0.417970 | 1.086491  |
| H | -5.954363 | 0.234505  | -0.548262 |
| P | -0.860965 | 2.043252  | -0.018034 |
| O | -0.526372 | 1.365807  | 1.324009  |
| C | -2.619955 | 2.575852  | 0.100753  |
| C | -3.313791 | 2.476468  | 1.314547  |
| C | -3.308628 | 3.008123  | -1.043873 |
| C | -4.671507 | 2.796867  | 1.383654  |
| H | -2.783778 | 2.136832  | 2.197458  |
| C | -4.665468 | 3.327526  | -0.977361 |
| H | -2.779831 | 3.076533  | -1.990783 |
| C | -5.349718 | 3.219022  | 0.237480  |
| H | -5.200793 | 2.712344  | 2.328587  |
| H | -5.190533 | 3.654278  | -1.870334 |
| H | -6.407216 | 3.461413  | 0.288876  |

|   |           |           |           |
|---|-----------|-----------|-----------|
| C | 0.119737  | 3.570418  | -0.180284 |
| C | 0.322752  | 4.368604  | 0.955188  |
| C | 0.659130  | 3.973634  | -1.408491 |
| C | 1.047508  | 5.556632  | 0.862499  |
| H | -0.074414 | 4.046375  | 1.913134  |
| C | 1.392063  | 5.158470  | -1.499475 |
| H | 0.507362  | 3.343012  | -2.278005 |
| C | 1.583650  | 5.952997  | -0.366787 |
| H | 1.200616  | 6.169132  | 1.746380  |
| H | 1.818353  | 5.458731  | -2.452243 |
| H | 2.152320  | 6.875625  | -0.439224 |
| N | -0.626983 | 1.233381  | -1.397213 |
| C | -1.547839 | 0.211215  | -1.770082 |
| C | -1.218677 | -0.387287 | -3.128510 |
| C | 0.097865  | -0.398480 | -3.605800 |
| C | -2.221237 | -0.991769 | -3.897226 |
| C | 0.406710  | -1.011883 | -4.820927 |
| H | 0.865845  | 0.087262  | -3.013521 |
| C | -1.916872 | -1.601948 | -5.115522 |
| H | -3.248620 | -0.980825 | -3.542795 |
| C | -0.599097 | -1.617199 | -5.579456 |
| H | 1.433036  | -1.015746 | -5.177827 |
| H | -2.707469 | -2.061326 | -5.702013 |
| H | -0.359286 | -2.091658 | -6.526687 |
| H | -1.655213 | -0.488771 | 0.293088  |
| C | 5.644801  | -4.151084 | -0.640570 |
| H | 6.404303  | -3.560233 | -1.151797 |
| H | 5.983153  | -4.396365 | 0.366374  |
| H | 5.461162  | -5.067015 | -1.196053 |
| H | -2.600072 | 0.539214  | -1.779111 |
| H | -0.320171 | -2.686410 | -1.161267 |

|   |           |           |          |
|---|-----------|-----------|----------|
| H | 0.494564  | -2.085339 | 4.309775 |
| H | -1.108849 | -3.619554 | 3.174646 |
| H | -1.140816 | -2.544868 | 1.773131 |

Vibrational frequencies

|          |          |          |
|----------|----------|----------|
| 12.9289  | 20.5003  | 24.6600  |
| 27.4476  | 31.7871  | 34.6214  |
| 39.6105  | 44.0567  | 44.7490  |
| 46.0216  | 48.6268  | 51.2704  |
| 53.8094  | 57.0188  | 62.1729  |
| 63.5517  | 67.8802  | 75.1548  |
| 83.3596  | 84.3585  | 90.5446  |
| 94.4733  | 98.7842  | 103.9494 |
| 104.8573 | 112.6388 | 122.9618 |
| 132.2904 | 141.9936 | 146.6273 |
| 150.0107 | 157.6269 | 159.5837 |
| 174.4447 | 181.8570 | 188.9811 |
| 193.4289 | 206.2019 | 211.3225 |
| 224.0354 | 226.4492 | 227.5994 |
| 234.4999 | 237.9325 | 242.6219 |
| 253.0616 | 257.5952 | 261.7069 |
| 265.5290 | 273.9323 | 281.7525 |
| 288.9171 | 290.3860 | 295.0229 |
| 304.8857 | 309.2192 | 320.6170 |
| 330.4332 | 332.4119 | 337.7136 |
| 341.8423 | 357.4667 | 359.3628 |
| 365.9066 | 376.4524 | 378.4207 |
| 386.1335 | 399.7872 | 404.3009 |
| 410.1121 | 410.9717 | 412.2822 |
| 419.4173 | 421.6278 | 425.0273 |
| 435.6290 | 438.6570 | 441.8479 |

|           |           |           |
|-----------|-----------|-----------|
| 444.5392  | 454.8264  | 461.5121  |
| 469.4626  | 472.7719  | 477.5416  |
| 482.4696  | 504.8365  | 518.7001  |
| 521.3052  | 530.1285  | 535.0586  |
| 542.5527  | 550.7724  | 552.9845  |
| 555.3384  | 573.6984  | 581.0490  |
| 587.3723  | 595.3503  | 609.8126  |
| 630.7828  | 630.8512  | 633.9823  |
| 638.1048  | 649.3743  | 664.0213  |
| 671.8121  | 695.6746  | 698.5141  |
| 704.0701  | 709.6714  | 717.5492  |
| 725.8791  | 730.6810  | 744.2803  |
| 754.5414  | 756.9927  | 762.0673  |
| 764.1746  | 766.5196  | 769.1393  |
| 776.3176  | 793.9283  | 795.0398  |
| 797.0934  | 806.2193  | 822.0239  |
| 835.2995  | 844.2079  | 857.3417  |
| 860.0811  | 869.5529  | 871.8543  |
| 872.5097  | 876.7570  | 883.4169  |
| 884.4529  | 888.8063  | 904.5951  |
| 910.1352  | 914.1602  | 917.1079  |
| 933.3257  | 936.2889  | 940.2985  |
| 944.3833  | 947.1502  | 948.6866  |
| 950.3094  | 951.0810  | 965.8390  |
| 977.4951  | 980.1679  | 982.0705  |
| 987.8220  | 989.5546  | 991.2485  |
| 995.4502  | 1002.6348 | 1006.6261 |
| 1008.7565 | 1010.0379 | 1012.9558 |
| 1013.7909 | 1014.9759 | 1017.6951 |
| 1022.6267 | 1030.1781 | 1034.8476 |
| 1048.8404 | 1050.4653 | 1051.6787 |

|           |           |           |
|-----------|-----------|-----------|
| 1055.0020 | 1058.1078 | 1061.6465 |
| 1063.4872 | 1068.6333 | 1076.1350 |
| 1078.3366 | 1086.7363 | 1092.2228 |
| 1100.2467 | 1104.2484 | 1111.4614 |
| 1114.2639 | 1122.1590 | 1125.7034 |
| 1133.9925 | 1137.3193 | 1144.2403 |
| 1153.9066 | 1179.9589 | 1186.5596 |
| 1188.3312 | 1189.5505 | 1189.6836 |
| 1190.2519 | 1192.8731 | 1201.7188 |
| 1203.9159 | 1204.6884 | 1205.9704 |
| 1212.0857 | 1222.8550 | 1224.7484 |
| 1242.2374 | 1248.1711 | 1255.8699 |
| 1257.7938 | 1261.5793 | 1271.5916 |
| 1274.2631 | 1278.2060 | 1288.5539 |
| 1292.3661 | 1298.4507 | 1323.7192 |
| 1326.9534 | 1327.5093 | 1327.9176 |
| 1332.3869 | 1343.5322 | 1344.7324 |
| 1353.3380 | 1354.4411 | 1360.3547 |
| 1362.9434 | 1369.6988 | 1392.1644 |
| 1403.6458 | 1404.3898 | 1407.7384 |
| 1411.3397 | 1412.2877 | 1415.5468 |
| 1419.1473 | 1421.4100 | 1422.6037 |
| 1429.9802 | 1433.6949 | 1438.3632 |
| 1439.7979 | 1450.2538 | 1460.0857 |
| 1468.1341 | 1473.3566 | 1475.2794 |
| 1478.4830 | 1480.7974 | 1482.0165 |
| 1487.9845 | 1490.4059 | 1493.0939 |
| 1494.0116 | 1494.5899 | 1496.0652 |
| 1498.8717 | 1503.4374 | 1504.2529 |
| 1504.4758 | 1507.0978 | 1510.0376 |
| 1511.2632 | 1520.4053 | 1521.4406 |

|           |           |           |
|-----------|-----------|-----------|
| 1521.7767 | 1524.2930 | 1529.7249 |
| 1532.4301 | 1535.1109 | 1535.7349 |
| 1546.5216 | 1555.9983 | 1593.5771 |
| 1606.2175 | 1616.8609 | 1624.2117 |
| 1626.0272 | 1636.9647 | 1642.4327 |
| 1644.9757 | 1647.1268 | 1654.4487 |
| 1657.4673 | 1673.1869 | 1683.2255 |
| 1694.6391 | 1779.9420 | 2972.2768 |
| 3016.9749 | 3036.6754 | 3039.2884 |
| 3044.2736 | 3049.6485 | 3053.5051 |
| 3053.5326 | 3055.4104 | 3061.3222 |
| 3070.6702 | 3094.4705 | 3105.6917 |
| 3107.2054 | 3110.5011 | 3115.5717 |
| 3119.1443 | 3126.1123 | 3126.3654 |
| 3128.2912 | 3135.3712 | 3135.5952 |
| 3139.9589 | 3145.0594 | 3159.4501 |
| 3164.7193 | 3174.4307 | 3176.8238 |
| 3177.5780 | 3178.4544 | 3180.3112 |
| 3180.7567 | 3183.1366 | 3186.0363 |
| 3187.4996 | 3190.3419 | 3192.4709 |
| 3194.9977 | 3196.5932 | 3199.8144 |
| 3202.2848 | 3203.9543 | 3204.0154 |
| 3207.6722 | 3207.7777 | 3211.7640 |
| 3214.7352 | 3214.7724 | 3214.9683 |
| 3216.0814 | 3218.3309 | 3241.0752 |
| 3256.5444 | 3266.7676 | 3607.9117 |

## **TS6RR**

Zero-point correction= 1.030179

Thermal correction to Energy= 1.094469

Thermal correction to Enthalpy= 1.095413

Thermal correction to Gibbs Free Energy= 0.929568

Sum of electronic and zero-point Energies= -3290.969932

Sum of electronic and thermal Energies= -3290.905642

Sum of electronic and thermal Enthalpies= -3290.904698

Sum of electronic and thermal Free Energies= -3291.070543

Cartesian coordinates

|   |           |           |           |
|---|-----------|-----------|-----------|
| C | -2.659574 | -1.402132 | -3.718715 |
| C | -1.371828 | -1.397931 | -3.091313 |
| C | -1.397303 | -1.644306 | -1.667369 |
| C | -2.614698 | -1.930333 | -1.001512 |
| C | -3.816863 | -1.967486 | -1.703897 |
| N | -3.784322 | -1.673778 | -3.054375 |
| H | -2.734752 | -1.180782 | -4.774480 |
| C | -2.600356 | -2.242374 | 0.463484  |
| C | -2.065113 | -3.512324 | 0.881521  |
| C | -3.106976 | -1.358696 | 1.407106  |
| C | -1.565906 | -4.478522 | -0.037291 |
| C | -2.035208 | -3.832225 | 2.278251  |
| C | -3.089053 | -1.709554 | 2.784987  |
| C | -1.040177 | -5.673649 | 0.403555  |
| H | -1.599076 | -4.273437 | -1.100643 |
| C | -1.489796 | -5.074075 | 2.699917  |
| C | -2.556079 | -2.897039 | 3.211232  |
| H | -3.507181 | -1.004099 | 3.493061  |
| C | -0.994768 | -5.975976 | 1.784620  |
| H | -0.661058 | -6.391746 | -0.316831 |
| H | -1.471086 | -5.298064 | 3.762750  |
| H | -2.529131 | -3.139086 | 4.269690  |
| H | -0.576482 | -6.920457 | 2.117916  |
| C | -0.182245 | -1.525146 | -0.925266 |



|   |           |           |           |
|---|-----------|-----------|-----------|
| H | -0.196854 | -1.622703 | 0.153608  |
| O | -0.326111 | -1.181612 | -3.765794 |
| C | -5.141580 | -2.311375 | -1.083196 |
| H | -4.993662 | -2.635258 | -0.055592 |
| H | -5.819838 | -1.451601 | -1.061249 |
| H | -5.642585 | -3.120832 | -1.621290 |
| C | -3.796157 | -0.038069 | 1.118491  |
| O | -4.867461 | 0.187441  | 1.702850  |
| N | -3.180122 | 0.823428  | 0.291667  |
| H | -2.280572 | 0.578222  | -0.112522 |
| C | -3.476413 | 2.260612  | 0.132815  |
| C | -3.524390 | 2.951860  | 1.504926  |
| H | -3.851620 | 3.988446  | 1.374765  |
| H | -4.257492 | 2.451675  | 2.148878  |
| O | -2.237730 | 3.002428  | 2.108882  |
| H | -1.813661 | 2.116791  | 2.055244  |
| C | -4.637832 | 2.589018  | -0.856923 |
| C | -6.027869 | 2.478698  | -0.206245 |
| H | -6.188510 | 1.481746  | 0.207480  |
| H | -6.144006 | 3.199774  | 0.610110  |
| H | -6.807898 | 2.690081  | -0.946935 |
| C | -4.550982 | 1.621929  | -2.051814 |
| H | -4.789592 | 0.604230  | -1.736210 |
| H | -5.258516 | 1.913808  | -2.835268 |
| H | -3.542511 | 1.606136  | -2.478386 |
| C | -4.425941 | 4.026668  | -1.378249 |
| H | -3.449072 | 4.130209  | -1.864115 |
| H | -5.199743 | 4.281683  | -2.110343 |
| H | -4.479758 | 4.766491  | -0.573365 |
| N | 0.963094  | -1.279024 | -1.496596 |
| C | 2.179710  | -1.029766 | -0.759834 |

|   |           |           |           |
|---|-----------|-----------|-----------|
| C | 3.360889  | -1.578886 | -1.547337 |
| O | 3.288515  | -1.953933 | -2.701943 |
| O | 4.439687  | -1.551412 | -0.769747 |
| C | 5.765845  | -2.052528 | -1.216863 |
| C | 6.239749  | -1.265428 | -2.438418 |
| H | 5.617140  | -1.473653 | -3.308499 |
| H | 6.211848  | -0.192206 | -2.235059 |
| H | 7.271547  | -1.549675 | -2.665043 |
| C | 6.640730  | -1.767673 | 0.002128  |
| H | 6.244106  | -2.277349 | 0.884673  |
| H | 7.658915  | -2.121134 | -0.180646 |
| H | 6.674891  | -0.693743 | 0.206270  |
| C | 5.654364  | -3.552669 | -1.487941 |
| H | 6.647381  | -3.955248 | -1.707488 |
| H | 5.259102  | -4.068398 | -0.607970 |
| H | 5.000928  | -3.748925 | -2.339042 |
| P | 0.777098  | 0.889215  | 1.771147  |
| O | -0.722929 | 0.700079  | 1.944058  |
| C | 1.353012  | 2.297224  | 2.775724  |
| C | 0.578061  | 2.727128  | 3.861889  |
| C | 2.574600  | 2.931074  | 2.505137  |
| C | 1.026818  | 3.768818  | 4.675270  |
| H | -0.384987 | 2.262240  | 4.043590  |
| C | 3.027496  | 3.964295  | 3.325541  |
| H | 3.156691  | 2.638122  | 1.636789  |
| C | 2.254814  | 4.381780  | 4.413024  |
| H | 0.418308  | 4.104442  | 5.509845  |
| H | 3.974037  | 4.451102  | 3.110496  |
| H | 2.604818  | 5.190219  | 5.048174  |
| C | 1.648708  | -0.574005 | 2.443530  |
| C | 0.907699  | -1.755450 | 2.602401  |

|   |           |           |           |
|---|-----------|-----------|-----------|
| C | 3.029921  | -0.591926 | 2.692938  |
| C | 1.543649  | -2.947107 | 2.954195  |
| H | -0.166276 | -1.728648 | 2.451824  |
| C | 3.664512  | -1.783611 | 3.046829  |
| H | 3.613269  | 0.320552  | 2.614888  |
| C | 2.925002  | -2.964089 | 3.164213  |
| H | 0.960704  | -3.857000 | 3.055978  |
| H | 4.735082  | -1.790727 | 3.227877  |
| H | 3.423344  | -3.891760 | 3.428804  |
| N | 1.242629  | 1.133043  | 0.200094  |
| C | 2.409723  | 0.511606  | -0.404347 |
| C | 2.878104  | 1.289977  | -1.624441 |
| C | 4.195582  | 1.761151  | -1.669191 |
| C | 2.029058  | 1.544324  | -2.711389 |
| C | 4.664549  | 2.470862  | -2.776993 |
| H | 4.858794  | 1.571659  | -0.829519 |
| C | 2.497980  | 2.251543  | -3.818881 |
| H | 0.997520  | 1.212581  | -2.684062 |
| C | 3.815717  | 2.715644  | -3.857588 |
| H | 5.688813  | 2.831520  | -2.792629 |
| H | 1.829664  | 2.443299  | -4.653400 |
| H | 4.175901  | 3.266918  | -4.721144 |
| H | 2.123570  | -1.563190 | 0.189386  |
| C | -5.055719 | -1.655892 | -3.815378 |
| H | -5.493985 | -2.653795 | -3.815596 |
| H | -5.742881 | -0.948669 | -3.352208 |
| H | -4.849569 | -1.347238 | -4.836791 |
| H | 3.264294  | 0.450701  | 0.279044  |
| O | -0.982734 | 1.189928  | -1.481535 |
| H | -0.231605 | 1.069836  | -0.849354 |
| C | 0.442773  | 4.309400  | -0.983438 |

|   |           |           |           |
|---|-----------|-----------|-----------|
| O | 1.253812  | 3.678405  | -0.190421 |
| O | 0.717032  | 5.633492  | -0.979383 |
| H | 0.080028  | 6.051029  | -1.579873 |
| O | -0.468255 | 3.853675  | -1.679238 |
| H | 1.158623  | 2.604611  | -0.110462 |
| H | 0.925443  | -1.188821 | -2.530450 |
| H | -0.956104 | 2.159508  | -1.608618 |
| H | -2.568143 | 2.638569  | -0.339955 |

Vibrational frequencies

|          |          |          |
|----------|----------|----------|
| 15.3776  | 21.0778  | 23.2332  |
| 27.5812  | 31.3761  | 33.8093  |
| 34.6605  | 38.9649  | 40.6336  |
| 42.1907  | 46.6131  | 48.7338  |
| 51.4721  | 54.5645  | 56.0580  |
| 61.2977  | 68.0454  | 68.9172  |
| 72.3852  | 74.6661  | 81.5293  |
| 83.2679  | 89.0671  | 90.9655  |
| 94.0415  | 106.0073 | 107.7389 |
| 114.1401 | 117.2927 | 119.7989 |
| 122.4733 | 127.6578 | 136.5600 |
| 139.6616 | 140.9807 | 147.3627 |
| 153.7069 | 162.7843 | 167.0186 |
| 174.8754 | 187.2076 | 191.7105 |
| 199.7383 | 205.9898 | 211.7253 |
| 218.9192 | 224.0816 | 226.2183 |
| 229.4338 | 231.4402 | 238.0696 |
| 241.0757 | 250.9284 | 254.9235 |
| 255.8610 | 262.5037 | 272.8191 |
| 275.3018 | 281.6641 | 285.4770 |
| 288.6793 | 292.0737 | 292.6964 |

|          |          |          |
|----------|----------|----------|
| 307.6436 | 311.1654 | 324.5129 |
| 328.2510 | 333.0948 | 340.3039 |
| 348.2205 | 352.4279 | 360.2133 |
| 369.4482 | 382.1758 | 386.1540 |
| 392.3931 | 397.0015 | 402.4799 |
| 406.8678 | 409.5259 | 413.5931 |
| 418.8929 | 422.6795 | 423.8223 |
| 427.0776 | 433.7048 | 440.8600 |
| 443.2077 | 445.8117 | 454.9785 |
| 472.4898 | 478.8192 | 486.9634 |
| 489.2411 | 509.1778 | 518.1974 |
| 525.1625 | 534.5603 | 535.8390 |
| 543.8755 | 552.5854 | 552.9440 |
| 553.9870 | 569.6704 | 574.4188 |
| 584.4421 | 598.0191 | 605.0568 |
| 613.7491 | 624.6165 | 630.6549 |
| 631.7674 | 632.6801 | 637.4987 |
| 649.2400 | 665.3738 | 666.7715 |
| 668.0938 | 681.3125 | 691.5847 |
| 695.5816 | 701.4443 | 708.3587 |
| 713.0044 | 717.7996 | 723.6753 |
| 731.9923 | 734.1006 | 749.5692 |
| 755.3470 | 756.6095 | 766.0419 |
| 770.8746 | 771.7377 | 779.4128 |
| 784.8994 | 788.8721 | 790.6447 |
| 794.9040 | 795.5906 | 808.4513 |
| 821.1960 | 832.5305 | 842.8416 |
| 849.3630 | 852.6955 | 868.8726 |
| 869.4432 | 874.2908 | 877.4265 |
| 884.9069 | 887.4878 | 888.7039 |
| 904.7782 | 912.1966 | 916.2022 |

|           |           |           |
|-----------|-----------|-----------|
| 935.9944  | 939.6087  | 940.0429  |
| 943.3544  | 943.8736  | 947.4992  |
| 952.3860  | 952.6391  | 958.1970  |
| 970.2623  | 973.4050  | 984.2727  |
| 984.9203  | 985.4748  | 988.6618  |
| 994.6887  | 1000.8568 | 1004.9264 |
| 1005.6028 | 1008.4249 | 1010.4408 |
| 1013.3210 | 1013.7551 | 1015.2089 |
| 1016.2057 | 1024.2309 | 1028.1629 |
| 1038.1801 | 1039.8612 | 1050.5839 |
| 1052.4215 | 1055.2758 | 1059.9245 |
| 1060.6988 | 1061.8386 | 1065.8282 |
| 1069.8459 | 1074.9331 | 1080.3289 |
| 1088.1988 | 1096.8481 | 1101.4334 |
| 1106.4553 | 1113.8772 | 1119.8028 |
| 1123.6581 | 1130.2450 | 1131.9964 |
| 1141.4152 | 1149.0277 | 1152.6736 |
| 1156.6965 | 1179.5937 | 1185.2559 |
| 1189.4720 | 1192.1930 | 1192.6644 |
| 1193.7606 | 1197.0839 | 1209.8542 |
| 1210.7951 | 1212.0466 | 1216.3707 |
| 1221.2404 | 1228.2049 | 1228.5891 |
| 1241.4191 | 1246.7214 | 1248.4778 |
| 1254.7430 | 1256.2012 | 1267.4742 |
| 1280.0449 | 1285.2674 | 1286.6433 |
| 1293.9061 | 1298.7147 | 1312.7062 |
| 1320.9775 | 1326.5717 | 1328.0169 |
| 1330.5293 | 1334.6914 | 1344.1835 |
| 1346.4792 | 1356.1065 | 1357.5821 |
| 1361.1842 | 1363.1039 | 1370.9549 |
| 1374.3912 | 1402.4231 | 1407.4293 |

|           |           |           |
|-----------|-----------|-----------|
| 1408.1282 | 1415.0398 | 1415.0797 |
| 1416.0617 | 1416.7414 | 1418.3330 |
| 1419.2929 | 1426.1170 | 1430.9026 |
| 1434.7045 | 1440.0915 | 1441.1725 |
| 1447.6556 | 1459.9114 | 1463.8596 |
| 1469.1552 | 1473.5505 | 1476.4669 |
| 1480.5998 | 1480.8312 | 1484.7653 |
| 1485.4701 | 1490.2414 | 1491.9852 |
| 1494.8828 | 1495.5676 | 1497.5458 |
| 1499.0548 | 1499.3393 | 1503.6174 |
| 1504.5810 | 1506.9855 | 1510.8546 |
| 1511.4640 | 1513.2712 | 1518.1202 |
| 1523.5489 | 1524.7819 | 1529.8591 |
| 1531.3070 | 1532.0878 | 1542.2574 |
| 1542.9977 | 1552.5172 | 1568.9711 |
| 1602.0801 | 1611.6553 | 1623.3558 |
| 1627.2388 | 1637.8108 | 1642.8958 |
| 1644.7388 | 1649.5774 | 1657.1760 |
| 1659.3460 | 1670.8880 | 1681.0816 |
| 1696.7706 | 1704.6579 | 1734.7148 |
| 1788.7014 | 1921.9808 | 3032.6484 |
| 3036.0788 | 3042.8642 | 3045.1221 |
| 3046.0476 | 3053.0560 | 3055.1410 |
| 3058.5707 | 3066.2019 | 3086.8113 |
| 3097.6181 | 3098.2384 | 3104.9839 |
| 3111.2233 | 3112.6903 | 3114.3197 |
| 3116.1423 | 3127.8628 | 3130.0861 |
| 3132.2526 | 3137.3201 | 3141.8790 |
| 3142.2006 | 3149.0415 | 3158.6890 |
| 3165.8254 | 3168.5910 | 3176.8880 |
| 3181.8775 | 3183.8221 | 3184.7323 |

|           |           |           |
|-----------|-----------|-----------|
| 3185.4068 | 3186.0083 | 3186.4521 |
| 3189.0266 | 3191.0051 | 3193.6102 |
| 3194.1835 | 3195.3424 | 3197.5919 |
| 3203.1214 | 3205.8961 | 3207.3044 |
| 3207.8597 | 3209.6525 | 3210.6404 |
| 3214.3443 | 3215.2802 | 3219.3263 |
| 3223.7531 | 3224.3550 | 3240.3265 |
| 3255.3922 | 3349.5974 | 3479.1179 |
| 3524.8066 | 3594.6157 | 3792.3546 |

### M6RR

Zero-point correction= 1.032761

Thermal correction to Energy= 1.097112

Thermal correction to Enthalpy= 1.098056

Thermal correction to Gibbs Free Energy= 0.933171

Sum of electronic and zero-point Energies= -3290.979819

Sum of electronic and thermal Energies= -3290.915468

Sum of electronic and thermal Enthalpies= -3290.914524

Sum of electronic and thermal Free Energies= -3291.079409

### Cartesian coordinates

|   |           |           |           |
|---|-----------|-----------|-----------|
| C | -2.402273 | -1.986212 | -3.579218 |
| C | -1.124553 | -1.757568 | -2.969355 |
| C | -1.110766 | -1.910837 | -1.532633 |
| C | -2.273494 | -2.323032 | -0.831791 |
| C | -3.460074 | -2.572480 | -1.513965 |
| N | -3.473207 | -2.366845 | -2.883715 |
| H | -2.510567 | -1.850799 | -4.646598 |
| C | -2.197654 | -2.523043 | 0.650377  |
| C | -1.451686 | -3.650699 | 1.147012  |
| C | -2.819657 | -1.656881 | 1.539835  |



|   |           |           |           |
|---|-----------|-----------|-----------|
| C | -0.822733 | -4.597823 | 0.289507  |
| C | -1.330412 | -3.839349 | 2.562417  |
| C | -2.711079 | -1.884132 | 2.939690  |
| C | -0.088840 | -5.644567 | 0.804005  |
| H | -0.919879 | -4.496309 | -0.784785 |
| C | -0.569895 | -4.930564 | 3.060840  |
| C | -1.976248 | -2.926887 | 3.437861  |
| H | -3.223589 | -1.199951 | 3.605204  |
| C | 0.047285  | -5.812243 | 2.201961  |
| H | 0.386271  | -6.349630 | 0.129152  |
| H | -0.485169 | -5.054645 | 4.136725  |
| H | -1.881035 | -3.069838 | 4.510220  |
| H | 0.630290  | -6.640069 | 2.592869  |
| C | 0.074208  | -1.573340 | -0.817074 |
| H | 0.073562  | -1.597905 | 0.266376  |
| O | -0.123284 | -1.440066 | -3.667776 |
| C | -4.724238 | -3.046040 | -0.854345 |
| H | -4.526799 | -3.285784 | 0.188118  |
| H | -5.506096 | -2.278909 | -0.873043 |
| H | -5.121813 | -3.943543 | -1.335950 |
| C | -3.720560 | -0.489845 | 1.179892  |
| O | -4.788787 | -0.384039 | 1.800817  |
| N | -3.285267 | 0.386919  | 0.256645  |
| H | -2.378320 | 0.251498  | -0.181237 |
| C | -3.818505 | 1.743794  | 0.011406  |
| C | -3.944790 | 2.513959  | 1.334335  |
| H | -4.406770 | 3.486575  | 1.141070  |
| H | -4.591318 | 1.969699  | 2.032132  |
| O | -2.666282 | 2.779881  | 1.905432  |
| H | -2.113589 | 1.973174  | 1.859320  |
| C | -5.041127 | 1.805256  | -0.954920 |

|   |           |           |           |
|---|-----------|-----------|-----------|
| C | -6.365007 | 1.399413  | -0.285506 |
| H | -6.312170 | 0.385128  | 0.114043  |
| H | -6.612985 | 2.068530  | 0.545432  |
| H | -7.184616 | 1.453974  | -1.011728 |
| C | -4.761094 | 0.868076  | -2.144319 |
| H | -4.730383 | -0.171340 | -1.811714 |
| H | -5.545680 | 0.963052  | -2.902564 |
| H | -3.795679 | 1.092344  | -2.609658 |
| C | -5.155396 | 3.248542  | -1.493830 |
| H | -4.206072 | 3.580007  | -1.928036 |
| H | -5.930139 | 3.300151  | -2.266738 |
| H | -5.434175 | 3.957797  | -0.707945 |
| N | 1.174283  | -1.204564 | -1.413297 |
| C | 2.359571  | -0.780808 | -0.699305 |
| C | 3.594933  | -1.316267 | -1.420976 |
| O | 3.556498  | -1.833580 | -2.519275 |
| O | 4.658732  | -1.104647 | -0.654544 |
| C | 6.026906  | -1.553394 | -1.038125 |
| C | 6.453294  | -0.867619 | -2.335420 |
| H | 5.838874  | -1.193433 | -3.174885 |
| H | 6.373523  | 0.217982  | -2.240129 |
| H | 7.497181  | -1.120437 | -2.542852 |
| C | 6.861866  | -1.076901 | 0.147939  |
| H | 6.499389  | -1.527442 | 1.076111  |
| H | 7.906954  | -1.362829 | 0.002875  |
| H | 6.807079  | 0.011129  | 0.243637  |
| C | 6.028538  | -3.077675 | -1.147198 |
| H | 7.053530  | -3.425465 | -1.304022 |
| H | 5.650019  | -3.523644 | -0.222922 |
| H | 5.413765  | -3.413162 | -1.983365 |
| P | 0.723870  | 1.196100  | 1.678635  |

|   |           |           |           |
|---|-----------|-----------|-----------|
| O | -0.721654 | 0.760479  | 1.789312  |
| C | 1.028283  | 2.793074  | 2.475004  |
| C | 0.159381  | 3.215519  | 3.490521  |
| C | 2.129784  | 3.585817  | 2.121845  |
| C | 0.402700  | 4.416197  | 4.158311  |
| H | -0.716228 | 2.621693  | 3.728547  |
| C | 2.374519  | 4.779642  | 2.798613  |
| H | 2.778515  | 3.286703  | 1.304561  |
| C | 1.513030  | 5.193208  | 3.818851  |
| H | -0.275666 | 4.747003  | 4.938704  |
| H | 3.227074  | 5.392336  | 2.522617  |
| H | 1.701684  | 6.126281  | 4.341226  |
| C | 1.818584  | -0.035094 | 2.447372  |
| C | 1.272463  | -1.294455 | 2.740252  |
| C | 3.182132  | 0.202779  | 2.678985  |
| C | 2.092486  | -2.321109 | 3.210654  |
| H | 0.209359  | -1.458804 | 2.600702  |
| C | 3.997964  | -0.825637 | 3.150754  |
| H | 3.607898  | 1.185024  | 2.498282  |
| C | 3.456886  | -2.089867 | 3.403725  |
| H | 1.665245  | -3.297319 | 3.415899  |
| H | 5.054153  | -0.640890 | 3.318814  |
| H | 4.097536  | -2.890308 | 3.760584  |
| N | 1.249251  | 1.341942  | 0.074676  |
| C | 2.466217  | 0.782310  | -0.521362 |
| C | 2.794088  | 1.478752  | -1.829719 |
| C | 4.080622  | 1.999779  | -2.013567 |
| C | 1.857419  | 1.582757  | -2.868980 |
| C | 4.436921  | 2.605228  | -3.219966 |
| H | 4.806657  | 1.930467  | -1.208758 |
| C | 2.216094  | 2.189056  | -4.073312 |

|   |           |           |           |
|---|-----------|-----------|-----------|
| H | 0.847130  | 1.210746  | -2.737844 |
| C | 3.504716  | 2.697800  | -4.254760 |
| H | 5.438356  | 3.004886  | -3.347302 |
| H | 1.483999  | 2.265027  | -4.871738 |
| H | 3.778200  | 3.168024  | -5.194513 |
| H | 2.336375  | -1.225488 | 0.296250  |
| C | -4.736269 | -2.582765 | -3.628781 |
| H | -5.011903 | -3.636083 | -3.577749 |
| H | -5.523371 | -1.970846 | -3.190501 |
| H | -4.586276 | -2.292987 | -4.665324 |
| H | 3.330151  | 0.897093  | 0.139263  |
| O | -1.168014 | 0.978138  | -1.611899 |
| H | -0.429622 | 0.986358  | -0.979966 |
| C | -0.795876 | 4.205111  | -1.058881 |
| O | 0.291414  | 3.833781  | -0.563504 |
| O | -1.181654 | 5.486987  | -0.707032 |
| H | -2.031636 | 5.634648  | -1.147836 |
| O | -1.577036 | 3.584730  | -1.835890 |
| H | 0.972921  | 2.272910  | -0.308216 |
| H | 1.128731  | -1.194711 | -2.450680 |
| H | -1.325329 | 1.949609  | -1.770723 |
| H | -3.002443 | 2.232121  | -0.522173 |

#### Vibrational frequencies

|         |         |         |
|---------|---------|---------|
| 17.5228 | 23.7430 | 27.3669 |
| 30.0985 | 35.7436 | 36.4819 |
| 38.5736 | 41.5762 | 43.5621 |
| 45.9798 | 48.2838 | 51.2602 |
| 54.1880 | 56.7737 | 60.2891 |
| 63.8661 | 70.6382 | 70.9837 |
| 77.2627 | 80.6319 | 84.8756 |

|          |          |          |
|----------|----------|----------|
| 87.6171  | 88.8817  | 91.1650  |
| 95.3324  | 103.4141 | 110.3303 |
| 111.2839 | 112.9029 | 118.6143 |
| 121.5990 | 126.2806 | 128.1963 |
| 130.7468 | 141.8242 | 145.6026 |
| 148.1247 | 156.7791 | 162.4777 |
| 169.3941 | 175.0740 | 188.0173 |
| 196.4459 | 200.5163 | 207.3178 |
| 217.3812 | 223.2255 | 228.0987 |
| 229.6751 | 230.3664 | 236.7928 |
| 242.8452 | 250.0446 | 253.5889 |
| 253.9260 | 263.0577 | 269.1018 |
| 277.6347 | 287.6942 | 291.6123 |
| 291.8796 | 294.9979 | 298.2005 |
| 310.7464 | 313.2090 | 322.8899 |
| 324.8760 | 331.4044 | 335.1319 |
| 341.8821 | 353.8972 | 358.8585 |
| 367.8142 | 380.0493 | 384.5143 |
| 389.0217 | 396.2861 | 402.5089 |
| 406.0687 | 408.3609 | 413.7632 |
| 414.1178 | 417.6540 | 424.8753 |
| 426.6607 | 430.6699 | 438.5664 |
| 441.5614 | 444.9903 | 454.0137 |
| 471.4765 | 477.2369 | 482.1970 |
| 488.6201 | 506.7226 | 517.8116 |
| 520.0086 | 532.0956 | 534.6440 |
| 537.0534 | 542.9296 | 552.4074 |
| 558.4418 | 570.3814 | 583.7350 |
| 588.2843 | 592.1618 | 597.9985 |
| 599.6796 | 623.2176 | 626.7729 |
| 629.6419 | 630.8818 | 633.5429 |

|           |           |           |
|-----------|-----------|-----------|
| 636.8202  | 641.2928  | 656.1293  |
| 666.8184  | 676.1787  | 686.2607  |
| 690.4129  | 703.5304  | 709.7957  |
| 718.0384  | 720.7175  | 723.9498  |
| 736.5273  | 741.2425  | 752.4760  |
| 754.9572  | 761.2325  | 766.2864  |
| 769.9774  | 773.5475  | 780.3446  |
| 787.5548  | 788.9484  | 794.6996  |
| 802.8260  | 807.1243  | 809.3736  |
| 826.7497  | 831.0082  | 848.2759  |
| 849.1672  | 852.0323  | 869.3218  |
| 871.7818  | 873.8573  | 882.2030  |
| 882.8196  | 886.1707  | 887.7658  |
| 908.1633  | 912.1437  | 916.7650  |
| 935.1041  | 938.7260  | 941.0602  |
| 941.7617  | 945.6850  | 948.3670  |
| 951.4248  | 959.1801  | 959.9077  |
| 970.4738  | 971.2902  | 982.6865  |
| 984.4247  | 985.8772  | 990.2691  |
| 993.3349  | 1000.5838 | 1002.5816 |
| 1004.4167 | 1006.0530 | 1007.6551 |
| 1012.5741 | 1014.6744 | 1016.5940 |
| 1016.9093 | 1023.9115 | 1025.8387 |
| 1029.6741 | 1036.9374 | 1041.1578 |
| 1050.8636 | 1052.1620 | 1053.6618 |
| 1059.8917 | 1060.5530 | 1064.8103 |
| 1065.2065 | 1070.2928 | 1073.6242 |
| 1076.7089 | 1093.4335 | 1104.5229 |
| 1107.4520 | 1109.7867 | 1113.0496 |
| 1122.7171 | 1123.2251 | 1133.3156 |
| 1135.8027 | 1137.6802 | 1148.4038 |

|           |           |           |
|-----------|-----------|-----------|
| 1153.0966 | 1177.0654 | 1179.9966 |
| 1184.2475 | 1189.1983 | 1193.9919 |
| 1194.3811 | 1196.4226 | 1196.8397 |
| 1209.5065 | 1213.7226 | 1216.4510 |
| 1217.4302 | 1225.6602 | 1227.5909 |
| 1230.9719 | 1242.7506 | 1247.2366 |
| 1248.3507 | 1251.5714 | 1254.3490 |
| 1262.6586 | 1280.2081 | 1283.5195 |
| 1288.4364 | 1294.2041 | 1297.4975 |
| 1322.9059 | 1328.3588 | 1330.8598 |
| 1332.7750 | 1336.6251 | 1351.0671 |
| 1356.0400 | 1359.5497 | 1360.2907 |
| 1363.7361 | 1371.0796 | 1373.2131 |
| 1375.5844 | 1399.2222 | 1402.3562 |
| 1407.2733 | 1411.6031 | 1414.9379 |
| 1415.0342 | 1416.0552 | 1417.2004 |
| 1417.6704 | 1426.0592 | 1434.5518 |
| 1434.9340 | 1440.3489 | 1440.6624 |
| 1446.2305 | 1457.1661 | 1459.4372 |
| 1463.6301 | 1474.7894 | 1477.9049 |
| 1480.2928 | 1481.0696 | 1484.2969 |
| 1490.0338 | 1490.1647 | 1493.9195 |
| 1495.3723 | 1495.8737 | 1496.9137 |
| 1502.2325 | 1503.5311 | 1505.0083 |
| 1505.6891 | 1511.2248 | 1511.3059 |
| 1514.0564 | 1516.3184 | 1519.0340 |
| 1523.8294 | 1526.3492 | 1530.3149 |
| 1531.4779 | 1533.0660 | 1538.8537 |
| 1544.0889 | 1552.2287 | 1562.7848 |
| 1606.3898 | 1611.4979 | 1624.1205 |
| 1628.7594 | 1639.0534 | 1642.6187 |

|           |           |           |
|-----------|-----------|-----------|
| 1645.2789 | 1650.0771 | 1658.7282 |
| 1660.6496 | 1671.1528 | 1697.9692 |
| 1704.7815 | 1718.9575 | 1734.5329 |
| 1796.6890 | 3032.2885 | 3035.6772 |
| 3046.6391 | 3046.8194 | 3050.2239 |
| 3054.0288 | 3056.4873 | 3059.4001 |
| 3066.0895 | 3077.5188 | 3094.3452 |
| 3096.8918 | 3097.5434 | 3106.0261 |
| 3114.1672 | 3116.7445 | 3117.8247 |
| 3128.5572 | 3131.2952 | 3133.1059 |
| 3136.8127 | 3137.1412 | 3142.4898 |
| 3144.1953 | 3147.9097 | 3160.1859 |
| 3166.9508 | 3171.2774 | 3182.6417 |
| 3185.0169 | 3185.0900 | 3185.7575 |
| 3186.4567 | 3189.0843 | 3189.7196 |
| 3192.0502 | 3193.6475 | 3195.8770 |
| 3197.2323 | 3197.9231 | 3202.0269 |
| 3206.8179 | 3207.5310 | 3209.1660 |
| 3210.0772 | 3210.7916 | 3211.3607 |
| 3213.3731 | 3219.7251 | 3220.1009 |
| 3222.3761 | 3226.3666 | 3227.0788 |
| 3236.0667 | 3256.1275 | 3526.1120 |
| 3566.8423 | 3706.0566 | 3793.5898 |

### **TS7RR**

Zero-point correction= 1.030432

Thermal correction to Energy= 1.094390

Thermal correction to Enthalpy= 1.095335

Thermal correction to Gibbs Free Energy= 0.928001

Sum of electronic and zero-point Energies= -3290.969739

Sum of electronic and thermal Energies= -3290.905781



Sum of electronic and thermal Enthalpies= -3290.904836

Sum of electronic and thermal Free Energies= -3291.072170

Cartesian coordinates

|   |           |           |           |
|---|-----------|-----------|-----------|
| C | 1.659860  | -3.471601 | 3.445307  |
| C | 0.670500  | -2.623131 | 2.866905  |
| C | 0.949443  | -2.258068 | 1.500765  |
| C | 2.070691  | -2.745468 | 0.825038  |
| C | 2.986157  | -3.591303 | 1.463290  |
| N | 2.744888  | -3.904839 | 2.771056  |
| H | 1.558600  | -3.786656 | 4.474727  |
| C | 2.228699  | -2.435800 | -0.635370 |
| C | 1.524207  | -3.273889 | -1.564133 |
| C | 2.941531  | -1.336557 | -1.099251 |
| C | 0.733154  | -4.381406 | -1.143711 |
| C | 1.595371  | -2.986630 | -2.967391 |
| C | 3.009876  | -1.075851 | -2.497111 |
| C | 0.051987  | -5.153191 | -2.058444 |
| H | 0.663022  | -4.613472 | -0.087708 |
| C | 0.889007  | -3.809446 | -3.885942 |
| C | 2.362952  | -1.877236 | -3.404177 |
| H | 3.603096  | -0.238552 | -2.847364 |
| C | 0.128577  | -4.867650 | -3.443124 |
| H | -0.548627 | -5.989867 | -1.715560 |
| H | 0.957771  | -3.582575 | -4.946238 |
| H | 2.429493  | -1.666752 | -4.467501 |
| H | -0.412927 | -5.486029 | -4.152052 |
| C | 0.068016  | -1.294442 | 0.813296  |
| H | 0.227015  | -1.192541 | -0.254282 |
| O | -0.351475 | -2.241162 | 3.516892  |
| H | -1.429404 | -1.509063 | 2.131906  |

|   |           |           |           |
|---|-----------|-----------|-----------|
| C | 4.225938  | -4.111405 | 0.799069  |
| H | 4.209734  | -3.848520 | -0.257042 |
| H | 5.122915  | -3.658119 | 1.233262  |
| H | 4.316147  | -5.198649 | 0.878180  |
| C | 3.702172  | -0.434477 | -0.158080 |
| O | 4.317302  | -0.881282 | 0.813884  |
| N | 3.711588  | 0.876972  | -0.519966 |
| H | 2.999652  | 1.184736  | -1.170568 |
| C | 4.483988  | 1.906578  | 0.178322  |
| C | 3.638585  | 3.191094  | 0.251952  |
| H | 4.234144  | 3.983026  | 0.712515  |
| H | 3.382954  | 3.528664  | -0.763024 |
| O | 2.468508  | 3.037814  | 1.037201  |
| H | 1.779873  | 2.671642  | 0.456650  |
| C | 5.896639  | 2.118891  | -0.468429 |
| C | 6.735309  | 3.056202  | 0.424276  |
| H | 6.330331  | 4.071336  | 0.464596  |
| H | 6.796648  | 2.673359  | 1.449353  |
| H | 7.755882  | 3.129587  | 0.034003  |
| C | 5.776658  | 2.715868  | -1.883682 |
| H | 5.375390  | 3.733892  | -1.870979 |
| H | 6.761971  | 2.757774  | -2.359966 |
| H | 5.127050  | 2.100456  | -2.515656 |
| C | 6.632210  | 0.767589  | -0.564444 |
| H | 6.126467  | 0.084355  | -1.252179 |
| H | 7.649559  | 0.924194  | -0.939164 |
| H | 6.690095  | 0.276731  | 0.410486  |
| N | -1.213156 | -1.190040 | 1.183657  |
| C | -2.239597 | -0.739586 | 0.274701  |
| C | -3.455426 | -1.661645 | 0.379046  |
| O | -3.593202 | -2.511570 | 1.236157  |

|   |           |           |           |
|---|-----------|-----------|-----------|
| O | -4.307811 | -1.361953 | -0.602404 |
| C | -5.585816 | -2.089421 | -0.805660 |
| C | -6.471922 | -1.941817 | 0.431274  |
| H | -6.043365 | -2.461827 | 1.288099  |
| H | -6.596845 | -0.886355 | 0.686528  |
| H | -7.457666 | -2.364982 | 0.216747  |
| C | -6.182156 | -1.359283 | -2.007668 |
| H | -5.501803 | -1.411276 | -2.862175 |
| H | -7.134679 | -1.817947 | -2.286072 |
| H | -6.357047 | -0.306518 | -1.767945 |
| C | -5.274418 | -3.548647 | -1.138439 |
| H | -6.200821 | -4.064279 | -1.407504 |
| H | -4.588677 | -3.603996 | -1.989028 |
| H | -4.824815 | -4.057593 | -0.284991 |
| P | -0.681264 | 2.097110  | -1.032225 |
| O | 0.811123  | 1.752433  | -0.910740 |
| C | -0.860088 | 3.877842  | -1.284450 |
| C | 0.179401  | 4.584508  | -1.908074 |
| C | -2.023278 | 4.549860  | -0.882535 |
| C | 0.049900  | 5.954154  | -2.134653 |
| H | 1.085072  | 4.061523  | -2.198531 |
| C | -2.149303 | 5.919620  | -1.115967 |
| H | -2.810826 | 4.006263  | -0.370022 |
| C | -1.115160 | 6.619989  | -1.742526 |
| H | 0.856647  | 6.502118  | -2.611397 |
| H | -3.047942 | 6.440773  | -0.801082 |
| H | -1.213755 | 7.686816  | -1.918817 |
| C | -1.428063 | 1.193096  | -2.412247 |
| C | -0.730891 | 0.092881  | -2.934429 |
| C | -2.713356 | 1.497681  | -2.884639 |
| C | -1.331908 | -0.717857 | -3.898047 |

|   |           |           |           |
|---|-----------|-----------|-----------|
| H | 0.272815  | -0.123767 | -2.583398 |
| C | -3.307645 | 0.685438  | -3.850204 |
| H | -3.248519 | 2.361014  | -2.500078 |
| C | -2.621809 | -0.426388 | -4.348676 |
| H | -0.796860 | -1.578426 | -4.285424 |
| H | -4.305137 | 0.916534  | -4.209778 |
| H | -3.091911 | -1.061628 | -5.093002 |
| N | -1.578525 | 1.697708  | 0.302132  |
| C | -2.689763 | 0.756361  | 0.434264  |
| C | -3.426881 | 0.980866  | 1.741107  |
| C | -2.767289 | 0.904850  | 2.977186  |
| C | -4.804865 | 1.227919  | 1.718108  |
| C | -3.482109 | 1.071735  | 4.163906  |
| H | -1.698461 | 0.726626  | 3.020172  |
| C | -5.519537 | 1.390549  | 2.906744  |
| H | -5.320673 | 1.292546  | 0.764216  |
| C | -4.858530 | 1.311658  | 4.133802  |
| H | -2.960289 | 1.013315  | 5.114581  |
| H | -6.587942 | 1.581450  | 2.871628  |
| H | -5.410679 | 1.439148  | 5.060144  |
| H | -1.858300 | -0.843693 | -0.744820 |
| C | 3.705240  | -4.767716 | 3.494075  |
| H | 3.730262  | -5.755988 | 3.033564  |
| H | 4.698675  | -4.320931 | 3.457173  |
| H | 3.387169  | -4.858177 | 4.529634  |
| H | -3.398595 | 0.915787  | -0.380971 |
| O | 1.071601  | 0.180836  | 1.203302  |
| H | 0.987923  | 0.795907  | 0.430865  |
| H | 0.778888  | 0.680852  | 2.075086  |
| C | 0.228065  | 2.594970  | 3.230161  |
| O | -0.381508 | 3.159445  | 2.292292  |

|   |           |          |          |
|---|-----------|----------|----------|
| O | 0.564091  | 3.361291 | 4.320595 |
| H | 0.229934  | 4.251177 | 4.131702 |
| O | 0.573893  | 1.382290 | 3.335969 |
| H | -1.232259 | 2.169107 | 1.160630 |
| H | 4.632924  | 1.545335 | 1.201366 |

Vibrational frequencies

|           |          |          |
|-----------|----------|----------|
| -222.3683 | 11.5683  | 17.5616  |
| 19.8772   | 24.1857  | 27.2508  |
| 29.7147   | 34.1107  | 35.4778  |
| 39.0207   | 41.6953  | 43.1393  |
| 44.5859   | 46.2443  | 48.7476  |
| 51.8566   | 55.6084  | 59.3709  |
| 64.8624   | 69.7983  | 75.3185  |
| 77.2743   | 83.6450  | 84.9675  |
| 88.2414   | 94.1520  | 97.7496  |
| 103.3133  | 106.5931 | 112.4926 |
| 112.7728  | 118.5457 | 120.4978 |
| 127.1182  | 133.4140 | 137.6214 |
| 148.6744  | 152.0656 | 165.4827 |
| 174.5699  | 175.5585 | 179.8179 |
| 189.4060  | 189.6906 | 194.4236 |
| 214.9841  | 218.6848 | 221.7736 |
| 227.0523  | 231.8567 | 234.7630 |
| 235.7446  | 247.4680 | 254.3736 |
| 259.5316  | 262.2583 | 272.0054 |
| 276.2729  | 281.0602 | 287.0695 |
| 291.1625  | 291.7749 | 306.2434 |
| 312.9772  | 317.0283 | 322.7824 |
| 329.7649  | 331.1994 | 344.7256 |
| 348.6434  | 357.7017 | 365.5486 |

|          |          |          |
|----------|----------|----------|
| 374.2518 | 377.3702 | 385.3489 |
| 389.2958 | 396.3698 | 401.5028 |
| 407.0079 | 408.1521 | 410.5603 |
| 412.7327 | 427.4555 | 429.9923 |
| 430.9224 | 440.5117 | 443.0323 |
| 446.2042 | 464.6328 | 472.2273 |
| 480.9426 | 487.4169 | 490.9764 |
| 495.5292 | 507.3233 | 513.0223 |
| 526.0552 | 529.9734 | 536.9792 |
| 542.8972 | 549.3604 | 550.9127 |
| 559.6574 | 564.5913 | 573.1109 |
| 582.7149 | 591.0374 | 592.5988 |
| 601.4866 | 613.7251 | 622.6269 |
| 629.0458 | 629.5680 | 632.8482 |
| 638.9593 | 653.3791 | 658.1473 |
| 666.9639 | 675.3698 | 691.3776 |
| 703.0302 | 709.1302 | 715.3398 |
| 722.2404 | 736.8779 | 741.7766 |
| 746.0538 | 751.4024 | 759.6337 |
| 763.9572 | 769.7865 | 773.2936 |
| 778.7473 | 782.4881 | 784.7488 |
| 788.7076 | 791.9808 | 800.2966 |
| 802.1713 | 807.8119 | 810.9897 |
| 816.4411 | 831.2439 | 838.5411 |
| 849.7006 | 853.0304 | 855.0917 |
| 872.5656 | 876.6950 | 880.7230 |
| 887.9924 | 890.9407 | 897.9584 |
| 907.1849 | 912.5390 | 921.0803 |
| 937.7033 | 939.6322 | 946.3774 |
| 949.5555 | 952.5127 | 956.8666 |
| 957.6301 | 958.2589 | 973.8805 |

|           |           |           |
|-----------|-----------|-----------|
| 975.4383  | 982.0041  | 983.8767  |
| 989.3299  | 994.7466  | 998.1251  |
| 999.4436  | 1000.2640 | 1009.3500 |
| 1010.8977 | 1012.1346 | 1013.4645 |
| 1016.4053 | 1018.4244 | 1019.6561 |
| 1023.6645 | 1029.6457 | 1033.0291 |
| 1049.3613 | 1051.4958 | 1053.7989 |
| 1054.3450 | 1057.9418 | 1060.4638 |
| 1063.0211 | 1067.9843 | 1072.2224 |
| 1077.5392 | 1081.6165 | 1090.7447 |
| 1102.7397 | 1105.3084 | 1108.3321 |
| 1113.4506 | 1114.1796 | 1126.5543 |
| 1131.6531 | 1139.8215 | 1142.4352 |
| 1145.3542 | 1146.8739 | 1150.2617 |
| 1157.5402 | 1182.7230 | 1187.9241 |
| 1189.8648 | 1190.8365 | 1192.1633 |
| 1194.8758 | 1196.2350 | 1203.9234 |
| 1210.1552 | 1212.4208 | 1214.7638 |
| 1216.5953 | 1218.5635 | 1223.9324 |
| 1227.8041 | 1245.6617 | 1249.0242 |
| 1250.3621 | 1255.1072 | 1267.4794 |
| 1269.2860 | 1271.1091 | 1279.1617 |
| 1287.2058 | 1291.2815 | 1293.2789 |
| 1311.3634 | 1324.7188 | 1329.7203 |
| 1332.9552 | 1335.7539 | 1336.8475 |
| 1339.6777 | 1355.9676 | 1359.6954 |
| 1361.8926 | 1366.8418 | 1371.3686 |
| 1389.3527 | 1391.7137 | 1398.0719 |
| 1407.5785 | 1409.2273 | 1411.1428 |
| 1412.6891 | 1414.3793 | 1414.8340 |
| 1416.8572 | 1425.4512 | 1429.9073 |

|           |           |           |
|-----------|-----------|-----------|
| 1432.0171 | 1437.4960 | 1440.7181 |
| 1445.7223 | 1450.0225 | 1453.7001 |
| 1465.8481 | 1475.5863 | 1477.8541 |
| 1478.3295 | 1478.8258 | 1481.4809 |
| 1485.9028 | 1487.6735 | 1493.5738 |
| 1493.6060 | 1494.9863 | 1496.0639 |
| 1501.2422 | 1501.3728 | 1502.5749 |
| 1506.8592 | 1508.7225 | 1510.6844 |
| 1510.7695 | 1518.2154 | 1521.2480 |
| 1522.9961 | 1523.6209 | 1527.0197 |
| 1529.7981 | 1531.4368 | 1543.2138 |
| 1552.2090 | 1560.2219 | 1563.5831 |
| 1581.2483 | 1600.9235 | 1614.3141 |
| 1625.2591 | 1627.5544 | 1637.4071 |
| 1643.2440 | 1644.1173 | 1646.6078 |
| 1648.8379 | 1658.9234 | 1671.2101 |
| 1680.3864 | 1697.9180 | 1725.9068 |
| 1794.4727 | 2364.3126 | 3009.7734 |
| 3035.3763 | 3038.1114 | 3046.2357 |
| 3052.8036 | 3055.5076 | 3057.5609 |
| 3065.0580 | 3076.7402 | 3087.3298 |
| 3090.9796 | 3096.1049 | 3103.6672 |
| 3104.6512 | 3106.6116 | 3114.8921 |
| 3115.1610 | 3115.1892 | 3116.6590 |
| 3121.7339 | 3128.6675 | 3131.2822 |
| 3133.6433 | 3135.8653 | 3141.2487 |
| 3160.1023 | 3166.9442 | 3174.2501 |
| 3175.2812 | 3180.7909 | 3184.0196 |
| 3187.5569 | 3187.9893 | 3188.2682 |
| 3191.5194 | 3194.5901 | 3195.7606 |
| 3196.4517 | 3196.6648 | 3198.3236 |



|           |           |           |
|-----------|-----------|-----------|
| 3200.9728 | 3202.2733 | 3205.9138 |
| 3207.8998 | 3208.1751 | 3209.9303 |
| 3211.9438 | 3214.7174 | 3215.1466 |
| 3216.4255 | 3220.9283 | 3224.7562 |
| 3251.2104 | 3301.5990 | 3407.0325 |
| 3593.7835 | 3686.5963 | 3792.8545 |

### TS7RR'

Zero-point correction= 1.030222

Thermal correction to Energy= 1.094116

Thermal correction to Enthalpy= 1.095060

Thermal correction to Gibbs Free Energy= 0.928579

Sum of electronic and zero-point Energies= -3290.965980

Sum of electronic and thermal Energies= -3290.902086

Sum of electronic and thermal Enthalpies= -3290.901142

Sum of electronic and thermal Free Energies= -3291.067623

### Cartesian coordinates

|   |           |           |           |
|---|-----------|-----------|-----------|
| C | -3.830119 | -0.813433 | -2.573283 |
| C | -2.491992 | -0.963129 | -2.108370 |
| C | -2.294931 | -0.534725 | -0.742377 |
| C | -3.312214 | 0.133571  | -0.045219 |
| C | -4.590129 | 0.272062  | -0.595138 |
| N | -4.805710 | -0.256485 | -1.836487 |
| H | -4.099528 | -1.204447 | -3.544374 |
| C | -2.995102 | 0.790509  | 1.267744  |
| C | -3.223339 | 0.136788  | 2.518092  |
| C | -2.394002 | 2.041251  | 1.243834  |
| C | -3.886858 | -1.117712 | 2.607544  |
| C | -2.783656 | 0.773173  | 3.727457  |
| C | -1.959135 | 2.659786  | 2.443752  |

|   |           |           |           |
|---|-----------|-----------|-----------|
| C | -4.089122 | -1.717703 | 3.830663  |
| H | -4.232949 | -1.599992 | 1.701866  |
| C | -3.002457 | 0.119713  | 4.970469  |
| C | -2.143662 | 2.038138  | 3.654391  |
| H | -1.479831 | 3.631852  | 2.390669  |
| C | -3.638838 | -1.099906 | 5.023120  |
| H | -4.599307 | -2.674986 | 3.881952  |
| H | -2.661138 | 0.604969  | 5.880727  |
| H | -1.808457 | 2.512487  | 4.572352  |
| H | -3.801521 | -1.589243 | 5.978685  |
| C | -1.073052 | -0.973753 | -0.034455 |
| H | -0.885035 | -0.534627 | 0.939527  |
| O | -1.592916 | -1.464088 | -2.852992 |
| H | -0.194114 | -1.493374 | -1.741155 |
| C | -5.711827 | 0.988216  | 0.096856  |
| H | -5.401627 | 1.270235  | 1.101168  |
| H | -5.977939 | 1.907135  | -0.436146 |
| H | -6.608176 | 0.367312  | 0.183295  |
| C | -2.240594 | 2.773136  | -0.064421 |
| O | -3.206794 | 2.985811  | -0.803781 |
| N | -0.973546 | 3.173717  | -0.337739 |
| H | -0.232469 | 2.835736  | 0.282974  |
| C | -0.615112 | 3.828475  | -1.597153 |
| C | 0.598035  | 3.088379  | -2.175130 |
| H | 0.828974  | 3.455520  | -3.175821 |
| H | 1.482348  | 3.254946  | -1.546460 |
| O | 0.348930  | 1.684491  | -2.317529 |
| H | -0.099818 | 1.370211  | -1.515976 |
| C | -0.425796 | 5.370405  | -1.443425 |
| C | -0.102642 | 5.986754  | -2.818974 |
| H | 0.883032  | 5.685439  | -3.186788 |

|   |           |           |           |
|---|-----------|-----------|-----------|
| H | -0.849310 | 5.700161  | -3.568400 |
| H | -0.102212 | 7.079432  | -2.748544 |
| C | 0.699392  | 5.703959  | -0.448798 |
| H | 1.678183  | 5.362293  | -0.795612 |
| H | 0.763751  | 6.787532  | -0.303427 |
| H | 0.513335  | 5.248389  | 0.528501  |
| C | -1.746382 | 5.975063  | -0.928925 |
| H | -2.000500 | 5.587040  | 0.061331  |
| H | -1.655936 | 7.063684  | -0.851364 |
| H | -2.577541 | 5.745064  | -1.602467 |
| N | 0.039283  | -1.183979 | -0.785620 |
| C | 1.259159  | -1.643727 | -0.164461 |
| C | 1.370796  | -3.174417 | -0.150257 |
| O | 0.510693  | -3.928013 | -0.579834 |
| O | 2.517621  | -3.528299 | 0.413630  |
| C | 2.903300  | -4.945749 | 0.658201  |
| C | 2.987742  | -5.691033 | -0.673112 |
| H | 2.002188  | -5.805222 | -1.124614 |
| H | 3.635113  | -5.152322 | -1.370110 |
| H | 3.414387  | -6.683126 | -0.499484 |
| C | 4.279027  | -4.791999 | 1.303354  |
| H | 4.211855  | -4.184170 | 2.209989  |
| H | 4.676425  | -5.776040 | 1.565799  |
| H | 4.975102  | -4.307232 | 0.612860  |
| C | 1.897417  | -5.566858 | 1.626180  |
| H | 2.235367  | -6.569812 | 1.902066  |
| H | 1.826038  | -4.963473 | 2.535764  |
| H | 0.909471  | -5.643152 | 1.170597  |
| P | 2.323313  | 1.284529  | 0.730792  |
| O | 0.890539  | 1.569005  | 1.147388  |
| C | 3.264970  | 2.819096  | 0.529584  |

|   |          |           |           |
|---|----------|-----------|-----------|
| C | 3.004345 | 3.864755  | 1.429386  |
| C | 4.244671 | 2.978536  | -0.461297 |
| C | 3.721975 | 5.056004  | 1.341683  |
| H | 2.229984 | 3.747088  | 2.181075  |
| C | 4.950039 | 4.179511  | -0.553767 |
| H | 4.438049 | 2.170135  | -1.158193 |
| C | 4.692638 | 5.214786  | 0.348320  |
| H | 3.516078 | 5.863539  | 2.037099  |
| H | 5.700173 | 4.305685  | -1.328254 |
| H | 5.245456 | 6.146406  | 0.275591  |
| C | 3.170826 | 0.243296  | 1.953607  |
| C | 2.424358 | -0.272570 | 3.021525  |
| C | 4.524816 | -0.098688 | 1.813764  |
| C | 3.023149 | -1.145677 | 3.931769  |
| H | 1.379629 | 0.005142  | 3.122934  |
| C | 5.117685 | -0.971776 | 2.724479  |
| H | 5.107390 | 0.305964  | 0.991093  |
| C | 4.365737 | -1.498954 | 3.779823  |
| H | 2.441999 | -1.550643 | 4.754182  |
| H | 6.162328 | -1.243584 | 2.611215  |
| H | 4.829489 | -2.181801 | 4.485067  |
| N | 2.545892 | 0.459083  | -0.725118 |
| C | 2.544781 | -1.008815 | -0.792111 |
| C | 2.794425 | -1.494481 | -2.210289 |
| C | 1.989617 | -1.100789 | -3.290723 |
| C | 3.838984 | -2.399993 | -2.440441 |
| C | 2.225641 | -1.613454 | -4.567596 |
| H | 1.180577 | -0.392502 | -3.148844 |
| C | 4.073153 | -2.912983 | -3.717172 |
| H | 4.471205 | -2.706006 | -1.612286 |
| C | 3.263590 | -2.522130 | -4.785381 |

|   |           |           |           |
|---|-----------|-----------|-----------|
| H | 1.593317  | -1.301550 | -5.393509 |
| H | 4.887868  | -3.613272 | -3.875220 |
| H | 3.441979  | -2.919385 | -5.780055 |
| H | 1.236800  | -1.347517 | 0.888322  |
| C | -6.176155 | -0.274246 | -2.390666 |
| H | -6.778006 | -0.972937 | -1.807964 |
| H | -6.610659 | 0.723400  | -2.351666 |
| H | -6.132906 | -0.609023 | -3.423921 |
| H | 3.367177  | -1.365749 | -0.173637 |
| O | -1.614527 | -2.573106 | 0.616110  |
| H | -1.134803 | -3.200159 | 0.035706  |
| H | -2.693498 | -2.789583 | 0.424517  |
| C | -4.062557 | -3.610009 | -0.986890 |
| O | -3.175593 | -4.189179 | -1.621607 |
| O | -5.337353 | -3.521328 | -1.508160 |
| H | -5.304025 | -3.979063 | -2.361591 |
| O | -3.967902 | -3.035687 | 0.155263  |
| H | 2.000518  | 0.883858  | -1.478352 |
| H | -1.460524 | 3.662256  | -2.272313 |

#### Vibrational frequencies

|           |          |          |
|-----------|----------|----------|
| -389.0714 | 15.0637  | 18.3859  |
| 23.3266   | 25.5397  | 26.9372  |
| 31.1944   | 32.9115  | 39.5164  |
| 42.1765   | 43.1735  | 44.6532  |
| 45.9505   | 50.4316  | 51.6511  |
| 55.1042   | 57.3469  | 58.1405  |
| 60.4189   | 66.5762  | 72.7449  |
| 73.9593   | 82.5216  | 83.5329  |
| 84.8586   | 88.2164  | 94.3162  |
| 105.6030  | 113.4035 | 116.0461 |

|          |          |          |
|----------|----------|----------|
| 120.2530 | 124.0073 | 126.2238 |
| 132.5477 | 139.3229 | 146.4531 |
| 154.0250 | 156.1111 | 158.4381 |
| 170.0513 | 174.9823 | 178.1182 |
| 182.9726 | 188.2631 | 195.8578 |
| 207.5714 | 213.9677 | 220.7186 |
| 226.6621 | 230.5291 | 232.3723 |
| 234.4797 | 242.9121 | 247.0584 |
| 247.5824 | 255.4038 | 264.6060 |
| 267.1160 | 279.5714 | 288.1148 |
| 293.8786 | 295.3163 | 304.5497 |
| 309.6837 | 314.5791 | 320.1943 |
| 331.7148 | 338.0277 | 344.9148 |
| 354.5186 | 366.0494 | 368.0254 |
| 384.4808 | 385.9637 | 391.1132 |
| 399.8488 | 402.2399 | 403.4545 |
| 409.6537 | 411.6807 | 413.7355 |
| 415.1346 | 416.7432 | 419.6835 |
| 430.5338 | 440.1515 | 441.7659 |
| 455.5938 | 463.3784 | 468.9851 |
| 473.2634 | 482.9552 | 486.8121 |
| 492.3242 | 503.4257 | 514.6489 |
| 519.7437 | 522.1244 | 530.6025 |
| 535.5720 | 551.3735 | 553.0321 |
| 557.2608 | 563.4497 | 575.7556 |
| 582.2077 | 588.6266 | 600.8614 |
| 604.3046 | 619.6812 | 628.7426 |
| 629.4063 | 632.7519 | 639.3783 |
| 649.1663 | 662.9771 | 676.0310 |
| 690.3007 | 699.1259 | 702.3007 |
| 709.9589 | 711.6999 | 712.6222 |

|           |           |           |
|-----------|-----------|-----------|
| 715.4238  | 719.4917  | 737.0477  |
| 740.2656  | 743.2531  | 754.7179  |
| 762.4985  | 765.7487  | 769.8328  |
| 775.7706  | 777.9575  | 780.3092  |
| 791.8134  | 794.3682  | 801.3243  |
| 803.3263  | 804.0721  | 813.9966  |
| 827.6227  | 837.4115  | 843.5622  |
| 849.9255  | 851.0557  | 861.5605  |
| 873.3676  | 874.1185  | 880.6779  |
| 889.1086  | 897.2766  | 902.0395  |
| 906.4491  | 913.8934  | 931.9683  |
| 938.7550  | 941.9692  | 948.4781  |
| 950.8691  | 952.1628  | 952.5523  |
| 955.7510  | 957.3401  | 968.7031  |
| 975.9114  | 976.2946  | 980.8686  |
| 984.7109  | 990.3068  | 991.7741  |
| 996.8649  | 997.2693  | 1003.0183 |
| 1011.1247 | 1012.3592 | 1013.1798 |
| 1015.5319 | 1018.2755 | 1018.6866 |
| 1022.0161 | 1024.2437 | 1030.5877 |
| 1033.9513 | 1049.6018 | 1051.1398 |
| 1052.5479 | 1056.8506 | 1060.0325 |
| 1060.6331 | 1063.7957 | 1067.0530 |
| 1069.9161 | 1083.8289 | 1101.7565 |
| 1102.9489 | 1107.4484 | 1116.4110 |
| 1118.1332 | 1128.0160 | 1131.7680 |
| 1135.0248 | 1135.5204 | 1137.8509 |
| 1145.8761 | 1147.7720 | 1162.0668 |
| 1175.9974 | 1182.4437 | 1192.6343 |
| 1193.6936 | 1194.3118 | 1194.6292 |
| 1195.2333 | 1197.5630 | 1203.5629 |

|           |           |           |
|-----------|-----------|-----------|
| 1210.9353 | 1211.0604 | 1212.2085 |
| 1223.0493 | 1228.8731 | 1230.6577 |
| 1238.7945 | 1247.3103 | 1248.2922 |
| 1252.9809 | 1268.0774 | 1271.4590 |
| 1277.2624 | 1280.7034 | 1281.4790 |
| 1284.2637 | 1292.2108 | 1304.3493 |
| 1318.7517 | 1327.7074 | 1329.1697 |
| 1331.3476 | 1333.3853 | 1335.1736 |
| 1340.5803 | 1343.4063 | 1357.6419 |
| 1360.7958 | 1361.5413 | 1372.0474 |
| 1372.8268 | 1380.1962 | 1385.5660 |
| 1398.1912 | 1399.0620 | 1408.6845 |
| 1411.4965 | 1413.9390 | 1415.9049 |
| 1416.1252 | 1420.6654 | 1421.1582 |
| 1428.8008 | 1437.4161 | 1438.6454 |
| 1445.5067 | 1448.5263 | 1450.7646 |
| 1469.2618 | 1473.2956 | 1475.7446 |
| 1477.1096 | 1479.9963 | 1484.6062 |
| 1487.4172 | 1489.7364 | 1493.7551 |
| 1494.8484 | 1495.3917 | 1495.5621 |
| 1496.2037 | 1502.1980 | 1502.2467 |
| 1505.9178 | 1508.9387 | 1510.7502 |
| 1511.5579 | 1515.1429 | 1518.5568 |
| 1520.6024 | 1521.4369 | 1524.1704 |
| 1530.1836 | 1531.6121 | 1532.8500 |
| 1544.2960 | 1554.6181 | 1557.2556 |
| 1581.7008 | 1600.5270 | 1607.1652 |
| 1616.7544 | 1625.3246 | 1626.8793 |
| 1637.1552 | 1643.9509 | 1644.1514 |
| 1646.7892 | 1655.1262 | 1659.8949 |
| 1673.8818 | 1698.0360 | 1723.9567 |



|           |           |           |
|-----------|-----------|-----------|
| 1763.9033 | 1848.0720 | 3035.6281 |
| 3039.6008 | 3042.7388 | 3049.2986 |
| 3053.0190 | 3054.1868 | 3058.6345 |
| 3064.8761 | 3082.5603 | 3094.0134 |
| 3094.0933 | 3105.7113 | 3110.8776 |
| 3112.6150 | 3114.1809 | 3116.4822 |
| 3126.7996 | 3130.1010 | 3130.2811 |
| 3131.7778 | 3135.9327 | 3136.9640 |
| 3140.9545 | 3141.3842 | 3161.1987 |
| 3166.8275 | 3177.0090 | 3181.3373 |
| 3182.4781 | 3182.8722 | 3186.6578 |
| 3186.8721 | 3188.2528 | 3189.4595 |
| 3191.2525 | 3191.8748 | 3194.9874 |
| 3198.1220 | 3198.6348 | 3202.8245 |
| 3204.1247 | 3205.6918 | 3205.8064 |
| 3206.8287 | 3207.7198 | 3208.6772 |
| 3211.0037 | 3215.4942 | 3216.6652 |
| 3217.3595 | 3231.6977 | 3255.6373 |
| 3273.2579 | 3387.9797 | 3438.2531 |
| 3588.2386 | 3753.9998 | 3797.0375 |

## **M7RR**

Zero-point correction= 1.033597

Thermal correction to Energy= 1.098013

Thermal correction to Enthalpy= 1.098957

Thermal correction to Gibbs Free Energy= 0.930555

Sum of electronic and zero-point Energies= -3290.979910

Sum of electronic and thermal Energies= -3290.915494

Sum of electronic and thermal Enthalpies= -3290.914550

Sum of electronic and thermal Free Energies= -3291.082952

Cartesian coordinates

|   |           |           |           |
|---|-----------|-----------|-----------|
| C | 1.402938  | -3.538395 | 3.574671  |
| C | 0.686684  | -2.386418 | 3.138985  |
| C | 0.909944  | -2.048078 | 1.753264  |
| C | 1.694642  | -2.847800 | 0.931633  |
| C | 2.358508  | -3.982752 | 1.434775  |
| N | 2.195402  | -4.269312 | 2.755553  |
| H | 1.328559  | -3.862902 | 4.603666  |
| C | 1.767396  | -2.563416 | -0.539450 |
| C | 0.823025  | -3.225944 | -1.391250 |
| C | 2.663281  | -1.652592 | -1.083031 |
| C | -0.189014 | -4.087033 | -0.878355 |
| C | 0.878831  | -3.009892 | -2.807912 |
| C | 2.704524  | -1.446988 | -2.490293 |
| C | -1.083830 | -4.706527 | -1.721712 |
| H | -0.263156 | -4.239429 | 0.191811  |
| C | -0.050676 | -3.676662 | -3.651045 |
| C | 1.854857  | -2.122439 | -3.330820 |
| H | 3.438868  | -0.762099 | -2.900534 |
| C | -1.013637 | -4.505630 | -3.121826 |
| H | -1.853135 | -5.351902 | -1.310714 |
| H | 0.010308  | -3.515167 | -4.723745 |
| H | 1.910258  | -1.970618 | -4.404840 |
| H | -1.723922 | -5.004462 | -3.773784 |
| C | 0.307297  | -0.774515 | 1.221670  |
| H | 0.467781  | -0.714266 | 0.146874  |
| O | -0.082299 | -1.731814 | 3.904392  |
| H | -1.437516 | -1.144519 | 2.258852  |
| C | 3.264137  | -4.845410 | 0.604661  |
| H | 3.257185  | -4.500107 | -0.427578 |
| H | 4.299491  | -4.798330 | 0.959978  |

|   |           |           |           |
|---|-----------|-----------|-----------|
| H | 2.956377  | -5.896056 | 0.609659  |
| C | 3.615039  | -0.880991 | -0.202943 |
| O | 4.206877  | -1.406558 | 0.743202  |
| N | 3.789103  | 0.416103  | -0.578175 |
| H | 3.100785  | 0.808678  | -1.207677 |
| C | 4.725337  | 1.334139  | 0.074180  |
| C | 4.078549  | 2.730436  | 0.156499  |
| H | 4.768140  | 3.408525  | 0.664185  |
| H | 3.926984  | 3.127467  | -0.858269 |
| O | 2.864780  | 2.748334  | 0.888481  |
| H | 2.158458  | 2.443565  | 0.286313  |
| C | 6.129057  | 1.339045  | -0.627061 |
| C | 7.106302  | 2.216449  | 0.182068  |
| H | 6.841266  | 3.277105  | 0.150968  |
| H | 7.140162  | 1.904343  | 1.232148  |
| H | 8.117995  | 2.123413  | -0.226538 |
| C | 6.031248  | 1.865462  | -2.071843 |
| H | 5.739667  | 2.919467  | -2.110166 |
| H | 7.001821  | 1.775098  | -2.571155 |
| H | 5.302959  | 1.288650  | -2.652039 |
| C | 6.691828  | -0.095494 | -0.664548 |
| H | 6.079404  | -0.749211 | -1.291229 |
| H | 7.704248  | -0.086217 | -1.082871 |
| H | 6.731015  | -0.534192 | 0.336107  |
| N | -1.089719 | -0.617864 | 1.466890  |
| C | -1.974760 | -0.472105 | 0.344181  |
| C | -3.066482 | -1.540283 | 0.315680  |
| O | -3.210672 | -2.398906 | 1.164990  |
| O | -3.815413 | -1.365082 | -0.778162 |
| C | -4.982645 | -2.214603 | -1.106269 |
| C | -6.018144 | -2.129747 | 0.015809  |

|   |           |           |           |
|---|-----------|-----------|-----------|
| H | -5.651095 | -2.602530 | 0.926943  |
| H | -6.255813 | -1.084899 | 0.233320  |
| H | -6.934421 | -2.636116 | -0.301867 |
| C | -5.500660 | -1.565540 | -2.389375 |
| H | -4.718637 | -1.554762 | -3.153999 |
| H | -6.359348 | -2.124907 | -2.770431 |
| H | -5.811313 | -0.534187 | -2.198828 |
| C | -4.502903 | -3.642705 | -1.362268 |
| H | -5.342979 | -4.253993 | -1.704724 |
| H | -3.730586 | -3.647320 | -2.135896 |
| H | -4.092560 | -4.084649 | -0.453404 |
| P | -0.421973 | 2.235827  | -0.938021 |
| O | 0.942799  | 1.575323  | -0.704407 |
| C | -0.210893 | 4.028921  | -1.048987 |
| C | 1.015030  | 4.529813  | -1.513716 |
| C | -1.240741 | 4.915055  | -0.701000 |
| C | 1.207400  | 5.905439  | -1.630362 |
| H | 1.812341  | 3.842675  | -1.776593 |
| C | -1.043252 | 6.291192  | -0.820285 |
| H | -2.179593 | 4.524803  | -0.322421 |
| C | 0.178229  | 6.785803  | -1.284507 |
| H | 2.158342  | 6.289807  | -1.985745 |
| H | -1.839214 | 6.976150  | -0.545201 |
| H | 0.329888  | 7.857281  | -1.373193 |
| C | -1.186476 | 1.584070  | -2.445967 |
| C | -0.665510 | 0.410191  | -3.005600 |
| C | -2.342854 | 2.167820  | -2.986029 |
| C | -1.311242 | -0.189444 | -4.088046 |
| H | 0.234064  | -0.030812 | -2.589999 |
| C | -2.981218 | 1.566638  | -4.069599 |
| H | -2.746098 | 3.080013  | -2.556072 |

|   |           |           |           |
|---|-----------|-----------|-----------|
| C | -2.469532 | 0.384530  | -4.615759 |
| H | -0.914614 | -1.106798 | -4.509145 |
| H | -3.878308 | 2.014883  | -4.484749 |
| H | -2.973968 | -0.085642 | -5.454363 |
| N | -1.596598 | 2.019156  | 0.223491  |
| C | -2.613702 | 0.957374  | 0.238135  |
| C | -3.620754 | 1.224095  | 1.340276  |
| C | -3.239848 | 1.268382  | 2.690651  |
| C | -4.969950 | 1.407105  | 1.012788  |
| C | -4.191167 | 1.496637  | 3.685621  |
| H | -2.204629 | 1.100382  | 2.962678  |
| C | -5.923357 | 1.629953  | 2.008650  |
| H | -5.275085 | 1.372573  | -0.029330 |
| C | -5.535259 | 1.677771  | 3.349021  |
| H | -3.880363 | 1.530021  | 4.725754  |
| H | -6.965270 | 1.769441  | 1.735949  |
| H | -6.273667 | 1.854627  | 4.125371  |
| H | -1.413724 | -0.615754 | -0.587446 |
| C | 2.901611  | -5.430819 | 3.336635  |
| H | 2.576630  | -6.347471 | 2.843008  |
| H | 3.977863  | -5.310288 | 3.208913  |
| H | 2.669062  | -5.490138 | 4.397013  |
| H | -3.142347 | 0.987410  | -0.714888 |
| O | 1.099151  | 0.310570  | 1.789134  |
| H | 1.181230  | 0.962848  | 1.066469  |
| H | 0.490987  | 0.999151  | 3.057624  |
| C | -0.129760 | 2.736278  | 3.592360  |
| O | -0.242938 | 3.216162  | 2.467848  |
| O | -0.378141 | 3.437248  | 4.712218  |
| H | -0.656284 | 4.324193  | 4.434623  |
| O | 0.222390  | 1.510461  | 3.896910  |

|   |           |          |          |
|---|-----------|----------|----------|
| H | -1.290772 | 2.351529 | 1.140374 |
| H | 4.861697  | 0.963485 | 1.095885 |

Vibrational frequencies

|          |          |          |
|----------|----------|----------|
| 12.2462  | 16.1761  | 21.4810  |
| 24.1650  | 26.2880  | 29.3158  |
| 33.5829  | 38.0349  | 39.7841  |
| 40.8112  | 42.9997  | 44.5748  |
| 47.4842  | 49.0306  | 53.7855  |
| 56.1173  | 59.5427  | 63.8523  |
| 68.5976  | 70.2241  | 75.1069  |
| 75.9405  | 77.7802  | 80.8698  |
| 91.0009  | 92.7967  | 100.2392 |
| 101.1678 | 102.5043 | 109.6658 |
| 113.0856 | 118.8383 | 122.4425 |
| 128.2061 | 136.3000 | 144.7167 |
| 157.1484 | 167.3806 | 168.7158 |
| 179.6190 | 181.8726 | 191.2282 |
| 194.4406 | 204.6819 | 216.7260 |
| 225.5072 | 227.8259 | 229.6060 |
| 235.3171 | 237.8666 | 240.9109 |
| 249.9880 | 251.8554 | 255.8570 |
| 262.8954 | 270.5134 | 271.4649 |
| 274.2960 | 278.5994 | 284.8609 |
| 286.9922 | 288.9882 | 308.0519 |
| 322.5927 | 326.2052 | 330.0500 |
| 333.4672 | 337.5279 | 339.8927 |
| 347.8243 | 359.2615 | 366.1730 |
| 368.5457 | 377.6625 | 385.3042 |
| 395.7972 | 400.1068 | 403.7173 |
| 407.1943 | 409.6302 | 415.5280 |

|          |           |           |
|----------|-----------|-----------|
| 421.5034 | 425.3319  | 428.3227  |
| 442.3133 | 444.2722  | 448.5115  |
| 464.9700 | 473.2569  | 480.4598  |
| 481.6558 | 482.7259  | 495.8589  |
| 505.2393 | 511.6287  | 522.1536  |
| 527.3083 | 533.7054  | 539.7603  |
| 548.7399 | 552.7694  | 554.1331  |
| 558.4614 | 565.2532  | 574.7382  |
| 579.5481 | 583.2411  | 585.6507  |
| 598.3272 | 611.7269  | 620.6984  |
| 629.9865 | 631.2081  | 634.0037  |
| 637.7033 | 642.6623  | 650.5319  |
| 662.6126 | 668.0132  | 678.7964  |
| 692.3927 | 702.9298  | 711.9592  |
| 713.1780 | 722.3419  | 737.0347  |
| 741.1407 | 751.0742  | 756.4984  |
| 764.2678 | 768.6551  | 770.3025  |
| 775.6920 | 778.9556  | 781.3897  |
| 782.5524 | 787.2949  | 797.3430  |
| 798.3252 | 801.6528  | 810.4211  |
| 819.6933 | 824.1243  | 839.0943  |
| 850.6418 | 859.5944  | 872.5704  |
| 875.0716 | 876.4561  | 882.3427  |
| 890.8007 | 894.5974  | 897.6335  |
| 913.2940 | 920.2001  | 937.7425  |
| 940.6102 | 942.8200  | 947.4705  |
| 950.4874 | 952.7017  | 954.8705  |
| 957.9408 | 959.0160  | 973.8977  |
| 974.2203 | 984.4237  | 986.9603  |
| 987.7732 | 995.6303  | 996.1512  |
| 998.6567 | 1002.2690 | 1008.3568 |

|           |           |           |
|-----------|-----------|-----------|
| 1012.6451 | 1013.1897 | 1014.3093 |
| 1017.1917 | 1019.1292 | 1020.0240 |
| 1020.3586 | 1023.3129 | 1032.1455 |
| 1044.7791 | 1049.7633 | 1050.7789 |
| 1052.4170 | 1053.1471 | 1056.7937 |
| 1059.2317 | 1062.8778 | 1070.3797 |
| 1081.0359 | 1081.6759 | 1093.4858 |
| 1102.3036 | 1104.4159 | 1108.5685 |
| 1114.2584 | 1126.6376 | 1127.1681 |
| 1127.5837 | 1137.9386 | 1138.4516 |
| 1143.6015 | 1144.7661 | 1171.8756 |
| 1177.8198 | 1185.5901 | 1190.5736 |
| 1192.7423 | 1194.5160 | 1194.6419 |
| 1199.8256 | 1207.5228 | 1208.4282 |
| 1211.7111 | 1213.9953 | 1214.3216 |
| 1215.2532 | 1216.0899 | 1223.6192 |
| 1245.3074 | 1248.4231 | 1253.3236 |
| 1256.9666 | 1265.8949 | 1270.0744 |
| 1273.7507 | 1280.1097 | 1284.1141 |
| 1286.5895 | 1292.3480 | 1298.9153 |
| 1309.1961 | 1329.2079 | 1330.1959 |
| 1333.9505 | 1336.6468 | 1339.3939 |
| 1341.4286 | 1358.5317 | 1358.9498 |
| 1361.7074 | 1362.9545 | 1370.0723 |
| 1386.7810 | 1389.0222 | 1394.9732 |
| 1408.6890 | 1410.3846 | 1412.3563 |
| 1413.2101 | 1414.9739 | 1415.2218 |
| 1416.9957 | 1428.0076 | 1428.7605 |
| 1435.1630 | 1437.8456 | 1446.5432 |
| 1449.3191 | 1458.8905 | 1467.0156 |
| 1476.1764 | 1477.4119 | 1478.1269 |



|           |           |           |
|-----------|-----------|-----------|
| 1480.4186 | 1481.5922 | 1482.7331 |
| 1485.8489 | 1488.9236 | 1489.5174 |
| 1494.1355 | 1495.2843 | 1496.3511 |
| 1500.4668 | 1502.4302 | 1503.1012 |
| 1504.3512 | 1508.9630 | 1510.6496 |
| 1512.3964 | 1512.5921 | 1518.2931 |
| 1519.4100 | 1522.9891 | 1524.5362 |
| 1525.8653 | 1531.0339 | 1533.2199 |
| 1537.9101 | 1546.8254 | 1552.1259 |
| 1561.6453 | 1571.5049 | 1577.2626 |
| 1615.0005 | 1626.5147 | 1627.9884 |
| 1635.7821 | 1642.0914 | 1644.4947 |
| 1644.6439 | 1646.3121 | 1658.2099 |
| 1671.1165 | 1727.4792 | 1764.4298 |
| 1787.3477 | 2834.3359 | 3005.0105 |
| 3035.1852 | 3038.8968 | 3046.2019 |
| 3046.2832 | 3051.0577 | 3051.4165 |
| 3058.5334 | 3064.0189 | 3071.6896 |
| 3087.2986 | 3101.4184 | 3104.3298 |
| 3106.3203 | 3108.1396 | 3115.6465 |
| 3115.9834 | 3121.4177 | 3125.2035 |
| 3129.2640 | 3132.3283 | 3133.3391 |
| 3134.1825 | 3138.6807 | 3139.7188 |
| 3159.8298 | 3165.2185 | 3168.6138 |
| 3174.3414 | 3179.6709 | 3183.1416 |
| 3186.5940 | 3188.0263 | 3188.6279 |
| 3188.7248 | 3195.7540 | 3195.8024 |
| 3197.3249 | 3198.4872 | 3198.5586 |
| 3204.9217 | 3207.2007 | 3208.9327 |
| 3209.8353 | 3210.2231 | 3211.6906 |
| 3213.1827 | 3216.6683 | 3223.2672 |

|           |           |           |
|-----------|-----------|-----------|
| 3224.7204 | 3228.1966 | 3245.5515 |
| 3441.8760 | 3567.0841 | 3583.3458 |
| 3601.9003 | 3629.9029 | 3793.2377 |

**M7RR'**

Zero-point correction= 1.033777

Thermal correction to Energy= 1.098124

Thermal correction to Enthalpy= 1.099068

Thermal correction to Gibbs Free Energy= 0.930928

Sum of electronic and zero-point Energies= -3290.978032

Sum of electronic and thermal Energies= -3290.913684

Sum of electronic and thermal Enthalpies= -3290.912740

Sum of electronic and thermal Free Energies= -3291.080881

Cartesian coordinates

|   |           |           |           |
|---|-----------|-----------|-----------|
| C | 3.061565  | -2.295708 | 3.055782  |
| C | 1.896073  | -1.545312 | 2.717635  |
| C | 1.545063  | -1.628072 | 1.322330  |
| C | 2.277185  | -2.397021 | 0.422252  |
| C | 3.400924  | -3.131785 | 0.842935  |
| N | 3.754524  | -3.032179 | 2.156808  |
| H | 3.437458  | -2.279835 | 4.069793  |
| C | 1.839142  | -2.449236 | -1.014731 |
| C | 0.715798  | -3.283537 | -1.346746 |
| C | 2.438994  | -1.679003 | -2.004962 |
| C | 0.002352  | -4.025898 | -0.363334 |
| C | 0.250364  | -3.332219 | -2.701656 |
| C | 1.995830  | -1.781590 | -3.352855 |
| C | -1.120158 | -4.751525 | -0.698193 |
| H | 0.333202  | -3.995582 | 0.667670  |
| C | -0.893958 | -4.112008 | -3.018402 |

|   |           |           |           |
|---|-----------|-----------|-----------|
| C | 0.933518  | -2.578295 | -3.692953 |
| H | 2.513735  | -1.195017 | -4.103106 |
| C | -1.573700 | -4.799599 | -2.037948 |
| H | -1.662387 | -5.290591 | 0.072197  |
| H | -1.228099 | -4.148629 | -4.051633 |
| H | 0.589646  | -2.627146 | -4.722146 |
| H | -2.455822 | -5.380626 | -2.288579 |
| C | 0.445353  | -0.729830 | 0.820663  |
| H | 0.253331  | -0.924904 | -0.233825 |
| O | 1.251652  | -0.859160 | 3.564558  |
| H | -0.727678 | -0.773538 | 2.508452  |
| C | 4.223864  | -3.993573 | -0.071606 |
| H | 3.791792  | -3.987627 | -1.070715 |
| H | 5.256304  | -3.636143 | -0.154964 |
| H | 4.261697  | -5.032709 | 0.271613  |
| C | 3.555762  | -0.675251 | -1.788981 |
| O | 4.472530  | -0.591467 | -2.615908 |
| N | 3.413441  | 0.130586  | -0.715344 |
| H | 2.581183  | 0.028401  | -0.151673 |
| C | 4.187635  | 1.328866  | -0.356092 |
| C | 4.027112  | 2.389791  | -1.457777 |
| H | 4.683856  | 3.240160  | -1.254053 |
| H | 4.321440  | 1.959755  | -2.423359 |
| O | 2.702288  | 2.914934  | -1.491789 |
| H | 2.060068  | 2.196055  | -1.628334 |
| C | 5.643073  | 1.065572  | 0.151087  |
| C | 6.017083  | 2.221678  | 1.103909  |
| H | 5.975996  | 3.193785  | 0.601530  |
| H | 5.342008  | 2.259751  | 1.966503  |
| H | 7.037130  | 2.088508  | 1.479292  |
| C | 6.679722  | 0.997915  | -0.985919 |

|   |           |           |           |
|---|-----------|-----------|-----------|
| H | 6.746596  | 1.949609  | -1.523902 |
| H | 7.671831  | 0.786860  | -0.570809 |
| H | 6.419689  | 0.220398  | -1.704361 |
| C | 5.666782  | -0.252572 | 0.947999  |
| H | 5.502924  | -1.113092 | 0.294032  |
| H | 6.637543  | -0.378981 | 1.438938  |
| H | 4.889375  | -0.265894 | 1.720266  |
| N | -0.775251 | -0.883391 | 1.504024  |
| C | -2.007304 | -0.616829 | 0.819329  |
| C | -3.082522 | -1.612163 | 1.268646  |
| O | -2.989818 | -2.326803 | 2.246285  |
| O | -4.116280 | -1.560688 | 0.417283  |
| C | -5.279905 | -2.470613 | 0.527446  |
| C | -5.999771 | -2.240221 | 1.856910  |
| H | -5.376127 | -2.537513 | 2.699700  |
| H | -6.263671 | -1.184464 | 1.966892  |
| H | -6.922390 | -2.828008 | 1.872867  |
| C | -6.148017 | -2.036786 | -0.652429 |
| H | -5.601714 | -2.150809 | -1.592207 |
| H | -7.053407 | -2.648511 | -0.692709 |
| H | -6.437986 | -0.987209 | -0.549583 |
| C | -4.799572 | -3.913145 | 0.356272  |
| H | -5.664678 | -4.579960 | 0.296499  |
| H | -4.222348 | -4.009482 | -0.568122 |
| H | -4.174782 | -4.221606 | 1.195064  |
| P | -1.162983 | 1.918808  | -1.294611 |
| O | 0.245889  | 1.356650  | -1.513101 |
| C | -1.209711 | 3.668751  | -1.747876 |
| C | -0.222786 | 4.170172  | -2.609902 |
| C | -2.220122 | 4.516994  | -1.269885 |
| C | -0.257082 | 5.509413  | -2.998420 |

|   |           |           |           |
|---|-----------|-----------|-----------|
| H | 0.580539  | 3.523436  | -2.944595 |
| C | -2.250872 | 5.853728  | -1.665793 |
| H | -2.961352 | 4.136297  | -0.574712 |
| C | -1.272281 | 6.348768  | -2.532288 |
| H | 0.511170  | 5.898857  | -3.659209 |
| H | -3.031193 | 6.509596  | -1.292528 |
| H | -1.295937 | 7.390818  | -2.836609 |
| C | -2.362877 | 0.963955  | -2.258835 |
| C | -1.921615 | -0.209907 | -2.886580 |
| C | -3.714021 | 1.335338  | -2.333311 |
| C | -2.832788 | -1.015986 | -3.570449 |
| H | -0.874253 | -0.487936 | -2.829685 |
| C | -4.617808 | 0.528790  | -3.022771 |
| H | -4.059400 | 2.246608  | -1.854777 |
| C | -4.178045 | -0.647977 | -3.637745 |
| H | -2.491478 | -1.931186 | -4.041981 |
| H | -5.663760 | 0.813188  | -3.076266 |
| H | -4.886155 | -1.276910 | -4.168524 |
| N | -1.738791 | 1.869344  | 0.269650  |
| C | -2.591263 | 0.847356  | 0.896673  |
| C | -2.890674 | 1.231805  | 2.331386  |
| C | -1.862361 | 1.539594  | 3.236017  |
| C | -4.214373 | 1.227035  | 2.788168  |
| C | -2.157721 | 1.838589  | 4.566567  |
| H | -0.829468 | 1.539856  | 2.907772  |
| C | -4.509663 | 1.520562  | 4.120696  |
| H | -5.017686 | 0.994454  | 2.094881  |
| C | -3.481200 | 1.828654  | 5.013634  |
| H | -1.351127 | 2.075898  | 5.253778  |
| H | -5.541960 | 1.513854  | 4.457565  |
| H | -3.708968 | 2.061052  | 6.049547  |

|   |           |           |           |
|---|-----------|-----------|-----------|
| H | -1.848099 | -0.825745 | -0.243389 |
| C | 4.965630  | -3.735417 | 2.631490  |
| H | 4.865624  | -4.807255 | 2.459394  |
| H | 5.838628  | -3.358166 | 2.097295  |
| H | 5.086028  | -3.551051 | 3.695998  |
| H | -3.532996 | 0.810754  | 0.344811  |
| O | 1.041538  | 0.613830  | 0.851424  |
| H | 0.760187  | 1.064073  | 0.010221  |
| H | 1.461001  | 1.553837  | 2.023642  |
| C | 1.245601  | 3.432747  | 2.247961  |
| O | 0.339714  | 3.573751  | 1.434657  |
| O | 1.797350  | 4.456362  | 2.918669  |
| H | 1.335690  | 5.262289  | 2.637872  |
| O | 1.815651  | 2.300962  | 2.607057  |
| H | -1.167061 | 2.430636  | 0.901349  |
| H | 3.635958  | 1.717786  | 0.506950  |

Vibrational frequencies

|          |          |          |
|----------|----------|----------|
| 13.1523  | 17.6834  | 21.5095  |
| 22.8976  | 27.2531  | 30.1707  |
| 32.7746  | 36.6868  | 37.3508  |
| 40.0214  | 43.9227  | 48.7049  |
| 51.1878  | 52.2998  | 54.9422  |
| 56.5782  | 59.6812  | 63.0178  |
| 65.6270  | 70.9223  | 74.8238  |
| 80.7234  | 81.3782  | 85.7531  |
| 88.3752  | 93.9809  | 95.4061  |
| 99.5331  | 103.9180 | 108.9448 |
| 112.1988 | 115.2584 | 117.1922 |
| 124.5925 | 128.2524 | 144.9889 |
| 146.7455 | 158.0658 | 172.1440 |

|          |          |          |
|----------|----------|----------|
| 174.0226 | 182.7739 | 187.4059 |
| 189.4531 | 207.2133 | 212.0556 |
| 221.8347 | 225.7109 | 230.2109 |
| 233.8282 | 237.7302 | 241.8110 |
| 243.5989 | 245.2392 | 253.5318 |
| 259.8823 | 265.5635 | 275.3246 |
| 285.1621 | 292.9653 | 295.6049 |
| 301.2507 | 304.2736 | 311.3342 |
| 317.7360 | 323.0986 | 331.0604 |
| 337.1890 | 339.0703 | 347.0287 |
| 351.9293 | 360.4001 | 365.3042 |
| 367.5289 | 380.2990 | 388.0111 |
| 390.7083 | 402.5265 | 407.0607 |
| 407.2915 | 408.7521 | 413.4172 |
| 421.1297 | 429.6197 | 436.0856 |
| 438.2240 | 442.1613 | 448.5267 |
| 470.4537 | 471.5391 | 474.7389 |
| 485.3063 | 492.8847 | 495.3668 |
| 512.0130 | 514.7163 | 521.8967 |
| 527.6426 | 534.9822 | 542.7301 |
| 546.1743 | 557.7215 | 558.2410 |
| 560.3566 | 570.8289 | 575.4838 |
| 583.1543 | 588.3033 | 601.4231 |
| 606.7458 | 608.8170 | 628.1850 |
| 629.7766 | 630.3031 | 633.3799 |
| 634.8091 | 639.8638 | 641.3487 |
| 658.6938 | 669.4532 | 683.1687 |
| 696.4444 | 703.4733 | 709.4819 |
| 711.8763 | 721.0136 | 734.3077 |
| 741.0320 | 749.3691 | 756.2178 |
| 763.5734 | 769.5994 | 770.8906 |

|           |           |           |
|-----------|-----------|-----------|
| 776.8546  | 779.5116  | 783.9791  |
| 788.1812  | 793.6233  | 796.7831  |
| 801.9099  | 815.5364  | 831.8722  |
| 834.7457  | 837.7898  | 848.4682  |
| 859.3269  | 863.8390  | 870.9339  |
| 871.5078  | 872.4724  | 873.9179  |
| 887.2957  | 890.3905  | 900.5682  |
| 913.1643  | 932.5770  | 937.2893  |
| 938.9329  | 942.9057  | 945.8363  |
| 951.3309  | 952.7306  | 955.0405  |
| 968.8866  | 969.2847  | 974.5094  |
| 978.2279  | 981.7047  | 984.6329  |
| 985.5142  | 989.1330  | 994.4606  |
| 995.2938  | 996.6163  | 1003.4637 |
| 1009.4932 | 1011.6170 | 1011.8750 |
| 1013.7607 | 1016.4214 | 1018.2938 |
| 1018.3941 | 1021.6887 | 1030.6336 |
| 1036.4604 | 1050.4904 | 1051.4364 |
| 1052.1950 | 1056.1441 | 1056.8826 |
| 1058.8411 | 1063.3944 | 1070.6091 |
| 1073.4978 | 1077.9589 | 1091.4058 |
| 1093.0714 | 1103.4784 | 1108.5477 |
| 1112.8711 | 1116.7529 | 1130.1931 |
| 1134.0026 | 1137.1023 | 1141.1042 |
| 1143.0654 | 1147.1560 | 1164.8208 |
| 1179.5002 | 1187.2619 | 1190.1304 |
| 1192.4536 | 1194.5233 | 1195.6313 |
| 1196.0543 | 1208.9135 | 1209.0735 |
| 1211.9126 | 1215.3082 | 1216.3676 |
| 1218.2107 | 1223.3128 | 1233.5013 |
| 1244.2224 | 1246.4321 | 1248.3811 |



|           |           |           |
|-----------|-----------|-----------|
| 1249.1023 | 1256.1867 | 1269.0725 |
| 1276.8951 | 1277.0809 | 1277.6950 |
| 1289.9438 | 1295.1056 | 1320.4344 |
| 1325.1739 | 1328.5288 | 1331.2361 |
| 1333.9685 | 1336.0708 | 1337.1995 |
| 1338.9439 | 1358.1837 | 1360.3329 |
| 1362.6473 | 1365.4291 | 1377.1766 |
| 1384.6099 | 1393.4546 | 1403.2192 |
| 1405.4823 | 1409.2664 | 1412.7057 |
| 1416.3715 | 1416.5194 | 1417.2413 |
| 1423.1770 | 1427.4683 | 1431.7348 |
| 1436.7872 | 1439.4755 | 1439.6862 |
| 1445.7115 | 1451.3723 | 1458.3455 |
| 1463.6325 | 1475.3672 | 1478.0984 |
| 1479.9278 | 1480.0133 | 1480.6040 |
| 1482.8113 | 1489.9347 | 1493.6986 |
| 1494.3604 | 1495.5901 | 1497.0499 |
| 1500.3055 | 1500.6976 | 1501.9033 |
| 1503.3227 | 1508.3930 | 1510.2452 |
| 1511.3249 | 1516.5354 | 1518.1197 |
| 1523.0113 | 1524.9932 | 1525.6189 |
| 1527.6560 | 1530.3621 | 1532.5843 |
| 1539.1950 | 1540.1001 | 1550.4026 |
| 1569.2483 | 1574.5608 | 1580.4626 |
| 1609.4765 | 1625.4741 | 1627.7920 |
| 1636.4550 | 1643.0529 | 1643.7349 |
| 1644.3060 | 1646.8180 | 1659.4970 |
| 1669.3395 | 1718.4310 | 1772.4345 |
| 1795.0723 | 2941.4682 | 3032.4893 |
| 3036.3484 | 3039.4652 | 3044.0812 |
| 3045.1998 | 3053.7511 | 3056.4244 |

|           |           |           |
|-----------|-----------|-----------|
| 3061.7197 | 3062.4506 | 3080.7039 |
| 3089.1332 | 3098.2162 | 3098.3373 |
| 3103.0000 | 3104.1072 | 3104.2791 |
| 3107.9653 | 3112.3890 | 3124.6059 |
| 3126.5061 | 3127.5501 | 3128.6851 |
| 3134.3989 | 3142.0639 | 3160.5537 |
| 3164.1759 | 3168.2992 | 3171.7272 |
| 3173.9656 | 3181.9491 | 3181.9689 |
| 3187.9301 | 3189.1874 | 3189.3553 |
| 3190.2945 | 3195.1365 | 3196.2419 |
| 3198.0197 | 3198.1406 | 3200.8812 |
| 3204.2512 | 3206.2611 | 3207.9695 |
| 3208.7905 | 3211.9126 | 3212.8588 |
| 3219.9714 | 3222.2233 | 3222.5508 |
| 3226.1318 | 3229.2198 | 3241.1678 |
| 3246.1656 | 3472.5837 | 3588.7023 |
| 3609.1541 | 3685.7296 | 3791.3041 |

### **TS8RR**

Zero-point correction= 1.032110

Thermal correction to Energy= 1.094936

Thermal correction to Enthalpy= 1.095880

Thermal correction to Gibbs Free Energy= 0.933114

Sum of electronic and zero-point Energies= -3290.985716

Sum of electronic and thermal Energies= -3290.922890

Sum of electronic and thermal Enthalpies= -3290.921946

Sum of electronic and thermal Free Energies= -3291.084712

### Cartesian coordinates

|   |           |          |           |
|---|-----------|----------|-----------|
| C | -0.638458 | 4.349598 | -2.806836 |
| C | -0.441878 | 2.939796 | -2.785815 |

|   |           |          |           |
|---|-----------|----------|-----------|
| C | 0.121465  | 2.430803 | -1.552396 |
| C | 0.349646  | 3.275834 | -0.469456 |
| C | 0.157438  | 4.671762 | -0.586278 |
| N | -0.327883 | 5.149778 | -1.765534 |
| H | -1.040173 | 4.822474 | -3.692418 |
| C | 0.708085  | 2.764076 | 0.896850  |
| C | -0.314600 | 2.792459 | 1.907563  |
| C | 1.976089  | 2.310692 | 1.228519  |
| C | -1.663749 | 3.150949 | 1.623763  |
| C | 0.023785  | 2.459827 | 3.261071  |
| C | 2.294017  | 1.973269 | 2.571912  |
| C | -2.610663 | 3.196206 | 2.623371  |
| H | -1.949050 | 3.387841 | 0.605431  |
| C | -0.977528 | 2.515200 | 4.266796  |
| C | 1.355893  | 2.079246 | 3.566547  |
| H | 3.304066  | 1.654246 | 2.806764  |
| C | -2.268695 | 2.877327 | 3.958734  |
| H | -3.630238 | 3.483229 | 2.388123  |
| H | -0.703975 | 2.263351 | 5.287180  |
| H | 1.617646  | 1.851553 | 4.595853  |
| H | -3.027045 | 2.916680 | 4.734251  |
| C | 0.511000  | 0.966500 | -1.551888 |
| H | 0.836067  | 0.635311 | -0.562897 |
| O | -0.762555 | 2.209266 | -3.769791 |
| C | 0.472137  | 5.647723 | 0.513904  |
| H | 1.044822  | 5.153495 | 1.296243  |
| H | 1.069139  | 6.488726 | 0.151149  |
| H | -0.436071 | 6.055620 | 0.973312  |
| C | 3.038784  | 2.141926 | 0.172454  |
| O | 3.310987  | 3.018263 | -0.648764 |
| N | 3.648847  | 0.925916 | 0.234509  |

|   |           |           |           |
|---|-----------|-----------|-----------|
| H | 3.207271  | 0.238797  | 0.835863  |
| C | 4.593856  | 0.440654  | -0.770984 |
| C | 4.254688  | -1.027939 | -1.104183 |
| H | 4.822633  | -1.336915 | -1.983137 |
| H | 4.541495  | -1.687369 | -0.275700 |
| O | 2.875960  | -1.233224 | -1.410006 |
| H | 2.375755  | -1.209624 | -0.557459 |
| C | 6.082169  | 0.646119  | -0.333058 |
| C | 6.375585  | -0.064308 | 1.002260  |
| H | 5.696864  | 0.281333  | 1.788516  |
| H | 6.282062  | -1.151961 | 0.924500  |
| H | 7.399462  | 0.152763  | 1.324119  |
| C | 6.347738  | 2.153758  | -0.159209 |
| H | 5.721370  | 2.581230  | 0.627830  |
| H | 7.395597  | 2.319822  | 0.113962  |
| H | 6.140554  | 2.701631  | -1.083175 |
| C | 7.023677  | 0.105623  | -1.427918 |
| H | 6.775484  | 0.528644  | -2.408106 |
| H | 8.059249  | 0.377861  | -1.199056 |
| H | 6.984649  | -0.985003 | -1.507360 |
| N | -0.681119 | 0.092440  | -1.893194 |
| C | -1.604523 | -0.025774 | -0.745131 |
| C | -2.948208 | 0.629149  | -1.061046 |
| O | -3.260960 | 1.033513  | -2.164109 |
| O | -3.699498 | 0.648211  | 0.038290  |
| C | -5.121838 | 1.078541  | 0.015225  |
| C | -5.910158 | 0.191957  | -0.949921 |
| H | -5.612065 | 0.368214  | -1.983531 |
| H | -5.751851 | -0.862720 | -0.710935 |
| H | -6.975950 | 0.416991  | -0.848592 |
| C | -5.550620 | 0.835262  | 1.460753  |

|   |           |           |           |
|---|-----------|-----------|-----------|
| H | -4.924661 | 1.409830  | 2.148325  |
| H | -6.592500 | 1.137570  | 1.595667  |
| H | -5.457311 | -0.225421 | 1.710667  |
| C | -5.194257 | 2.560270  | -0.353614 |
| H | -6.223608 | 2.911371  | -0.237494 |
| H | -4.553516 | 3.148952  | 0.307876  |
| H | -4.879946 | 2.723212  | -1.384804 |
| P | 0.536732  | -2.171810 | 1.054138  |
| O | 1.566769  | -1.047093 | 0.945855  |
| C | 1.378001  | -3.772795 | 0.936703  |
| C | 2.750825  | -3.815603 | 1.221341  |
| C | 0.699420  | -4.951311 | 0.593994  |
| C | 3.439975  | -5.026692 | 1.160889  |
| H | 3.270687  | -2.899218 | 1.481454  |
| C | 1.392263  | -6.160089 | 0.535768  |
| H | -0.357623 | -4.917731 | 0.352764  |
| C | 2.760550  | -6.198688 | 0.818852  |
| H | 4.503527  | -5.054798 | 1.376584  |
| H | 0.866689  | -7.070053 | 0.263279  |
| H | 3.297134  | -7.141394 | 0.769755  |
| C | -0.359394 | -2.051233 | 2.623191  |
| C | 0.069999  | -1.128553 | 3.583594  |
| C | -1.461331 | -2.880579 | 2.891376  |
| C | -0.603426 | -1.027408 | 4.802230  |
| H | 0.915540  | -0.487483 | 3.364186  |
| C | -2.131808 | -2.774234 | 4.108215  |
| H | -1.797253 | -3.596754 | 2.147789  |
| C | -1.703046 | -1.846453 | 5.063745  |
| H | -0.271988 | -0.307162 | 5.543131  |
| H | -2.987400 | -3.410712 | 4.311084  |
| H | -2.228317 | -1.763363 | 6.010369  |

|   |           |           |           |
|---|-----------|-----------|-----------|
| N | -0.641653 | -2.281908 | -0.108378 |
| C | -1.854057 | -1.475086 | -0.198376 |
| C | -2.927457 | -2.259374 | -0.937883 |
| C | -3.901409 | -2.933375 | -0.189384 |
| C | -2.967620 | -2.345784 | -2.335147 |
| C | -4.900584 | -3.675559 | -0.819858 |
| H | -3.881979 | -2.866062 | 0.894940  |
| C | -3.968900 | -3.085320 | -2.967921 |
| H | -2.222755 | -1.841366 | -2.938792 |
| C | -4.938064 | -3.750374 | -2.214438 |
| H | -5.650808 | -4.186955 | -0.224282 |
| H | -3.990445 | -3.139299 | -4.052238 |
| H | -5.717008 | -4.322120 | -2.709750 |
| H | -1.178133 | 0.531088  | 0.096036  |
| C | -0.541251 | 6.604314  | -1.931721 |
| H | -1.172513 | 6.979756  | -1.126576 |
| H | 0.418868  | 7.121916  | -1.916987 |
| H | -1.031040 | 6.779585  | -2.886361 |
| H | -2.225997 | -1.310818 | 0.814854  |
| O | 1.519967  | 0.800696  | -2.498859 |
| H | 2.055810  | 0.016744  | -2.228997 |
| H | -0.227621 | -0.947348 | -2.594700 |
| C | 0.488743  | -2.819314 | -3.356966 |
| O | 0.301841  | -3.545158 | -2.370774 |
| O | 1.092393  | -3.318950 | -4.464831 |
| H | 1.291089  | -4.249017 | -4.275166 |
| O | 0.164110  | -1.583312 | -3.509774 |
| H | -0.344389 | -2.748518 | -0.982683 |
| H | -1.155354 | 0.593740  | -2.664209 |
| H | 4.420765  | 1.043521  | -1.669387 |

## Vibrational frequencies

|           |          |          |
|-----------|----------|----------|
| -886.0466 | 14.6663  | 17.1644  |
| 23.1695   | 26.7926  | 29.0322  |
| 30.2736   | 36.3527  | 39.7387  |
| 42.8735   | 44.6772  | 48.9652  |
| 50.5651   | 52.9233  | 58.5844  |
| 60.4574   | 63.2409  | 65.0909  |
| 72.5600   | 77.6717  | 78.5884  |
| 81.6376   | 91.2270  | 92.9931  |
| 100.1228  | 101.4467 | 103.6215 |
| 107.4749  | 112.9248 | 121.4435 |
| 128.5872  | 135.2333 | 139.7776 |
| 141.1909  | 146.7668 | 154.9693 |
| 158.4860  | 160.6268 | 166.2533 |
| 179.3947  | 183.5699 | 189.3541 |
| 190.6137  | 210.2944 | 214.6686 |
| 219.3291  | 221.3160 | 228.7657 |
| 232.6956  | 236.9180 | 238.0979 |
| 242.4280  | 250.1962 | 254.3075 |
| 259.8610  | 266.2104 | 269.8000 |
| 278.0979  | 282.4623 | 285.2820 |
| 286.0885  | 288.6525 | 308.9679 |
| 317.5871  | 321.1965 | 332.8217 |
| 337.8021  | 341.3746 | 344.1462 |
| 349.8250  | 360.6232 | 367.3376 |
| 374.9535  | 384.8585 | 392.3047 |
| 396.1901  | 406.7219 | 410.2234 |
| 414.3172  | 417.0443 | 418.4495 |
| 421.2337  | 430.5083 | 438.7965 |
| 442.6646  | 444.4304 | 449.3518 |
| 454.3482  | 460.6961 | 468.7676 |

|           |           |           |
|-----------|-----------|-----------|
| 476.1245  | 483.8989  | 497.1444  |
| 501.6427  | 516.9341  | 520.7722  |
| 532.2753  | 537.6789  | 545.5142  |
| 553.5956  | 553.9003  | 560.8988  |
| 572.3891  | 578.3640  | 583.5304  |
| 592.5535  | 607.7744  | 616.5612  |
| 630.1487  | 630.8538  | 631.6202  |
| 636.6269  | 637.4309  | 646.6745  |
| 653.9600  | 668.6158  | 677.1852  |
| 689.4607  | 696.5503  | 706.4456  |
| 709.5831  | 714.0998  | 719.2260  |
| 736.3627  | 742.8530  | 746.6518  |
| 757.8487  | 761.0493  | 765.8723  |
| 770.2999  | 773.0562  | 779.2378  |
| 780.9501  | 783.7285  | 789.9980  |
| 794.6836  | 796.5051  | 797.6483  |
| 806.9670  | 818.4144  | 825.3294  |
| 831.5817  | 840.5539  | 853.3347  |
| 857.5686  | 867.9397  | 872.9586  |
| 875.3902  | 878.8972  | 886.9603  |
| 892.9784  | 895.9349  | 904.5916  |
| 913.8095  | 933.9424  | 937.9194  |
| 939.1444  | 940.8006  | 948.2111  |
| 949.0867  | 953.8748  | 957.2641  |
| 962.2672  | 964.2869  | 975.8061  |
| 975.8774  | 982.7746  | 986.1620  |
| 990.9089  | 993.7408  | 998.6524  |
| 1001.8248 | 1003.9294 | 1008.4413 |
| 1009.4374 | 1013.4436 | 1015.6687 |
| 1017.4765 | 1018.1690 | 1022.3064 |
| 1022.9128 | 1030.0994 | 1050.5446 |



|           |           |           |
|-----------|-----------|-----------|
| 1052.7890 | 1053.4562 | 1054.5675 |
| 1055.3910 | 1062.5811 | 1063.3469 |
| 1064.9745 | 1070.0054 | 1077.3897 |
| 1079.9075 | 1097.2844 | 1107.3450 |
| 1108.7827 | 1116.2723 | 1119.1274 |
| 1120.0461 | 1131.4575 | 1135.8123 |
| 1137.6604 | 1139.4128 | 1145.6973 |
| 1147.5273 | 1150.9332 | 1158.7695 |
| 1172.2820 | 1186.0511 | 1192.9922 |
| 1193.5573 | 1194.6069 | 1195.5657 |
| 1198.3219 | 1209.0682 | 1211.7429 |
| 1211.8921 | 1217.9182 | 1222.7599 |
| 1224.9327 | 1230.1485 | 1242.1744 |
| 1244.7235 | 1251.0639 | 1252.4271 |
| 1254.8687 | 1270.6296 | 1274.4952 |
| 1278.8076 | 1281.5345 | 1288.8420 |
| 1293.9325 | 1300.9383 | 1312.4448 |
| 1315.0020 | 1319.5873 | 1329.9232 |
| 1337.1520 | 1348.7361 | 1353.1158 |
| 1358.4792 | 1359.8075 | 1364.6222 |
| 1369.8193 | 1375.0296 | 1379.0644 |
| 1391.5225 | 1402.1861 | 1406.8133 |
| 1411.5300 | 1413.1777 | 1416.0549 |
| 1417.3090 | 1418.4394 | 1425.9882 |
| 1428.6326 | 1431.1892 | 1434.9952 |
| 1439.7363 | 1445.4696 | 1447.8510 |
| 1452.0864 | 1466.3302 | 1474.7216 |
| 1476.8033 | 1478.4049 | 1479.1543 |
| 1479.2695 | 1483.8347 | 1487.2909 |
| 1490.1315 | 1494.8225 | 1495.2766 |
| 1495.8114 | 1498.0647 | 1498.7957 |

|           |           |           |
|-----------|-----------|-----------|
| 1501.3697 | 1503.6974 | 1506.5725 |
| 1509.9816 | 1510.2790 | 1511.7231 |
| 1512.2855 | 1516.6483 | 1517.2708 |
| 1520.6569 | 1523.0144 | 1526.4551 |
| 1529.4085 | 1535.1810 | 1541.1074 |
| 1546.3215 | 1553.5562 | 1560.7414 |
| 1566.5778 | 1574.2732 | 1583.8312 |
| 1616.6476 | 1626.5611 | 1629.3314 |
| 1638.9696 | 1642.6013 | 1645.1326 |
| 1645.9500 | 1650.3651 | 1659.3543 |
| 1671.8961 | 1689.0493 | 1741.9801 |
| 1757.7110 | 1792.3915 | 3034.2588 |
| 3038.2524 | 3043.3912 | 3045.9415 |
| 3048.5206 | 3055.9924 | 3062.0886 |
| 3066.8919 | 3067.3174 | 3068.9650 |
| 3090.0518 | 3104.9932 | 3104.9986 |
| 3108.2678 | 3110.6912 | 3111.4550 |
| 3112.4609 | 3114.6614 | 3116.4719 |
| 3131.6148 | 3133.1218 | 3133.4756 |
| 3135.4884 | 3139.1323 | 3144.5729 |
| 3164.8753 | 3167.3570 | 3173.9401 |
| 3175.6536 | 3177.7522 | 3179.4170 |
| 3185.9675 | 3187.1362 | 3187.8102 |
| 3187.8710 | 3189.0685 | 3195.8213 |
| 3196.4747 | 3197.3234 | 3197.8898 |
| 3199.8618 | 3204.1297 | 3205.8342 |
| 3208.4526 | 3208.7599 | 3210.0694 |
| 3211.4497 | 3214.1294 | 3217.0165 |
| 3220.8207 | 3231.1807 | 3232.9703 |
| 3247.6244 | 3264.6254 | 3329.1209 |
| 3412.9563 | 3557.7862 | 3790.4074 |

## M8RR

Zero-point correction= 1.035873

Thermal correction to Energy= 1.098942

Thermal correction to Enthalpy= 1.099887

Thermal correction to Gibbs Free Energy= 0.937008

Sum of electronic and zero-point Energies= -3290.987241

Sum of electronic and thermal Energies= -3290.924171

Sum of electronic and thermal Enthalpies= -3290.923227

Sum of electronic and thermal Free Energies= -3291.086106

### Cartesian coordinates

|   |           |           |           |
|---|-----------|-----------|-----------|
| C | 0.874172  | -4.235221 | -2.847601 |
| C | 0.609045  | -2.839771 | -2.781646 |
| C | -0.001909 | -2.402953 | -1.547603 |
| C | -0.202754 | -3.286738 | -0.490508 |
| C | 0.059852  | -4.665094 | -0.649776 |
| N | 0.584163  | -5.080454 | -1.837473 |
| H | 1.312310  | -4.658809 | -3.740639 |
| C | -0.589743 | -2.822773 | 0.884460  |
| C | 0.431111  | -2.828895 | 1.896993  |
| C | -1.874320 | -2.419299 | 1.216710  |
| C | 1.791959  | -3.140197 | 1.613644  |
| C | 0.077645  | -2.521375 | 3.252458  |
| C | -2.206606 | -2.104433 | 2.561971  |
| C | 2.737014  | -3.165040 | 2.615788  |
| H | 2.087113  | -3.358780 | 0.594031  |
| C | 1.077133  | -2.555639 | 4.260857  |
| C | -1.266654 | -2.185868 | 3.557281  |
| H | -3.227781 | -1.824365 | 2.798216  |
| C | 2.380377  | -2.872017 | 3.953368  |

|   |           |           |           |
|---|-----------|-----------|-----------|
| H | 3.766257  | -3.416129 | 2.380813  |
| H | 0.792031  | -2.325420 | 5.283134  |
| H | -1.537603 | -1.974552 | 4.587636  |
| H | 3.136968  | -2.895434 | 4.731161  |
| C | -0.485519 | -0.972044 | -1.522477 |
| H | -0.797596 | -0.645292 | -0.527928 |
| O | 0.915073  | -2.052727 | -3.730438 |
| C | -0.219389 | -5.688125 | 0.415714  |
| H | -0.826491 | -5.246265 | 1.203535  |
| H | -0.769178 | -6.545906 | 0.019680  |
| H | 0.702706  | -6.063257 | 0.875035  |
| C | -2.935706 | -2.286244 | 0.155390  |
| O | -3.144996 | -3.157978 | -0.688950 |
| N | -3.615430 | -1.108654 | 0.231097  |
| H | -3.223895 | -0.407559 | 0.850087  |
| C | -4.564989 | -0.659670 | -0.788376 |
| C | -4.308149 | 0.833848  | -1.073724 |
| H | -4.894906 | 1.142179  | -1.940308 |
| H | -4.626030 | 1.448451  | -0.222404 |
| O | -2.942936 | 1.119671  | -1.376309 |
| H | -2.437760 | 1.122354  | -0.525592 |
| C | -6.047900 | -0.974115 | -0.402264 |
| C | -6.436434 | -0.298058 | 0.926513  |
| H | -5.760736 | -0.601362 | 1.732831  |
| H | -6.418965 | 0.794176  | 0.858513  |
| H | -7.452129 | -0.590797 | 1.212640  |
| C | -6.212350 | -2.498314 | -0.245835 |
| H | -5.597042 | -2.883494 | 0.571268  |
| H | -7.257725 | -2.740094 | -0.024785 |
| H | -5.918871 | -3.024611 | -1.158585 |
| C | -6.987246 | -0.493216 | -1.526388 |

|   |           |           |           |
|---|-----------|-----------|-----------|
| H | -6.677287 | -0.891384 | -2.499351 |
| H | -8.008153 | -0.838736 | -1.333910 |
| H | -7.022624 | 0.597790  | -1.600060 |
| N | 0.691304  | -0.046113 | -1.887728 |
| C | 1.635264  | 0.132985  | -0.754962 |
| C | 3.001586  | -0.450497 | -1.106083 |
| O | 3.320180  | -0.794738 | -2.226636 |
| O | 3.748960  | -0.483229 | -0.007621 |
| C | 5.171456  | -0.922472 | -0.030048 |
| C | 5.974438  | -0.031363 | -0.977754 |
| H | 5.685296  | -0.193872 | -2.016081 |
| H | 5.823105  | 1.021868  | -0.729506 |
| H | 7.037173  | -0.266382 | -0.867779 |
| C | 5.592687  | -0.706758 | 1.421653  |
| H | 4.953596  | -1.282525 | 2.095904  |
| H | 6.628887  | -1.027097 | 1.558381  |
| H | 5.514295  | 0.351138  | 1.687769  |
| C | 5.227277  | -2.398712 | -0.422109 |
| H | 6.254371  | -2.760150 | -0.319927 |
| H | 4.586736  | -2.992099 | 0.235184  |
| H | 4.905169  | -2.543375 | -1.453911 |
| P | -0.595579 | 2.143209  | 1.060394  |
| O | -1.576364 | 0.974680  | 0.937522  |
| C | -1.509821 | 3.706887  | 1.035319  |
| C | -2.883921 | 3.670084  | 1.312025  |
| C | -0.881502 | 4.934777  | 0.783224  |
| C | -3.625374 | 4.851641  | 1.331562  |
| H | -3.364291 | 2.716360  | 1.504695  |
| C | -1.625078 | 6.113603  | 0.807807  |
| H | 0.176255  | 4.963980  | 0.545301  |
| C | -2.995710 | 6.073049  | 1.080826  |

|   |           |           |           |
|---|-----------|-----------|-----------|
| H | -4.690299 | 4.818153  | 1.539621  |
| H | -1.138069 | 7.062641  | 0.606075  |
| H | -3.572198 | 6.993124  | 1.095116  |
| C | 0.338898  | 2.010281  | 2.607311  |
| C | -0.056440 | 1.066413  | 3.562009  |
| C | 1.431425  | 2.854779  | 2.867990  |
| C | 0.638246  | 0.962554  | 4.768352  |
| H | -0.893446 | 0.412338  | 3.347913  |
| C | 2.124341  | 2.744285  | 4.071887  |
| H | 1.745366  | 3.584849  | 2.127809  |
| C | 1.727191  | 1.798003  | 5.022691  |
| H | 0.332148  | 0.227410  | 5.505370  |
| H | 2.972959  | 3.392083  | 4.268053  |
| H | 2.269159  | 1.712585  | 5.959636  |
| N | 0.543135  | 2.333365  | -0.130308 |
| C | 1.802066  | 1.607515  | -0.240008 |
| C | 2.814300  | 2.430524  | -1.020907 |
| C | 3.887305  | 3.005720  | -0.328497 |
| C | 2.703236  | 2.641000  | -2.402060 |
| C | 4.840863  | 3.773084  | -0.999638 |
| H | 3.980046  | 2.845774  | 0.742339  |
| C | 3.659268  | 3.405082  | -3.073372 |
| H | 1.865235  | 2.232159  | -2.956201 |
| C | 4.730595  | 3.970274  | -2.377547 |
| H | 5.667907  | 4.209892  | -0.448134 |
| H | 3.564500  | 3.559833  | -4.144058 |
| H | 5.472382  | 4.562204  | -2.905208 |
| H | 1.247002  | -0.446112 | 0.088478  |
| C | 0.866766  | -6.518557 | -2.045902 |
| H | 1.497336  | -6.891187 | -1.239186 |
| H | -0.070015 | -7.076784 | -2.068780 |

|   |           |           |           |
|---|-----------|-----------|-----------|
| H | 1.383553  | -6.640169 | -2.994550 |
| H | 2.213232  | 1.470592  | 0.762041  |
| O | -1.490277 | -0.832168 | -2.460671 |
| H | -2.048808 | -0.055542 | -2.200976 |
| H | 0.272044  | 0.851389  | -2.294547 |
| C | -0.808486 | 2.999129  | -3.142381 |
| O | -0.526332 | 3.757147  | -2.181375 |
| O | -1.668315 | 3.491733  | -4.099770 |
| H | -1.904911 | 4.384820  | -3.807349 |
| O | -0.398443 | 1.829975  | -3.370122 |
| H | 0.220167  | 2.874127  | -0.967749 |
| H | 1.140968  | -0.526601 | -2.702160 |
| H | -4.327497 | -1.224553 | -1.696679 |

Vibrational frequencies

|          |          |          |
|----------|----------|----------|
| 13.8192  | 22.4590  | 25.1573  |
| 29.2328  | 30.8672  | 32.3344  |
| 37.0114  | 40.5288  | 41.8200  |
| 46.0590  | 48.7022  | 49.4450  |
| 55.5549  | 57.4099  | 57.8355  |
| 61.5702  | 65.5721  | 70.7249  |
| 75.6070  | 78.5217  | 87.3920  |
| 90.5869  | 96.1328  | 101.2812 |
| 102.7605 | 106.3671 | 110.0405 |
| 111.4558 | 119.6952 | 122.0932 |
| 131.3898 | 136.0535 | 141.6164 |
| 143.3504 | 150.9974 | 152.6633 |
| 159.4519 | 162.6116 | 171.3194 |
| 178.5588 | 181.4363 | 191.3357 |
| 195.0674 | 209.5645 | 221.9133 |
| 222.1374 | 226.1853 | 230.6994 |

|          |          |          |
|----------|----------|----------|
| 237.0305 | 238.7532 | 242.3846 |
| 251.1309 | 253.9763 | 260.8804 |
| 265.6554 | 269.9921 | 276.0088 |
| 281.5042 | 283.5115 | 286.6935 |
| 292.6753 | 307.4498 | 316.5409 |
| 322.7705 | 330.3388 | 333.0712 |
| 339.9097 | 344.0418 | 348.2198 |
| 356.8312 | 367.5825 | 369.8444 |
| 381.8626 | 390.1736 | 394.0076 |
| 402.5615 | 403.3024 | 408.6298 |
| 413.2608 | 417.1420 | 418.2096 |
| 419.3922 | 440.8305 | 443.7723 |
| 445.0171 | 447.6625 | 452.4977 |
| 458.8009 | 464.2030 | 474.8188 |
| 482.2597 | 490.6132 | 498.9311 |
| 514.8621 | 519.6333 | 531.7620 |
| 535.7662 | 543.9573 | 545.0679 |
| 553.2143 | 556.1002 | 569.6462 |
| 571.9937 | 579.3844 | 589.5717 |
| 597.9445 | 605.4763 | 611.1514 |
| 624.6494 | 629.5298 | 630.4497 |
| 632.3428 | 641.9096 | 654.8014 |
| 667.5281 | 668.3749 | 677.1247 |
| 695.3123 | 706.6364 | 708.9027 |
| 713.8382 | 718.0075 | 735.7641 |
| 736.8691 | 748.4513 | 756.6432 |
| 758.6077 | 762.4251 | 766.9937 |
| 770.9728 | 779.4236 | 780.2633 |
| 782.3376 | 789.7689 | 793.2039 |
| 797.2831 | 804.7386 | 806.8443 |
| 817.8783 | 830.2540 | 836.8887 |



|           |           |           |
|-----------|-----------|-----------|
| 850.9574  | 854.6737  | 864.7229  |
| 870.6538  | 871.4291  | 877.8474  |
| 885.4381  | 890.3597  | 896.1305  |
| 899.2238  | 905.9133  | 910.4924  |
| 918.8578  | 933.6022  | 938.1005  |
| 941.0018  | 947.0656  | 947.5989  |
| 950.3329  | 955.1510  | 961.2455  |
| 964.3835  | 974.5257  | 977.9112  |
| 979.8053  | 983.2079  | 989.5685  |
| 991.8750  | 993.2697  | 996.7551  |
| 1003.0365 | 1010.0068 | 1011.5239 |
| 1013.7429 | 1015.3185 | 1016.9421 |
| 1017.9325 | 1021.8348 | 1022.1858 |
| 1023.0049 | 1030.7345 | 1050.2924 |
| 1051.6653 | 1053.2677 | 1054.4567 |
| 1059.3640 | 1063.0051 | 1064.8811 |
| 1067.8698 | 1074.5147 | 1077.8135 |
| 1084.2867 | 1095.4654 | 1108.1307 |
| 1108.8800 | 1116.2983 | 1118.8342 |
| 1124.9227 | 1130.0144 | 1133.9337 |
| 1136.8585 | 1138.2542 | 1144.0720 |
| 1146.3928 | 1148.8177 | 1169.6497 |
| 1178.1603 | 1187.3018 | 1193.2539 |
| 1193.4548 | 1193.5051 | 1195.6213 |
| 1200.8466 | 1210.5310 | 1212.0119 |
| 1217.4557 | 1222.8066 | 1222.9464 |
| 1226.7685 | 1228.5344 | 1242.1310 |
| 1248.2413 | 1252.4140 | 1254.2266 |
| 1269.9403 | 1272.2740 | 1279.2840 |
| 1279.5821 | 1279.6919 | 1292.3545 |
| 1294.3487 | 1310.2066 | 1313.6172 |

|           |           |           |
|-----------|-----------|-----------|
| 1317.4417 | 1329.9420 | 1336.2809 |
| 1346.9332 | 1348.8777 | 1354.8283 |
| 1359.1292 | 1364.4537 | 1372.2791 |
| 1375.3296 | 1380.4142 | 1391.4645 |
| 1396.9473 | 1403.8728 | 1406.8369 |
| 1411.2512 | 1413.2703 | 1413.5460 |
| 1417.1281 | 1418.4753 | 1422.4428 |
| 1429.0106 | 1430.6852 | 1435.4892 |
| 1441.2510 | 1446.6682 | 1452.6813 |
| 1466.3131 | 1473.7372 | 1476.3345 |
| 1478.5398 | 1478.7969 | 1480.3057 |
| 1482.3156 | 1487.9857 | 1490.8572 |
| 1495.9714 | 1496.4349 | 1496.9864 |
| 1497.9722 | 1498.2565 | 1502.7415 |
| 1504.3622 | 1507.7337 | 1509.6727 |
| 1511.1103 | 1512.0720 | 1516.2113 |
| 1517.0209 | 1518.6904 | 1522.4250 |
| 1523.6679 | 1526.3048 | 1529.5347 |
| 1534.8877 | 1543.6478 | 1553.8674 |
| 1557.5271 | 1563.4598 | 1573.6507 |
| 1578.5051 | 1590.7856 | 1616.7086 |
| 1626.8025 | 1629.3386 | 1638.7751 |
| 1642.4584 | 1645.2091 | 1645.7215 |
| 1650.3604 | 1659.9130 | 1671.8776 |
| 1675.5087 | 1727.9965 | 1741.0662 |
| 1799.6186 | 2652.0864 | 2955.6100 |
| 3034.6766 | 3037.9600 | 3042.3959 |
| 3047.6542 | 3047.7847 | 3056.9553 |
| 3063.9146 | 3068.0730 | 3068.9039 |
| 3069.6644 | 3081.1456 | 3090.7017 |
| 3100.2698 | 3105.1918 | 3108.7399 |

|           |           |           |
|-----------|-----------|-----------|
| 3112.0322 | 3113.0010 | 3115.9111 |
| 3116.4887 | 3117.6347 | 3132.8905 |
| 3133.5327 | 3134.7634 | 3137.7326 |
| 3140.9881 | 3145.6938 | 3163.9435 |
| 3168.1007 | 3175.0674 | 3175.7132 |
| 3178.3096 | 3186.1361 | 3186.8483 |
| 3187.3126 | 3187.6583 | 3189.0166 |
| 3194.3762 | 3196.1506 | 3196.7723 |
| 3197.3575 | 3202.2048 | 3204.8293 |
| 3205.8441 | 3207.5667 | 3209.4255 |
| 3210.8520 | 3212.4312 | 3213.8942 |
| 3214.2486 | 3216.8815 | 3221.6634 |
| 3230.5830 | 3251.6784 | 3286.3136 |
| 3373.0061 | 3567.7934 | 3792.7246 |

### TS9RR

Zero-point correction= 1.003038

Thermal correction to Energy= 1.061958

Thermal correction to Enthalpy= 1.062903

Thermal correction to Gibbs Free Energy= 0.907519

Sum of electronic and zero-point Energies= -3026.431293

Sum of electronic and thermal Energies= -3026.372372

Sum of electronic and thermal Enthalpies= -3026.371428

Sum of electronic and thermal Free Energies= -3026.526812

### Cartesian coordinates

|   |          |           |          |
|---|----------|-----------|----------|
| C | 2.808987 | -3.519628 | 2.854983 |
| C | 1.965948 | -2.400302 | 2.748882 |
| C | 1.496549 | -2.090738 | 1.440380 |
| C | 1.892136 | -2.853848 | 0.342259 |
| C | 2.741335 | -3.957621 | 0.510159 |

|   |           |           |           |
|---|-----------|-----------|-----------|
| N | 3.160670  | -4.249817 | 1.773997  |
| H | 3.205186  | -3.820319 | 3.814424  |
| C | 1.445218  | -2.433390 | -1.023047 |
| C | 0.253527  | -2.973582 | -1.595266 |
| C | 2.139420  | -1.423080 | -1.670064 |
| C | -0.481018 | -4.028485 | -0.982870 |
| C | -0.219139 | -2.434749 | -2.839266 |
| C | 1.659659  | -0.893001 | -2.893677 |
| C | -1.624707 | -4.522535 | -1.571127 |
| H | -0.121125 | -4.463622 | -0.055025 |
| C | -1.403907 | -2.967395 | -3.413500 |
| C | 0.509337  | -1.386417 | -3.461953 |
| H | 2.208877  | -0.088374 | -3.370298 |
| C | -2.089219 | -3.990506 | -2.797394 |
| H | -2.173454 | -5.326486 | -1.091975 |
| H | -1.758162 | -2.554526 | -4.353671 |
| H | 0.143270  | -0.979306 | -4.400020 |
| H | -2.991092 | -4.390216 | -3.248410 |
| C | 0.616297  | -0.863279 | 1.297712  |
| O | 1.647268  | -1.678470 | 3.784592  |
| C | 3.241385  | -4.779027 | -0.638878 |
| H | 2.725165  | -4.485396 | -1.550807 |
| H | 4.311086  | -4.606443 | -0.794208 |
| H | 3.080472  | -5.849031 | -0.484229 |
| C | 3.411865  | -0.897933 | -1.047377 |
| O | 4.362896  | -1.655351 | -0.817870 |
| N | 3.387407  | 0.420140  | -0.764278 |
| H | 2.508917  | 0.924898  | -0.904916 |
| C | 4.480231  | 1.111129  | -0.081828 |
| C | 3.893497  | 1.847479  | 1.136200  |
| H | 4.672159  | 2.460890  | 1.598485  |

|   |           |           |           |
|---|-----------|-----------|-----------|
| H | 3.088915  | 2.525055  | 0.820509  |
| O | 3.438633  | 0.925623  | 2.119617  |
| H | 2.481537  | 0.788105  | 2.025742  |
| C | 5.321967  | 1.989886  | -1.060938 |
| C | 4.485788  | 3.149178  | -1.631347 |
| H | 3.592990  | 2.774552  | -2.143572 |
| H | 4.166588  | 3.842953  | -0.847693 |
| H | 5.071920  | 3.719478  | -2.359832 |
| C | 5.814579  | 1.105222  | -2.223139 |
| H | 4.978141  | 0.732857  | -2.821201 |
| H | 6.470156  | 1.681306  | -2.884764 |
| H | 6.372792  | 0.240014  | -1.851920 |
| C | 6.552912  | 2.552622  | -0.322400 |
| H | 7.133638  | 1.750101  | 0.146385  |
| H | 7.209115  | 3.071051  | -1.029400 |
| H | 6.279676  | 3.272760  | 0.454335  |
| N | -0.894066 | -1.354704 | 1.232758  |
| C | -1.827945 | -0.534003 | 0.393875  |
| C | -3.080952 | -1.389973 | 0.149356  |
| O | -3.167079 | -2.535221 | 0.550260  |
| O | -3.964985 | -0.696767 | -0.544112 |
| C | -5.290321 | -1.258127 | -0.963157 |
| C | -6.078660 | -1.692074 | 0.271073  |
| H | -5.611069 | -2.545524 | 0.762184  |
| H | -6.158361 | -0.871263 | 0.987528  |
| H | -7.087660 | -1.975858 | -0.041154 |
| C | -5.935123 | -0.060316 | -1.653321 |
| H | -5.315998 | 0.281642  | -2.486058 |
| H | -6.918698 | -0.344450 | -2.036024 |
| H | -6.060403 | 0.770216  | -0.953002 |
| C | -5.040010 | -2.404010 | -1.938223 |

|   |           |           |           |
|---|-----------|-----------|-----------|
| H | -5.995419 | -2.734435 | -2.355472 |
| H | -4.397515 | -2.071299 | -2.757256 |
| H | -4.563698 | -3.247868 | -1.438695 |
| P | -0.303652 | 2.408012  | -0.329704 |
| O | 0.814571  | 1.571345  | -0.920001 |
| C | 0.275519  | 4.039238  | 0.191094  |
| C | 1.334215  | 4.619285  | -0.524912 |
| C | -0.309185 | 4.733740  | 1.260681  |
| C | 1.808749  | 5.880656  | -0.168983 |
| H | 1.786284  | 4.077375  | -1.347436 |
| C | 0.169671  | 5.996781  | 1.611692  |
| H | -1.120911 | 4.279572  | 1.818770  |
| C | 1.226679  | 6.568923  | 0.899689  |
| H | 2.631518  | 6.323628  | -0.721377 |
| H | -0.278988 | 6.530871  | 2.443394  |
| H | 1.598299  | 7.550358  | 1.178090  |
| C | -1.668634 | 2.564257  | -1.513303 |
| C | -1.688678 | 1.687733  | -2.607565 |
| C | -2.721090 | 3.471404  | -1.317666 |
| C | -2.764662 | 1.711379  | -3.496353 |
| H | -0.863371 | 0.997618  | -2.754232 |
| C | -3.790995 | 3.492777  | -2.211047 |
| H | -2.705189 | 4.153492  | -0.472700 |
| C | -3.813969 | 2.611465  | -3.297360 |
| H | -2.782526 | 1.028726  | -4.340179 |
| H | -4.606215 | 4.193378  | -2.061257 |
| H | -4.650981 | 2.628748  | -3.988492 |
| N | -1.056402 | 1.795184  | 1.053097  |
| C | -2.183654 | 0.865711  | 0.988663  |
| C | -2.920559 | 0.761310  | 2.315652  |
| C | -2.261105 | 0.505518  | 3.527652  |

|   |           |           |           |
|---|-----------|-----------|-----------|
| C | -4.314984 | 0.903799  | 2.321693  |
| C | -2.988219 | 0.372800  | 4.712889  |
| H | -1.179405 | 0.427028  | 3.559520  |
| C | -5.040151 | 0.771975  | 3.505999  |
| H | -4.832026 | 1.125121  | 1.393669  |
| C | -4.378146 | 0.499413  | 4.705075  |
| H | -2.463415 | 0.174230  | 5.642169  |
| H | -6.119471 | 0.887748  | 3.491106  |
| H | -4.940656 | 0.395391  | 5.627634  |
| H | -1.332881 | -0.391497 | -0.570658 |
| C | 4.062051  | -5.405526 | 1.990226  |
| H | 3.549454  | -6.324108 | 1.704331  |
| H | 4.962898  | -5.281714 | 1.389626  |
| H | 4.329360  | -5.450846 | 3.042581  |
| H | -2.886738 | 1.267439  | 0.259707  |
| H | -0.950341 | -2.319479 | 0.880761  |
| H | -0.383050 | 1.563387  | 1.784648  |
| H | -1.244250 | -1.398512 | 2.197219  |
| H | 0.758010  | -0.361311 | 0.338778  |
| O | 0.758325  | 0.002455  | 2.344999  |
| H | 1.137548  | -0.675366 | 3.205618  |
| H | 5.138630  | 0.327729  | 0.305856  |

Vibrational frequencies

|           |         |         |
|-----------|---------|---------|
| -770.8959 | 10.4810 | 17.8890 |
| 21.2484   | 26.0357 | 27.7877 |
| 33.7982   | 39.4549 | 39.8351 |
| 43.1022   | 44.3131 | 48.6357 |
| 52.6512   | 54.9788 | 55.5916 |
| 58.9584   | 63.9623 | 66.7605 |
| 69.4355   | 73.3291 | 76.3104 |

|          |          |          |
|----------|----------|----------|
| 86.2899  | 91.0040  | 97.7763  |
| 103.2408 | 110.3926 | 115.6780 |
| 119.3174 | 126.0478 | 127.5363 |
| 135.9989 | 145.5027 | 152.3466 |
| 163.6965 | 164.8026 | 171.4634 |
| 175.7613 | 187.3907 | 190.4987 |
| 199.0913 | 213.9083 | 220.8836 |
| 222.9097 | 224.9311 | 231.8620 |
| 236.3541 | 241.7863 | 245.9921 |
| 246.9459 | 254.1676 | 256.6130 |
| 265.1388 | 279.0569 | 280.7301 |
| 290.7103 | 294.5339 | 303.0911 |
| 309.4374 | 321.8129 | 325.3986 |
| 331.2365 | 332.6538 | 341.6319 |
| 352.1179 | 358.6649 | 359.3505 |
| 363.6661 | 383.5566 | 388.7825 |
| 397.3600 | 400.7309 | 405.4565 |
| 408.7763 | 412.1355 | 414.3507 |
| 419.1299 | 425.1402 | 429.5779 |
| 434.3916 | 440.9193 | 444.1410 |
| 462.2059 | 470.6392 | 475.1900 |
| 483.1897 | 485.3484 | 489.7324 |
| 493.2700 | 504.7527 | 518.8750 |
| 523.6616 | 534.5417 | 537.5253 |
| 549.7964 | 551.5505 | 556.2458 |
| 574.0938 | 577.1823 | 582.1528 |
| 599.2793 | 616.9908 | 628.3091 |
| 629.4975 | 629.6828 | 632.7089 |
| 635.7290 | 652.4290 | 666.0960 |
| 672.9669 | 693.6749 | 696.0069 |
| 704.7608 | 711.0126 | 713.3634 |



|           |           |           |
|-----------|-----------|-----------|
| 714.7710  | 722.1959  | 733.7352  |
| 741.3890  | 742.9490  | 755.7789  |
| 765.8825  | 769.3706  | 773.1300  |
| 774.1056  | 781.1602  | 787.0612  |
| 791.2506  | 797.8464  | 802.4652  |
| 812.1138  | 822.1735  | 827.5536  |
| 839.5797  | 846.7861  | 852.4705  |
| 857.1966  | 868.9571  | 875.4094  |
| 876.2870  | 876.7422  | 889.3841  |
| 893.0932  | 901.9503  | 910.4604  |
| 917.0114  | 926.2003  | 941.1032  |
| 943.5721  | 948.8613  | 950.2873  |
| 955.8870  | 957.6628  | 958.9520  |
| 969.1919  | 973.7203  | 976.3499  |
| 982.6626  | 986.1765  | 988.1187  |
| 998.2955  | 1000.0037 | 1000.1358 |
| 1000.5829 | 1010.4453 | 1012.9230 |
| 1013.7806 | 1016.0883 | 1019.0789 |
| 1020.5557 | 1021.9793 | 1024.0171 |
| 1032.4719 | 1049.3822 | 1051.2668 |
| 1052.6724 | 1055.5210 | 1057.8505 |
| 1059.2757 | 1067.9438 | 1070.2706 |
| 1074.0510 | 1083.6183 | 1085.1783 |
| 1100.3036 | 1103.8698 | 1106.8630 |
| 1109.4048 | 1118.6478 | 1125.4439 |
| 1133.2019 | 1135.7757 | 1136.0107 |
| 1137.4206 | 1148.5297 | 1169.4782 |
| 1176.4655 | 1181.3289 | 1190.7465 |
| 1191.7389 | 1194.2611 | 1194.8521 |
| 1195.7534 | 1199.0969 | 1210.6544 |
| 1211.7931 | 1213.7034 | 1214.5995 |

|           |           |           |
|-----------|-----------|-----------|
| 1221.2411 | 1227.0407 | 1235.7176 |
| 1247.8527 | 1253.3755 | 1254.9194 |
| 1257.7217 | 1267.6763 | 1274.6487 |
| 1277.4291 | 1279.5863 | 1282.9889 |
| 1293.4626 | 1295.7776 | 1323.4753 |
| 1325.9767 | 1330.8100 | 1332.1554 |
| 1335.3549 | 1338.0863 | 1348.8098 |
| 1359.6119 | 1360.6988 | 1362.6754 |
| 1368.5252 | 1369.9900 | 1381.3511 |
| 1390.2088 | 1392.6790 | 1399.8650 |
| 1408.7294 | 1410.9760 | 1416.7451 |
| 1417.8061 | 1418.7805 | 1420.3855 |
| 1421.4808 | 1423.0221 | 1426.3515 |
| 1430.3316 | 1435.0421 | 1442.4648 |
| 1443.4937 | 1447.9895 | 1462.3526 |
| 1470.3944 | 1475.8962 | 1477.3162 |
| 1477.7068 | 1480.2837 | 1481.2094 |
| 1489.3722 | 1491.2647 | 1493.6742 |
| 1494.1185 | 1495.8356 | 1496.2180 |
| 1502.3356 | 1504.0200 | 1505.7484 |
| 1508.6386 | 1510.6929 | 1510.8940 |
| 1511.3474 | 1513.9478 | 1519.9875 |
| 1521.3578 | 1522.7757 | 1524.3893 |
| 1530.8778 | 1531.5609 | 1541.6019 |
| 1553.8205 | 1554.0208 | 1593.0732 |
| 1609.6073 | 1617.6665 | 1625.6995 |
| 1626.8806 | 1633.0221 | 1636.5824 |
| 1643.8162 | 1643.8555 | 1645.3095 |
| 1658.7318 | 1670.8648 | 1671.9097 |
| 1718.2512 | 1790.1862 | 1848.8023 |
| 3028.9732 | 3033.5799 | 3036.9563 |

|           |           |           |
|-----------|-----------|-----------|
| 3044.4656 | 3058.5367 | 3061.9919 |
| 3063.2779 | 3070.4723 | 3085.1742 |
| 3095.3863 | 3098.7857 | 3103.1674 |
| 3106.3031 | 3111.3989 | 3113.1653 |
| 3115.9087 | 3118.3011 | 3118.8609 |
| 3122.9971 | 3126.1673 | 3136.0094 |
| 3137.4725 | 3137.6037 | 3143.3515 |
| 3149.7512 | 3164.2244 | 3170.5500 |
| 3180.0773 | 3182.1785 | 3185.9036 |
| 3188.2669 | 3188.7869 | 3188.8613 |
| 3190.1935 | 3191.1960 | 3192.9721 |
| 3195.9795 | 3199.7412 | 3200.4828 |
| 3203.8832 | 3205.9385 | 3206.3497 |
| 3208.0600 | 3208.9833 | 3210.8795 |
| 3213.0838 | 3216.0590 | 3216.7360 |
| 3216.8155 | 3219.1251 | 3226.6452 |
| 3261.0197 | 3379.2114 | 3397.3904 |
| 3435.8705 | 3471.1778 | 3699.6983 |

### **M9RR**

Zero-point correction= 1.007098

Thermal correction to Energy= 1.066032

Thermal correction to Enthalpy= 1.066976

Thermal correction to Gibbs Free Energy= 0.912310

Sum of electronic and zero-point Energies= -3026.431157

Sum of electronic and thermal Energies= -3026.372223

Sum of electronic and thermal Enthalpies= -3026.371279

Sum of electronic and thermal Free Energies= -3026.525946

### Cartesian coordinates

|   |          |           |          |
|---|----------|-----------|----------|
| C | 3.035404 | -3.447326 | 2.779702 |
| C | 2.154760 | -2.374194 | 2.691199 |

|   |           |           |           |
|---|-----------|-----------|-----------|
| C | 1.634443  | -2.043777 | 1.419609  |
| C | 2.033520  | -2.785861 | 0.304498  |
| C | 2.931571  | -3.855726 | 0.437230  |
| N | 3.396010  | -4.150416 | 1.682315  |
| H | 3.461347  | -3.739368 | 3.728802  |
| C | 1.546345  | -2.373987 | -1.049237 |
| C | 0.361836  | -2.946709 | -1.602869 |
| C | 2.204256  | -1.345523 | -1.704696 |
| C | -0.339316 | -4.016441 | -0.977510 |
| C | -0.141969 | -2.420581 | -2.839705 |
| C | 1.696333  | -0.831244 | -2.922900 |
| C | -1.483836 | -4.533221 | -1.544273 |
| H | 0.044576  | -4.443230 | -0.055311 |
| C | -1.325681 | -2.977786 | -3.392730 |
| C | 0.553041  | -1.357866 | -3.475738 |
| H | 2.215826  | -0.011307 | -3.406621 |
| C | -1.980518 | -4.012175 | -2.762731 |
| H | -2.008734 | -5.346098 | -1.053769 |
| H | -1.704263 | -2.573665 | -4.327184 |
| H | 0.164480  | -0.963491 | -4.410143 |
| H | -2.882088 | -4.430452 | -3.196935 |
| C | 0.714559  | -0.830255 | 1.300934  |
| O | 1.844960  | -1.697575 | 3.795264  |
| C | 3.434401  | -4.639563 | -0.735387 |
| H | 2.860835  | -4.382389 | -1.623390 |
| H | 4.481123  | -4.386762 | -0.931905 |
| H | 3.358015  | -5.717444 | -0.575166 |
| C | 3.458097  | -0.776333 | -1.082575 |
| O | 4.446256  | -1.494147 | -0.880004 |
| N | 3.364711  | 0.527101  | -0.758603 |
| H | 2.465902  | 0.997071  | -0.901506 |

|   |           |           |           |
|---|-----------|-----------|-----------|
| C | 4.417409  | 1.260107  | -0.058511 |
| C | 3.808434  | 1.865817  | 1.219879  |
| H | 4.544779  | 2.521495  | 1.696004  |
| H | 2.939182  | 2.485889  | 0.961904  |
| O | 3.461498  | 0.845952  | 2.145849  |
| H | 2.495206  | 0.701954  | 2.129701  |
| C | 5.145954  | 2.269528  | -1.002038 |
| C | 4.186749  | 3.373841  | -1.481476 |
| H | 3.317127  | 2.947538  | -1.991596 |
| H | 3.823104  | 3.987333  | -0.651566 |
| H | 4.695927  | 4.039288  | -2.186804 |
| C | 5.685192  | 1.502524  | -2.225352 |
| H | 4.872314  | 1.066765  | -2.812963 |
| H | 6.247053  | 2.178826  | -2.878550 |
| H | 6.352325  | 0.690034  | -1.919426 |
| C | 6.340382  | 2.904549  | -0.262486 |
| H | 7.004509  | 2.136130  | 0.149149  |
| H | 6.926806  | 3.516658  | -0.955915 |
| H | 6.024136  | 3.555615  | 0.557384  |
| N | -0.802754 | -1.419568 | 1.249426  |
| C | -1.774287 | -0.654510 | 0.408347  |
| C | -3.015737 | -1.541767 | 0.223286  |
| O | -3.070203 | -2.675879 | 0.660178  |
| O | -3.935907 | -0.888834 | -0.465089 |
| C | -5.260423 | -1.491610 | -0.820354 |
| C | -5.996306 | -1.910945 | 0.451078  |
| H | -5.496296 | -2.743884 | 0.945066  |
| H | -6.065151 | -1.074363 | 1.150314  |
| H | -7.010466 | -2.219280 | 0.181564  |
| C | -5.961489 | -0.329458 | -1.516981 |
| H | -5.381893 | 0.007082  | -2.379616 |

|   |           |           |           |
|---|-----------|-----------|-----------|
| H | -6.949706 | -0.649549 | -1.857036 |
| H | -6.085439 | 0.515210  | -0.833523 |
| C | -5.017916 | -2.656144 | -1.775678 |
| H | -5.979687 | -3.025623 | -2.142477 |
| H | -4.421755 | -2.326410 | -2.630185 |
| H | -4.495366 | -3.472243 | -1.275892 |
| P | -0.371095 | 2.398946  | -0.401358 |
| O | 0.815011  | 1.694859  | -1.029906 |
| C | 0.047072  | 4.081763  | 0.119251  |
| C | 0.982463  | 4.799431  | -0.642817 |
| C | -0.549793 | 4.682762  | 1.237517  |
| C | 1.322159  | 6.102981  | -0.284523 |
| H | 1.446514  | 4.332776  | -1.504292 |
| C | -0.207128 | 5.988941  | 1.590786  |
| H | -1.264641 | 4.121667  | 1.829886  |
| C | 0.727833  | 6.697600  | 0.832525  |
| H | 2.050612  | 6.652238  | -0.872784 |
| H | -0.665915 | 6.450261  | 2.459797  |
| H | 0.994733  | 7.712305  | 1.112005  |
| C | -1.769964 | 2.445026  | -1.556318 |
| C | -1.770266 | 1.524166  | -2.614174 |
| C | -2.864240 | 3.303466  | -1.371685 |
| C | -2.866313 | 1.453608  | -3.474933 |
| H | -0.912413 | 0.874417  | -2.756849 |
| C | -3.955234 | 3.230647  | -2.236983 |
| H | -2.864549 | 4.021362  | -0.556739 |
| C | -3.957545 | 2.304776  | -3.285398 |
| H | -2.866967 | 0.736539  | -4.289981 |
| H | -4.802527 | 3.893905  | -2.094956 |
| H | -4.810536 | 2.249366  | -3.954658 |
| N | -1.017836 | 1.693171  | 0.986558  |

|   |           |           |           |
|---|-----------|-----------|-----------|
| C | -2.140305 | 0.757681  | 0.964566  |
| C | -2.854305 | 0.686547  | 2.307085  |
| C | -2.169247 | 0.480497  | 3.514396  |
| C | -4.249568 | 0.816889  | 2.334237  |
| C | -2.873365 | 0.383872  | 4.716891  |
| H | -1.085985 | 0.411249  | 3.522315  |
| C | -4.951536 | 0.721931  | 3.536200  |
| H | -4.785692 | 0.999685  | 1.408496  |
| C | -4.264559 | 0.498630  | 4.731388  |
| H | -2.330032 | 0.223055  | 5.643013  |
| H | -6.032036 | 0.828157  | 3.537945  |
| H | -4.808719 | 0.423498  | 5.667768  |
| H | -1.307462 | -0.530944 | -0.573260 |
| C | 4.353507  | -5.266921 | 1.864135  |
| H | 3.867178  | -6.207268 | 1.603794  |
| H | 5.222104  | -5.107239 | 1.226110  |
| H | 4.666806  | -5.293984 | 2.904425  |
| H | -2.859894 | 1.130990  | 0.237257  |
| H | -0.822743 | -2.392729 | 0.921253  |
| H | -0.291131 | 1.424931  | 1.661843  |
| H | -1.134012 | -1.449406 | 2.219993  |
| H | 0.802572  | -0.375083 | 0.308056  |
| O | 0.819651  | 0.033514  | 2.314247  |
| H | 1.357225  | -0.867989 | 3.448940  |
| H | 5.149935  | 0.511639  | 0.258306  |

Vibrational frequencies

|         |         |         |
|---------|---------|---------|
| 9.8725  | 18.0697 | 25.7159 |
| 28.1595 | 30.3412 | 34.2252 |
| 38.0188 | 39.3669 | 42.6273 |
| 44.5597 | 49.1766 | 53.8950 |

|          |          |          |
|----------|----------|----------|
| 55.1975  | 58.1989  | 63.5313  |
| 68.6326  | 69.4153  | 74.7843  |
| 76.6797  | 78.5948  | 87.7870  |
| 92.4540  | 98.6613  | 104.6879 |
| 113.9985 | 118.2099 | 120.9655 |
| 129.1269 | 138.7091 | 143.1556 |
| 148.7065 | 155.0082 | 167.9563 |
| 170.3039 | 173.5373 | 178.7014 |
| 188.0954 | 190.2051 | 200.8995 |
| 214.2674 | 218.2914 | 219.4611 |
| 226.3827 | 231.9355 | 240.7889 |
| 243.3552 | 247.3079 | 248.9870 |
| 255.8372 | 259.7005 | 263.6270 |
| 277.3090 | 281.0003 | 289.2549 |
| 290.6716 | 294.4661 | 306.9987 |
| 308.8821 | 322.1017 | 327.9430 |
| 331.5566 | 344.1981 | 354.2192 |
| 356.4711 | 360.2838 | 364.9231 |
| 381.6173 | 386.5112 | 392.2187 |
| 398.7750 | 401.1199 | 406.3641 |
| 408.5458 | 412.9653 | 413.8540 |
| 418.0995 | 426.2654 | 431.7291 |
| 434.2062 | 441.5722 | 446.8914 |
| 459.1234 | 471.1881 | 475.3196 |
| 480.7751 | 482.9484 | 488.9525 |
| 494.2806 | 515.4209 | 523.4780 |
| 530.8948 | 534.0891 | 550.1153 |
| 552.4876 | 556.3457 | 570.1097 |
| 576.2129 | 577.2487 | 590.9997 |
| 602.6450 | 621.8482 | 629.1488 |
| 629.3781 | 633.2027 | 637.1434 |



|           |           |           |
|-----------|-----------|-----------|
| 643.3407  | 651.1800  | 668.5033  |
| 683.0104  | 695.4981  | 702.7394  |
| 712.1573  | 713.1744  | 716.1465  |
| 728.8809  | 739.9443  | 745.8805  |
| 748.2490  | 754.1581  | 766.0915  |
| 767.6397  | 771.2219  | 776.8327  |
| 778.2781  | 782.2945  | 788.2212  |
| 795.5557  | 801.3365  | 814.1390  |
| 826.7755  | 835.4012  | 840.1393  |
| 843.7955  | 852.0534  | 861.5237  |
| 872.9995  | 875.9726  | 877.2663  |
| 879.7278  | 886.9115  | 893.8223  |
| 899.6967  | 911.4458  | 927.0247  |
| 934.6973  | 940.1441  | 942.9852  |
| 948.4436  | 950.1061  | 956.0812  |
| 958.4478  | 960.9936  | 970.3545  |
| 974.2758  | 975.9502  | 976.8152  |
| 987.7239  | 987.8683  | 995.4904  |
| 998.1478  | 999.2820  | 999.7159  |
| 1006.0628 | 1012.2767 | 1012.9897 |
| 1013.7655 | 1016.0857 | 1019.0901 |
| 1021.8678 | 1023.3443 | 1025.9007 |
| 1033.4756 | 1049.2876 | 1050.5823 |
| 1051.3820 | 1054.4289 | 1058.6719 |
| 1059.9114 | 1067.1453 | 1070.7492 |
| 1081.7955 | 1084.7758 | 1091.7432 |
| 1101.8386 | 1104.9657 | 1107.4242 |
| 1109.1630 | 1120.2848 | 1125.4137 |
| 1129.8280 | 1135.6849 | 1136.9406 |
| 1138.0543 | 1148.2176 | 1171.3599 |
| 1181.7090 | 1184.0890 | 1193.4354 |

|           |           |           |
|-----------|-----------|-----------|
| 1193.7503 | 1194.0880 | 1194.7110 |
| 1198.0014 | 1200.2945 | 1211.0980 |
| 1214.3182 | 1215.0276 | 1219.2588 |
| 1222.7709 | 1230.4759 | 1248.8463 |
| 1251.5758 | 1253.0930 | 1262.6223 |
| 1268.7200 | 1272.8695 | 1276.2992 |
| 1282.6374 | 1283.0120 | 1293.6556 |
| 1296.9806 | 1320.1723 | 1325.7215 |
| 1330.5056 | 1330.7665 | 1331.4047 |
| 1340.7549 | 1347.7204 | 1357.2666 |
| 1358.2654 | 1361.5942 | 1363.2230 |
| 1371.2834 | 1380.9286 | 1383.3012 |
| 1388.5181 | 1393.4133 | 1396.1855 |
| 1405.7989 | 1409.1684 | 1410.1077 |
| 1417.5598 | 1418.4407 | 1419.7701 |
| 1420.7092 | 1420.9508 | 1422.5543 |
| 1425.3656 | 1437.9666 | 1442.1930 |
| 1447.4271 | 1451.6267 | 1469.7986 |
| 1471.5583 | 1475.1160 | 1475.6171 |
| 1477.1157 | 1479.2196 | 1479.2867 |
| 1489.0942 | 1493.8967 | 1494.0227 |
| 1495.3094 | 1496.2036 | 1498.7066 |
| 1503.5597 | 1503.6790 | 1507.7668 |
| 1510.2963 | 1511.6583 | 1513.0263 |
| 1518.2976 | 1519.1388 | 1521.6955 |
| 1523.4213 | 1525.5256 | 1528.4064 |
| 1531.8641 | 1535.3258 | 1541.7882 |
| 1554.4563 | 1563.2071 | 1610.8973 |
| 1618.7984 | 1625.4055 | 1626.2357 |
| 1628.9057 | 1632.3465 | 1636.3481 |
| 1643.8296 | 1644.1545 | 1645.8935 |

|           |           |           |
|-----------|-----------|-----------|
| 1659.1224 | 1672.2257 | 1676.9118 |
| 1716.6425 | 1788.1502 | 2762.3607 |
| 3025.4126 | 3035.0693 | 3038.1815 |
| 3044.9044 | 3058.1662 | 3063.1009 |
| 3066.1279 | 3070.0594 | 3075.0461 |
| 3080.2965 | 3092.8755 | 3096.0977 |
| 3103.6938 | 3105.4921 | 3108.9514 |
| 3112.0668 | 3116.3541 | 3119.2729 |
| 3124.4019 | 3133.4524 | 3135.1514 |
| 3137.2461 | 3140.2894 | 3142.8510 |
| 3150.6232 | 3163.5441 | 3170.9741 |
| 3184.5304 | 3184.8625 | 3185.2164 |
| 3186.6189 | 3188.1797 | 3188.5939 |
| 3188.7188 | 3191.1140 | 3192.9952 |
| 3193.2600 | 3198.4023 | 3200.5741 |
| 3200.6471 | 3206.3091 | 3206.6095 |
| 3207.4726 | 3207.5196 | 3208.0914 |
| 3213.9711 | 3214.6236 | 3215.1789 |
| 3215.8593 | 3219.9982 | 3222.7396 |
| 3266.1002 | 3339.8641 | 3373.0260 |
| 3392.7980 | 3453.8105 | 3571.7117 |

### **TS10RR**

Zero-point correction= 1.005755

Thermal correction to Energy= 1.064368

Thermal correction to Enthalpy= 1.065312

Thermal correction to Gibbs Free Energy= 0.911775

Sum of electronic and zero-point Energies= -3026.427941

Sum of electronic and thermal Energies= -3026.369328

Sum of electronic and thermal Enthalpies= -3026.368384

Sum of electronic and thermal Free Energies= -3026.521922

Cartesian coordinates

|   |           |           |           |
|---|-----------|-----------|-----------|
| C | 2.551526  | -3.692922 | 3.059462  |
| C | 1.756944  | -2.557588 | 2.938819  |
| C | 1.393222  | -2.129769 | 1.640644  |
| C | 1.863769  | -2.839294 | 0.531391  |
| C | 2.676996  | -3.971469 | 0.698398  |
| N | 2.981408  | -4.362717 | 1.966182  |
| H | 2.852874  | -4.061684 | 4.029449  |
| C | 1.486968  | -2.392416 | -0.847722 |
| C | 0.333412  | -2.961146 | -1.472479 |
| C | 2.207922  | -1.393411 | -1.485774 |
| C | -0.417284 | -4.016471 | -0.879731 |
| C | -0.083406 | -2.457472 | -2.749700 |
| C | 1.786957  | -0.908579 | -2.751512 |
| C | -1.525524 | -4.535248 | -1.512458 |
| H | -0.100428 | -4.431195 | 0.072144  |
| C | -1.232072 | -3.015110 | -3.371699 |
| C | 0.670055  | -1.423470 | -3.363993 |
| H | 2.366620  | -0.130144 | -3.235634 |
| C | -1.937286 | -4.032265 | -2.769256 |
| H | -2.086405 | -5.337448 | -1.044690 |
| H | -1.541724 | -2.625317 | -4.337057 |
| H | 0.355421  | -1.049387 | -4.333846 |
| H | -2.812489 | -4.450250 | -3.254767 |
| C | 0.587158  | -0.851300 | 1.512486  |
| O | 1.374349  | -1.912750 | 4.038172  |
| C | 3.243285  | -4.742531 | -0.453732 |
| H | 2.937031  | -4.283674 | -1.390758 |
| H | 4.336357  | -4.740771 | -0.421833 |
| H | 2.901974  | -5.782273 | -0.450173 |

|   |           |           |           |
|---|-----------|-----------|-----------|
| C | 3.458743  | -0.845861 | -0.843591 |
| O | 4.305825  | -1.602136 | -0.353532 |
| N | 3.559332  | 0.502272  | -0.875401 |
| H | 2.710956  | 1.017689  | -1.097522 |
| C | 4.621810  | 1.235896  | -0.187424 |
| C | 3.970957  | 2.228672  | 0.799083  |
| H | 4.745763  | 2.647167  | 1.446300  |
| H | 3.511689  | 3.062726  | 0.253333  |
| O | 3.021242  | 1.597167  | 1.644777  |
| H | 2.225404  | 1.456544  | 1.104074  |
| C | 5.620299  | 1.875874  | -1.200611 |
| C | 4.899989  | 2.834880  | -2.168868 |
| H | 4.115652  | 2.317277  | -2.730827 |
| H | 4.443026  | 3.681445  | -1.646305 |
| H | 5.612757  | 3.242974  | -2.893296 |
| C | 6.281506  | 0.746188  | -2.013772 |
| H | 5.537522  | 0.173679  | -2.575251 |
| H | 6.998912  | 1.161753  | -2.729489 |
| H | 6.817225  | 0.051150  | -1.358590 |
| C | 6.716682  | 2.641517  | -0.434888 |
| H | 7.190962  | 2.003665  | 0.319670  |
| H | 7.495550  | 2.975891  | -1.128252 |
| H | 6.324650  | 3.530634  | 0.068238  |
| N | -1.091559 | -1.443405 | 1.198411  |
| C | -1.913670 | -0.576410 | 0.322141  |
| C | -3.182778 | -1.346163 | -0.082913 |
| O | -3.404525 | -2.482485 | 0.288447  |
| O | -3.932713 | -0.593870 | -0.877208 |
| C | -5.217495 | -1.080915 | -1.466247 |
| C | -6.191799 | -1.460745 | -0.351657 |
| H | -5.834859 | -2.322471 | 0.211882  |

|   |           |           |           |
|---|-----------|-----------|-----------|
| H | -6.340212 | -0.624214 | 0.335150  |
| H | -7.157517 | -1.709562 | -0.800969 |
| C | -5.702393 | 0.143373  | -2.237000 |
| H | -4.973858 | 0.431775  | -2.997962 |
| H | -6.653385 | -0.084098 | -2.725774 |
| H | -5.850706 | 0.991760  | -1.562942 |
| C | -4.911459 | -2.247115 | -2.402106 |
| H | -5.824705 | -2.531662 | -2.932403 |
| H | -4.157485 | -1.955222 | -3.137624 |
| H | -4.543143 | -3.109535 | -1.846360 |
| P | -0.242676 | 2.417389  | -0.074980 |
| O | 1.025690  | 1.679976  | -0.477640 |
| C | 0.148358  | 4.075659  | 0.528346  |
| C | 1.214853  | 4.762314  | -0.074887 |
| C | -0.589886 | 4.688569  | 1.550445  |
| C | 1.540418  | 6.050394  | 0.345502  |
| H | 1.787044  | 4.284245  | -0.863799 |
| C | -0.258931 | 5.979124  | 1.967330  |
| H | -1.404616 | 4.148326  | 2.020920  |
| C | 0.803419  | 6.658480  | 1.366507  |
| H | 2.367814  | 6.577707  | -0.118821 |
| H | -0.826780 | 6.450900  | 2.763160  |
| H | 1.059550  | 7.661201  | 1.694885  |
| C | -1.400388 | 2.534571  | -1.463380 |
| C | -1.216339 | 1.657057  | -2.541148 |
| C | -2.487275 | 3.422244  | -1.455966 |
| C | -2.122199 | 1.659089  | -3.602270 |
| H | -0.366677 | 0.982482  | -2.543846 |
| C | -3.388414 | 3.420135  | -2.519827 |
| H | -2.627773 | 4.108584  | -0.626109 |
| C | -3.205792 | 2.540129  | -3.591585 |

|   |           |           |           |
|---|-----------|-----------|-----------|
| H | -1.980312 | 0.975697  | -4.433643 |
| H | -4.230363 | 4.104924  | -2.515653 |
| H | -3.910108 | 2.542860  | -4.417691 |
| N | -1.121204 | 1.693267  | 1.163895  |
| C | -2.272472 | 0.816397  | 0.938978  |
| C | -3.127407 | 0.681627  | 2.190944  |
| C | -2.580898 | 0.364661  | 3.444163  |
| C | -4.513853 | 0.852509  | 2.081608  |
| C | -3.411534 | 0.203168  | 4.555328  |
| H | -1.507126 | 0.253766  | 3.561464  |
| C | -5.343044 | 0.690612  | 3.192005  |
| H | -4.942474 | 1.119020  | 1.120870  |
| C | -4.793484 | 0.360045  | 4.432374  |
| H | -2.974562 | -0.042995 | 5.518279  |
| H | -6.414951 | 0.828468  | 3.087883  |
| H | -5.436282 | 0.233212  | 5.298010  |
| H | -1.339155 | -0.405362 | -0.593317 |
| C | 3.840301  | -5.550772 | 2.180307  |
| H | 3.388661  | -6.417954 | 1.699711  |
| H | 4.827922  | -5.364694 | 1.757629  |
| H | 3.928059  | -5.732054 | 3.248128  |
| H | -2.889295 | 1.284222  | 0.172631  |
| H | -1.100399 | -2.388709 | 0.804933  |
| H | -0.498291 | 1.351802  | 1.906934  |
| H | -1.519293 | -1.518770 | 2.124591  |
| H | 0.723029  | -0.363909 | 0.541340  |
| O | 0.560265  | -0.085475 | 2.558323  |
| H | 0.967349  | -1.041763 | 3.683586  |
| H | 5.168037  | 0.492934  | 0.402003  |

Vibrational frequencies

|           |          |          |
|-----------|----------|----------|
| -100.1745 | 17.3699  | 20.9321  |
| 25.0085   | 26.3679  | 31.8310  |
| 34.3027   | 38.7049  | 40.8034  |
| 42.9632   | 44.4746  | 48.6075  |
| 49.9119   | 56.6710  | 57.4545  |
| 62.5170   | 63.9964  | 71.5769  |
| 73.1262   | 77.0178  | 83.5759  |
| 91.1079   | 93.5188  | 100.0959 |
| 101.9966  | 108.2246 | 115.2282 |
| 120.8895  | 123.9688 | 127.8072 |
| 136.7151  | 148.2987 | 156.2352 |
| 160.3584  | 170.5248 | 173.9580 |
| 185.5299  | 187.7663 | 195.5309 |
| 200.5634  | 211.8287 | 228.0980 |
| 230.6391  | 232.7370 | 241.2621 |
| 248.3996  | 248.7257 | 252.5180 |
| 259.4670  | 263.8034 | 266.7938 |
| 279.5189  | 289.2626 | 294.9608 |
| 298.1907  | 310.1139 | 311.5835 |
| 317.5075  | 318.8934 | 320.2998 |
| 331.3981  | 337.2885 | 351.5965 |
| 355.9871  | 361.6232 | 367.2064 |
| 379.0373  | 382.4693 | 389.0200 |
| 393.7136  | 395.7009 | 400.8295 |
| 403.3188  | 407.5719 | 409.8338 |
| 413.2935  | 416.7745 | 424.0843 |
| 430.2418  | 438.7453 | 442.5034 |
| 447.2354  | 457.7624 | 469.7580 |
| 478.4527  | 486.8323 | 488.3707 |
| 490.8835  | 492.3257 | 517.0317 |
| 521.5668  | 523.9581 | 534.4083 |



|           |           |           |
|-----------|-----------|-----------|
| 551.9244  | 552.7266  | 555.8085  |
| 567.6866  | 573.0969  | 578.7824  |
| 597.3374  | 620.5937  | 625.2659  |
| 628.9851  | 629.6210  | 632.7162  |
| 637.1358  | 640.8531  | 660.6274  |
| 670.4705  | 689.7080  | 698.8708  |
| 705.6898  | 711.9369  | 712.5524  |
| 720.3835  | 725.2275  | 741.2893  |
| 742.2688  | 749.3584  | 755.7645  |
| 757.5781  | 764.8188  | 767.7338  |
| 770.8060  | 776.7842  | 782.3394  |
| 787.3424  | 798.4337  | 801.5142  |
| 807.4496  | 816.8333  | 833.2337  |
| 837.3181  | 844.5331  | 859.2791  |
| 869.0494  | 876.0023  | 876.4030  |
| 877.7773  | 883.9628  | 894.8228  |
| 900.5894  | 903.1945  | 931.1596  |
| 933.8501  | 939.1056  | 941.2917  |
| 948.3278  | 951.2485  | 952.6642  |
| 956.1600  | 957.9170  | 960.3160  |
| 968.9119  | 972.6726  | 974.1370  |
| 978.6564  | 982.0440  | 985.9881  |
| 996.6558  | 998.6150  | 999.3338  |
| 1000.3975 | 1012.3138 | 1012.4933 |
| 1013.6359 | 1015.4012 | 1018.7549 |
| 1020.0925 | 1021.4885 | 1021.9411 |
| 1030.2707 | 1049.4155 | 1050.4511 |
| 1051.4994 | 1054.0616 | 1058.8278 |
| 1059.2578 | 1065.6246 | 1070.2199 |
| 1082.0497 | 1083.0923 | 1100.9844 |
| 1101.6715 | 1104.9568 | 1106.6119 |

|           |           |           |
|-----------|-----------|-----------|
| 1108.8291 | 1116.4820 | 1126.3509 |
| 1129.9629 | 1134.7357 | 1135.7620 |
| 1138.4527 | 1146.9607 | 1159.3455 |
| 1179.4840 | 1181.6349 | 1190.3993 |
| 1194.1991 | 1194.2136 | 1195.4956 |
| 1197.0564 | 1203.0148 | 1210.3019 |
| 1212.3616 | 1216.0743 | 1220.4878 |
| 1221.5219 | 1225.2006 | 1235.8341 |
| 1248.3963 | 1253.8524 | 1255.3866 |
| 1265.9549 | 1276.5489 | 1277.9301 |
| 1281.0354 | 1281.5954 | 1285.0319 |
| 1292.1373 | 1296.8042 | 1322.9856 |
| 1324.8620 | 1326.8142 | 1330.0821 |
| 1333.5242 | 1338.6775 | 1347.2584 |
| 1352.8627 | 1358.5774 | 1359.6382 |
| 1363.7015 | 1370.6370 | 1379.6134 |
| 1382.2309 | 1393.7883 | 1394.6677 |
| 1406.6906 | 1409.4050 | 1409.6965 |
| 1411.4038 | 1413.6314 | 1416.3699 |
| 1417.8628 | 1418.4878 | 1422.9181 |
| 1423.3919 | 1439.4969 | 1439.7621 |
| 1445.8571 | 1447.5315 | 1468.4815 |
| 1471.0110 | 1476.1340 | 1477.6698 |
| 1478.3745 | 1478.4556 | 1480.3389 |
| 1492.7763 | 1494.1698 | 1495.0692 |
| 1496.0131 | 1496.0191 | 1500.9799 |
| 1502.2961 | 1504.0018 | 1506.6415 |
| 1508.4813 | 1510.9888 | 1512.3222 |
| 1520.7045 | 1522.0077 | 1522.8140 |
| 1523.4707 | 1525.7538 | 1528.7531 |
| 1531.6703 | 1537.8715 | 1542.9482 |

|           |           |           |
|-----------|-----------|-----------|
| 1553.0590 | 1569.3955 | 1594.9033 |
| 1614.7055 | 1625.8021 | 1626.7184 |
| 1628.4716 | 1636.8595 | 1642.0896 |
| 1644.0507 | 1644.5324 | 1645.4767 |
| 1659.2910 | 1671.0661 | 1677.9089 |
| 1720.0019 | 1788.6908 | 2730.5722 |
| 3033.6917 | 3035.7172 | 3039.2690 |
| 3045.7571 | 3057.6834 | 3063.0553 |
| 3063.6771 | 3069.6787 | 3076.6225 |
| 3083.8803 | 3096.1692 | 3096.8188 |
| 3103.5362 | 3106.1256 | 3109.1012 |
| 3111.5348 | 3115.2116 | 3118.3154 |
| 3121.0242 | 3125.3735 | 3134.4616 |
| 3136.6381 | 3139.6455 | 3141.7097 |
| 3149.0579 | 3167.4898 | 3170.6423 |
| 3183.0026 | 3185.5467 | 3188.1036 |
| 3188.8334 | 3189.4783 | 3190.4732 |
| 3190.8083 | 3191.5091 | 3192.9566 |
| 3195.1725 | 3196.1482 | 3198.8278 |
| 3203.4066 | 3204.1264 | 3205.3796 |
| 3207.3829 | 3209.6644 | 3210.5806 |
| 3212.4687 | 3213.3454 | 3213.9063 |
| 3216.3749 | 3217.6466 | 3220.3685 |
| 3265.4146 | 3337.0741 | 3428.9209 |
| 3501.1300 | 3503.7579 | 3700.6415 |

### **M10RR**

Zero-point correction= 1.005452

Thermal correction to Energy= 1.065357

Thermal correction to Enthalpy= 1.066301

Thermal correction to Gibbs Free Energy= 0.909786

Sum of electronic and zero-point Energies= -3026.432498

Sum of electronic and thermal Energies= -3026.372593

Sum of electronic and thermal Enthalpies= -3026.371649

Sum of electronic and thermal Free Energies= -3026.528164

Cartesian coordinates

|   |           |           |           |
|---|-----------|-----------|-----------|
| C | 2.889598  | -3.678047 | 3.011411  |
| C | 2.163388  | -2.492841 | 2.954483  |
| C | 1.757162  | -2.010506 | 1.688626  |
| C | 2.105111  | -2.735024 | 0.536876  |
| C | 2.864447  | -3.910514 | 0.641486  |
| N | 3.221616  | -4.341697 | 1.884755  |
| H | 3.213172  | -4.086758 | 3.957826  |
| C | 1.639492  | -2.279990 | -0.812266 |
| C | 0.487891  | -2.899297 | -1.393848 |
| C | 2.286319  | -1.245857 | -1.473901 |
| C | -0.194273 | -3.989501 | -0.781504 |
| C | -0.004172 | -2.405878 | -2.647356 |
| C | 1.802682  | -0.786653 | -2.726317 |
| C | -1.316258 | -4.537474 | -1.362779 |
| H | 0.172740  | -4.395747 | 0.155225  |
| C | -1.166226 | -2.992484 | -3.216883 |
| C | 0.686346  | -1.348933 | -3.294747 |
| H | 2.334172  | 0.008011  | -3.238243 |
| C | -1.811794 | -4.032462 | -2.588662 |
| H | -1.826659 | -5.361743 | -0.875920 |
| H | -1.535399 | -2.602976 | -4.161164 |
| H | 0.322890  | -0.994848 | -4.254886 |
| H | -2.700746 | -4.469518 | -3.030014 |
| C | 1.051738  | -0.705345 | 1.618166  |
| O | 1.888585  | -1.874119 | 4.102813  |

|   |           |           |           |
|---|-----------|-----------|-----------|
| C | 3.323875  | -4.690310 | -0.552101 |
| H | 3.030069  | -4.176674 | -1.464257 |
| H | 4.412860  | -4.789363 | -0.558221 |
| H | 2.891263  | -5.695586 | -0.567651 |
| C | 3.526186  | -0.638867 | -0.869830 |
| O | 4.388963  | -1.349817 | -0.340801 |
| N | 3.600088  | 0.709043  | -0.968258 |
| H | 2.740758  | 1.193199  | -1.212263 |
| C | 4.645537  | 1.489527  | -0.304918 |
| C | 3.971415  | 2.518334  | 0.628345  |
| H | 4.730494  | 2.955718  | 1.281849  |
| H | 3.535294  | 3.337800  | 0.041346  |
| O | 2.992517  | 1.919246  | 1.462910  |
| H | 2.208738  | 1.777627  | 0.898819  |
| C | 5.650618  | 2.092375  | -1.333206 |
| C | 4.932692  | 2.986336  | -2.363049 |
| H | 4.170003  | 2.424732  | -2.912311 |
| H | 4.447979  | 3.849204  | -1.895094 |
| H | 5.652611  | 3.370529  | -3.093325 |
| C | 6.345039  | 0.933457  | -2.074591 |
| H | 5.621040  | 0.318523  | -2.617094 |
| H | 7.067181  | 1.323640  | -2.799831 |
| H | 6.881915  | 0.283884  | -1.375378 |
| C | 6.720198  | 2.915430  | -0.589479 |
| H | 7.192593  | 2.324877  | 0.203804  |
| H | 7.504822  | 3.228230  | -1.286328 |
| H | 6.304566  | 3.821511  | -0.138168 |
| N | -1.213273 | -1.589229 | 1.187282  |
| C | -2.036337 | -0.767553 | 0.309391  |
| C | -3.327083 | -1.497300 | -0.108445 |
| O | -3.611374 | -2.615168 | 0.276428  |

|   |           |           |           |
|---|-----------|-----------|-----------|
| O | -4.039364 | -0.741223 | -0.947814 |
| C | -5.307324 | -1.215461 | -1.564315 |
| C | -6.336536 | -1.526428 | -0.476855 |
| H | -6.021446 | -2.369009 | 0.138069  |
| H | -6.491472 | -0.656604 | 0.166588  |
| H | -7.290512 | -1.773137 | -0.952114 |
| C | -5.735261 | -0.012073 | -2.400457 |
| H | -4.976129 | 0.223987  | -3.149546 |
| H | -6.677881 | -0.231420 | -2.909205 |
| H | -5.875972 | 0.867632  | -1.766153 |
| C | -5.005973 | -2.424688 | -2.448890 |
| H | -5.906570 | -2.698698 | -3.006020 |
| H | -4.215467 | -2.180251 | -3.163586 |
| H | -4.686744 | -3.278504 | -1.851044 |
| P | -0.378370 | 2.340268  | -0.066774 |
| O | 0.954513  | 1.740660  | -0.495996 |
| C | -0.121979 | 3.991646  | 0.626931  |
| C | 0.919901  | 4.777766  | 0.109456  |
| C | -0.945912 | 4.501792  | 1.640179  |
| C | 1.135323  | 6.062660  | 0.604369  |
| H | 1.558125  | 4.377469  | -0.671611 |
| C | -0.727546 | 5.790356  | 2.130479  |
| H | -1.739188 | 3.883950  | 2.048316  |
| C | 0.310898  | 6.568957  | 1.614040  |
| H | 1.944714  | 6.666864  | 0.206693  |
| H | -1.362919 | 6.182745  | 2.918310  |
| H | 0.480627  | 7.569534  | 1.999964  |
| C | -1.537399 | 2.444562  | -1.453822 |
| C | -1.318058 | 1.601943  | -2.552201 |
| C | -2.648750 | 3.301233  | -1.435169 |
| C | -2.210380 | 1.609973  | -3.624493 |

|   |           |           |           |
|---|-----------|-----------|-----------|
| H | -0.450526 | 0.951613  | -2.562282 |
| C | -3.537366 | 3.304153  | -2.509562 |
| H | -2.817149 | 3.962265  | -0.590267 |
| C | -3.317520 | 2.460987  | -3.603390 |
| H | -2.039950 | 0.955193  | -4.473334 |
| H | -4.397573 | 3.965784  | -2.496842 |
| H | -4.011326 | 2.468420  | -4.438293 |
| N | -1.197610 | 1.486176  | 1.117033  |
| C | -2.372117 | 0.632628  | 0.918163  |
| C | -3.178830 | 0.515894  | 2.202580  |
| C | -2.578220 | 0.243027  | 3.441310  |
| C | -4.571549 | 0.654363  | 2.144701  |
| C | -3.358851 | 0.100981  | 4.590202  |
| H | -1.499114 | 0.145973  | 3.522293  |
| C | -5.352752 | 0.509980  | 3.292078  |
| H | -5.042391 | 0.881996  | 1.193646  |
| C | -4.747697 | 0.229999  | 4.518873  |
| H | -2.879262 | -0.109249 | 5.541369  |
| H | -6.430717 | 0.623098  | 3.227127  |
| H | -5.352383 | 0.119261  | 5.413746  |
| H | -1.478896 | -0.585252 | -0.617485 |
| C | 4.020753  | -5.581961 | 2.028562  |
| H | 3.494239  | -6.408487 | 1.552886  |
| H | 4.994367  | -5.440638 | 1.559012  |
| H | 4.153063  | -5.793724 | 3.086044  |
| H | -3.002743 | 1.121704  | 0.176789  |
| H | -1.159189 | -2.527076 | 0.797308  |
| H | -0.600344 | 1.230848  | 1.901965  |
| H | -1.666970 | -1.692858 | 2.093186  |
| H | 0.869304  | -0.289015 | 0.626944  |
| O | 0.871552  | -0.018952 | 2.637650  |

|   |          |           |          |
|---|----------|-----------|----------|
| H | 1.428239 | -1.025670 | 3.862652 |
| H | 5.191789 | 0.780427  | 0.324529 |

Vibrational frequencies

|          |          |          |
|----------|----------|----------|
| 16.2790  | 20.7031  | 23.5258  |
| 26.7407  | 32.7459  | 37.1852  |
| 39.4536  | 41.3012  | 44.1580  |
| 45.4084  | 48.4997  | 49.5306  |
| 52.9494  | 54.3340  | 57.9573  |
| 59.5148  | 65.2534  | 66.5263  |
| 72.7257  | 76.1929  | 78.8646  |
| 88.7537  | 90.1556  | 96.8187  |
| 103.1565 | 113.6693 | 121.9223 |
| 124.5051 | 127.2651 | 144.0411 |
| 144.4183 | 147.3250 | 156.8962 |
| 160.0704 | 166.9200 | 173.1202 |
| 185.9794 | 193.7379 | 199.0092 |
| 203.7224 | 206.6642 | 224.9360 |
| 227.3784 | 231.6834 | 243.0383 |
| 247.3409 | 249.3013 | 258.4625 |
| 261.1495 | 265.6618 | 274.3135 |
| 279.7395 | 286.4709 | 291.6710 |
| 292.5875 | 304.6709 | 308.6773 |
| 310.9433 | 319.5434 | 323.2087 |
| 325.6074 | 326.5418 | 345.0603 |
| 348.5407 | 355.6181 | 362.5597 |
| 363.5842 | 370.8898 | 373.7797 |
| 389.1196 | 393.3846 | 394.6823 |
| 400.1504 | 403.6190 | 405.9219 |
| 409.0686 | 412.5017 | 417.6189 |
| 422.2424 | 424.1729 | 439.0101 |



|           |           |           |
|-----------|-----------|-----------|
| 440.0831  | 443.4382  | 454.7566  |
| 464.8037  | 473.6676  | 480.6441  |
| 489.5855  | 489.7084  | 495.1192  |
| 510.9525  | 520.7297  | 523.8338  |
| 532.7390  | 545.0946  | 548.6611  |
| 552.6925  | 564.8296  | 570.5788  |
| 578.3528  | 593.4914  | 612.5953  |
| 618.5805  | 629.4655  | 630.2010  |
| 634.5182  | 638.7555  | 639.0690  |
| 647.7795  | 656.5691  | 671.7942  |
| 686.8399  | 701.1900  | 710.6176  |
| 712.7462  | 714.7261  | 728.7261  |
| 732.7502  | 740.7669  | 746.9404  |
| 755.4201  | 755.9864  | 766.6066  |
| 769.6449  | 777.2953  | 781.0179  |
| 781.6038  | 789.9244  | 796.2214  |
| 800.8628  | 805.1874  | 813.0731  |
| 820.0430  | 838.1760  | 855.1941  |
| 857.4062  | 872.3358  | 873.2927  |
| 875.0239  | 877.4957  | 880.6161  |
| 893.5191  | 901.4015  | 905.1778  |
| 913.2998  | 927.3614  | 936.8081  |
| 939.1943  | 941.6801  | 945.3013  |
| 951.2925  | 953.3181  | 956.7267  |
| 959.5728  | 965.4985  | 971.7151  |
| 977.7694  | 980.2810  | 985.7927  |
| 991.6335  | 995.8943  | 996.6929  |
| 1000.7835 | 1011.3598 | 1012.6090 |
| 1012.9507 | 1014.3378 | 1015.5017 |
| 1019.2261 | 1019.9993 | 1020.7943 |
| 1024.3973 | 1031.8308 | 1033.6963 |

|           |           |           |
|-----------|-----------|-----------|
| 1049.8259 | 1051.4276 | 1054.0610 |
| 1056.9238 | 1058.7750 | 1061.9115 |
| 1066.6630 | 1070.8378 | 1080.8853 |
| 1087.4697 | 1101.3048 | 1103.2463 |
| 1107.7828 | 1109.0298 | 1117.4161 |
| 1129.5030 | 1133.2592 | 1134.7241 |
| 1138.0974 | 1138.7434 | 1149.1461 |
| 1156.1654 | 1160.5534 | 1181.0432 |
| 1183.9897 | 1193.0713 | 1194.1280 |
| 1194.8626 | 1195.4635 | 1196.7626 |
| 1205.9099 | 1210.5694 | 1213.7943 |
| 1216.3454 | 1222.5192 | 1225.9478 |
| 1230.8409 | 1248.0422 | 1252.8804 |
| 1256.1186 | 1267.8286 | 1278.4871 |
| 1278.6491 | 1279.5966 | 1279.9311 |
| 1292.6362 | 1293.2488 | 1317.7032 |
| 1320.1370 | 1325.1670 | 1329.6839 |
| 1333.7115 | 1337.5991 | 1355.8573 |
| 1356.6267 | 1359.1920 | 1363.4959 |
| 1369.0272 | 1371.7620 | 1379.2183 |
| 1384.1497 | 1389.0227 | 1396.5051 |
| 1409.0521 | 1409.7719 | 1413.3252 |
| 1413.4776 | 1416.4664 | 1418.3640 |
| 1426.6339 | 1427.2427 | 1429.3328 |
| 1440.1204 | 1441.7783 | 1445.3325 |
| 1461.4233 | 1468.0548 | 1469.7883 |
| 1476.1309 | 1477.8046 | 1478.2654 |
| 1480.0648 | 1482.0153 | 1490.3286 |
| 1494.0872 | 1494.4489 | 1495.4391 |
| 1497.1692 | 1497.4226 | 1502.6733 |
| 1503.3802 | 1505.9449 | 1507.9461 |

|           |           |           |
|-----------|-----------|-----------|
| 1509.3994 | 1513.2060 | 1513.8278 |
| 1517.0343 | 1520.3321 | 1522.3611 |
| 1523.5862 | 1525.2325 | 1530.2722 |
| 1531.8134 | 1533.0782 | 1542.2055 |
| 1554.3974 | 1591.7601 | 1611.9990 |
| 1615.3592 | 1626.4371 | 1627.4154 |
| 1637.1217 | 1644.0273 | 1645.1355 |
| 1646.2102 | 1651.8583 | 1659.2136 |
| 1665.2741 | 1671.6308 | 1700.2707 |
| 1719.6782 | 1785.9209 | 3032.8793 |
| 3034.3282 | 3038.4124 | 3044.1623 |
| 3056.0038 | 3060.3292 | 3064.5386 |
| 3066.2253 | 3066.8184 | 3084.7395 |
| 3097.3725 | 3104.0477 | 3106.4677 |
| 3109.5604 | 3111.8383 | 3113.7281 |
| 3116.6553 | 3122.4493 | 3126.2190 |
| 3131.9891 | 3132.4680 | 3137.5682 |
| 3142.0021 | 3146.3620 | 3151.0951 |
| 3166.2269 | 3171.2890 | 3182.9484 |
| 3185.3654 | 3188.6418 | 3188.8588 |
| 3188.9389 | 3189.2321 | 3191.8108 |
| 3192.2790 | 3194.9756 | 3196.4997 |
| 3197.1450 | 3197.3906 | 3204.1307 |
| 3204.5251 | 3204.9280 | 3209.7007 |
| 3211.2288 | 3211.6750 | 3212.8847 |
| 3213.1507 | 3214.2305 | 3216.5675 |
| 3221.3966 | 3221.8404 | 3263.8307 |
| 3268.5978 | 3492.5490 | 3496.6970 |
| 3528.3195 | 3572.2189 | 3614.6193 |

**M4'**

Zero-point correction= 0.657136

Thermal correction to Energy= 0.695831

Thermal correction to Enthalpy= 0.696775

Thermal correction to Gibbs Free Energy= 0.584918

Sum of electronic and zero-point Energies= -1744.719425

Sum of electronic and thermal Energies= -1744.680730

Sum of electronic and thermal Enthalpies= -1744.679786

Sum of electronic and thermal Free Energies= -1744.791643

#### Cartesian coordinates

|   |           |           |           |
|---|-----------|-----------|-----------|
| C | -1.270558 | 0.437062  | -3.425247 |
| C | -0.291243 | -0.024212 | -2.583405 |
| C | -0.652565 | -0.526847 | -1.279032 |
| C | -2.042730 | -0.467192 | -0.948141 |
| C | -2.991825 | 0.016710  | -1.834944 |
| N | -2.594295 | 0.456577  | -3.068159 |
| H | -1.017995 | 0.814543  | -4.406227 |
| C | -2.454967 | -0.877711 | 0.430205  |
| C | -2.835638 | -2.230649 | 0.694502  |
| C | -2.389747 | 0.032162  | 1.476743  |
| C | -2.896210 | -3.212204 | -0.333897 |
| C | -3.166364 | -2.619335 | 2.035127  |
| C | -2.702741 | -0.364122 | 2.803597  |
| C | -3.272533 | -4.506220 | -0.052291 |
| H | -2.642656 | -2.924280 | -1.348433 |
| C | -3.553831 | -3.962964 | 2.290368  |
| C | -3.089863 | -1.654814 | 3.073480  |
| H | -2.647595 | 0.370178  | 3.601182  |
| C | -3.606717 | -4.886555 | 1.271270  |
| H | -3.314443 | -5.242846 | -0.848764 |
| H | -3.805963 | -4.248240 | 3.307922  |

|   |           |           |           |
|---|-----------|-----------|-----------|
| H | -3.340614 | -1.951056 | 4.087938  |
| H | -3.902903 | -5.910403 | 1.477842  |
| C | 0.323822  | -0.998586 | -0.374316 |
| O | 0.987492  | 0.023161  | -3.000096 |
| C | -4.447744 | 0.130251  | -1.485886 |
| H | -4.643015 | -0.343252 | -0.526009 |
| H | -4.739231 | 1.182146  | -1.403216 |
| H | -5.084967 | -0.343525 | -2.237695 |
| C | -1.990390 | 1.461400  | 1.213666  |
| O | -2.631832 | 2.164574  | 0.415230  |
| N | -0.919568 | 1.875882  | 1.924195  |
| H | -0.464400 | 1.163062  | 2.476764  |
| C | -0.225469 | 3.181113  | 1.875688  |
| C | -1.203005 | 4.374666  | 1.832238  |
| H | -1.991578 | 4.177899  | 2.576803  |
| H | -0.655438 | 5.257127  | 2.174605  |
| O | -1.748814 | 4.698696  | 0.568291  |
| H | -2.188792 | 3.871245  | 0.279432  |
| C | 0.940244  | 3.187962  | 0.830024  |
| C | 0.454344  | 2.904290  | -0.603373 |
| H | -0.106027 | 1.970365  | -0.652407 |
| H | -0.185834 | 3.707328  | -0.968971 |
| H | 1.315242  | 2.802853  | -1.273426 |
| C | 1.956932  | 2.097418  | 1.229241  |
| H | 2.811186  | 2.106499  | 0.544300  |
| H | 2.338227  | 2.255433  | 2.245128  |
| H | 1.517601  | 1.098199  | 1.173079  |
| C | 1.637969  | 4.560000  | 0.874022  |
| H | 1.962274  | 4.814119  | 1.890138  |
| H | 2.526993  | 4.546392  | 0.234842  |
| H | 0.978521  | 5.353927  | 0.512968  |

|   |           |           |           |
|---|-----------|-----------|-----------|
| C | 3.971289  | -1.093513 | -0.458602 |
| O | 4.258532  | -0.627609 | -1.559991 |
| O | 4.877275  | -1.485787 | 0.477054  |
| C | 2.620241  | -1.295468 | 0.043970  |
| N | 1.617871  | -0.939245 | -0.721036 |
| C | 6.322694  | -1.341319 | 0.264613  |
| C | 6.910783  | -1.881097 | 1.569939  |
| H | 6.614534  | -2.923118 | 1.722046  |
| H | 8.002875  | -1.830257 | 1.539532  |
| H | 6.557934  | -1.292240 | 2.421651  |
| C | 6.770018  | -2.197709 | -0.924131 |
| H | 6.451454  | -3.234822 | -0.780910 |
| H | 6.345367  | -1.822948 | -1.855136 |
| H | 7.861858  | -2.180634 | -0.997588 |
| C | 6.681314  | 0.137211  | 0.083106  |
| H | 6.265235  | 0.528998  | -0.844839 |
| H | 6.291711  | 0.723095  | 0.921409  |
| H | 7.769660  | 0.249910  | 0.061093  |
| C | -3.572942 | 0.975194  | -4.036506 |
| H | -3.040662 | 1.336001  | -4.914153 |
| H | -4.264377 | 0.186493  | -4.340556 |
| H | -4.136584 | 1.802016  | -3.601528 |
| H | 0.025945  | -1.376214 | 0.603672  |
| H | 0.248437  | 3.258547  | 2.862644  |
| H | 2.479209  | -1.695821 | 1.049041  |
| H | 1.544127  | -0.323023 | -2.225214 |

Vibrational frequencies

|         |         |         |
|---------|---------|---------|
| 7.6323  | 20.9085 | 24.3525 |
| 28.0912 | 31.1609 | 45.5748 |
| 52.4770 | 56.2269 | 58.8817 |

|          |          |          |
|----------|----------|----------|
| 64.4381  | 76.6981  | 97.2588  |
| 103.9772 | 111.6486 | 114.3522 |
| 123.3415 | 127.4669 | 142.5721 |
| 150.3607 | 164.1900 | 168.1515 |
| 180.6135 | 193.6506 | 196.5994 |
| 220.3826 | 224.7462 | 233.9126 |
| 241.7360 | 245.7141 | 252.0626 |
| 256.1848 | 265.2380 | 284.6775 |
| 291.1888 | 295.8552 | 306.7707 |
| 321.1856 | 323.7245 | 331.9584 |
| 334.7031 | 341.1737 | 355.3560 |
| 366.0623 | 373.2169 | 381.4738 |
| 386.6057 | 392.8093 | 396.1595 |
| 403.3456 | 411.0860 | 421.9982 |
| 437.4488 | 440.6310 | 450.3952 |
| 455.5680 | 471.0055 | 479.0199 |
| 480.0238 | 512.6072 | 526.2213 |
| 535.4347 | 548.1836 | 557.6899 |
| 566.4204 | 593.0640 | 600.0991 |
| 601.2591 | 644.1210 | 647.7448 |
| 657.0646 | 688.8322 | 699.7947 |
| 729.2917 | 730.5482 | 740.4042 |
| 750.1600 | 760.6841 | 761.7034 |
| 767.5951 | 774.2988 | 793.5459 |
| 795.4592 | 806.6659 | 816.0660 |
| 827.6276 | 837.0898 | 850.9338 |
| 856.2822 | 861.9825 | 878.0937 |
| 889.2740 | 893.1456 | 913.7782 |
| 926.4793 | 931.8661 | 934.9778 |
| 936.5255 | 941.9241 | 950.6754 |
| 957.2036 | 971.0831 | 975.3625 |

|           |           |           |
|-----------|-----------|-----------|
| 978.3677  | 983.2835  | 1006.1880 |
| 1009.2398 | 1024.6240 | 1029.3159 |
| 1049.0310 | 1054.2072 | 1057.2551 |
| 1061.4019 | 1068.9128 | 1073.5049 |
| 1081.7424 | 1095.9599 | 1117.3469 |
| 1133.7016 | 1138.9225 | 1143.5306 |
| 1157.5557 | 1182.0378 | 1188.3545 |
| 1204.2295 | 1215.3417 | 1225.1273 |
| 1233.5527 | 1246.5126 | 1252.6327 |
| 1262.6271 | 1267.0098 | 1272.8064 |
| 1284.6206 | 1286.4253 | 1292.5325 |
| 1293.5744 | 1311.7376 | 1317.9013 |
| 1335.9088 | 1349.5925 | 1351.7042 |
| 1376.4286 | 1383.3387 | 1387.4957 |
| 1405.4540 | 1406.0758 | 1409.6051 |
| 1410.4779 | 1411.7229 | 1414.4012 |
| 1417.7793 | 1421.9113 | 1425.2754 |
| 1433.2705 | 1446.1458 | 1465.6367 |
| 1468.3609 | 1470.9235 | 1478.7603 |
| 1478.8412 | 1488.6785 | 1490.9061 |
| 1494.8024 | 1495.2063 | 1495.5738 |
| 1498.0517 | 1499.3944 | 1501.1552 |
| 1504.7943 | 1507.6558 | 1509.9117 |
| 1512.7744 | 1517.2282 | 1518.8696 |
| 1525.0696 | 1529.1421 | 1533.8789 |
| 1536.2114 | 1552.1628 | 1561.0993 |
| 1569.8222 | 1571.5855 | 1585.5368 |
| 1613.2823 | 1645.1284 | 1672.4054 |
| 1694.7735 | 1703.6632 | 1720.7653 |
| 2841.1798 | 2983.1830 | 3032.5890 |
| 3035.6053 | 3039.3494 | 3048.9088 |



|           |           |           |
|-----------|-----------|-----------|
| 3051.3229 | 3056.7497 | 3057.2237 |
| 3059.8397 | 3076.0194 | 3098.6140 |
| 3100.2325 | 3104.2280 | 3120.2042 |
| 3121.3228 | 3121.5657 | 3123.0173 |
| 3126.2374 | 3127.9307 | 3133.7982 |
| 3134.1607 | 3134.6485 | 3140.9060 |
| 3151.9540 | 3165.0813 | 3168.1118 |
| 3176.4883 | 3181.2829 | 3183.1384 |
| 3187.2586 | 3187.5808 | 3192.7868 |
| 3204.9089 | 3205.4625 | 3214.5551 |
| 3253.2857 | 3529.3869 | 3626.3849 |

### **M05RR**

Zero-point correction= 0.960523

Thermal correction to Energy= 1.019145

Thermal correction to Enthalpy= 1.020089

Thermal correction to Gibbs Free Energy= 0.865913

Sum of electronic and zero-point Energies= -2949.546616

Sum of electronic and thermal Energies= -2949.487994

Sum of electronic and thermal Enthalpies= -2949.487050

Sum of electronic and thermal Free Energies= -2949.641226

### Cartesian coordinates

|   |           |           |           |
|---|-----------|-----------|-----------|
| C | -1.958281 | -3.152966 | -3.114436 |
| C | -0.855969 | -2.650743 | -2.400013 |
| C | -1.136058 | -2.210818 | -1.041201 |
| C | -2.450678 | -2.340575 | -0.527302 |
| C | -3.469610 | -2.924921 | -1.282052 |
| N | -3.194107 | -3.294773 | -2.568238 |
| H | -1.831109 | -3.474341 | -4.138945 |
| C | -2.744898 | -1.851127 | 0.859563  |

|   |           |           |           |
|---|-----------|-----------|-----------|
| C | -2.314430 | -2.622921 | 1.989235  |
| C | -3.359842 | -0.621807 | 1.064428  |
| C | -1.663377 | -3.880496 | 1.844817  |
| C | -2.527734 | -2.115149 | 3.313220  |
| C | -3.558091 | -0.128027 | 2.381265  |
| C | -1.238215 | -4.589546 | 2.945895  |
| H | -1.502158 | -4.276247 | 0.848398  |
| C | -2.080950 | -2.874253 | 4.429466  |
| C | -3.161900 | -0.855804 | 3.476057  |
| H | -4.027525 | 0.841723  | 2.508250  |
| C | -1.445880 | -4.082905 | 4.252513  |
| H | -0.740756 | -5.545412 | 2.813523  |
| H | -2.246386 | -2.477881 | 5.427414  |
| H | -3.318453 | -0.470346 | 4.479464  |
| H | -1.104779 | -4.651778 | 5.111931  |
| C | -0.066723 | -1.722487 | -0.233026 |
| H | -0.230282 | -1.381180 | 0.779322  |
| O | 0.314374  | -2.592090 | -2.926272 |
| C | -4.844100 | -3.199745 | -0.742959 |
| H | -4.879128 | -2.953472 | 0.316224  |
| H | -5.596275 | -2.584945 | -1.242520 |
| H | -5.114039 | -4.254295 | -0.858586 |
| C | -3.841183 | 0.218207  | -0.097839 |
| O | -4.655375 | -0.219384 | -0.919698 |
| N | -3.335731 | 1.472397  | -0.114680 |
| H | -2.542551 | 1.659836  | 0.507051  |
| C | -3.461773 | 2.332076  | -1.286592 |
| C | -2.112746 | 2.327805  | -2.044839 |
| H | -2.260764 | 2.732673  | -3.051022 |
| H | -1.382058 | 2.967342  | -1.534740 |
| O | -1.604970 | 1.006006  | -2.168652 |

|   |           |           |           |
|---|-----------|-----------|-----------|
| H | -0.935513 | 0.905068  | -1.462879 |
| C | -4.000078 | 3.745844  | -0.916753 |
| C | -4.109897 | 4.603420  | -2.192758 |
| H | -3.128279 | 4.838978  | -2.615553 |
| H | -4.699457 | 4.093693  | -2.963480 |
| H | -4.604712 | 5.554034  | -1.966522 |
| C | -3.089110 | 4.459671  | 0.102427  |
| H | -3.522839 | 5.428236  | 0.374242  |
| H | -2.968672 | 3.872776  | 1.017027  |
| H | -2.089560 | 4.649927  | -0.300960 |
| C | -5.404837 | 3.582044  | -0.305591 |
| H | -5.369489 | 2.967771  | 0.598887  |
| H | -5.824898 | 4.558407  | -0.040507 |
| H | -6.088272 | 3.100899  | -1.014546 |
| N | 1.190927  | -1.806962 | -0.664367 |
| C | 2.311345  | -1.490829 | -0.001909 |
| C | 3.580081  | -1.745865 | -0.628995 |
| O | 3.732348  | -2.233499 | -1.749742 |
| O | 4.586751  | -1.351913 | 0.198587  |
| C | 5.989619  | -1.693638 | -0.064262 |
| C | 6.493229  | -0.968426 | -1.315040 |
| H | 5.926339  | -1.275098 | -2.193395 |
| H | 6.397407  | 0.114103  | -1.191186 |
| H | 7.551839  | -1.199706 | -1.470009 |
| C | 6.697022  | -1.171990 | 1.187908  |
| H | 6.316801  | -1.676682 | 2.080913  |
| H | 7.773600  | -1.350800 | 1.115777  |
| H | 6.528471  | -0.096847 | 1.299987  |
| C | 6.142708  | -3.213425 | -0.180514 |
| H | 7.204510  | -3.472185 | -0.233839 |
| H | 5.712922  | -3.702098 | 0.699315  |

|   |           |           |           |
|---|-----------|-----------|-----------|
| H | 5.641848  | -3.588367 | -1.073147 |
| P | 0.380894  | 1.969881  | 1.156919  |
| O | -1.099710 | 1.969223  | 1.454182  |
| C | 1.130759  | 3.625347  | 1.208217  |
| C | 1.503477  | 4.181894  | 2.442039  |
| C | 1.246386  | 4.394301  | 0.038997  |
| C | 1.995671  | 5.485486  | 2.502771  |
| H | 1.420658  | 3.595204  | 3.351857  |
| C | 1.733772  | 5.699405  | 0.105698  |
| H | 0.963573  | 3.973908  | -0.920300 |
| C | 2.110465  | 6.244663  | 1.335584  |
| H | 2.290723  | 5.906514  | 3.458792  |
| H | 1.823008  | 6.287963  | -0.802001 |
| H | 2.494295  | 7.259075  | 1.384258  |
| C | 1.264540  | 0.915870  | 2.341477  |
| C | 0.518170  | -0.094569 | 2.968987  |
| C | 2.651505  | 0.985383  | 2.547198  |
| C | 1.156730  | -1.048869 | 3.760709  |
| H | -0.557466 | -0.126128 | 2.830345  |
| C | 3.286290  | 0.030137  | 3.342754  |
| H | 3.236488  | 1.780213  | 2.095582  |
| C | 2.542347  | -0.991961 | 3.938742  |
| H | 0.572015  | -1.834816 | 4.228341  |
| H | 4.360441  | 0.079692  | 3.488801  |
| H | 3.041988  | -1.739714 | 4.546889  |
| N | 0.684918  | 1.383687  | -0.424371 |
| C | 1.909329  | 1.226850  | -0.829059 |
| C | 2.313269  | 0.908144  | -2.195339 |
| C | 1.404772  | 0.565259  | -3.214398 |
| C | 3.688981  | 0.960474  | -2.488430 |
| C | 1.877160  | 0.282570  | -4.492720 |

|   |           |           |           |
|---|-----------|-----------|-----------|
| H | 0.342655  | 0.536055  | -3.010935 |
| C | 4.153308  | 0.686721  | -3.770130 |
| H | 4.390471  | 1.209111  | -1.698199 |
| C | 3.245516  | 0.345139  | -4.776348 |
| H | 1.174136  | 0.009697  | -5.273691 |
| H | 5.216954  | 0.729348  | -3.981433 |
| H | 3.603014  | 0.124430  | -5.777743 |
| H | 2.246647  | -1.173265 | 1.026586  |
| C | -4.254653 | -3.885299 | -3.406687 |
| H | -4.545942 | -4.860423 | -3.011973 |
| H | -5.124079 | -3.227847 | -3.426959 |
| H | -3.875036 | -4.007289 | -4.418543 |
| H | 2.755610  | 1.400655  | -0.155051 |
| H | 1.229044  | -2.146134 | -1.671544 |
| H | -4.200421 | 1.849260  | -1.933062 |

Vibrational frequencies

|          |          |          |
|----------|----------|----------|
| 14.8526  | 19.3616  | 23.1195  |
| 26.8212  | 29.4560  | 35.3146  |
| 36.8436  | 40.0713  | 40.6430  |
| 46.1156  | 47.1946  | 48.8656  |
| 54.7317  | 59.7712  | 60.8366  |
| 69.8374  | 70.3549  | 72.2344  |
| 74.9548  | 81.9698  | 84.0553  |
| 88.5561  | 102.2857 | 109.5193 |
| 110.1018 | 116.7745 | 122.1582 |
| 126.5902 | 131.7953 | 140.7778 |
| 146.9588 | 153.4175 | 157.9810 |
| 165.1967 | 167.6862 | 178.3859 |
| 185.5073 | 197.2940 | 200.7392 |
| 208.5421 | 214.5953 | 222.4345 |

|          |          |          |
|----------|----------|----------|
| 228.4860 | 237.3567 | 242.1342 |
| 243.9525 | 247.2247 | 256.8329 |
| 266.4291 | 270.0550 | 278.4608 |
| 281.3697 | 283.0151 | 291.5344 |
| 293.4782 | 296.1064 | 303.6894 |
| 310.8711 | 318.6389 | 319.5597 |
| 331.8221 | 341.1616 | 348.1874 |
| 363.3650 | 366.9992 | 376.7845 |
| 379.6605 | 383.7090 | 385.6683 |
| 386.7313 | 392.2989 | 403.0662 |
| 406.1275 | 408.4772 | 409.1535 |
| 415.2102 | 419.6186 | 420.7894 |
| 437.4715 | 442.5568 | 448.4118 |
| 454.6548 | 467.3913 | 479.6792 |
| 482.8082 | 485.6067 | 494.2829 |
| 518.3607 | 523.3419 | 526.7756 |
| 530.6324 | 534.6397 | 543.6243 |
| 554.0267 | 556.5283 | 563.0777 |
| 572.6102 | 591.0922 | 607.9136 |
| 621.8778 | 627.1021 | 630.3873 |
| 631.1460 | 642.8742 | 647.1539 |
| 661.0825 | 670.5149 | 696.5889 |
| 697.5494 | 702.1393 | 710.7513 |
| 715.1072 | 719.5187 | 736.8071 |
| 738.0865 | 740.4073 | 748.0346 |
| 765.6715 | 765.9695 | 767.2520 |
| 767.7737 | 768.9070 | 769.9544 |
| 774.6573 | 792.1452 | 793.6790 |
| 808.9274 | 814.8164 | 821.3455 |
| 823.2211 | 842.2720 | 848.7626 |
| 850.8390 | 858.4218 | 869.9624 |

|           |           |           |
|-----------|-----------|-----------|
| 874.9480  | 876.2560  | 886.2437  |
| 887.6992  | 891.8269  | 914.9213  |
| 916.9787  | 933.2933  | 933.3698  |
| 936.3834  | 937.9852  | 945.5739  |
| 947.4192  | 950.8431  | 960.9054  |
| 967.4615  | 972.0065  | 977.6248  |
| 979.1671  | 979.2334  | 981.6721  |
| 984.2013  | 993.1822  | 1002.1562 |
| 1005.3352 | 1007.6109 | 1012.2036 |
| 1013.9175 | 1014.4031 | 1018.3794 |
| 1019.3448 | 1027.3735 | 1030.6938 |
| 1039.4461 | 1050.6785 | 1051.7772 |
| 1052.2433 | 1056.0471 | 1056.1183 |
| 1058.4381 | 1064.9374 | 1069.1490 |
| 1081.7918 | 1083.7186 | 1094.8529 |
| 1110.3433 | 1114.9719 | 1119.5461 |
| 1123.5577 | 1126.7548 | 1137.8229 |
| 1138.1477 | 1144.2357 | 1147.0138 |
| 1154.6397 | 1163.9674 | 1182.4546 |
| 1182.8849 | 1187.2244 | 1194.7575 |
| 1196.6086 | 1197.1307 | 1205.4889 |
| 1218.3921 | 1219.1417 | 1220.3328 |
| 1221.9178 | 1225.0712 | 1236.2081 |
| 1245.6012 | 1252.1453 | 1253.2515 |
| 1254.3900 | 1269.3593 | 1272.9017 |
| 1275.7007 | 1279.7465 | 1286.9677 |
| 1288.1062 | 1295.8109 | 1327.2384 |
| 1327.4766 | 1331.7777 | 1334.6957 |
| 1352.1118 | 1354.2728 | 1356.2536 |
| 1362.0268 | 1363.4277 | 1365.1485 |
| 1377.1503 | 1387.3059 | 1396.5381 |

|           |           |           |
|-----------|-----------|-----------|
| 1401.2802 | 1407.7248 | 1407.9316 |
| 1408.3534 | 1410.9717 | 1417.7479 |
| 1420.3418 | 1421.4463 | 1424.6196 |
| 1433.0245 | 1434.8822 | 1436.9754 |
| 1445.6699 | 1462.2644 | 1463.9076 |
| 1469.9003 | 1473.6315 | 1477.8723 |
| 1478.8774 | 1479.8942 | 1480.6716 |
| 1487.7399 | 1492.8356 | 1493.9941 |
| 1495.0908 | 1496.6572 | 1498.2594 |
| 1500.8437 | 1501.6690 | 1505.9122 |
| 1508.4275 | 1508.9896 | 1511.9444 |
| 1512.6458 | 1518.2308 | 1519.3663 |
| 1524.0216 | 1526.4578 | 1526.9458 |
| 1533.2939 | 1540.5903 | 1546.9653 |
| 1550.6853 | 1567.1595 | 1581.6053 |
| 1606.4161 | 1608.6154 | 1619.6786 |
| 1623.3223 | 1626.4898 | 1640.4531 |
| 1641.9190 | 1645.1984 | 1646.2988 |
| 1656.9823 | 1670.7027 | 1673.7029 |
| 1713.7323 | 1720.3466 | 2776.2019 |
| 3031.3020 | 3035.0941 | 3038.8286 |
| 3045.7295 | 3047.8094 | 3052.0816 |
| 3058.0574 | 3059.0662 | 3069.4676 |
| 3079.5491 | 3083.7404 | 3096.1952 |
| 3100.0149 | 3104.4627 | 3107.4546 |
| 3112.7925 | 3118.5200 | 3119.9005 |
| 3122.5185 | 3126.4250 | 3129.0053 |
| 3130.6633 | 3132.9781 | 3163.0411 |
| 3164.3053 | 3174.0637 | 3178.6821 |
| 3182.2709 | 3186.6362 | 3187.1401 |
| 3188.2195 | 3190.9410 | 3192.7240 |



|           |           |           |
|-----------|-----------|-----------|
| 3194.2055 | 3194.3115 | 3195.4558 |
| 3197.6898 | 3201.9197 | 3202.8417 |
| 3205.4598 | 3206.2080 | 3208.9968 |
| 3209.8540 | 3213.2186 | 3213.5447 |
| 3216.3850 | 3217.4955 | 3218.2267 |
| 3241.9402 | 3250.2291 | 3256.6588 |
| 3297.4276 | 3345.0537 | 3577.9781 |

### **M05RR''**

Zero-point correction= 0.919395

Thermal correction to Energy= 0.975746

Thermal correction to Enthalpy= 0.976691

Thermal correction to Gibbs Free Energy= 0.829475

Sum of electronic and zero-point Energies= -2909.797867

Sum of electronic and thermal Energies= -2909.741515

Sum of electronic and thermal Enthalpies= -2909.740571

Sum of electronic and thermal Free Energies= -2909.887786

### Cartesian coordinates

|   |          |           |           |
|---|----------|-----------|-----------|
| C | 1.837229 | -3.509458 | 3.379942  |
| C | 0.731800 | -3.009384 | 2.627496  |
| C | 1.082538 | -2.456654 | 1.336597  |
| C | 2.440780 | -2.448850 | 0.932789  |
| C | 3.416590 | -3.008705 | 1.761370  |
| N | 3.103640 | -3.524419 | 2.973321  |
| H | 1.619948 | -3.931148 | 4.362480  |
| C | 2.803376 | -1.903700 | -0.412703 |
| C | 2.643616 | -2.753240 | -1.560246 |
| C | 3.221199 | -0.589712 | -0.594103 |
| C | 2.170752 | -4.091716 | -1.445281 |
| C | 2.945206 | -2.252288 | -2.869094 |

|   |           |           |           |
|---|-----------|-----------|-----------|
| C | 3.529828  | -0.112230 | -1.899672 |
| C | 1.994506  | -4.881664 | -2.559610 |
| H | 1.943179  | -4.481310 | -0.459715 |
| C | 2.756133  | -3.093210 | -3.999557 |
| C | 3.408494  | -0.918069 | -3.003389 |
| H | 3.868204  | 0.911314  | -2.014825 |
| C | 2.286006  | -4.378917 | -3.851538 |
| H | 1.628276  | -5.897901 | -2.449399 |
| H | 2.985676  | -2.698555 | -4.985627 |
| H | 3.649306  | -0.538035 | -3.992165 |
| H | 2.139956  | -5.011004 | -4.722232 |
| C | 0.052919  | -1.970253 | 0.469978  |
| H | 0.280467  | -1.574925 | -0.512618 |
| O | -0.480006 | -3.058881 | 3.063082  |
| C | 4.867246  | -3.050843 | 1.348053  |
| H | 4.998981  | -3.538271 | 0.374631  |
| H | 5.263117  | -2.033703 | 1.264818  |
| H | 5.446671  | -3.601186 | 2.093163  |
| C | 3.411445  | 0.368541  | 0.561372  |
| O | 4.018777  | 0.050195  | 1.591555  |
| N | 2.922349  | 1.610637  | 0.331748  |
| H | 2.302365  | 1.753167  | -0.472248 |
| C | 3.178429  | 2.756224  | 1.201376  |
| C | 1.865289  | 3.540063  | 1.367483  |
| H | 2.041117  | 4.428230  | 1.979150  |
| H | 1.510019  | 3.880573  | 0.384698  |
| O | 0.864336  | 2.782814  | 2.030786  |
| H | 0.544254  | 2.093325  | 1.410925  |
| C | 4.376596  | 3.620587  | 0.680263  |
| C | 4.727223  | 4.701989  | 1.722189  |
| H | 3.926120  | 5.436022  | 1.848695  |

|   |           |           |           |
|---|-----------|-----------|-----------|
| H | 4.934680  | 4.253683  | 2.700611  |
| H | 5.622845  | 5.249600  | 1.409533  |
| C | 4.037954  | 4.286647  | -0.667385 |
| H | 4.922395  | 4.788951  | -1.074077 |
| H | 3.704144  | 3.546539  | -1.402113 |
| H | 3.249601  | 5.039199  | -0.566845 |
| C | 5.611774  | 2.717122  | 0.493371  |
| H | 5.458920  | 1.989119  | -0.307991 |
| H | 6.484557  | 3.323912  | 0.229013  |
| H | 5.838467  | 2.162037  | 1.408250  |
| N | -1.218115 | -2.026917 | 0.826703  |
| C | -2.282883 | -1.564517 | 0.116549  |
| C | -3.590655 | -1.697379 | 0.662260  |
| O | -3.867514 | -2.167111 | 1.772549  |
| O | -4.511461 | -1.170946 | -0.210131 |
| C | -5.947804 | -1.245858 | 0.040249  |
| C | -6.319350 | -0.399676 | 1.262382  |
| H | -5.829056 | -0.783735 | 2.156622  |
| H | -6.012739 | 0.639474  | 1.106607  |
| H | -7.403962 | -0.415622 | 1.409976  |
| C | -6.543074 | -0.640392 | -1.233669 |
| H | -6.258602 | -1.233687 | -2.107915 |
| H | -7.634748 | -0.615796 | -1.168416 |
| H | -6.178401 | 0.381386  | -1.376084 |
| C | -6.389362 | -2.705419 | 0.196241  |
| H | -7.481950 | -2.758708 | 0.233816  |
| H | -6.045627 | -3.292720 | -0.661087 |
| H | -5.979987 | -3.140251 | 1.107804  |
| P | -0.446292 | 1.771460  | -1.354888 |
| O | 1.010288  | 2.029464  | -1.682963 |
| C | -1.451878 | 3.288560  | -1.417080 |

|   |           |           |           |
|---|-----------|-----------|-----------|
| C | -2.011331 | 3.737489  | -2.622890 |
| C | -1.571092 | 4.078287  | -0.260293 |
| C | -2.697868 | 4.951614  | -2.668546 |
| H | -1.919717 | 3.137158  | -3.522873 |
| C | -2.252669 | 5.293932  | -0.313976 |
| H | -1.123301 | 3.749318  | 0.673123  |
| C | -2.820102 | 5.729208  | -1.514591 |
| H | -3.136511 | 5.288597  | -3.602683 |
| H | -2.342744 | 5.900358  | 0.582075  |
| H | -3.355122 | 6.673361  | -1.551030 |
| C | -1.159913 | 0.543386  | -2.482620 |
| C | -0.281900 | -0.433653 | -2.980138 |
| C | -2.536606 | 0.431918  | -2.728780 |
| C | -0.777583 | -1.521121 | -3.698491 |
| H | 0.782442  | -0.338285 | -2.792620 |
| C | -3.027092 | -0.650835 | -3.460604 |
| H | -3.226811 | 1.174709  | -2.342632 |
| C | -2.151432 | -1.630357 | -3.936409 |
| H | -0.091825 | -2.280066 | -4.063425 |
| H | -4.093712 | -0.737262 | -3.640875 |
| H | -2.539761 | -2.478805 | -4.491632 |
| N | -0.604590 | 1.170027  | 0.220224  |
| C | -1.770576 | 0.956207  | 0.774684  |
| C | -1.891684 | 0.664236  | 2.200974  |
| C | -0.784186 | 0.254180  | 2.965843  |
| C | -3.143388 | 0.806058  | 2.826704  |
| C | -0.930918 | 0.002244  | 4.325982  |
| H | 0.177303  | 0.123788  | 2.484774  |
| C | -3.281113 | 0.571630  | 4.191511  |
| H | -4.002646 | 1.106551  | 2.236274  |
| C | -2.173705 | 0.168139  | 4.944696  |

|   |           |           |           |
|---|-----------|-----------|-----------|
| H | -0.075481 | -0.333730 | 4.903343  |
| H | -4.249731 | 0.694758  | 4.666470  |
| H | -2.281450 | -0.024692 | 6.008055  |
| H | -2.127250 | -1.269579 | -0.906896 |
| H | -2.712757 | 1.139479  | 0.248642  |
| H | -1.329822 | -2.412034 | 1.805265  |
| H | 3.454167  | 2.353956  | 2.181395  |

Vibrational frequencies

|          |          |          |
|----------|----------|----------|
| 19.3230  | 24.9799  | 29.9421  |
| 31.9922  | 36.1301  | 40.8111  |
| 43.2290  | 44.6477  | 50.2870  |
| 52.8479  | 56.1640  | 59.4716  |
| 61.7416  | 64.5560  | 67.8822  |
| 70.8028  | 78.5962  | 80.5062  |
| 87.0012  | 90.3451  | 95.6275  |
| 98.8131  | 106.5679 | 107.9984 |
| 111.0840 | 132.7366 | 140.3395 |
| 143.6237 | 145.0022 | 148.2350 |
| 153.6496 | 160.6495 | 166.4714 |
| 176.7497 | 185.9553 | 192.4994 |
| 198.8181 | 203.1450 | 209.8916 |
| 220.9900 | 228.5391 | 231.4068 |
| 235.9738 | 243.7655 | 249.7985 |
| 263.2656 | 266.1526 | 269.7269 |
| 279.7630 | 283.0014 | 285.0789 |
| 288.5610 | 297.3441 | 303.7472 |
| 306.0303 | 317.9810 | 322.5919 |
| 333.0964 | 340.7561 | 351.9161 |
| 355.0302 | 362.8546 | 365.3391 |
| 372.7631 | 376.6189 | 382.2168 |

|           |           |           |
|-----------|-----------|-----------|
| 385.8871  | 390.2682  | 393.4224  |
| 399.8199  | 402.1561  | 411.8012  |
| 418.7271  | 421.3479  | 424.8362  |
| 437.5247  | 446.5264  | 451.7125  |
| 459.3719  | 468.8720  | 481.8026  |
| 486.6346  | 490.1911  | 509.9739  |
| 513.5262  | 523.1551  | 528.9546  |
| 530.3609  | 532.3288  | 542.6664  |
| 545.3173  | 550.8975  | 566.3026  |
| 572.6863  | 606.2073  | 607.2948  |
| 618.3197  | 629.5797  | 631.0151  |
| 631.9982  | 653.9616  | 674.6881  |
| 686.5616  | 695.1337  | 700.3251  |
| 704.0286  | 714.8063  | 716.4474  |
| 719.4912  | 724.0220  | 727.9666  |
| 739.2806  | 745.9514  | 760.6741  |
| 766.8882  | 767.9092  | 768.4291  |
| 769.1426  | 769.7255  | 774.9564  |
| 784.2527  | 792.4812  | 801.1606  |
| 809.0772  | 823.0097  | 833.2213  |
| 845.9282  | 847.9600  | 860.9607  |
| 870.1566  | 872.9578  | 881.6890  |
| 882.0461  | 884.4453  | 886.9875  |
| 893.5925  | 904.3258  | 909.9152  |
| 920.9621  | 929.2296  | 932.7637  |
| 935.6616  | 943.6692  | 944.6663  |
| 953.4773  | 954.3094  | 958.2722  |
| 964.4273  | 967.0965  | 972.3342  |
| 973.8861  | 979.1693  | 979.1928  |
| 984.8530  | 999.8111  | 1001.0852 |
| 1003.8130 | 1007.6544 | 1011.6344 |

|           |           |           |
|-----------|-----------|-----------|
| 1014.1215 | 1014.9807 | 1021.1370 |
| 1022.9720 | 1031.0660 | 1033.6762 |
| 1039.8412 | 1049.6709 | 1050.9656 |
| 1053.0426 | 1053.1368 | 1056.3850 |
| 1061.9237 | 1063.7429 | 1067.2547 |
| 1086.9679 | 1105.6168 | 1106.9924 |
| 1111.5163 | 1115.1258 | 1116.7825 |
| 1118.8839 | 1119.5667 | 1136.5311 |
| 1137.3549 | 1166.7507 | 1169.6414 |
| 1178.5602 | 1182.3155 | 1191.6151 |
| 1194.5464 | 1196.6809 | 1198.2558 |
| 1205.3591 | 1211.6642 | 1215.2355 |
| 1222.1481 | 1224.2419 | 1226.2808 |
| 1239.1459 | 1247.5419 | 1250.4799 |
| 1255.6568 | 1263.5977 | 1268.7293 |
| 1270.0293 | 1270.7581 | 1281.5517 |
| 1284.7230 | 1290.6139 | 1316.4027 |
| 1324.6007 | 1325.5250 | 1328.8780 |
| 1333.1507 | 1340.0143 | 1341.3707 |
| 1354.7114 | 1361.7686 | 1369.2203 |
| 1372.4940 | 1380.7486 | 1390.1470 |
| 1395.7381 | 1399.2692 | 1404.5915 |
| 1408.5458 | 1409.1838 | 1412.4553 |
| 1413.0603 | 1416.4303 | 1426.1342 |
| 1430.8289 | 1433.3354 | 1433.5431 |
| 1444.5216 | 1463.6876 | 1472.2525 |
| 1477.4151 | 1479.7698 | 1480.5403 |
| 1483.4087 | 1488.2558 | 1488.9030 |
| 1493.2588 | 1494.0579 | 1495.4402 |
| 1497.7148 | 1499.2971 | 1500.8822 |
| 1501.2235 | 1505.2730 | 1512.0345 |

|           |           |           |
|-----------|-----------|-----------|
| 1514.8784 | 1516.6498 | 1517.8303 |
| 1518.4274 | 1522.7671 | 1527.7250 |
| 1531.3717 | 1534.7307 | 1536.7932 |
| 1547.6052 | 1553.2820 | 1573.4402 |
| 1605.1390 | 1614.6673 | 1615.2210 |
| 1622.6105 | 1626.5016 | 1633.9430 |
| 1642.4293 | 1645.7209 | 1646.7419 |
| 1654.3374 | 1657.5193 | 1670.4774 |
| 1694.6166 | 1713.5380 | 2861.7843 |
| 3020.4647 | 3033.6879 | 3033.7909 |
| 3038.5004 | 3045.4393 | 3045.6272 |
| 3048.1371 | 3054.5952 | 3079.5793 |
| 3082.4336 | 3098.6969 | 3101.4892 |
| 3104.8720 | 3108.4944 | 3113.6047 |
| 3115.2419 | 3116.0540 | 3118.4297 |
| 3119.0734 | 3123.8699 | 3126.8606 |
| 3128.7637 | 3130.3158 | 3134.4975 |
| 3165.5978 | 3168.9383 | 3179.9492 |
| 3183.0264 | 3185.3534 | 3185.7776 |
| 3187.9895 | 3190.6207 | 3190.8017 |
| 3194.5748 | 3196.1538 | 3197.0744 |
| 3203.1787 | 3204.4456 | 3204.7856 |
| 3204.8187 | 3212.8161 | 3213.1813 |
| 3213.4389 | 3214.2570 | 3216.8732 |
| 3219.3852 | 3226.8574 | 3232.3596 |
| 3309.9235 | 3341.1090 | 3508.1011 |

### **M5RR''**

Zero-point correction= 0.921627

Thermal correction to Energy= 0.977358

Thermal correction to Enthalpy= 0.978303



Thermal correction to Gibbs Free Energy= 0.829804

Sum of electronic and zero-point Energies= -2909.810718

Sum of electronic and thermal Energies= -2909.754986

Sum of electronic and thermal Enthalpies= -2909.754042

Sum of electronic and thermal Free Energies= -2909.902541

Cartesian coordinates

|   |          |           |           |
|---|----------|-----------|-----------|
| C | 2.433703 | -2.527843 | 3.984902  |
| C | 1.259842 | -2.270934 | 3.185787  |
| C | 1.544491 | -1.925885 | 1.807478  |
| C | 2.896740 | -1.857637 | 1.361403  |
| C | 3.925479 | -2.151491 | 2.243571  |
| N | 3.673528 | -2.480506 | 3.544757  |
| H | 2.272367 | -2.792196 | 5.030555  |
| C | 3.195574 | -1.502626 | -0.060385 |
| C | 3.217187 | -2.545389 | -1.044840 |
| C | 3.404224 | -0.186406 | -0.450944 |
| C | 2.945787 | -3.903217 | -0.713576 |
| C | 3.504479 | -2.222838 | -2.412022 |
| C | 3.684264 | 0.118131  | -1.811588 |
| C | 2.950479 | -4.883607 | -1.680962 |
| H | 2.727222 | -4.157384 | 0.317636  |
| C | 3.509102 | -3.259009 | -3.385049 |
| C | 3.751982 | -0.869942 | -2.761982 |
| H | 3.844621 | 1.153383  | -2.090926 |
| C | 3.233925 | -4.561011 | -3.030873 |
| H | 2.735477 | -5.912501 | -1.408801 |
| H | 3.726533 | -3.001440 | -4.418048 |
| H | 3.973047 | -0.624399 | -3.796864 |
| H | 3.233805 | -5.343380 | -3.783690 |
| C | 0.475181 | -1.676434 | 0.908080  |

|   |           |           |           |
|---|-----------|-----------|-----------|
| H | 0.668905  | -1.402493 | -0.121685 |
| O | 0.083543  | -2.357772 | 3.669424  |
| C | 5.371944  | -2.076168 | 1.825392  |
| H | 5.568975  | -2.676381 | 0.930139  |
| H | 5.632402  | -1.038151 | 1.593373  |
| H | 6.011747  | -2.434419 | 2.634813  |
| C | 3.379375  | 0.954546  | 0.542790  |
| O | 4.038683  | 0.917586  | 1.592309  |
| N | 2.634232  | 2.005542  | 0.145532  |
| H | 2.002107  | 1.889628  | -0.661757 |
| C | 2.554541  | 3.263410  | 0.882651  |
| C | 1.073055  | 3.677420  | 0.981857  |
| H | 1.006142  | 4.648991  | 1.483192  |
| H | 0.662295  | 3.804734  | -0.029462 |
| O | 0.306299  | 2.756025  | 1.728840  |
| H | 0.005775  | 2.025665  | 1.117390  |
| C | 3.488440  | 4.353629  | 0.256746  |
| C | 3.536229  | 5.588977  | 1.178107  |
| H | 2.565874  | 6.087580  | 1.256619  |
| H | 3.858926  | 5.314413  | 2.189047  |
| H | 4.249464  | 6.323443  | 0.788059  |
| C | 2.996278  | 4.767368  | -1.143814 |
| H | 3.726785  | 5.428336  | -1.623439 |
| H | 2.855005  | 3.892405  | -1.786281 |
| H | 2.044250  | 5.305635  | -1.098651 |
| C | 4.918133  | 3.789058  | 0.137514  |
| H | 4.964253  | 2.969088  | -0.584537 |
| H | 5.606808  | 4.571152  | -0.200809 |
| H | 5.272529  | 3.405468  | 1.098991  |
| N | -0.781142 | -1.785491 | 1.275270  |
| C | -1.870785 | -1.336491 | 0.452653  |

|   |           |           |           |
|---|-----------|-----------|-----------|
| C | -3.164357 | -1.966165 | 0.931402  |
| O | -3.282330 | -2.579051 | 1.977072  |
| O | -4.127980 | -1.704071 | 0.045286  |
| C | -5.522618 | -2.173529 | 0.219121  |
| C | -6.114936 | -1.598446 | 1.506517  |
| H | -5.622742 | -2.012171 | 2.386588  |
| H | -6.006637 | -0.511136 | 1.522555  |
| H | -7.180683 | -1.841802 | 1.548728  |
| C | -6.212142 | -1.591919 | -1.013993 |
| H | -5.743776 | -1.969259 | -1.927501 |
| H | -7.268414 | -1.874065 | -1.019294 |
| H | -6.141129 | -0.500417 | -1.011672 |
| C | -5.538728 | -3.702332 | 0.196719  |
| H | -6.574429 | -4.054309 | 0.200404  |
| H | -5.051010 | -4.071401 | -0.710268 |
| H | -5.025482 | -4.110917 | 1.067956  |
| P | -0.585576 | 1.279057  | -1.537129 |
| O | 0.800153  | 1.792297  | -1.920020 |
| C | -1.859173 | 2.550078  | -1.907359 |
| C | -2.326866 | 2.794398  | -3.207144 |
| C | -2.320774 | 3.353475  | -0.852218 |
| C | -3.244985 | 3.818104  | -3.448240 |
| H | -1.981477 | 2.176581  | -4.031551 |
| C | -3.235299 | 4.379769  | -1.094523 |
| H | -1.954912 | 3.168067  | 0.153578  |
| C | -3.700620 | 4.611687  | -2.391572 |
| H | -3.605819 | 3.995819  | -4.457219 |
| H | -3.587876 | 4.995149  | -0.271716 |
| H | -4.416401 | 5.406831  | -2.579133 |
| C | -0.996874 | -0.167908 | -2.589977 |
| C | 0.058736  | -1.048613 | -2.881082 |

|   |           |           |           |
|---|-----------|-----------|-----------|
| C | -2.307966 | -0.549116 | -2.914755 |
| C | -0.190136 | -2.291007 | -3.464023 |
| H | 1.074191  | -0.753002 | -2.638632 |
| C | -2.557717 | -1.791161 | -3.504327 |
| H | -3.138456 | 0.115502  | -2.697660 |
| C | -1.502041 | -2.666077 | -3.772734 |
| H | 0.637882  | -2.963612 | -3.669173 |
| H | -3.577420 | -2.077314 | -3.745899 |
| H | -1.700292 | -3.635381 | -4.220704 |
| N | -0.718853 | 0.848332  | 0.027450  |
| C | -1.969826 | 0.263558  | 0.448131  |
| C | -2.426572 | 0.757925  | 1.810866  |
| C | -1.590250 | 0.702529  | 2.935046  |
| C | -3.725397 | 1.258510  | 1.965143  |
| C | -2.053477 | 1.116158  | 4.183704  |
| H | -0.570725 | 0.352931  | 2.830297  |
| C | -4.190217 | 1.681083  | 3.213107  |
| H | -4.375590 | 1.322830  | 1.096768  |
| C | -3.355587 | 1.603830  | 4.329324  |
| H | -1.394038 | 1.061164  | 5.045286  |
| H | -5.200295 | 2.068845  | 3.310439  |
| H | -3.712450 | 1.927275  | 5.302890  |
| H | -1.698987 | -1.634442 | -0.582830 |
| H | -2.801203 | 0.448920  | -0.246976 |
| H | -0.917403 | -2.029199 | 2.275221  |
| H | 2.911636  | 3.057593  | 1.897082  |

#### Vibrational frequencies

|         |         |         |
|---------|---------|---------|
| 12.4805 | 15.1916 | 21.0840 |
| 26.6271 | 28.0744 | 32.9869 |
| 36.0233 | 37.6878 | 42.5459 |

|          |          |          |
|----------|----------|----------|
| 47.4818  | 51.8802  | 54.7115  |
| 58.1445  | 63.1131  | 65.4573  |
| 68.0974  | 73.0213  | 82.2326  |
| 86.1882  | 87.4301  | 93.4404  |
| 98.6617  | 107.6086 | 109.5393 |
| 117.8091 | 125.0948 | 132.6677 |
| 138.8552 | 145.3329 | 155.7021 |
| 158.3530 | 172.1769 | 177.0153 |
| 183.7058 | 193.5298 | 195.7906 |
| 206.0471 | 215.2750 | 223.5749 |
| 223.7293 | 227.4016 | 233.4497 |
| 243.6861 | 248.0186 | 262.0671 |
| 264.2881 | 269.3056 | 273.3263 |
| 278.7424 | 282.6066 | 285.5750 |
| 286.5491 | 299.8151 | 307.4823 |
| 314.9326 | 318.8509 | 331.1445 |
| 342.2492 | 347.9070 | 357.9477 |
| 366.6486 | 369.8297 | 372.4150 |
| 380.5901 | 391.5185 | 394.6779 |
| 397.1050 | 400.7612 | 404.2937 |
| 412.0372 | 419.7317 | 423.4058 |
| 424.1575 | 437.6772 | 444.4530 |
| 448.8881 | 453.0120 | 457.1462 |
| 472.1647 | 482.6290 | 485.8725 |
| 508.7990 | 510.7033 | 518.5590 |
| 525.3235 | 527.7947 | 532.9671 |
| 541.1314 | 546.3359 | 554.9734 |
| 565.7663 | 571.4564 | 585.6127 |
| 599.5433 | 607.8259 | 630.1445 |
| 631.6833 | 632.7721 | 648.2077 |
| 654.0140 | 677.3565 | 687.4852 |

|           |           |           |
|-----------|-----------|-----------|
| 695.5666  | 705.0281  | 712.5011  |
| 717.3145  | 718.8567  | 728.1529  |
| 733.6155  | 747.9975  | 755.5604  |
| 766.9175  | 767.9429  | 768.5356  |
| 775.5282  | 780.5646  | 785.1613  |
| 788.8203  | 796.9846  | 808.8925  |
| 810.6318  | 819.7178  | 823.5061  |
| 835.5081  | 846.6739  | 855.5400  |
| 858.0873  | 879.8040  | 883.2221  |
| 884.9260  | 891.2795  | 895.5823  |
| 906.4435  | 909.7630  | 911.2133  |
| 917.6272  | 922.5735  | 926.8192  |
| 936.4776  | 938.5215  | 940.4850  |
| 944.5733  | 945.3515  | 947.9621  |
| 953.5779  | 954.6444  | 966.6407  |
| 968.4283  | 971.9683  | 974.6418  |
| 977.8454  | 980.3575  | 996.1016  |
| 996.5235  | 1000.7709 | 1000.8539 |
| 1004.8299 | 1011.8536 | 1013.6510 |
| 1015.6851 | 1018.0233 | 1019.6767 |
| 1023.6604 | 1026.1042 | 1035.4584 |
| 1049.4198 | 1051.0029 | 1052.2250 |
| 1056.3199 | 1056.5436 | 1060.9543 |
| 1062.3373 | 1068.6103 | 1096.7936 |
| 1101.3162 | 1103.0349 | 1103.6839 |
| 1109.2347 | 1111.3730 | 1115.3941 |
| 1117.2633 | 1129.7199 | 1137.7637 |
| 1141.0431 | 1149.2877 | 1174.9170 |
| 1183.4760 | 1188.4540 | 1189.8944 |
| 1191.8766 | 1192.1723 | 1195.4119 |
| 1207.1479 | 1212.1083 | 1213.6225 |

|           |           |           |
|-----------|-----------|-----------|
| 1215.4655 | 1216.9444 | 1222.2768 |
| 1230.1855 | 1248.2130 | 1249.0314 |
| 1250.9120 | 1261.3828 | 1270.2690 |
| 1276.7913 | 1278.2528 | 1289.6172 |
| 1291.4295 | 1294.9012 | 1321.5897 |
| 1322.2743 | 1328.8779 | 1329.6160 |
| 1338.6077 | 1344.9786 | 1346.6222 |
| 1354.6216 | 1358.8404 | 1362.9477 |
| 1363.8163 | 1367.1688 | 1385.5586 |
| 1392.2465 | 1399.2501 | 1408.4708 |
| 1409.7978 | 1410.5344 | 1412.8437 |
| 1415.0378 | 1418.0706 | 1422.7754 |
| 1426.7974 | 1428.8075 | 1431.1728 |
| 1436.9399 | 1445.3241 | 1461.8162 |
| 1465.6176 | 1470.9270 | 1475.3597 |
| 1479.2544 | 1486.5863 | 1489.0332 |
| 1493.8540 | 1494.1524 | 1495.3560 |
| 1497.4592 | 1498.1124 | 1499.3129 |
| 1502.0343 | 1505.8295 | 1508.0699 |
| 1510.5558 | 1515.4212 | 1517.8968 |
| 1521.1390 | 1522.2854 | 1526.0872 |
| 1528.1846 | 1530.8878 | 1536.9981 |
| 1551.7113 | 1566.7022 | 1569.7867 |
| 1609.9755 | 1620.6228 | 1625.0810 |
| 1628.9572 | 1636.6370 | 1636.9786 |
| 1641.7964 | 1644.1844 | 1646.9211 |
| 1657.3606 | 1670.7978 | 1686.3215 |
| 1708.6978 | 1780.9707 | 3004.8235 |
| 3013.0749 | 3032.7731 | 3036.3843 |
| 3039.0201 | 3042.9642 | 3050.8397 |
| 3057.0031 | 3065.4145 | 3067.7547 |

|           |           |           |
|-----------|-----------|-----------|
| 3081.1443 | 3099.7115 | 3101.7488 |
| 3104.5213 | 3110.8087 | 3116.3911 |
| 3118.4622 | 3122.6064 | 3125.9381 |
| 3127.3506 | 3129.5811 | 3134.8764 |
| 3137.7882 | 3139.0616 | 3139.8750 |
| 3142.9116 | 3154.6273 | 3159.9312 |
| 3168.3379 | 3173.3679 | 3176.9783 |
| 3179.0767 | 3180.1899 | 3180.9406 |
| 3182.9882 | 3185.6317 | 3188.7529 |
| 3190.2160 | 3190.8019 | 3191.2201 |
| 3197.0427 | 3197.9906 | 3202.7611 |
| 3204.6803 | 3204.9156 | 3206.1104 |
| 3213.7157 | 3215.7853 | 3216.3168 |
| 3218.3668 | 3230.6078 | 3241.2709 |

#### **TS5RR'**

Zero-point correction= 0.960919

Thermal correction to Energy= 1.018079

Thermal correction to Enthalpy= 1.019023

Thermal correction to Gibbs Free Energy= 0.868677

Sum of electronic and zero-point Energies= -2949.539571

Sum of electronic and thermal Energies= -2949.482411

Sum of electronic and thermal Enthalpies= -2949.481467

Sum of electronic and thermal Free Energies= -2949.631813

#### Cartesian coordinates

|   |          |           |          |
|---|----------|-----------|----------|
| C | 2.594766 | -2.327905 | 3.489617 |
| C | 1.449956 | -2.103759 | 2.746878 |
| C | 1.581251 | -1.830457 | 1.350714 |
| C | 2.879819 | -1.814832 | 0.799137 |
| C | 4.001222 | -2.108228 | 1.582332 |



|   |          |           |           |
|---|----------|-----------|-----------|
| N | 3.824671 | -2.337484 | 2.914346  |
| H | 2.536195 | -2.517932 | 4.551795  |
| C | 3.070100 | -1.446661 | -0.640502 |
| C | 2.844753 | -2.422589 | -1.663410 |
| C | 3.421014 | -0.147815 | -0.984129 |
| C | 2.448451 | -3.757284 | -1.369579 |
| C | 3.015456 | -2.046363 | -3.036672 |
| C | 3.565327 | 0.214849  | -2.348763 |
| C | 2.227717 | -4.667544 | -2.379104 |
| H | 2.319105 | -4.054651 | -0.334628 |
| C | 2.787456 | -3.012672 | -4.053715 |
| C | 3.384561 | -0.711016 | -3.346617 |
| H | 3.823963 | 1.240038  | -2.590309 |
| C | 2.398816 | -4.294627 | -3.734890 |
| H | 1.921690 | -5.680222 | -2.135516 |
| H | 2.919241 | -2.716971 | -5.090738 |
| H | 3.505672 | -0.427509 | -4.388091 |
| H | 2.222355 | -5.022966 | -4.520233 |
| C | 0.395732 | -1.613212 | 0.545535  |
| H | 0.506149 | -1.388543 | -0.512065 |
| O | 0.269823 | -2.145081 | 3.369926  |
| C | 5.390646 | -2.189165 | 1.024460  |
| H | 5.354321 | -2.136994 | -0.061503 |
| H | 5.992259 | -1.346735 | 1.373922  |
| H | 5.881768 | -3.123578 | 1.309130  |
| C | 3.669981 | 0.894531  | 0.082697  |
| O | 4.512242 | 0.710141  | 0.972448  |
| N | 2.928142 | 2.012867  | -0.056190 |
| H | 2.135129 | 1.961695  | -0.711288 |
| C | 2.820226 | 2.984999  | 1.026168  |
| C | 1.481925 | 2.745551  | 1.773122  |

|   |           |           |           |
|---|-----------|-----------|-----------|
| H | 1.527141  | 3.240442  | 2.750199  |
| H | 0.649506  | 3.192323  | 1.214911  |
| O | 1.244996  | 1.361764  | 1.967062  |
| H | 0.569162  | 1.112538  | 1.288592  |
| C | 3.034989  | 4.442534  | 0.522288  |
| C | 2.914842  | 5.415706  | 1.711519  |
| H | 1.896838  | 5.447865  | 2.111981  |
| H | 3.591765  | 5.132752  | 2.526036  |
| H | 3.176054  | 6.431594  | 1.395973  |
| C | 2.011238  | 4.833139  | -0.562774 |
| H | 2.226455  | 5.842428  | -0.930848 |
| H | 2.041917  | 4.146380  | -1.412532 |
| H | 0.985968  | 4.835167  | -0.179605 |
| C | 4.454180  | 4.548102  | -0.067605 |
| H | 4.576750  | 3.866808  | -0.914712 |
| H | 4.651641  | 5.567648  | -0.416763 |
| H | 5.212331  | 4.294429  | 0.682256  |
| N | -0.775931 | -1.780762 | 1.098076  |
| C | -1.922340 | -1.506671 | 0.411898  |
| C | -3.165834 | -2.053194 | 0.993237  |
| O | -3.270831 | -2.561622 | 2.099544  |
| O | -4.179383 | -1.858555 | 0.119458  |
| C | -5.521909 | -2.427168 | 0.326365  |
| C | -6.182081 | -1.826520 | 1.569483  |
| H | -5.621526 | -2.079813 | 2.468700  |
| H | -6.238756 | -0.738626 | 1.485729  |
| H | -7.200412 | -2.217293 | 1.659681  |
| C | -6.257423 | -1.998401 | -0.943932 |
| H | -5.758038 | -2.402246 | -1.829354 |
| H | -7.287957 | -2.363887 | -0.924306 |
| H | -6.275059 | -0.907498 | -1.023998 |

|   |           |           |           |
|---|-----------|-----------|-----------|
| C | -5.417463 | -3.952418 | 0.410027  |
| H | -6.420989 | -4.387873 | 0.426722  |
| H | -4.886865 | -4.341538 | -0.464246 |
| H | -4.886431 | -4.258500 | 1.312035  |
| P | -0.685516 | 1.516357  | -1.398353 |
| O | 0.753307  | 1.848063  | -1.750915 |
| C | -1.786793 | 2.954062  | -1.642008 |
| C | -2.114734 | 3.379434  | -2.938976 |
| C | -2.241458 | 3.694519  | -0.540578 |
| C | -2.887969 | 4.524309  | -3.130723 |
| H | -1.774219 | 2.809379  | -3.798812 |
| C | -3.011320 | 4.842781  | -0.734568 |
| H | -1.997104 | 3.364670  | 0.463916  |
| C | -3.335702 | 5.257886  | -2.028153 |
| H | -3.142562 | 4.843084  | -4.137029 |
| H | -3.360955 | 5.409553  | 0.123165  |
| H | -3.938032 | 6.148982  | -2.177902 |
| C | -1.297593 | 0.212508  | -2.521086 |
| C | -0.354707 | -0.717948 | -2.987038 |
| C | -2.658252 | 0.007889  | -2.796393 |
| C | -0.766366 | -1.851756 | -3.686847 |
| H | 0.698740  | -0.545194 | -2.794229 |
| C | -3.069166 | -1.127051 | -3.498835 |
| H | -3.398244 | 0.729953  | -2.465231 |
| C | -2.126474 | -2.061548 | -3.934804 |
| H | -0.026729 | -2.568017 | -4.031160 |
| H | -4.124628 | -1.281952 | -3.701228 |
| H | -2.450473 | -2.947534 | -4.472639 |
| N | -0.873948 | 1.031300  | 0.181480  |
| C | -2.070631 | 0.520877  | 0.568246  |
| C | -2.544538 | 0.719522  | 1.966704  |

|   |           |           |           |
|---|-----------|-----------|-----------|
| C | -1.686372 | 0.702462  | 3.077238  |
| C | -3.917326 | 0.921769  | 2.174772  |
| C | -2.201621 | 0.865944  | 4.362509  |
| H | -0.621406 | 0.576265  | 2.936637  |
| C | -4.429998 | 1.091685  | 3.460923  |
| H | -4.585070 | 0.944469  | 1.318725  |
| C | -3.572311 | 1.059071  | 4.561979  |
| H | -1.528111 | 0.844394  | 5.214737  |
| H | -5.495633 | 1.248098  | 3.600721  |
| H | -3.966352 | 1.186763  | 5.565960  |
| H | -1.887206 | -1.519591 | -0.675478 |
| C | 4.989632  | -2.608604 | 3.781925  |
| H | 5.437541  | -3.566271 | 3.513018  |
| H | 5.725685  | -1.813074 | 3.668328  |
| H | 4.655346  | -2.644330 | 4.815904  |
| H | -2.905768 | 0.544851  | -0.138547 |
| H | 3.630839  | 2.748372  | 1.721453  |
| H | -0.434083 | -2.028386 | 2.635472  |

Vibrational frequencies

|           |          |          |
|-----------|----------|----------|
| -374.8934 | 16.7051  | 19.8711  |
| 23.5121   | 33.4154  | 35.9819  |
| 37.4299   | 38.2199  | 39.1809  |
| 40.7413   | 45.6454  | 47.5017  |
| 49.7761   | 53.1624  | 58.5534  |
| 62.1127   | 65.2789  | 73.2831  |
| 78.0736   | 83.2482  | 87.8407  |
| 90.0887   | 92.7776  | 104.7384 |
| 109.7431  | 120.2843 | 125.9092 |
| 133.5046  | 139.6007 | 145.0271 |
| 153.6424  | 158.2248 | 158.8834 |

|          |          |          |
|----------|----------|----------|
| 164.5260 | 182.1925 | 184.9856 |
| 191.9162 | 198.5580 | 203.6674 |
| 211.6166 | 217.7209 | 222.7480 |
| 231.8814 | 232.3500 | 245.1472 |
| 248.2867 | 250.3298 | 258.3645 |
| 263.0444 | 275.2864 | 281.8877 |
| 286.3495 | 293.2523 | 294.4856 |
| 295.4927 | 301.0162 | 312.1837 |
| 317.5325 | 320.5785 | 334.3511 |
| 346.9403 | 354.6232 | 364.6891 |
| 366.6648 | 374.9693 | 379.1855 |
| 384.1807 | 389.7039 | 398.3606 |
| 400.5572 | 405.3301 | 408.6162 |
| 410.3358 | 410.8920 | 418.0767 |
| 418.3277 | 421.4724 | 436.6482 |
| 440.7627 | 443.1700 | 456.0863 |
| 462.0835 | 472.4292 | 482.1659 |
| 483.2533 | 503.5869 | 522.2068 |
| 523.2880 | 528.4798 | 532.3045 |
| 535.6842 | 547.8717 | 551.9146 |
| 557.1435 | 565.1643 | 572.0218 |
| 575.5599 | 599.8117 | 613.3205 |
| 629.5245 | 631.2703 | 632.0707 |
| 641.1498 | 650.6445 | 658.0433 |
| 668.5569 | 696.5478 | 699.9934 |
| 704.9983 | 712.2134 | 720.0194 |
| 731.9460 | 736.7318 | 746.2670 |
| 748.4370 | 764.3895 | 766.5011 |
| 767.2157 | 768.8658 | 769.8296 |
| 774.9020 | 776.8555 | 780.8699 |
| 795.9004 | 798.1581 | 818.9554 |

|           |           |           |
|-----------|-----------|-----------|
| 821.4718  | 838.8656  | 847.8800  |
| 853.4890  | 858.7495  | 871.7546  |
| 872.1862  | 874.9420  | 883.5337  |
| 886.5104  | 892.0515  | 902.7442  |
| 909.8848  | 914.8636  | 923.7112  |
| 925.8731  | 935.3364  | 938.1160  |
| 938.4314  | 948.5406  | 948.9184  |
| 949.5851  | 954.2225  | 958.9165  |
| 967.4123  | 971.9830  | 973.0170  |
| 978.5984  | 979.4733  | 981.7309  |
| 992.1849  | 992.7094  | 1000.8438 |
| 1002.4568 | 1003.6453 | 1012.5358 |
| 1014.0395 | 1014.7063 | 1015.1188 |
| 1018.9172 | 1021.8424 | 1030.3135 |
| 1033.2637 | 1050.1966 | 1051.2135 |
| 1051.6045 | 1056.7060 | 1057.9124 |
| 1058.5690 | 1064.8682 | 1069.5759 |
| 1083.4311 | 1090.8780 | 1091.7409 |
| 1096.2855 | 1104.5771 | 1110.3239 |
| 1117.4285 | 1119.7140 | 1128.5991 |
| 1134.2555 | 1138.0869 | 1145.4762 |
| 1148.6334 | 1159.8493 | 1174.2601 |
| 1181.5111 | 1188.0668 | 1191.7358 |
| 1193.2054 | 1194.2088 | 1205.0484 |
| 1213.5151 | 1214.5165 | 1216.9848 |
| 1221.1021 | 1223.2740 | 1227.1129 |
| 1243.3005 | 1246.9587 | 1254.0139 |
| 1262.3273 | 1273.5442 | 1275.1397 |
| 1280.6790 | 1284.9620 | 1288.0402 |
| 1291.8055 | 1301.7930 | 1317.1204 |
| 1324.7020 | 1331.9414 | 1336.0174 |

|           |           |           |
|-----------|-----------|-----------|
| 1343.4396 | 1349.6879 | 1352.8105 |
| 1358.4659 | 1360.2604 | 1360.9662 |
| 1371.3313 | 1373.0068 | 1378.8959 |
| 1390.6135 | 1408.7710 | 1410.4372 |
| 1411.7230 | 1412.7638 | 1415.4006 |
| 1416.4761 | 1417.5655 | 1422.6858 |
| 1430.3693 | 1435.4601 | 1446.7253 |
| 1453.8542 | 1456.4773 | 1464.9331 |
| 1468.0243 | 1472.6782 | 1472.9330 |
| 1476.5387 | 1480.5396 | 1481.5892 |
| 1493.4179 | 1494.2493 | 1495.1874 |
| 1496.1851 | 1499.2576 | 1502.0301 |
| 1503.4449 | 1504.1160 | 1506.1115 |
| 1508.9020 | 1509.8475 | 1512.1023 |
| 1515.9883 | 1519.6412 | 1520.3286 |
| 1522.5336 | 1524.1369 | 1525.5808 |
| 1528.7521 | 1532.3372 | 1543.7005 |
| 1549.8702 | 1553.1609 | 1586.3455 |
| 1608.9786 | 1615.4230 | 1623.0677 |
| 1624.3996 | 1626.2069 | 1636.3356 |
| 1642.8991 | 1644.9136 | 1646.7128 |
| 1655.6567 | 1668.1051 | 1671.7795 |
| 1713.2773 | 1754.1943 | 2701.0478 |
| 3023.5717 | 3030.7270 | 3033.8626 |
| 3043.7596 | 3049.8436 | 3054.8462 |
| 3062.9592 | 3067.5629 | 3068.8915 |
| 3069.2201 | 3089.8078 | 3090.2680 |
| 3098.9971 | 3102.8890 | 3107.2474 |
| 3112.0091 | 3118.5572 | 3124.6520 |
| 3127.6171 | 3131.6230 | 3131.9024 |
| 3136.3937 | 3138.6036 | 3155.6719 |

|           |           |           |
|-----------|-----------|-----------|
| 3159.9142 | 3172.7321 | 3174.5427 |
| 3177.6877 | 3180.8218 | 3181.6496 |
| 3183.5843 | 3183.9143 | 3184.6382 |
| 3184.8910 | 3187.9694 | 3189.1250 |
| 3193.0101 | 3193.6861 | 3194.2238 |
| 3196.9790 | 3200.3034 | 3201.7440 |
| 3205.3965 | 3206.0772 | 3206.1170 |
| 3209.3160 | 3212.0538 | 3212.3153 |
| 3215.5901 | 3218.0368 | 3244.3082 |
| 3254.0688 | 3261.4382 | 3328.6029 |

### TS5RR''

Zero-point correction= 0.919379

Thermal correction to Energy= 0.974984

Thermal correction to Enthalpy= 0.975928

Thermal correction to Gibbs Free Energy= 0.829658

Sum of electronic and zero-point Energies= -2909.797244

Sum of electronic and thermal Energies= -2909.741639

Sum of electronic and thermal Enthalpies= -2909.740695

Sum of electronic and thermal Free Energies= -2909.886964

### Cartesian coordinates

|   |          |           |           |
|---|----------|-----------|-----------|
| C | 1.974696 | -3.208668 | 3.596911  |
| C | 0.854747 | -2.771449 | 2.817996  |
| C | 1.194092 | -2.299629 | 1.492390  |
| C | 2.551827 | -2.300900 | 1.078729  |
| C | 3.536349 | -2.790058 | 1.935416  |
| N | 3.233589 | -3.230904 | 3.183229  |
| H | 1.767729 | -3.567661 | 4.606004  |
| C | 2.904599 | -1.828420 | -0.295982 |
| C | 2.783268 | -2.748873 | -1.391190 |



|   |           |           |           |
|---|-----------|-----------|-----------|
| C | 3.283433  | -0.515249 | -0.548050 |
| C | 2.349293  | -4.091947 | -1.202045 |
| C | 3.087427  | -2.315718 | -2.723519 |
| C | 3.589116  | -0.103014 | -1.875643 |
| C | 2.213878  | -4.951497 | -2.269572 |
| H | 2.119333  | -4.430067 | -0.198020 |
| C | 2.941254  | -3.228007 | -3.803821 |
| C | 3.508288  | -0.976551 | -2.930848 |
| H | 3.890707  | 0.924421  | -2.046335 |
| C | 2.509641  | -4.517227 | -3.585130 |
| H | 1.877126  | -5.970347 | -2.103765 |
| H | 3.172234  | -2.885388 | -4.808802 |
| H | 3.747571  | -0.647119 | -3.937995 |
| H | 2.396619  | -5.204274 | -4.418257 |
| C | 0.156424  | -1.879394 | 0.605142  |
| H | 0.374712  | -1.545903 | -0.402023 |
| O | -0.348557 | -2.812155 | 3.265798  |
| C | 4.987497  | -2.830086 | 1.525365  |
| H | 5.127861  | -3.365562 | 0.579144  |
| H | 5.364182  | -1.811397 | 1.388465  |
| H | 5.575936  | -3.329290 | 2.298674  |
| C | 3.431395  | 0.510748  | 0.555164  |
| O | 4.074755  | 0.279660  | 1.587704  |
| N | 2.860169  | 1.703395  | 0.272489  |
| H | 2.223868  | 1.765731  | -0.531710 |
| C | 3.028502  | 2.899633  | 1.093919  |
| C | 1.662435  | 3.598127  | 1.218774  |
| H | 1.777855  | 4.525157  | 1.786753  |
| H | 1.295406  | 3.868284  | 0.219142  |
| O | 0.708999  | 2.809688  | 1.911007  |
| H | 0.383336  | 2.108262  | 1.301126  |

|   |           |           |           |
|---|-----------|-----------|-----------|
| C | 4.165667  | 3.823946  | 0.539675  |
| C | 4.435998  | 4.968885  | 1.536649  |
| H | 3.583801  | 5.647756  | 1.632764  |
| H | 4.671852  | 4.576102  | 2.532443  |
| H | 5.291246  | 5.566213  | 1.202392  |
| C | 3.783807  | 4.409849  | -0.833762 |
| H | 4.634140  | 4.948574  | -1.265874 |
| H | 3.493075  | 3.620210  | -1.534456 |
| H | 2.950452  | 5.115665  | -0.759845 |
| C | 5.461856  | 3.003351  | 0.388966  |
| H | 5.360383  | 2.233311  | -0.380625 |
| H | 6.289598  | 3.658938  | 0.097096  |
| H | 5.726507  | 2.504112  | 1.325699  |
| N | -1.109524 | -1.925894 | 0.971676  |
| C | -2.168201 | -1.430021 | 0.249835  |
| C | -3.493260 | -1.701959 | 0.747561  |
| O | -3.753378 | -2.173654 | 1.854817  |
| O | -4.416221 | -1.279952 | -0.161371 |
| C | -5.855603 | -1.472292 | 0.038597  |
| C | -6.340336 | -0.636407 | 1.226225  |
| H | -5.851420 | -0.955146 | 2.146588  |
| H | -6.122969 | 0.422285  | 1.056192  |
| H | -7.423402 | -0.747886 | 1.337495  |
| C | -6.445647 | -0.947739 | -1.272080 |
| H | -6.074905 | -1.533137 | -2.118665 |
| H | -7.536958 | -1.016530 | -1.250055 |
| H | -6.164451 | 0.098348  | -1.425478 |
| C | -6.170517 | -2.961446 | 0.213580  |
| H | -7.254836 | -3.108762 | 0.212322  |
| H | -5.744332 | -3.534030 | -0.615975 |
| H | -5.761897 | -3.340131 | 1.150234  |

|   |           |           |           |
|---|-----------|-----------|-----------|
| P | -0.487616 | 1.608215  | -1.424053 |
| O | 0.960286  | 1.923112  | -1.754818 |
| C | -1.554950 | 3.078439  | -1.596202 |
| C | -2.073694 | 3.462533  | -2.841838 |
| C | -1.767999 | 3.900275  | -0.476058 |
| C | -2.808965 | 4.642487  | -2.964241 |
| H | -1.911945 | 2.836860  | -3.714495 |
| C | -2.498113 | 5.081965  | -0.604747 |
| H | -1.352841 | 3.620960  | 0.488199  |
| C | -3.022951 | 5.451921  | -1.845925 |
| H | -3.214388 | 4.928418  | -3.930061 |
| H | -2.659356 | 5.712770  | 0.264252  |
| H | -3.596052 | 6.369273  | -1.941842 |
| C | -1.120742 | 0.314010  | -2.534544 |
| C | -0.196491 | -0.658884 | -2.950491 |
| C | -2.482791 | 0.142054  | -2.823821 |
| C | -0.630261 | -1.798924 | -3.626193 |
| H | 0.857071  | -0.519856 | -2.731215 |
| C | -2.912702 | -0.995110 | -3.510422 |
| H | -3.209818 | 0.880274  | -2.501354 |
| C | -1.990639 | -1.968768 | -3.902999 |
| H | 0.092545  | -2.551208 | -3.928029 |
| H | -3.968891 | -1.126018 | -3.724050 |
| H | -2.331714 | -2.858295 | -4.424060 |
| N | -0.658344 | 1.077236  | 0.155105  |
| C | -1.860478 | 0.796854  | 0.664067  |
| C | -2.035424 | 0.735383  | 2.125095  |
| C | -0.964791 | 0.434232  | 2.984513  |
| C | -3.305894 | 0.970540  | 2.676967  |
| C | -1.166095 | 0.377695  | 4.361719  |
| H | 0.017512  | 0.249530  | 2.567708  |

|   |           |           |           |
|---|-----------|-----------|-----------|
| C | -3.501628 | 0.925366  | 4.055045  |
| H | -4.137778 | 1.195807  | 2.017161  |
| C | -2.430191 | 0.627372  | 4.902951  |
| H | -0.333535 | 0.131786  | 5.013872  |
| H | -4.487499 | 1.119524  | 4.467298  |
| H | -2.580987 | 0.586868  | 5.977776  |
| H | -2.022416 | -1.306921 | -0.811253 |
| H | -2.777218 | 1.001210  | 0.102611  |
| H | -1.225577 | -2.250348 | 1.966843  |
| H | 3.325711  | 2.560425  | 2.091424  |

#### Vibrational frequencies

|           |          |          |
|-----------|----------|----------|
| -152.1944 | 15.8678  | 23.5575  |
| 27.5097   | 33.4777  | 36.7354  |
| 38.1764   | 39.5901  | 43.5376  |
| 47.4876   | 52.0660  | 54.0399  |
| 57.4175   | 61.8263  | 65.1554  |
| 65.6721   | 69.8465  | 75.7999  |
| 80.8896   | 92.2532  | 94.0842  |
| 96.3414   | 100.4239 | 105.1693 |
| 107.6703  | 118.7377 | 137.2143 |
| 140.6471  | 143.3584 | 147.6684 |
| 152.9132  | 154.3828 | 159.3379 |
| 171.5214  | 183.1040 | 190.2529 |
| 197.6015  | 202.0568 | 214.4811 |
| 219.3344  | 225.6325 | 230.3063 |
| 232.4009  | 241.6226 | 247.3133 |
| 259.1266  | 266.1450 | 271.8849 |
| 280.8059  | 283.3556 | 287.6895 |
| 289.4401  | 295.5001 | 297.2357 |
| 304.9173  | 317.0760 | 319.2998 |

|          |          |          |
|----------|----------|----------|
| 334.0143 | 341.8140 | 351.0328 |
| 362.3462 | 365.6817 | 369.9610 |
| 375.0415 | 381.8231 | 388.4018 |
| 388.7256 | 393.4884 | 397.1411 |
| 399.0283 | 411.6813 | 419.3937 |
| 420.5225 | 427.1772 | 431.8271 |
| 438.7361 | 447.4399 | 452.4517 |
| 459.0837 | 469.7437 | 485.2370 |
| 488.5003 | 496.3523 | 512.4096 |
| 522.8729 | 526.6060 | 530.1625 |
| 533.1836 | 540.1674 | 543.2437 |
| 549.4543 | 555.1339 | 565.3021 |
| 572.0446 | 604.2696 | 607.0640 |
| 624.8761 | 630.1520 | 631.4599 |
| 633.4751 | 654.8208 | 676.3555 |
| 687.4746 | 699.8985 | 705.2095 |
| 710.9401 | 715.9323 | 719.6457 |
| 735.9041 | 739.4599 | 743.9800 |
| 753.1595 | 762.5248 | 767.7767 |
| 768.4403 | 768.5801 | 772.1460 |
| 774.6545 | 776.1168 | 783.5353 |
| 793.0330 | 798.8589 | 809.1460 |
| 812.7301 | 822.8403 | 845.5370 |
| 856.4261 | 859.4406 | 866.0111 |
| 877.7354 | 878.5530 | 882.2919 |
| 884.5978 | 885.7361 | 890.7779 |
| 903.1034 | 903.8638 | 909.2156 |
| 920.5711 | 933.9455 | 936.9187 |
| 940.1197 | 944.0020 | 945.8333 |
| 951.9570 | 952.8725 | 962.2798 |
| 966.6237 | 969.6480 | 973.6569 |

|           |           |           |
|-----------|-----------|-----------|
| 977.2485  | 979.8420  | 980.3483  |
| 986.4807  | 998.1663  | 1001.3120 |
| 1004.0198 | 1006.0435 | 1011.7151 |
| 1014.1899 | 1015.4096 | 1022.8614 |
| 1023.3539 | 1027.8812 | 1032.4724 |
| 1043.5516 | 1050.2777 | 1050.7935 |
| 1052.4292 | 1053.6300 | 1055.9568 |
| 1060.7535 | 1062.5991 | 1070.6917 |
| 1091.3159 | 1099.7717 | 1105.1790 |
| 1106.8887 | 1113.9737 | 1115.7080 |
| 1116.3168 | 1117.6878 | 1136.7105 |
| 1138.2069 | 1159.4797 | 1171.4583 |
| 1176.6100 | 1182.3642 | 1190.2440 |
| 1192.3728 | 1194.7639 | 1194.8860 |
| 1205.5639 | 1210.9592 | 1216.6668 |
| 1220.2364 | 1221.3880 | 1223.6067 |
| 1238.4176 | 1243.9794 | 1246.5340 |
| 1248.4821 | 1258.9767 | 1266.9124 |
| 1270.2807 | 1273.5624 | 1285.9758 |
| 1286.5917 | 1291.8463 | 1318.4032 |
| 1325.0730 | 1329.4680 | 1330.1767 |
| 1333.2942 | 1337.3070 | 1339.2466 |
| 1353.7411 | 1358.7188 | 1362.7375 |
| 1366.8714 | 1370.4155 | 1377.7682 |
| 1387.9324 | 1400.4799 | 1406.5883 |
| 1409.0479 | 1409.8747 | 1413.2472 |
| 1414.7873 | 1416.4685 | 1427.4796 |
| 1432.3494 | 1432.6690 | 1435.5113 |
| 1445.1171 | 1463.7487 | 1465.5385 |
| 1472.5591 | 1476.7662 | 1480.1063 |
| 1480.6164 | 1484.1254 | 1484.2190 |

|           |           |           |
|-----------|-----------|-----------|
| 1494.8186 | 1495.2593 | 1496.8878 |
| 1497.5880 | 1499.2481 | 1502.0189 |
| 1505.2271 | 1506.9301 | 1511.5449 |
| 1512.8693 | 1516.4663 | 1520.1728 |
| 1520.8626 | 1523.4657 | 1527.0190 |
| 1528.5459 | 1529.8993 | 1534.1647 |
| 1538.8634 | 1549.3207 | 1556.5432 |
| 1608.3197 | 1621.6106 | 1622.8437 |
| 1626.0535 | 1627.3743 | 1632.4468 |
| 1642.8167 | 1645.3038 | 1646.7680 |
| 1654.7983 | 1667.6280 | 1670.6817 |
| 1711.7991 | 1712.3038 | 2925.9532 |
| 3023.1572 | 3032.8042 | 3036.4819 |
| 3037.0029 | 3044.0687 | 3048.6590 |
| 3051.6704 | 3057.7261 | 3071.2158 |
| 3077.4889 | 3099.2357 | 3101.0601 |
| 3101.1005 | 3106.3349 | 3112.3359 |
| 3114.8573 | 3118.4816 | 3119.6109 |
| 3122.2401 | 3126.6898 | 3127.3928 |
| 3131.3311 | 3133.8339 | 3136.2786 |
| 3165.3045 | 3170.5609 | 3179.5954 |
| 3180.0241 | 3183.4434 | 3185.4939 |
| 3186.3968 | 3188.8780 | 3189.7527 |
| 3190.8496 | 3194.5574 | 3195.4232 |
| 3199.9214 | 3201.9715 | 3202.6130 |
| 3204.8985 | 3207.9111 | 3211.0924 |
| 3211.3639 | 3212.1771 | 3215.7777 |
| 3218.0656 | 3230.8513 | 3233.5779 |
| 3283.9053 | 3297.5983 | 3424.5770 |

**TS51RR**

Zero-point correction= 0.989755

Thermal correction to Energy= 1.048634

Thermal correction to Enthalpy= 1.049579

Thermal correction to Gibbs Free Energy= 0.896355

Sum of electronic and zero-point Energies= -2988.814839

Sum of electronic and thermal Energies= -2988.755960

Sum of electronic and thermal Enthalpies= -2988.755016

Sum of electronic and thermal Free Energies= -2988.908239

#### Cartesian coordinates

|   |          |           |           |
|---|----------|-----------|-----------|
| C | 2.830196 | -2.080505 | 3.341690  |
| C | 1.573349 | -1.933653 | 2.700382  |
| C | 1.636183 | -1.711852 | 1.267673  |
| C | 2.887156 | -1.701437 | 0.612332  |
| C | 4.074377 | -1.923388 | 1.313356  |
| N | 3.998598 | -2.082053 | 2.672362  |
| H | 2.867033 | -2.216970 | 4.413552  |
| C | 2.953450 | -1.442631 | -0.861787 |
| C | 2.689262 | -2.503614 | -1.786281 |
| C | 3.235973 | -0.168356 | -1.331146 |
| C | 2.363618 | -3.822081 | -1.360947 |
| C | 2.749151 | -2.233290 | -3.193407 |
| C | 3.270349 | 0.090883  | -2.725221 |
| C | 2.105028 | -4.816686 | -2.277706 |
| H | 2.318618 | -4.038512 | -0.299177 |
| C | 2.482240 | -3.284240 | -4.112505 |
| C | 3.049253 | -0.916513 | -3.632348 |
| H | 3.472894 | 1.101231  | -3.063707 |
| C | 2.164494 | -4.548051 | -3.667244 |
| H | 1.854612 | -5.815706 | -1.934422 |
| H | 2.527616 | -3.068687 | -5.176336 |



|   |          |           |           |
|---|----------|-----------|-----------|
| H | 3.083332 | -0.713138 | -4.698785 |
| H | 1.958417 | -5.341690 | -4.378665 |
| C | 0.413894 | -1.552504 | 0.531062  |
| H | 0.420849 | -1.378669 | -0.535952 |
| O | 0.489172 | -1.999808 | 3.366597  |
| C | 5.422738 | -1.995362 | 0.658006  |
| H | 5.301848 | -2.022174 | -0.423148 |
| H | 6.019625 | -1.110890 | 0.894536  |
| H | 5.972710 | -2.890752 | 0.960822  |
| C | 3.551196 | 0.953808  | -0.366274 |
| O | 4.573381 | 0.914443  | 0.335460  |
| N | 2.659538 | 1.960544  | -0.373731 |
| H | 1.813161 | 1.850191  | -0.950927 |
| C | 2.711939 | 3.042560  | 0.605487  |
| C | 1.716050 | 2.715207  | 1.736747  |
| H | 1.688381 | 3.532405  | 2.471457  |
| H | 0.716910 | 2.582817  | 1.315109  |
| O | 2.003913 | 1.484459  | 2.390365  |
| C | 2.510759 | 4.447040  | -0.043972 |
| C | 2.863971 | 5.537135  | 0.988615  |
| H | 2.173640 | 5.544150  | 1.837267  |
| H | 3.879158 | 5.401515  | 1.378860  |
| H | 2.814608 | 6.525767  | 0.519972  |
| C | 1.066861 | 4.658172  | -0.539045 |
| H | 0.978261 | 5.636758  | -1.024082 |
| H | 0.776861 | 3.893740  | -1.263660 |
| H | 0.345113 | 4.635721  | 0.283639  |
| C | 3.476563 | 4.576766  | -1.238114 |
| H | 3.231937 | 3.859847  | -2.026439 |
| H | 3.420471 | 5.584301  | -1.664187 |
| H | 4.512329 | 4.396166  | -0.928210 |

|   |           |           |           |
|---|-----------|-----------|-----------|
| N | -0.748274 | -1.714256 | 1.127439  |
| C | -1.977263 | -1.456806 | 0.555677  |
| C | -3.124629 | -1.979987 | 1.311583  |
| O | -3.065195 | -2.398012 | 2.460803  |
| O | -4.239483 | -1.859712 | 0.565736  |
| C | -5.545171 | -2.389547 | 1.004228  |
| C | -6.028632 | -1.649986 | 2.253045  |
| H | -5.350538 | -1.813003 | 3.090288  |
| H | -6.098479 | -0.576806 | 2.058375  |
| H | -7.024542 | -2.013856 | 2.523762  |
| C | -6.440416 | -2.082935 | -0.196370 |
| H | -6.064908 | -2.585921 | -1.092131 |
| H | -7.459716 | -2.427492 | -0.001728 |
| H | -6.466059 | -1.006311 | -0.387887 |
| C | -5.430039 | -3.898696 | 1.232129  |
| H | -6.423540 | -4.314155 | 1.424785  |
| H | -5.019900 | -4.383918 | 0.341384  |
| H | -4.785342 | -4.117897 | 2.083635  |
| P | -0.915328 | 1.333874  | -1.622697 |
| O | 0.487348  | 1.649399  | -2.117425 |
| C | -2.073580 | 2.713372  | -1.939261 |
| C | -2.516565 | 2.979219  | -3.244441 |
| C | -2.464983 | 3.564414  | -0.895326 |
| C | -3.338925 | 4.076570  | -3.500410 |
| H | -2.226546 | 2.321934  | -4.059480 |
| C | -3.285294 | 4.663949  | -1.153196 |
| H | -2.127534 | 3.361394  | 0.115726  |
| C | -3.722867 | 4.920922  | -2.454534 |
| H | -3.681354 | 4.272007  | -4.512194 |
| H | -3.584350 | 5.317321  | -0.338975 |
| H | -4.363426 | 5.774908  | -2.653906 |

|   |           |           |           |
|---|-----------|-----------|-----------|
| C | -1.577678 | -0.093675 | -2.549940 |
| C | -0.652306 | -1.048388 | -3.000549 |
| C | -2.951004 | -0.363933 | -2.657950 |
| C | -1.088839 | -2.265239 | -3.524731 |
| H | 0.407663  | -0.827569 | -2.933895 |
| C | -3.387284 | -1.580614 | -3.186593 |
| H | -3.679840 | 0.369858  | -2.327620 |
| C | -2.458139 | -2.534811 | -3.610668 |
| H | -0.360618 | -2.997700 | -3.859305 |
| H | -4.451128 | -1.785078 | -3.261028 |
| H | -2.801038 | -3.483901 | -4.011719 |
| N | -0.954239 | 1.018313  | -0.001266 |
| C | -2.081877 | 0.568750  | 0.591635  |
| C | -2.257630 | 0.850166  | 2.043599  |
| C | -1.156432 | 0.916056  | 2.910082  |
| C | -3.546734 | 1.045929  | 2.558207  |
| C | -1.350657 | 1.167201  | 4.267660  |
| H | -0.155908 | 0.771081  | 2.524006  |
| C | -3.738323 | 1.302212  | 3.916136  |
| H | -4.399400 | 1.002969  | 1.886889  |
| C | -2.638686 | 1.361446  | 4.776389  |
| H | -0.490275 | 1.211481  | 4.929667  |
| H | -4.742429 | 1.456941  | 4.300308  |
| H | -2.784660 | 1.559812  | 5.834310  |
| H | -2.024090 | -1.571048 | -0.519560 |
| C | 5.240758  | -2.254744 | 3.455495  |
| H | 5.714719  | -3.201546 | 3.193913  |
| H | 5.923066  | -1.431767 | 3.243653  |
| H | 4.991721  | -2.254904 | 4.513844  |
| H | -3.033334 | 0.573465  | 0.045265  |
| H | -0.665008 | -1.874142 | 2.161356  |

|   |          |          |          |
|---|----------|----------|----------|
| H | 3.725521 | 3.024202 | 1.014845 |
| C | 3.143767 | 1.513039 | 3.237248 |
| H | 3.123590 | 2.382220 | 3.911826 |
| H | 3.110499 | 0.601337 | 3.838983 |
| H | 4.074553 | 1.518821 | 2.658622 |

Vibrational frequencies

|           |          |          |
|-----------|----------|----------|
| -368.0581 | 19.9692  | 24.0949  |
| 28.2284   | 33.4275  | 35.7969  |
| 37.9370   | 40.7255  | 42.3396  |
| 45.3311   | 47.4331  | 51.6462  |
| 54.1488   | 55.5170  | 56.6468  |
| 62.9043   | 66.3464  | 72.5246  |
| 74.6243   | 79.1267  | 86.3146  |
| 88.9505   | 92.9179  | 94.9856  |
| 102.6835  | 104.6381 | 113.4317 |
| 124.9829  | 130.1989 | 135.3378 |
| 140.7254  | 148.3025 | 153.5688 |
| 156.1047  | 160.7408 | 165.0554 |
| 173.3096  | 188.0177 | 189.8804 |
| 195.7269  | 202.3010 | 218.8013 |
| 221.9623  | 225.1471 | 230.2447 |
| 231.5346  | 239.2655 | 244.9772 |
| 247.3471  | 263.9219 | 265.2133 |
| 270.4794  | 275.9863 | 280.8291 |
| 284.5671  | 292.4213 | 297.3809 |
| 301.1954  | 311.1600 | 317.5478 |
| 325.3475  | 334.0668 | 338.4728 |
| 342.7900  | 359.7720 | 363.2296 |
| 370.0027  | 375.8906 | 380.5324 |
| 386.2891  | 388.1890 | 396.4311 |

|           |           |           |
|-----------|-----------|-----------|
| 407.2275  | 408.3249  | 410.4155  |
| 411.8596  | 418.3456  | 423.5538  |
| 427.1269  | 436.7537  | 442.2778  |
| 443.8275  | 450.6379  | 457.1433  |
| 460.6567  | 471.5147  | 484.0600  |
| 485.4320  | 500.2537  | 520.1335  |
| 520.7287  | 533.0465  | 534.2968  |
| 536.2244  | 546.8184  | 555.4645  |
| 558.3998  | 567.9708  | 570.6434  |
| 574.8489  | 592.0464  | 611.0992  |
| 630.0012  | 631.4580  | 632.0946  |
| 642.6828  | 651.5087  | 663.2054  |
| 673.9993  | 700.6428  | 702.0845  |
| 713.1417  | 717.0795  | 721.1664  |
| 731.3450  | 736.1819  | 744.8690  |
| 747.9933  | 760.7719  | 766.6654  |
| 768.3641  | 769.0400  | 770.5484  |
| 775.9684  | 779.0854  | 794.4158  |
| 795.7197  | 812.3287  | 821.6208  |
| 842.8266  | 844.9610  | 845.0787  |
| 859.6984  | 866.8552  | 868.3731  |
| 873.1791  | 880.4660  | 885.1704  |
| 886.6769  | 890.1056  | 891.6267  |
| 910.9762  | 917.6408  | 931.1015  |
| 936.0429  | 937.6463  | 938.2025  |
| 940.8924  | 944.0303  | 947.7121  |
| 949.3717  | 949.7944  | 955.0339  |
| 966.4398  | 976.7581  | 977.2381  |
| 981.4952  | 981.9592  | 989.4359  |
| 994.0486  | 1002.3685 | 1003.2756 |
| 1009.9125 | 1012.7603 | 1014.2074 |

|           |           |           |
|-----------|-----------|-----------|
| 1014.4911 | 1015.1404 | 1025.0155 |
| 1028.4610 | 1037.8320 | 1041.3727 |
| 1050.6117 | 1051.6904 | 1053.6806 |
| 1055.4453 | 1057.1362 | 1063.4409 |
| 1066.0297 | 1069.5389 | 1079.8991 |
| 1082.6670 | 1098.8322 | 1105.0461 |
| 1105.9447 | 1110.7204 | 1114.4707 |
| 1115.9752 | 1120.9460 | 1132.6067 |
| 1133.9060 | 1143.8958 | 1145.1466 |
| 1154.2066 | 1154.7644 | 1179.8890 |
| 1182.2792 | 1188.2526 | 1188.9107 |
| 1189.1779 | 1193.7912 | 1193.9249 |
| 1202.9698 | 1210.8151 | 1213.5179 |
| 1214.7916 | 1216.0188 | 1226.3083 |
| 1231.2368 | 1237.0959 | 1239.9739 |
| 1246.4819 | 1249.4966 | 1256.6933 |
| 1264.9395 | 1272.5863 | 1276.6097 |
| 1278.1177 | 1290.3309 | 1296.5028 |
| 1312.6055 | 1325.0904 | 1328.1278 |
| 1331.9784 | 1336.6126 | 1343.7130 |
| 1345.0544 | 1352.6881 | 1357.0751 |
| 1360.6937 | 1361.4985 | 1365.2676 |
| 1366.8630 | 1391.2109 | 1404.3609 |
| 1408.9575 | 1411.3533 | 1412.9023 |
| 1414.1739 | 1414.6034 | 1421.0250 |
| 1423.9988 | 1427.7037 | 1436.2225 |
| 1439.4081 | 1441.9984 | 1450.9447 |
| 1454.9119 | 1460.7088 | 1467.5827 |
| 1473.0471 | 1476.5811 | 1478.6652 |
| 1479.9620 | 1481.7330 | 1484.3202 |
| 1487.0744 | 1491.0123 | 1492.8790 |

|           |           |           |
|-----------|-----------|-----------|
| 1494.8823 | 1496.1479 | 1496.5410 |
| 1501.0682 | 1501.9028 | 1504.7847 |
| 1506.2206 | 1507.7150 | 1508.5416 |
| 1511.5377 | 1512.9419 | 1518.7840 |
| 1522.9189 | 1523.1253 | 1525.5721 |
| 1526.6370 | 1532.6832 | 1532.9557 |
| 1537.1069 | 1551.0089 | 1554.1222 |
| 1579.1904 | 1611.2445 | 1622.8219 |
| 1625.6121 | 1626.3108 | 1628.6344 |
| 1636.6972 | 1642.6155 | 1644.9374 |
| 1647.1391 | 1655.2956 | 1671.5994 |
| 1673.4607 | 1706.2301 | 1744.5227 |
| 2981.8883 | 2994.0195 | 3014.2859 |
| 3032.8822 | 3033.2139 | 3036.2900 |
| 3043.7726 | 3051.1974 | 3056.3350 |
| 3063.1344 | 3063.4601 | 3077.5375 |
| 3090.5183 | 3091.0257 | 3100.6608 |
| 3103.3804 | 3106.3965 | 3114.3453 |
| 3122.7926 | 3123.7043 | 3124.7102 |
| 3126.1585 | 3129.1728 | 3130.4284 |
| 3131.4319 | 3137.6015 | 3142.8118 |
| 3163.0772 | 3171.5389 | 3174.6306 |
| 3176.3664 | 3177.7373 | 3180.8232 |
| 3183.4688 | 3183.8284 | 3184.3397 |
| 3187.1611 | 3188.4341 | 3192.9893 |
| 3193.0626 | 3193.2360 | 3196.3303 |
| 3201.4553 | 3201.6691 | 3204.2019 |
| 3205.8482 | 3205.8935 | 3209.1280 |
| 3211.5866 | 3212.1752 | 3215.5377 |
| 3218.5184 | 3232.1206 | 3245.1184 |
| 3254.6009 | 3259.6209 | 3260.4495 |

## TS51SS

Zero-point correction= 0.989344

Thermal correction to Energy= 1.048531

Thermal correction to Enthalpy= 1.049476

Thermal correction to Gibbs Free Energy= 0.893599

Sum of electronic and zero-point Energies= -2988.810540

Sum of electronic and thermal Energies= -2988.751352

Sum of electronic and thermal Enthalpies= -2988.750408

Sum of electronic and thermal Free Energies= -2988.906285

### Cartesian coordinates

|   |          |           |           |
|---|----------|-----------|-----------|
| C | 3.530636 | -3.692008 | 1.095874  |
| C | 2.193918 | -3.249626 | 0.887269  |
| C | 2.073857 | -1.884444 | 0.417312  |
| C | 3.230295 | -1.145199 | 0.084139  |
| C | 4.504987 | -1.667819 | 0.288088  |
| N | 4.604579 | -2.932907 | 0.813812  |
| H | 3.708042 | -4.682117 | 1.492447  |
| C | 3.061503 | 0.195247  | -0.558516 |
| C | 3.038014 | 0.276730  | -1.987432 |
| C | 2.800468 | 1.320982  | 0.205168  |
| C | 3.245075 | -0.857194 | -2.823373 |
| C | 2.771557 | 1.542351  | -2.604597 |
| C | 2.532132 | 2.565790  | -0.418648 |
| C | 3.185151 | -0.743480 | -4.194724 |
| H | 3.439264 | -1.823166 | -2.370555 |
| C | 2.720078 | 1.624584  | -4.022432 |
| C | 2.529700 | 2.676116  | -1.786977 |
| H | 2.305318 | 3.427351  | 0.199889  |
| C | 2.919458 | 0.508317  | -4.802316 |



|   |           |           |           |
|---|-----------|-----------|-----------|
| H | 3.339435  | -1.620652 | -4.815685 |
| H | 2.503388  | 2.586419  | -4.476771 |
| H | 2.298433  | 3.625265  | -2.259465 |
| H | 2.870160  | 0.581783  | -5.884302 |
| C | 0.782212  | -1.270772 | 0.345637  |
| H | 0.669938  | -0.214333 | 0.151478  |
| O | 1.201203  | -4.003561 | 1.134285  |
| C | 5.763033  | -0.902852 | -0.002234 |
| H | 5.510915  | 0.054909  | -0.453364 |
| H | 6.324153  | -0.698682 | 0.915580  |
| H | 6.423416  | -1.439211 | -0.690232 |
| C | 2.742469  | 1.209592  | 1.708721  |
| O | 3.719076  | 0.829685  | 2.370294  |
| N | 1.537380  | 1.534113  | 2.221712  |
| C | 1.234905  | 1.530276  | 3.650539  |
| C | 0.217326  | 0.406161  | 3.996193  |
| O | 0.806071  | -0.686605 | 4.690063  |
| C | 0.812283  | 2.953284  | 4.141443  |
| C | 0.766960  | 2.957553  | 5.682109  |
| H | 0.028416  | 2.255566  | 6.080980  |
| H | 1.743283  | 2.694262  | 6.104407  |
| H | 0.500511  | 3.954805  | 6.047765  |
| C | -0.560567 | 3.366766  | 3.573615  |
| H | -0.797937 | 4.391375  | 3.879949  |
| H | -0.575874 | 3.323741  | 2.480889  |
| H | -1.365815 | 2.722205  | 3.942078  |
| C | 1.871848  | 3.974538  | 3.684415  |
| H | 1.885968  | 4.074843  | 2.595927  |
| H | 1.655998  | 4.960195  | 4.110029  |
| H | 2.875096  | 3.676498  | 4.008916  |
| N | -0.317851 | -1.952570 | 0.568650  |

|   |           |           |           |
|---|-----------|-----------|-----------|
| C | -1.603501 | -1.423970 | 0.484443  |
| C | -2.656704 | -2.389027 | 0.826364  |
| O | -2.483784 | -3.599842 | 0.909569  |
| O | -3.831411 | -1.742806 | 0.942158  |
| C | -5.097640 | -2.443452 | 1.234366  |
| C | -5.430517 | -3.409271 | 0.095234  |
| H | -5.476361 | -2.869930 | -0.855815 |
| H | -4.685778 | -4.202197 | 0.021622  |
| H | -6.410438 | -3.860836 | 0.276806  |
| C | -4.992283 | -3.148325 | 2.588264  |
| H | -4.687533 | -2.435055 | 3.359893  |
| H | -5.969732 | -3.555769 | 2.862832  |
| H | -4.267507 | -3.961709 | 2.551144  |
| C | -6.103261 | -1.294237 | 1.287481  |
| H | -7.104820 | -1.683770 | 1.490128  |
| H | -5.834835 | -0.585755 | 2.075718  |
| H | -6.119461 | -0.753598 | 0.337468  |
| P | -1.367363 | 1.646954  | -0.808911 |
| O | -0.708260 | 1.775833  | 0.564703  |
| C | -3.169396 | 1.885161  | -0.581859 |
| C | -3.671893 | 2.162729  | 0.696738  |
| C | -4.059848 | 1.743321  | -1.657575 |
| C | -5.046345 | 2.304373  | 0.896626  |
| H | -2.976534 | 2.260112  | 1.524467  |
| C | -5.433422 | 1.880920  | -1.456044 |
| H | -3.678727 | 1.520712  | -2.650760 |
| C | -5.927133 | 2.162933  | -0.178322 |
| H | -5.430172 | 2.519963  | 1.889419  |
| H | -6.117907 | 1.767009  | -2.291308 |
| H | -6.996560 | 2.267965  | -0.021619 |
| C | -0.805362 | 2.970809  | -1.917713 |

|   |           |           |           |
|---|-----------|-----------|-----------|
| C | -0.538762 | 4.235194  | -1.371733 |
| C | -0.635030 | 2.759315  | -3.291277 |
| C | -0.106024 | 5.276497  | -2.191633 |
| H | -0.650277 | 4.391195  | -0.302960 |
| C | -0.200548 | 3.802836  | -4.111204 |
| H | -0.816890 | 1.772286  | -3.702986 |
| C | 0.064349  | 5.060372  | -3.563363 |
| H | 0.105484  | 6.251852  | -1.763776 |
| H | -0.060384 | 3.631654  | -5.174335 |
| H | 0.405551  | 5.869872  | -4.201822 |
| N | -1.075967 | 0.251455  | -1.621858 |
| C | -1.837693 | -0.853257 | -1.423692 |
| C | -1.437032 | -2.069684 | -2.185397 |
| C | -0.146652 | -2.172424 | -2.726786 |
| C | -2.325683 | -3.144720 | -2.333867 |
| C | 0.249976  | -3.331845 | -3.391793 |
| H | 0.529614  | -1.331872 | -2.628682 |
| C | -1.931121 | -4.301765 | -3.004391 |
| H | -3.327693 | -3.072505 | -1.922519 |
| C | -0.639213 | -4.401146 | -3.531101 |
| H | 1.253047  | -3.395911 | -3.804261 |
| H | -2.629887 | -5.125678 | -3.116294 |
| H | -0.331534 | -5.303891 | -4.050839 |
| H | -1.712889 | -0.431050 | 0.904454  |
| C | 5.943728  | -3.502654 | 1.078270  |
| H | 6.493051  | -3.600459 | 0.141252  |
| H | 6.491421  | -2.849708 | 1.757875  |
| H | 5.825745  | -4.482637 | 1.533855  |
| H | -2.921950 | -0.745947 | -1.296252 |
| H | -0.176649 | -2.969514 | 0.731942  |
| H | 2.169812  | 1.275046  | 4.157326  |

|   |           |           |          |
|---|-----------|-----------|----------|
| H | -0.558719 | 0.778386  | 4.667362 |
| H | -0.281351 | 0.065939  | 3.076120 |
| H | 0.765856  | 1.716246  | 1.568076 |
| C | 1.587123  | -1.544206 | 3.866142 |
| H | 0.970014  | -2.035217 | 3.101131 |
| H | 2.412168  | -1.013861 | 3.373407 |
| H | 2.006552  | -2.315197 | 4.518135 |

Vibrational frequencies

|           |          |          |
|-----------|----------|----------|
| -409.7558 | 9.6994   | 21.9314  |
| 26.2592   | 26.5680  | 29.4736  |
| 32.3488   | 33.3561  | 37.9105  |
| 39.8091   | 45.4827  | 45.9902  |
| 51.6686   | 54.3709  | 57.0531  |
| 62.9071   | 66.6979  | 68.0456  |
| 70.6332   | 75.3028  | 82.2937  |
| 84.0989   | 90.2183  | 91.6205  |
| 97.1541   | 102.9005 | 109.3348 |
| 114.9718  | 130.0161 | 131.4847 |
| 138.6886  | 140.5783 | 151.7926 |
| 156.9410  | 161.7137 | 165.1020 |
| 180.1249  | 185.0737 | 189.2292 |
| 194.6342  | 206.3802 | 222.7339 |
| 228.8685  | 231.0257 | 235.7619 |
| 238.7951  | 241.1765 | 245.9343 |
| 252.1521  | 257.0923 | 260.6093 |
| 265.5096  | 269.2552 | 274.8359 |
| 282.7733  | 288.3120 | 291.7648 |
| 303.0968  | 307.0029 | 317.1550 |
| 319.8662  | 327.5109 | 332.1298 |
| 338.0653  | 344.5904 | 360.6858 |

|          |          |          |
|----------|----------|----------|
| 373.2843 | 376.4068 | 382.8978 |
| 390.2339 | 399.9608 | 401.1347 |
| 408.1833 | 409.4261 | 410.4169 |
| 419.0062 | 420.2523 | 424.5086 |
| 432.9855 | 438.0452 | 440.0469 |
| 442.7357 | 445.6078 | 458.8283 |
| 459.6655 | 465.5239 | 473.4279 |
| 479.3393 | 485.2097 | 497.9263 |
| 516.5061 | 520.1020 | 535.1059 |
| 536.2811 | 543.9649 | 550.4493 |
| 560.2337 | 572.4536 | 579.7638 |
| 582.8970 | 598.0802 | 614.9426 |
| 629.3966 | 629.6269 | 633.0426 |
| 642.2162 | 650.0047 | 666.3587 |
| 675.2447 | 698.1222 | 704.3368 |
| 708.4071 | 711.3888 | 715.9553 |
| 733.3238 | 747.0094 | 749.4587 |
| 750.3023 | 762.2023 | 763.4956 |
| 764.4893 | 769.1324 | 771.2864 |
| 773.7709 | 782.0645 | 795.7594 |
| 797.5880 | 811.9268 | 814.2185 |
| 846.2860 | 850.3473 | 851.6593 |
| 852.3691 | 865.6787 | 870.0109 |
| 870.7420 | 871.4591 | 884.7072 |
| 887.7756 | 891.0957 | 902.3403 |
| 906.6560 | 916.1365 | 932.0598 |
| 935.1095 | 939.1801 | 942.0270 |
| 943.8145 | 945.1438 | 945.2899 |
| 947.7689 | 954.1502 | 966.7901 |
| 969.8825 | 971.9883 | 977.0070 |
| 981.7181 | 987.8703 | 988.2160 |

|           |           |           |
|-----------|-----------|-----------|
| 989.1204  | 990.0076  | 1003.1931 |
| 1005.9936 | 1009.5372 | 1011.1959 |
| 1012.4058 | 1013.8356 | 1015.1164 |
| 1025.9339 | 1028.3087 | 1037.5680 |
| 1045.1934 | 1048.7479 | 1050.0030 |
| 1050.0976 | 1056.2095 | 1059.7134 |
| 1062.5083 | 1065.6320 | 1073.4126 |
| 1078.9115 | 1083.3629 | 1093.4295 |
| 1102.8070 | 1106.7730 | 1109.9670 |
| 1116.5105 | 1127.7139 | 1131.5418 |
| 1133.3496 | 1145.4513 | 1146.1126 |
| 1148.6491 | 1155.8471 | 1183.9934 |
| 1185.4950 | 1186.7962 | 1191.7070 |
| 1192.0491 | 1192.3670 | 1195.6259 |
| 1201.5690 | 1205.9230 | 1206.4532 |
| 1208.8039 | 1213.7533 | 1223.9916 |
| 1230.5841 | 1231.8734 | 1238.2667 |
| 1248.5343 | 1250.7854 | 1251.6490 |
| 1263.0613 | 1267.4451 | 1274.6192 |
| 1275.5540 | 1292.1435 | 1297.3447 |
| 1314.1072 | 1317.4024 | 1327.2702 |
| 1329.1398 | 1330.9969 | 1339.6639 |
| 1343.4125 | 1346.7767 | 1355.5603 |
| 1356.4574 | 1357.8280 | 1361.8303 |
| 1366.6562 | 1382.0712 | 1405.1790 |
| 1408.5555 | 1412.1039 | 1413.8301 |
| 1414.8607 | 1420.6680 | 1421.0542 |
| 1426.1361 | 1429.3746 | 1432.8825 |
| 1436.6454 | 1441.0329 | 1441.4914 |
| 1449.2114 | 1460.8309 | 1468.6089 |
| 1474.3555 | 1476.1084 | 1479.1964 |

|           |           |           |
|-----------|-----------|-----------|
| 1480.0818 | 1485.0627 | 1486.6483 |
| 1489.1844 | 1491.9577 | 1494.2837 |
| 1495.9802 | 1496.8931 | 1498.3669 |
| 1499.9089 | 1501.9534 | 1503.0892 |
| 1507.4478 | 1507.7876 | 1509.8180 |
| 1512.5738 | 1513.2400 | 1519.4509 |
| 1521.8576 | 1522.3466 | 1526.2789 |
| 1528.6035 | 1532.7556 | 1533.0845 |
| 1534.5153 | 1547.4414 | 1554.5888 |
| 1582.7557 | 1614.8775 | 1624.8827 |
| 1625.5659 | 1626.6426 | 1634.2186 |
| 1636.4012 | 1643.6948 | 1645.0255 |
| 1648.9109 | 1655.1662 | 1670.0611 |
| 1673.1409 | 1712.1363 | 1738.5703 |
| 3004.7296 | 3013.2146 | 3035.2116 |
| 3036.7615 | 3038.7061 | 3043.2606 |
| 3052.6137 | 3054.3584 | 3054.7661 |
| 3060.4448 | 3079.7366 | 3089.8821 |
| 3093.0084 | 3101.3437 | 3104.1912 |
| 3108.8058 | 3110.9915 | 3112.4725 |
| 3118.5442 | 3122.5529 | 3123.3560 |
| 3124.8384 | 3126.6485 | 3129.3079 |
| 3136.7067 | 3139.1484 | 3154.7257 |
| 3161.9302 | 3165.5404 | 3173.1431 |
| 3177.8413 | 3178.4620 | 3178.6279 |
| 3182.1147 | 3184.6424 | 3186.8019 |
| 3187.8737 | 3189.3814 | 3194.5282 |
| 3195.5803 | 3197.7774 | 3199.5770 |
| 3199.7669 | 3200.9860 | 3202.8290 |
| 3203.8761 | 3206.3764 | 3207.1706 |
| 3209.1852 | 3210.1041 | 3212.6275 |

|           |           |           |
|-----------|-----------|-----------|
| 3214.1766 | 3215.1573 | 3226.6948 |
| 3253.5953 | 3271.2153 | 3312.8884 |

### TS52RR

Zero-point correction= 0.989907

Thermal correction to Energy= 1.048428

Thermal correction to Enthalpy= 1.049372

Thermal correction to Gibbs Free Energy= 0.896227

Sum of electronic and zero-point Energies= -2988.801263

Sum of electronic and thermal Energies= -2988.742741

Sum of electronic and thermal Enthalpies= -2988.741797

Sum of electronic and thermal Free Energies= -2988.894942

### Cartesian coordinates

|   |           |           |           |
|---|-----------|-----------|-----------|
| C | -2.032996 | -3.792613 | -2.360835 |
| C | -0.910884 | -3.126621 | -1.811029 |
| C | -1.161046 | -2.396440 | -0.579627 |
| C | -2.432952 | -2.475181 | 0.030472  |
| C | -3.456033 | -3.249716 | -0.528479 |
| N | -3.222897 | -3.855372 | -1.734181 |
| H | -1.934368 | -4.311204 | -3.304233 |
| C | -2.713660 | -1.789633 | 1.334962  |
| C | -2.258364 | -2.402110 | 2.549034  |
| C | -3.455049 | -0.614141 | 1.389051  |
| C | -1.482075 | -3.595648 | 2.558776  |
| C | -2.600959 | -1.804267 | 3.806504  |
| C | -3.816240 | -0.056758 | 2.643568  |
| C | -1.050633 | -4.149906 | 3.743470  |
| H | -1.226335 | -4.070197 | 1.618484  |
| C | -2.141069 | -2.402774 | 5.010337  |
| C | -3.405593 | -0.635441 | 3.818198  |



|   |           |           |           |
|---|-----------|-----------|-----------|
| H | -4.429442 | 0.837699  | 2.665390  |
| C | -1.378576 | -3.548307 | 4.982589  |
| H | -0.454931 | -5.057459 | 3.728024  |
| H | -2.404433 | -1.936979 | 5.955877  |
| H | -3.690407 | -0.201224 | 4.772222  |
| H | -1.030226 | -3.995899 | 5.908246  |
| C | -0.077300 | -1.671792 | 0.030670  |
| H | -0.219543 | -1.029860 | 0.895352  |
| O | 0.225298  | -3.187890 | -2.389145 |
| C | -4.792362 | -3.464970 | 0.121248  |
| H | -4.783835 | -3.058534 | 1.129762  |
| H | -5.582822 | -2.948948 | -0.429273 |
| H | -5.039595 | -4.528440 | 0.186587  |
| C | -3.901340 | 0.046030  | 0.103450  |
| O | -4.622368 | -0.574603 | -0.689723 |
| N | -3.450337 | 1.309491  | -0.133057 |
| C | -3.498041 | 1.794876  | -1.527633 |
| C | -2.052608 | 1.921899  | -2.064110 |
| H | -2.101403 | 2.014368  | -3.156890 |
| H | -1.559857 | 2.828044  | -1.693241 |
| O | -1.327720 | 0.760050  | -1.699224 |
| H | -0.458207 | 1.009209  | -1.296700 |
| C | -4.421816 | 3.030900  | -1.744476 |
| C | -4.451708 | 3.366493  | -3.250657 |
| H | -3.493470 | 3.762624  | -3.600641 |
| H | -4.694728 | 2.482761  | -3.851512 |
| H | -5.213899 | 4.127235  | -3.450348 |
| C | -3.971726 | 4.283866  | -0.967672 |
| H | -4.615515 | 5.130014  | -1.232086 |
| H | -4.048213 | 4.141338  | 0.113405  |
| H | -2.941432 | 4.570806  | -1.198617 |

|   |           |           |           |
|---|-----------|-----------|-----------|
| C | -5.844619 | 2.650196  | -1.291685 |
| H | -5.857654 | 2.383170  | -0.230668 |
| H | -6.532342 | 3.489510  | -1.442098 |
| H | -6.221850 | 1.791931  | -1.857199 |
| N | 1.143022  | -1.833809 | -0.433174 |
| C | 2.290790  | -1.197303 | -0.003053 |
| C | 3.539466  | -1.867410 | -0.387722 |
| O | 3.623673  | -2.744096 | -1.239186 |
| O | 4.569708  | -1.307339 | 0.278283  |
| C | 5.953479  | -1.808081 | 0.158251  |
| C | 6.473576  | -1.598807 | -1.265294 |
| H | 5.868623  | -2.146834 | -1.987355 |
| H | 6.463182  | -0.536466 | -1.523751 |
| H | 7.507816  | -1.951424 | -1.325577 |
| C | 6.709065  | -0.924661 | 1.150485  |
| H | 6.316894  | -1.059928 | 2.162217  |
| H | 7.771568  | -1.183667 | 1.147095  |
| H | 6.601439  | 0.129964  | 0.882957  |
| C | 6.003475  | -3.277995 | 0.582569  |
| H | 7.046148  | -3.604943 | 0.635457  |
| H | 5.553988  | -3.399067 | 1.572748  |
| H | 5.471351  | -3.910794 | -0.128089 |
| P | 1.153558  | 1.828147  | 0.989709  |
| O | 0.426872  | 0.947162  | 1.991611  |
| C | 0.395410  | 3.477680  | 0.858259  |
| C | -0.208793 | 4.033094  | 1.995862  |
| C | 0.401650  | 4.200027  | -0.343198 |
| C | -0.810444 | 5.289399  | 1.928940  |
| H | -0.231804 | 3.463954  | 2.920184  |
| C | -0.202232 | 5.458075  | -0.408540 |
| H | 0.858126  | 3.763687  | -1.225829 |

|   |           |           |           |
|---|-----------|-----------|-----------|
| C | -0.810710 | 6.001449  | 0.725538  |
| H | -1.286418 | 5.709639  | 2.809759  |
| H | -0.204086 | 6.008566  | -1.344467 |
| H | -1.286951 | 6.975765  | 0.671617  |
| C | 2.863395  | 2.136298  | 1.573359  |
| C | 3.344978  | 1.412110  | 2.671666  |
| C | 3.714256  | 3.038066  | 0.915129  |
| C | 4.660071  | 1.585627  | 3.107756  |
| H | 2.681052  | 0.717282  | 3.176392  |
| C | 5.028953  | 3.207760  | 1.348562  |
| H | 3.348870  | 3.605281  | 0.063322  |
| C | 5.502963  | 2.480488  | 2.445250  |
| H | 5.027298  | 1.020669  | 3.959243  |
| H | 5.683199  | 3.904773  | 0.833599  |
| H | 6.527072  | 2.612310  | 2.781317  |
| N | 1.201310  | 1.266500  | -0.580325 |
| C | 2.302624  | 0.594172  | -0.992307 |
| C | 2.443538  | 0.200339  | -2.419637 |
| C | 1.350992  | -0.139580 | -3.232990 |
| C | 3.736545  | 0.147116  | -2.964643 |
| C | 1.558879  | -0.522338 | -4.558524 |
| H | 0.344601  | -0.098626 | -2.836300 |
| C | 3.941481  | -0.232843 | -4.289537 |
| H | 4.584637  | 0.410819  | -2.340913 |
| C | 2.849155  | -0.570965 | -5.092481 |
| H | 0.706114  | -0.787553 | -5.177046 |
| H | 4.949219  | -0.263153 | -4.693325 |
| H | 3.002471  | -0.869347 | -6.125509 |
| H | 2.245615  | -0.791034 | 1.000471  |
| C | -4.304585 | -4.623715 | -2.387772 |
| H | -4.543180 | -5.506263 | -1.792790 |

|   |           |           |           |
|---|-----------|-----------|-----------|
| H | -5.190994 | -3.997624 | -2.486394 |
| H | -3.968162 | -4.933011 | -3.374368 |
| H | 3.266407  | 0.848204  | -0.541905 |
| H | 1.174227  | -2.430871 | -1.302888 |
| H | -3.956471 | 0.972962  | -2.080787 |
| C | -2.576132 | 2.002959  | 0.816500  |
| H | -2.063947 | 2.806776  | 0.301552  |
| H | -3.146647 | 2.456996  | 1.630959  |
| H | -1.816674 | 1.343431  | 1.235817  |

Vibrational frequencies

|           |          |          |
|-----------|----------|----------|
| -383.4539 | 13.0406  | 21.2324  |
| 22.6932   | 28.7746  | 36.1657  |
| 36.6150   | 38.7422  | 42.1792  |
| 43.2628   | 45.8612  | 51.0469  |
| 52.9743   | 54.1606  | 57.5776  |
| 62.8945   | 67.6934  | 69.1382  |
| 71.1532   | 75.2186  | 78.5808  |
| 86.5612   | 92.6555  | 100.0404 |
| 108.3986  | 112.2260 | 120.0123 |
| 134.7114  | 139.3494 | 144.7246 |
| 152.5482  | 154.3742 | 162.7056 |
| 163.8943  | 183.2841 | 184.6731 |
| 189.3142  | 191.1350 | 198.4097 |
| 209.2429  | 211.1463 | 222.2679 |
| 226.1199  | 233.9735 | 241.4516 |
| 242.1084  | 244.6048 | 251.4821 |
| 258.0297  | 261.0418 | 264.4832 |
| 275.8846  | 283.8153 | 290.8299 |
| 296.8679  | 302.6298 | 306.6292 |
| 309.8784  | 315.0122 | 326.2634 |

|          |          |          |
|----------|----------|----------|
| 333.5603 | 335.2574 | 344.3076 |
| 350.2122 | 353.2990 | 362.7884 |
| 364.3026 | 380.6994 | 386.5190 |
| 393.3022 | 403.9253 | 405.7570 |
| 408.6406 | 410.1969 | 413.8495 |
| 414.1240 | 416.7393 | 422.8462 |
| 424.5413 | 427.4021 | 435.0966 |
| 444.0637 | 448.7294 | 452.5584 |
| 458.2712 | 469.3127 | 474.3224 |
| 485.6110 | 493.2106 | 499.3289 |
| 521.8101 | 533.3216 | 533.9936 |
| 544.3503 | 552.7460 | 556.3627 |
| 557.6799 | 569.7114 | 580.3638 |
| 587.7645 | 606.8474 | 611.6379 |
| 629.4995 | 629.5470 | 632.7588 |
| 643.0012 | 656.7682 | 662.0954 |
| 671.8559 | 700.1492 | 702.0579 |
| 710.8924 | 711.5719 | 714.2882 |
| 728.7034 | 731.7438 | 739.5799 |
| 747.9796 | 750.1536 | 761.5918 |
| 762.5774 | 765.3950 | 768.8544 |
| 770.5152 | 773.0680 | 780.3952 |
| 789.6402 | 795.8067 | 796.3634 |
| 809.6558 | 824.5856 | 842.2299 |
| 842.5698 | 852.1707 | 866.0695 |
| 867.2285 | 871.8729 | 875.4401 |
| 886.4621 | 887.9500 | 889.1813 |
| 910.1113 | 922.3664 | 937.1279 |
| 939.3434 | 940.6806 | 942.9585 |
| 943.8295 | 945.4987 | 947.2814 |
| 950.3215 | 961.9127 | 968.9299 |

|           |           |           |
|-----------|-----------|-----------|
| 970.6576  | 979.0036  | 980.9642  |
| 986.9215  | 987.0225  | 992.4394  |
| 995.6559  | 1004.0450 | 1006.0493 |
| 1012.6625 | 1012.7946 | 1013.8258 |
| 1014.5637 | 1015.1789 | 1016.6220 |
| 1027.7908 | 1032.6325 | 1035.8802 |
| 1049.2662 | 1050.4213 | 1057.0498 |
| 1058.1053 | 1058.4684 | 1064.8540 |
| 1065.3401 | 1070.1016 | 1080.4872 |
| 1089.5388 | 1094.6703 | 1096.5037 |
| 1100.5990 | 1103.6851 | 1108.3209 |
| 1118.4872 | 1120.8155 | 1126.9983 |
| 1131.7399 | 1135.3404 | 1145.1769 |
| 1145.7372 | 1153.9931 | 1162.7114 |
| 1177.7265 | 1183.1222 | 1191.5899 |
| 1192.0623 | 1192.4920 | 1193.5971 |
| 1207.7526 | 1207.9709 | 1209.8602 |
| 1214.2484 | 1219.5179 | 1224.6270 |
| 1227.7208 | 1236.9892 | 1237.8884 |
| 1245.8353 | 1248.3006 | 1256.9349 |
| 1262.7179 | 1274.4263 | 1275.7095 |
| 1281.1638 | 1287.7501 | 1290.2480 |
| 1297.5831 | 1319.8120 | 1327.9144 |
| 1329.7406 | 1335.8424 | 1343.5374 |
| 1350.3409 | 1352.3386 | 1356.0194 |
| 1357.0288 | 1359.3156 | 1372.0004 |
| 1380.2350 | 1397.1908 | 1403.2865 |
| 1407.4338 | 1409.6776 | 1413.5213 |
| 1413.6440 | 1416.7288 | 1419.8460 |
| 1423.2450 | 1428.0810 | 1436.4217 |
| 1436.6991 | 1439.2335 | 1446.9849 |

|           |           |           |
|-----------|-----------|-----------|
| 1454.2243 | 1459.8721 | 1466.4354 |
| 1473.8228 | 1475.4186 | 1476.3328 |
| 1480.6338 | 1481.8847 | 1484.1207 |
| 1486.7395 | 1491.7942 | 1493.9858 |
| 1494.1797 | 1496.1991 | 1496.3561 |
| 1498.1158 | 1501.4367 | 1504.4281 |
| 1509.8699 | 1510.4377 | 1511.5667 |
| 1512.2268 | 1515.7445 | 1516.7884 |
| 1521.4103 | 1523.2500 | 1524.2522 |
| 1528.4378 | 1531.2340 | 1538.6290 |
| 1543.0186 | 1547.6795 | 1551.0935 |
| 1554.5530 | 1575.8015 | 1608.1725 |
| 1624.2623 | 1624.9655 | 1626.3204 |
| 1636.0588 | 1643.5672 | 1643.9318 |
| 1646.4679 | 1656.5881 | 1671.4821 |
| 1681.0422 | 1692.4190 | 1740.9833 |
| 2880.2583 | 3021.3556 | 3033.0897 |
| 3037.6188 | 3045.8320 | 3052.3540 |
| 3055.1187 | 3061.0530 | 3063.8320 |
| 3065.4701 | 3070.7613 | 3071.3200 |
| 3090.0264 | 3101.9998 | 3106.6511 |
| 3109.2093 | 3111.4175 | 3112.8613 |
| 3118.6374 | 3124.6970 | 3125.9908 |
| 3129.7810 | 3130.8680 | 3134.0531 |
| 3138.0482 | 3150.1772 | 3163.1074 |
| 3170.7533 | 3174.0813 | 3178.6155 |
| 3180.2107 | 3183.4297 | 3184.2846 |
| 3186.2001 | 3186.6158 | 3187.9052 |
| 3188.1752 | 3191.5046 | 3193.1299 |
| 3195.7535 | 3199.2206 | 3199.3976 |
| 3199.8796 | 3200.7309 | 3203.9790 |

|           |           |           |
|-----------|-----------|-----------|
| 3206.4738 | 3207.3696 | 3208.6768 |
| 3209.2107 | 3210.6751 | 3211.0512 |
| 3212.6470 | 3220.3219 | 3230.1012 |
| 3230.2648 | 3255.9527 | 3307.4710 |

## TS52SS

Zero-point correction= 0.989143

Thermal correction to Energy= 1.048398

Thermal correction to Enthalpy= 1.049342

Thermal correction to Gibbs Free Energy= 0.894470

Sum of electronic and zero-point Energies= -2988.799270

Sum of electronic and thermal Energies= -2988.740015

Sum of electronic and thermal Enthalpies= -2988.739071

Sum of electronic and thermal Free Energies= -2988.893943

## Cartesian coordinates

|   |           |           |           |
|---|-----------|-----------|-----------|
| C | -3.075640 | -1.233286 | 3.533297  |
| C | -1.899999 | -1.404613 | 2.753524  |
| C | -1.745482 | -0.456399 | 1.665180  |
| C | -2.705354 | 0.558605  | 1.473222  |
| C | -3.825706 | 0.665806  | 2.299453  |
| N | -3.972031 | -0.254983 | 3.304875  |
| H | -3.271544 | -1.908930 | 4.354333  |
| C | -2.538485 | 1.539162  | 0.354369  |
| C | -1.870139 | 2.780419  | 0.586344  |
| C | -3.031580 | 1.238085  | -0.904395 |
| C | -1.305499 | 3.118126  | 1.847730  |
| C | -1.765679 | 3.721869  | -0.489181 |
| C | -2.920230 | 2.173114  | -1.964785 |
| C | -0.667464 | 4.324518  | 2.031876  |
| H | -1.376581 | 2.409533  | 2.666194  |



|   |           |           |           |
|---|-----------|-----------|-----------|
| C | -1.109472 | 4.960310  | -0.260590 |
| C | -2.309197 | 3.386775  | -1.758057 |
| H | -3.320634 | 1.916464  | -2.940528 |
| C | -0.569209 | 5.255701  | 0.969665  |
| H | -0.232204 | 4.562859  | 2.997564  |
| H | -1.018207 | 5.661115  | -1.083804 |
| H | -2.224661 | 4.103504  | -2.569823 |
| H | -0.051734 | 6.196466  | 1.124139  |
| C | -0.613586 | -0.557176 | 0.788582  |
| H | -0.473216 | 0.117339  | -0.046972 |
| O | -1.072623 | -2.335304 | 3.013293  |
| C | -4.892757 | 1.705518  | 2.116314  |
| H | -4.594204 | 2.405898  | 1.339650  |
| H | -5.835048 | 1.248277  | 1.799144  |
| H | -5.075461 | 2.272375  | 3.033821  |
| C | -3.787346 | -0.055341 | -1.086218 |
| O | -4.917379 | -0.151425 | -0.585140 |
| N | -3.180897 | -1.066545 | -1.765653 |
| C | -3.881208 | -2.365649 | -1.820454 |
| C | -2.966022 | -3.487051 | -1.302941 |
| O | -2.361861 | -3.163608 | -0.055013 |
| H | -3.059242 | -2.898280 | 0.560051  |
| C | -4.578074 | -2.677178 | -3.192614 |
| C | -3.637461 | -3.337307 | -4.221463 |
| H | -2.754761 | -2.727343 | -4.429062 |
| H | -3.296576 | -4.323392 | -3.890779 |
| H | -4.170065 | -3.478189 | -5.168029 |
| C | -5.141404 | -1.370128 | -3.781193 |
| H | -5.752859 | -1.587633 | -4.663218 |
| H | -5.763145 | -0.848161 | -3.047733 |
| H | -4.340834 | -0.690088 | -4.087872 |

|   |           |           |           |
|---|-----------|-----------|-----------|
| C | -5.755692 | -3.638002 | -2.919924 |
| H | -6.490741 | -3.180823 | -2.248608 |
| H | -6.265462 | -3.887170 | -3.856530 |
| H | -5.422054 | -4.577151 | -2.467259 |
| N | 0.286324  | -1.493503 | 0.974135  |
| C | 1.497299  | -1.573083 | 0.298783  |
| C | 2.243311  | -2.814547 | 0.559295  |
| O | 2.009313  | -3.581054 | 1.485736  |
| O | 3.260635  | -2.914715 | -0.316849 |
| C | 4.228599  | -4.029096 | -0.283770 |
| C | 5.018591  | -3.991280 | 1.025708  |
| H | 5.525950  | -3.027849 | 1.133530  |
| H | 4.363637  | -4.149686 | 1.882739  |
| H | 5.780343  | -4.776572 | 1.012672  |
| C | 3.494279  | -5.356711 | -0.484793 |
| H | 2.881966  | -5.313509 | -1.390470 |
| H | 4.226122  | -6.161406 | -0.602369 |
| H | 2.852468  | -5.584063 | 0.366416  |
| C | 5.131687  | -3.714959 | -1.475768 |
| H | 5.919771  | -4.469000 | -1.555912 |
| H | 4.554467  | -3.710569 | -2.404518 |
| H | 5.593985  | -2.731273 | -1.358929 |
| P | 1.918364  | 1.441665  | -1.057291 |
| O | 0.732233  | 0.904634  | -1.846083 |
| C | 3.466275  | 0.839208  | -1.841124 |
| C | 3.385697  | -0.083971 | -2.891953 |
| C | 4.727793  | 1.227753  | -1.364005 |
| C | 4.547475  | -0.608424 | -3.462185 |
| H | 2.406535  | -0.383918 | -3.251925 |
| C | 5.888748  | 0.702031  | -1.931269 |
| H | 4.801295  | 1.941902  | -0.548098 |

|   |           |           |           |
|---|-----------|-----------|-----------|
| C | 5.799297  | -0.217202 | -2.981804 |
| H | 4.476701  | -1.324194 | -4.275931 |
| H | 6.861333  | 1.006466  | -1.555924 |
| H | 6.703231  | -0.627206 | -3.422490 |
| C | 2.006054  | 3.256564  | -1.142590 |
| C | 1.507423  | 3.900421  | -2.283942 |
| C | 2.605755  | 4.016365  | -0.129269 |
| C | 1.619486  | 5.284529  | -2.416697 |
| H | 1.021094  | 3.312755  | -3.056438 |
| C | 2.716557  | 5.401409  | -0.262642 |
| H | 2.968540  | 3.519432  | 0.764771  |
| C | 2.228328  | 6.035770  | -1.407484 |
| H | 1.228464  | 5.777568  | -3.301909 |
| H | 3.178281  | 5.985504  | 0.528051  |
| H | 2.314771  | 7.113577  | -1.509896 |
| N | 1.951774  | 1.089009  | 0.551603  |
| C | 2.544016  | -0.048768 | 0.995061  |
| C | 2.523671  | -0.262687 | 2.472222  |
| C | 1.561132  | 0.374009  | 3.270356  |
| C | 3.439354  | -1.134237 | 3.077791  |
| C | 1.507660  | 0.129428  | 4.642154  |
| H | 0.871651  | 1.065114  | 2.798562  |
| C | 3.392067  | -1.372865 | 4.451156  |
| H | 4.191212  | -1.625930 | 2.468705  |
| C | 2.421147  | -0.745843 | 5.237126  |
| H | 0.754129  | 0.623782  | 5.248984  |
| H | 4.110918  | -2.047471 | 4.907152  |
| H | 2.380292  | -0.934203 | 6.306047  |
| H | 1.461418  | -1.248128 | -0.734886 |
| C | -5.159019 | -0.187943 | 4.184432  |
| H | -5.154384 | 0.751837  | 4.737399  |

|   |           |           |           |
|---|-----------|-----------|-----------|
| H | -6.065527 | -0.254987 | 3.582753  |
| H | -5.125940 | -1.019906 | 4.883380  |
| H | 3.469225  | -0.396085 | 0.517179  |
| H | 0.102851  | -2.102650 | 1.802960  |
| H | -4.689601 | -2.252884 | -1.093906 |
| H | -3.553294 | -4.412986 | -1.238517 |
| H | -2.137576 | -3.680295 | -1.988136 |
| C | -1.846919 | -0.952645 | -2.352257 |
| H | -1.185294 | -1.715037 | -1.935577 |
| H | -1.892522 | -1.074040 | -3.437831 |
| H | -1.399935 | 0.013564  | -2.136864 |

#### Vibrational frequencies

|           |          |          |
|-----------|----------|----------|
| -398.9800 | 15.5202  | 20.2776  |
| 25.1402   | 28.2242  | 29.8805  |
| 32.8242   | 40.1330  | 41.1281  |
| 45.3651   | 47.4605  | 49.7338  |
| 50.6858   | 55.1827  | 61.6258  |
| 64.1316   | 66.8199  | 70.3441  |
| 71.6431   | 76.5058  | 78.8745  |
| 85.3337   | 89.6640  | 94.4249  |
| 107.1855  | 112.0679 | 119.6438 |
| 125.2395  | 126.1422 | 135.3614 |
| 139.5474  | 147.1992 | 148.7801 |
| 153.2792  | 157.6365 | 163.2917 |
| 176.2372  | 186.6846 | 187.0120 |
| 197.7009  | 203.1436 | 223.4413 |
| 226.5169  | 233.0152 | 234.8700 |
| 243.7730  | 244.2866 | 247.6408 |
| 255.3195  | 256.7644 | 261.0824 |
| 271.4056  | 273.5251 | 284.3176 |

|          |          |          |
|----------|----------|----------|
| 293.1956 | 298.9223 | 307.5160 |
| 309.3084 | 315.0501 | 318.3763 |
| 322.5302 | 331.0039 | 333.4589 |
| 341.7231 | 344.8848 | 348.7985 |
| 363.7548 | 365.6601 | 377.6759 |
| 385.2217 | 391.4874 | 401.1924 |
| 404.5977 | 407.1102 | 408.8880 |
| 409.1601 | 410.8566 | 422.5730 |
| 425.6980 | 428.5888 | 431.5149 |
| 438.2116 | 445.9309 | 447.9721 |
| 455.1912 | 459.7586 | 466.6090 |
| 473.2064 | 484.5889 | 487.1620 |
| 499.0380 | 521.1946 | 533.8082 |
| 534.7991 | 539.7308 | 552.5704 |
| 553.9761 | 558.7447 | 567.6002 |
| 580.2941 | 587.3822 | 603.6925 |
| 607.9972 | 629.8818 | 630.2681 |
| 633.3387 | 644.3944 | 655.6269 |
| 663.1940 | 671.3310 | 702.5112 |
| 703.5611 | 708.5304 | 712.5408 |
| 718.4255 | 721.9480 | 731.3924 |
| 743.6882 | 748.0670 | 750.4897 |
| 762.2665 | 762.7534 | 767.0059 |
| 768.2287 | 770.5045 | 780.1927 |
| 782.5824 | 793.4088 | 797.7935 |
| 810.5125 | 823.6201 | 846.0276 |
| 847.5399 | 847.7475 | 866.6169 |
| 870.6834 | 872.0678 | 872.7726 |
| 880.9942 | 886.0715 | 889.0943 |
| 907.1453 | 922.7367 | 935.3219 |
| 936.1481 | 939.9528 | 941.1635 |

|           |           |           |
|-----------|-----------|-----------|
| 942.9253  | 944.8632  | 948.3141  |
| 949.9843  | 961.2556  | 966.8633  |
| 969.2838  | 975.1004  | 977.3588  |
| 984.1594  | 987.2265  | 989.9546  |
| 990.3679  | 999.7810  | 1006.5070 |
| 1008.5464 | 1010.8087 | 1012.6862 |
| 1013.0500 | 1013.8204 | 1015.3653 |
| 1023.1830 | 1033.0969 | 1040.1289 |
| 1049.4198 | 1050.7360 | 1053.2581 |
| 1055.1024 | 1058.2873 | 1064.4017 |
| 1065.4968 | 1072.5434 | 1073.8534 |
| 1078.8813 | 1080.5173 | 1097.7899 |
| 1098.8118 | 1102.0969 | 1108.1556 |
| 1113.5231 | 1115.4853 | 1129.7621 |
| 1134.5803 | 1136.4153 | 1146.4700 |
| 1154.5604 | 1154.9010 | 1160.4785 |
| 1182.5354 | 1184.3992 | 1188.5047 |
| 1189.7865 | 1191.0219 | 1191.1144 |
| 1193.6002 | 1203.9771 | 1204.9381 |
| 1205.7438 | 1208.9533 | 1216.1051 |
| 1230.0027 | 1232.3201 | 1237.3899 |
| 1246.7978 | 1249.1333 | 1256.6946 |
| 1264.3840 | 1266.8932 | 1269.8773 |
| 1275.2662 | 1275.8834 | 1291.4088 |
| 1298.3851 | 1309.4389 | 1326.1716 |
| 1328.0843 | 1329.3079 | 1340.0724 |
| 1351.9580 | 1353.6322 | 1355.2369 |
| 1357.9191 | 1362.2052 | 1366.3323 |
| 1387.4293 | 1396.8048 | 1406.1453 |
| 1410.0183 | 1411.1923 | 1415.1497 |
| 1416.9073 | 1417.5314 | 1421.5638 |

|           |           |           |
|-----------|-----------|-----------|
| 1428.0042 | 1431.3103 | 1435.9258 |
| 1438.0293 | 1440.3450 | 1440.8054 |
| 1445.9764 | 1455.1877 | 1460.0025 |
| 1469.4720 | 1473.6070 | 1476.0560 |
| 1480.7824 | 1481.4077 | 1484.2756 |
| 1488.6179 | 1488.8553 | 1492.9450 |
| 1495.2648 | 1495.8387 | 1497.0057 |
| 1502.0233 | 1502.2088 | 1503.3134 |
| 1504.8564 | 1507.8535 | 1509.1844 |
| 1510.1074 | 1514.0985 | 1518.2446 |
| 1522.2282 | 1522.4695 | 1523.1689 |
| 1525.6863 | 1531.4166 | 1534.3370 |
| 1535.2698 | 1535.3091 | 1550.6013 |
| 1555.8653 | 1580.7023 | 1615.0158 |
| 1624.7660 | 1626.8837 | 1632.8883 |
| 1635.4597 | 1643.5948 | 1645.4456 |
| 1645.6098 | 1656.1922 | 1673.2105 |
| 1676.0160 | 1682.8226 | 1742.5123 |
| 3027.2519 | 3030.0767 | 3036.1315 |
| 3041.6268 | 3048.6265 | 3052.3298 |
| 3053.8706 | 3055.1025 | 3059.9128 |
| 3059.9914 | 3063.0731 | 3089.5635 |
| 3092.6000 | 3106.2620 | 3108.6361 |
| 3111.6718 | 3114.2193 | 3117.0409 |
| 3119.4435 | 3123.2477 | 3125.0233 |
| 3125.5163 | 3127.9433 | 3134.0789 |
| 3135.9141 | 3138.4941 | 3163.5471 |
| 3166.2009 | 3176.3216 | 3177.2747 |
| 3177.3776 | 3179.4108 | 3184.0531 |
| 3186.0044 | 3186.4174 | 3186.5207 |
| 3188.0319 | 3189.0952 | 3193.5115 |

|           |           |           |
|-----------|-----------|-----------|
| 3195.2875 | 3197.4806 | 3199.5193 |
| 3199.8123 | 3202.9081 | 3203.6654 |
| 3203.8974 | 3204.0734 | 3204.3275 |
| 3207.5853 | 3209.2084 | 3209.6539 |
| 3210.4277 | 3217.0371 | 3217.9422 |
| 3226.4027 | 3255.2179 | 3808.8985 |
